# Supplementary material for: Metabolic basis for the evolution of a common pathogenic Pseudomonas aeruginosa variant
Source: eLife. 2022 May 3;11:e76555. doi: 10.7554/eLife.76555 (PMC9224983; doi:10.7554/eLife.76555)
Supplement: Supplementary file 1. — Fixed mutations (i.e. those mutations present at 100% across all samples at all time points) were excluded from this list as potential background differences from reference strain. All unfixed mutations are listed with unique mutation ID that consists of gene name, mutation position on the genome and the nature of the mutation. ‡ symbol indicates multiple changes within the same codon. Gene identifiers, gene name and product name indicated in Columns 2–5 (i.e. B - E) for each unique mutation ID. Columns 6 through 14 (i.e. F - N) represent the difference in the fractions of sequenced reads for the listed variants from Day 4 to Day 6 (i.e. Day 6 fraction - Day 4 fraction) for each strain and replicate. Columns 14 - end (i.e. N - AE) represent the fraction of the sequenced reads with the listed variant. Columns are labeled by gene knockout_day_replicate_fraction or change. [file elife-76555-supp1.xlsx]

## Sheet: Notes
Supplementary File 1. Unfixed mutations observed in Pool-Seq data from evolved populations. Fixed mutations (i.e. those mutations present at 100% across all samples at all time points) were excluded from this list as potential background differences from reference strain. All unfixed mutations are listed with unique mutation ID that consists of gene name, mutation position on the genome and the n…

## Sheet: Unfixed mutations
Unique_Mutation_ID	RS Gene Identifier	PA14 Gene Identifier	Gene Name	Product Name	WT_change_r1	WT_change_r2	WT_change_r3	cbrA_change_r1	cbrA_change_r2	cbrA_change_r3	cbrB_change_r1	cbrB_change_r2	cbrB_change_r3	WT_4_r1 .fraction	WT_4_r2 .fraction	WT_4_r3 .fraction	WT_6_r1 .fraction	WT_6_r2 .fraction	WT_6_r3 .fraction	cbrA_4_r1 .fraction	cbrA_4_r2 .fraction	cbrA_4_r3 .fraction	cbrA_6_r1 .fraction	cbrA_6_r2 .fraction	cbrA_6_r3 .fraction	cbrB_4_r1 .fraction	cbrB_4_r2 .fraction	cbrB_4_r3 .fraction	cbrB_6_r1 .fraction	cbrB_6_r2 .fraction	cbrB_6_r3 .fraction
PA14_RS18655 ←:4,085,670:L130P (CTC→CCC)	PA14_RS18655	PA14_45960	lasR	transcriptional regulator LasR	0.13	0.25	0.42	0	0	0	0	0	0	0.11	0.12	0.08	0.24	0.37	0.5	0	0	0	0	0	0	0	0	0	0	0	0
PA14_RS18655 ←:4,085,367:A231V (GCC→GTC)	PA14_RS18655	PA14_45960	lasR	transcriptional regulator LasR	0.09	0	0	0	0	0	0	0	0	0	0	0	0.09	0	0	0	0	0	0	0	0	0	0	0	0	0	0
PA14_RS18655 ←:4,085,946:coding (105‑113/720 nt)	PA14_RS18655	PA14_45960	lasR	transcriptional regulator LasR	0.09	-0.11	-0.08	0	0	0	0	0	0	0.06	0.16	0.08	0.15	0.05	0	0	0	0	0	0	0	0	0	0	0	0	0
PA14_RS18655 ←:4,085,511:E183G (GAA→GGA)	PA14_RS18655	PA14_45960	lasR	transcriptional regulator LasR	0.06	0	0	0	0	0	0	0	0	0	0	0	0.06	0	0	0	0	0	0	0	0	0	0	0	0	0	0
PA14_RS18655 ←:4,085,362:N233Y (AAT→TAT)	PA14_RS18655	PA14_45960	lasR	transcriptional regulator LasR	-0.05	0	0	0	0	0	0	0	0	0.05	0	0	0	0	0	0	0	0	0	0	0	0	0	0	0	0	0
PA14_RS18655 ←:4,085,881:W60R (TGG→AGG)	PA14_RS18655	PA14_45960	lasR	transcriptional regulator LasR	-0.06	-0.11	0	0	0	0	0	0	0	0.06	0.11	0	0	0	0	0	0	0	0	0	0	0	0	0	0	0	0
hfq ← / ← miaA:5,820,045:intergenic (‑10/+96)	hfq	PA14_65310	hfq	RNA-binding protein Hfq	0	0	0	0	0	0	-0.08	0.01	0.12	0	0	0	0	0	0	0	0	0	0	0	0	0.08	0.07	0	0	0.08	0.12
hfq ←:5,819,845:P64L (CCG→CTG)	hfq	PA14_65310	hfq	RNA-binding protein Hfq	0	0	0	0	0	0	0	0	0.05	0	0	0	0	0	0	0	0	0	0	0	0	0	0	0	0	0	0.05
hfq ←:5,819,867:H57Y (CAC→TAC)	hfq	PA14_65310	hfq	RNA-binding protein Hfq	0	0	0	0	-0.06	0.06	-0.06	-0.14	-0.06	0	0	0	0	0	0	0	0.06	0	0	0	0.06	0.06	0.14	0.06	0	0	0
hfq ←:5,819,872:Y55C (TAC→TGC)	hfq	PA14_65310	hfq	RNA-binding protein Hfq	0	0	0	0.34	0.43	0.34	0	0	0	0	0	0	0	0	0	0.26	0.16	0.25	0.6	0.59	0.59	0	0	0	0	0	0
PA14_RS28670 →:6,275,181:coding (142/780 nt)	PA14_RS28670	PA14_70390	crc	catabolite repression control protein	0	0	0	0	0	0	0	0	0.09	0	0	0	0	0	0	0	0	0	0	0	0	0	0	0	0	0	0.09
PA14_RS28670 →:6,275,305:coding (266‑270/780 nt)	PA14_RS28670	PA14_70390	crc	catabolite repression control protein	0	0	0	-0.07	-0.06	0	0	0	0	0	0	0	0	0	0	0.07	0.06	0	0	0	0	0	0	0	0	0	0
PA14_RS28670 →:6,275,334:F99V (TTC→GTC)	PA14_RS28670	PA14_70390	crc	catabolite repression control protein	0	0	0	0	0	0	-0.1	-0.03	-0.05	0	0	0	0	0	0	0	0	0	0	0	0	0.1	0.2	0.15	0	0.17	0.1
PA14_RS28670 →:6,275,358:coding (319‑321/780 nt)	PA14_RS28670	PA14_70390	crc	catabolite repression control protein	0	0	0	0	0	0	0.76	0.35	-0.03	0	0	0	0	0	0	0	0	0	0	0	0	0.15	0	0.12	0.91	0.35	0.09
PA14_RS28670 →:6,275,376:Q113* (CAG→TAG)	PA14_RS28670	PA14_70390	crc	catabolite repression control protein	0	0	0	0	-0.1	0	0	0	0	0	0	0	0	0	0	0	0.1	0	0	0	0	0	0	0	0	0	0
PA14_RS28670 →:6,275,461:R141L (CGC→CTC)	PA14_RS28670	PA14_70390	crc	catabolite repression control protein	0	0	0	-0.07	-0.08	0	0	0	0	0	0	0	0	0	0	0.07	0.08	0	0	0	0	0	0	0	0	0	0
PA14_RS28670 →:6,275,476:C146F (TGC→TTC)	PA14_RS28670	PA14_70390	crc	catabolite repression control protein	0	0	0	-0.14	-0.11	-0.15	0	0	0	0	0	0	0	0	0	0.14	0.11	0.15	0	0	0	0	0	0	0	0	0
PA14_RS28670 →:6,275,521:W161* (TGG→TAG)	PA14_RS28670	PA14_70390	crc	catabolite repression control protein	0	0	0	0	0	0	-0.09	0.02	-0.08	0	0	0	0	0	0	0	0	0	0	0	0	0.09	0.15	0.08	0	0.17	0
PA14_RS28670 →:6,275,554:coding (515/780 nt)	PA14_RS28670	PA14_70390	crc	catabolite repression control protein	0	0	0	-0.1	-0.16	-0.17	0	0	0	0	0	0	0	0	0	0.1	0.16	0.17	0	0	0	0	0	0	0	0	0
PA14_RS28670 →:6,275,599:coding (560‑649/780 nt)	PA14_RS28670	PA14_70390	crc	catabolite repression control protein	0	0	0	0	0	-0.08	0	0	0	0	0	0	0	0	0	0	0	0.08	0	0	0	0	0	0	0	0	0
PA14_RS28670 →:6,275,651:W204* (TGG→TGA)	PA14_RS28670	PA14_70390	crc	catabolite repression control protein	0	0	0	0	0	0	-0.05	0	0.24	0	0	0	0	0	0	0	0	0	0	0	0	0.05	0	0	0	0	0.24
PA14_RS28670 →:6,275,713:T225I (ACC→ATC)	PA14_RS28670	PA14_70390	crc	catabolite repression control protein	0	0	0	0	-0.09	0	0	0	0	0	0	0	0	0	0	0	0.09	0	0	0	0	0	0	0	0	0	0
PA14_RS28670 →:6,275,781:coding (742/780 nt)	PA14_RS28670	PA14_70390	crc	catabolite repression control protein	0	0	0	0	0	0	0	0	-0.07	0	0	0	0	0	0	0	0	0	0	0	0	0	0	0.07	0	0	0
fleR ←:4,458,353:P398P (CCG→CCC)	fleR	PA14_50180	fleR	two-component response regulator	0.1	0	0.09	0.12	0	0	0	0	0.13	0	0	0	0.1	0	0.09	0	0	0	0.12	0	0	0	0	0	0	0	0.13
fleR ←:4,458,390:P386R (CCG→CGG) ‡	fleR	PA14_50180	fleR	two-component response regulator	0.04	0.1	0.07	0.08	-0.06	0.07	0.02	0	-0.08	0.09	0	0	0.13	0.1	0.07	0	0.06	0	0.08	0	0.07	0.06	0	0.08	0.08	0	0
fleR ←:4,458,364:A395P (GCC→CCC)	fleR	PA14_50180	fleR	two-component response regulator	0.03	-0.01	0.09	0.09	0.06	-0.06	0	-0.02	-0.03	0.1	0.12	0	0.13	0.11	0.09	0	0.07	0.14	0.09	0.13	0.08	0.11	0.13	0.14	0.11	0.11	0.11
fleR ←:4,458,343:I402F (ATT→TTT)	fleR	PA14_50180	fleR	two-component response regulator	0	0.07	0.05	0	0	-0.07	0	0.05	-0.07	0	0	0	0	0.07	0.05	0	0	0.07	0	0	0	0	0	0.07	0	0.05	0
fleR ←:4,458,324:G408A (GGC→GCC)	fleR	PA14_50180	fleR	two-component response regulator	0	0	0	0	0.09	0	0	-0.09	0	0	0	0	0	0	0	0	0	0	0	0.09	0	0	0.09	0	0	0	0
fleR ←:4,458,328:A407P (GCA→CCA)	fleR	PA14_50180	fleR	two-component response regulator	0	0	0	0	0	0	0	0	-0.06	0	0	0	0	0	0	0	0	0	0	0	0	0	0	0.06	0	0	0
fleR ←:4,458,331:A406P (GCC→CCC)	fleR	PA14_50180	fleR	two-component response regulator	0	0	0	0	0	-0.07	0	0	0	0	0	0	0	0	0	0	0	0.07	0	0	0	0	0	0	0	0	0
fleR ←:4,458,337:S404A (TCG→GCG)	fleR	PA14_50180	fleR	two-component response regulator	0	0	0	0	0	0	0.14	0	0	0	0	0	0	0	0	0	0	0	0	0	0	0	0	0	0.14	0	0
fleR ←:4,458,350:S399R (AGC→AGG)	fleR	PA14_50180	fleR	two-component response regulator	0	0	0	0	0.13	0	0	0	0	0	0	0	0	0	0	0	0	0	0	0.13	0	0	0	0	0	0	0
fleR ←:4,458,352:S399R (AGC→CGC)	fleR	PA14_50180	fleR	two-component response regulator	0	0	0	0	0	0	-0.07	0	0	0	0	0	0	0	0	0	0	0	0	0	0	0.07	0	0	0	0	0
fleR ←:4,458,365:P394P (CCG→CCC)	fleR	PA14_50180	fleR	two-component response regulator	0	0	0	0	0	0	-0.11	0.09	0.14	0	0	0	0	0	0	0	0	0	0	0	0	0.11	0	0	0	0.09	0.14
fleR ←:4,458,382:M389L (ATG→CTG)	fleR	PA14_50180	fleR	two-component response regulator	0	0	0	0	0	0	0.12	0	0	0	0	0	0	0	0	0	0	0	0	0	0	0	0	0	0.12	0	0
fleR ←:4,458,387:V387G (GTG→GGG)	fleR	PA14_50180	fleR	two-component response regulator	0	0	0	0.06	0	0	-0.01	0	0	0	0	0	0	0	0	0	0	0	0.06	0	0	0.07	0	0	0.06	0	0
fleR ←:4,458,381:M389R (ATG→AGG)	fleR	PA14_50180	fleR	two-component response regulator	0	-0.08	0	0	0	0	0	0	0	0	0.08	0	0	0	0	0	0	0	0	0	0	0	0	0	0	0	0
fleR ←:4,458,390:P386R (CCG→CGG)	fleR	PA14_50180	fleR	two-component response regulator	0	-0.12	-0.07	-0.1	0	-0.09	0	0.1	0.1	0	0.12	0.07	0	0	0	0.1	0	0.09	0	0	0	0	0	0	0	0.1	0.1
fleR ←:4,458,371:M392I (ATG→ATC)	fleR	PA14_50180	fleR	two-component response regulator	0	0.02	-0.09	0	0	0	0.01	0.04	-0.08	0	0.1	0.09	0	0.12	0	0	0	0	0	0	0	0.11	0.08	0.16	0.12	0.12	0.08
fleR ←:4,458,326:A407A (GCA→GCC)	fleR	PA14_50180	fleR	two-component response regulator	-0.04	0.07	0.13	0	0.05	-0.09	-0.04	-0.08	0.11	0.11	0	0	0.07	0.07	0.13	0.07	0.08	0.09	0.07	0.13	0	0.11	0.08	0	0.07	0	0.11
fleR ←:4,458,391:P386A (CCG→GCG) ‡	fleR	PA14_50180	fleR	two-component response regulator	-0.04	0.09	0.1	0.17	-0.11	0.12	-0.01	0	-0.09	0.14	0	0	0.1	0.09	0.1	0	0.11	0	0.17	0	0.12	0.12	0	0.09	0.11	0	0
fleR ←:4,458,372:M392K (ATG→AAG) ‡	fleR	PA14_50180	fleR	two-component response regulator	-0.06	0	0	0	0	0	0	0	0	0.06	0	0	0	0	0	0	0	0	0	0	0	0	0	0	0	0	0
fleR ←:4,458,371:M392I (ATG→ATC) ‡	fleR	PA14_50180	fleR	two-component response regulator	-0.12	0	0	0	0	0	0	0	0	0.12	0	0	0	0	0	0	0	0	0	0	0	0	0	0	0	0	0
PA14_RS22670 →:4,947,631:M149R (ATG→CGG)	PA14_RS22670	PA14_55600		hypothetical protein	1	0	0	0	0	0	0	0	0	0	0	0	1	0	0	1	0	0	1	0	0	0	0	0	0	0	0
tadZ ←:4,991,549:Q89L (CAG→CTG)	tadZ				0.39	0	0	0	0	0	-0.04	-0.28	-0.29	0	0	0	0.39	0	0	0	0	0	0	0	0	0.27	0.28	0.29	0.23	0	0
PA14_RS19460 →:4,261,293:P181P (CCG→CCC)	PA14_RS19460	PA14_47880		transcriptional regulator	0.32	0.2	0.25	0.28	-0.17	-0.26	0.05	-0.27	-0.21	0	0	0	0.32	0.2	0.25	0	0.17	0.26	0.28	0	0	0.23	0.27	0.21	0.28	0	0
rpsF ← / ← rlmB:5,809,301:intergenic (‑187/+30)	rpsF	PA14_65180	rpsF	30S ribosomal protein S6	0.31	0	0	0	-0.09	-0.36	-0.12	0.25	-0.09	0	0.22	0	0.31	0.22	0	0	0.24	0.36	0	0.15	0	0.23	0	0.09	0.11	0.25	0
PA14_RS00500 →:117,283:R59G (CGC→GGC) ‡	PA14_RS00500	PA14_01190		3-oxoacyl-ACP synthase	0.3	0.04	0.2	0.28	-0.26	-0.04	-0.03	-0.14	0.03	0	0.23	0	0.3	0.27	0.2	0	0.26	0.31	0.28	0	0.27	0.25	0.33	0.23	0.22	0.19	0.26
PA14_RS18995 ←:4,165,332:G133G (GGC→GGG)	PA14_RS18995	PA14_46750		hypothetical protein	0.29	0.27	-0.32	-0.29	0.22	-0.23	0.04	0	0	0	0	0.32	0.29	0.27	0	0.29	0	0.23	0	0.22	0	0.22	0	0	0.26	0	0
PA14_RS11920 → / → PA14_RS11925:2,531,324:intergenic (+35/‑22)	PA14_RS11920	PA14_29240		hydrolase	0.27	0	-0.01	-0.01	-0.28	0.21	-0.04	-0.26	-0.19	0	0	0.2	0.27	0	0.19	0.22	0.28	0	0.21	0	0.21	0.21	0.26	0.19	0.17	0	0
tadZ ←:4,991,531:M95R (ATG→AGG)	tadZ				0.25	0.06	0.01	-0.04	-0.09	0.02	0.08	0.03	0.05	0	0.26	0.32	0.25	0.32	0.33	0.31	0.31	0.33	0.27	0.22	0.35	0.26	0.28	0.27	0.34	0.31	0.32
PA14_RS13650 →:2,948,749:D403V (GAT→GTT)	PA14_RS13650	PA14_33500	pvdH	diaminobutyrate--2-oxoglutarate aminotransferase	0.23	0.27	0.07	-0.01	0.1	-0.23	0.09	-0.12	-0.24	0	0	0.25	0.23	0.27	0.32	0.21	0.21	0.23	0.2	0.31	0	0.18	0.3	0.24	0.27	0.18	0
prpF →:4,788,266:L337H (CTC→CAC)	prpF				0.22	-0.15	0.15	0	-0.16	0.02	-0.15	0.18	-0.21	0	0.15	0	0.22	0	0.15	0	0.16	0.22	0	0	0.24	0.15	0	0.21	0	0.18	0
rcpA ←:4,992,359:E239V (GAG→GTG)	rcpA				0.22	0.02	0.09	0.01	-0.19	0	-0.03	-0.01	-0.15	0	0.17	0.17	0.22	0.19	0.26	0.19	0.19	0.21	0.2	0	0.21	0.26	0.2	0.27	0.23	0.19	0.12
sucC ← / ← lpdA:3,913,533:intergenic (‑205/+124)	sucC	PA14_43950	sucC	succinyl-CoA synthetase subunit beta	0.22	0	0	0	0	0.17	0.23	0	0	0	0	0	0.22	0	0	0	0	0	0	0	0.17	0	0	0	0.23	0	0
rpsF ← / ← rlmB:5,809,299:intergenic (‑185/+32)	rpsF	PA14_65180	rpsF	30S ribosomal protein S6	0.22	0	0	0	0	0	0	-0.13	0	0	0	0	0.22	0	0	0	0	0	0	0	0	0	0.13	0	0	0	0
PA14_RS00500 →:117,285:R59R (CGC→CGG) ‡	PA14_RS00500	PA14_01190		3-oxoacyl-ACP synthase	0.22	0.07	0.27	0.28	-0.23	-0.02	0	0	0	0	0.16	0	0.22	0.23	0.27	0	0.23	0.26	0.28	0	0.24	0.2	0.21	0.2	0.2	0.21	0.2
PA14_RS14185 →:3,098,233:S483R (AGC→CGC)	PA14_RS14185	PA14_34840		non-ribosomal peptide synthetase	0.22	0.07	-0.09	0.05	-0.02	0.09	-0.08	-0.12	-0.02	0	0.17	0.27	0.22	0.24	0.18	0.15	0.17	0.15	0.2	0.15	0.24	0.26	0.25	0.19	0.18	0.13	0.17
PA14_RS16130 →:3,547,492:V196G (GTC→GGC)	PA14_RS16130	PA14_39810		transmembrane sensor	0.22	-0.15	-0.15	0.03	-0.01	0.15	-0.15	0.23	-0.11	0	0.15	0.15	0.22	0	0	0.16	0.18	0	0.19	0.17	0.15	0.15	0	0.25	0	0.23	0.14
tadZ ←:4,991,518:A99A (GCG→GCC) ‡	tadZ				0.21	0.14	0	0	0	0	0	0	-0.21	0	0	0	0.21	0.14	0	0	0	0	0	0	0	0	0	0.21	0	0	0
PA14_RS00500 →:117,290:R61P (CGC→CCC)	PA14_RS00500	PA14_01190		3-oxoacyl-ACP synthase	0.21	0	0.32	0	-0.25	0	0.28	0	-0.16	0	0	0	0.21	0	0.32	0	0.25	0	0	0	0	0	0	0.16	0.28	0	0
eat ← / ← PA14_RS04780:1,022,433:intergenic (‑185/+25)	PA14_RS04780	PA14_11810		aldehyde dehydrogenase	0.21	0	0	0	0	0	0	0.21	0	0	0	0	0.21	0	0	0	0	0	0	0	0	0	0	0	0	0.21	0
xylB ←:3,056,095:R197P (CGC→CCC)	xylB				0.2	0	0.22	0	0	0	0	0	0	0	0	0	0.2	0	0.22	0	0	0	0	0	0	0	0	0	0	0	0
xylB ←:3,056,102:R195G (CGC→GGC)	xylB				0.2	0	0	-0.14	0.18	0	-0.22	0	-0.14	0	0	0	0.2	0	0	0.14	0	0	0	0.18	0	0.22	0	0.14	0	0	0
tadZ ←:4,991,529:R96G (CGC→GGC)	tadZ				0.2	0	-0.21	0.18	0	-0.03	0.22	0	0	0	0	0.21	0.2	0	0	0	0	0.19	0.18	0	0.16	0	0	0	0.22	0	0
PA14_RS13175 →:2,807,679:G274G (GGC→GGG)	PA14_RS13175	PA14_32300		kinase	0.2	-0.16	0.25	0	-0.24	0	0	0	0	0	0.16	0	0.2	0	0.25	0	0.24	0	0	0	0	0	0	0	0	0	0
PA14_RS23285 ← / ← PA14_RS23290:5,088,760:intergenic (‑121/+112)	PA14_RS23285	PA14_57110		hypothetical protein	0.2	0.02	0.01	0.03	-0.17	-0.07	-0.03	-0.01	0.01	0	0.11	0.11	0.2	0.13	0.12	0.15	0.17	0.19	0.18	0	0.12	0.15	0.15	0.17	0.12	0.14	0.18
cmoB →:4,816,018:L317R (CTG→CGG)	cmoB				0.19	0.19	-0.01	-0.02	0.05	-0.14	-0.14	0.01	-0.2	0	0	0.12	0.19	0.19	0.11	0.15	0.12	0.14	0.13	0.17	0	0.14	0.14	0.2	0	0.15	0
PA14_RS19295 ← / ← PA14_RS19300:4,227,832:intergenic (‑234/+21)	PA14_RS19295	PA14_47440		2-hydroxyacid dehydrogenase	0.19	0.19	0.16	0.16	0.15	0.17	0.07	0.19	-0.16	0	0	0	0.19	0.19	0.16	0	0	0	0.16	0.15	0.17	0.1	0	0.16	0.17	0.19	0
PA14_RS07925 ← / ← PA14_RS07930:1,705,588:intergenic (‑89/+2)	PA14_RS07925	PA14_19770		hypothetical protein	0.19	0.23	0	0	0	0	0	0	0	0	0	0	0.19	0.23	0	0	0	0	0	0	0	0	0	0	0	0	0
acs → / → PA14_RS25600:5,589,429:intergenic (+28/‑69)	PA14_RS25600	PA14_62640		hypothetical protein	0.19	0	-0.03	0	0	-0.01	0	0	0.19	0	0	0.18	0.19	0	0.15	0	0	0.18	0	0	0.17	0	0	0	0	0	0.19
PA14_RS18840 → / ← PA14_RS18845:4,130,097:intergenic (+78/+12)	PA14_RS18840	PA14_46420		short chain dehydrogenase	0.19	0.16	-0.14	0.17	0	0	0.16	0	0	0	0	0.14	0.19	0.16	0	0	0	0	0.17	0	0	0	0	0	0.16	0	0
PA14_RS14845 ← / ← PA14_RS14850:3,247,848:intergenic (‑36/+20)	PA14_RS14845	PA14_36480		hypothetical protein	0.19	0	-0.14	0	0	-0.13	0.08	0.18	0	0	0	0.14	0.19	0	0	0	0	0.13	0	0	0	0.14	0	0	0.22	0.18	0
cmoB →:4,816,027:R320P (CGC→CCC)	cmoB				0.18	0	-0.22	0	0	0.18	-0.19	0	-0.31	0	0	0.22	0.18	0	0	0	0	0	0	0	0.18	0.19	0	0.31	0	0	0
PA14_RS13685 ←:2,954,200:A9A (GCC→GCG)	PA14_RS13685	PA14_33570		hypothetical protein	0.18	0.17	0.26	-0.2	0	0	0	-0.19	-0.21	0	0	0	0.18	0.17	0.26	0.2	0	0	0	0	0	0	0.19	0.21	0	0	0
PA14_RS05280 →:1,128,131:N640Y (AAC→TAC)	PA14_RS05280	PA14_13130		hypothetical protein	0.18	0	0	-0.19	0	0	0	0	0	0	0	0	0.18	0	0	0.19	0	0	0	0	0	0	0	0	0	0	0
PA14_RS13495 →:2,898,663:S11R (AGC→CGC) ‡	PA14_RS13495	PA14_33110		hypothetical protein	0.17	0.05	0.19	0.11	0.14	0.18	0	-0.14	-0.14	0	0.13	0	0.17	0.18	0.19	0	0	0	0.11	0.14	0.18	0	0.14	0.14	0	0	0
PA14_RS00255 ← / → PA14_RS00260:63,014:intergenic (‑76/‑687)	PA14_RS00255	PA14_00620		hypothetical protein	0.17	-0.11	0.16	0.14	0.04	-0.19	-0.14	0.02	-0.11	0	0.11	0	0.17	0	0.16	0	0.16	0.19	0.14	0.2	0	0.14	0.07	0.11	0	0.09	0
PA14_RS26880 ← / ← PA14_RS26885:5,865,019:intergenic (‑198/+61)	PA14_RS26880	PA14_65840		enoyl-CoA hydratase/isomerase	0.17	0	0	0	0	-0.15	0.17	0	0.16	0	0	0.15	0.17	0	0.15	0	0	0.15	0	0	0	0	0	0	0.17	0	0.16
PA14_RS21390 →:4,659,518:L158V (CTG→GTG)	PA14_RS21390	PA14_52530		transcriptional regulator	0.17	0	-0.14	0.16	0.15	0	-0.14	0	0	0	0	0.14	0.17	0	0	0	0	0	0.16	0.15	0	0.14	0	0	0	0	0
PA14_RS13495 →:2,898,664:S11T (AGC→ACC) ‡	PA14_RS13495	PA14_33110		hypothetical protein	0.16	-0.04	0.18	0.14	0.19	0.16	0	-0.12	-0.15	0	0.17	0	0.16	0.13	0.18	0	0	0	0.14	0.19	0.16	0	0.12	0.15	0	0	0
PA14_RS09370 ← / ← gltS:2,006,555:intergenic (‑209/+20)	PA14_RS09370	PA14_23130		sensory box GGDEF domain-containing protein	0.16	0.12	0	-0.13	-0.03	-0.24	-0.15	0	0.2	0	0	0	0.16	0.12	0	0.26	0.18	0.24	0.13	0.15	0	0.15	0	0	0	0	0.2
PA14_RS16130 →:3,547,489:R195P (CGG→CCG)	PA14_RS16130	PA14_39810		transmembrane sensor	0.16	0	0	0.17	-0.2	0	0	0	0	0	0	0	0.16	0	0	0	0.2	0	0.17	0	0	0	0	0	0	0	0
PA14_RS14845 ← / ← PA14_RS14850:3,247,854:intergenic (‑42/+14)	PA14_RS14845	PA14_36480		hypothetical protein	0.16	-0.18	0	-0.01	0	-0.2	0.26	0.11	-0.14	0	0.18	0	0.16	0	0	0.16	0	0.2	0.15	0	0	0	0.12	0.14	0.26	0.23	0
trbL → / → PA14_RS06215:1,316,002:intergenic (+14/‑53)	PA14_RS06215				0.15	0	0	0	0	0	0	0	0.43	0	0	0	0.15	0	0	0	0	0	0	0	0	0	0	0	0	0	0.43
rcpA ←:4,992,335:G247A (GGC→GCC)	rcpA				0.15	0	-0.11	-0.16	-0.15	0.18	0.14	0.14	0.14	0	0	0.11	0.15	0	0	0.16	0.15	0	0	0	0.18	0	0	0	0.14	0.14	0.14
sucC ← / ← lpdA:3,913,529:intergenic (‑201/+128)	sucC	PA14_43950	sucC	succinyl-CoA synthetase subunit beta	0.15	0	0	0.01	0	-0.18	0.1	0	0	0	0	0	0.15	0	0	0.14	0	0.18	0.15	0	0	0	0	0	0.1	0	0
PA14_RS20875 →:4,563,762:S309T (AGC→ACC) ‡	PA14_RS20875	PA14_51340	mvfR	transcriptional regulator MvfR	0.15	-0.13	-0.15	-0.14	0.17	0	0.02	-0.05	-0.05	0	0.13	0.15	0.15	0	0	0.14	0	0	0	0.17	0	0.13	0.13	0.2	0.15	0.08	0.15
gabP ←:144,266:L348R (CTG→CGG)	gabP	PA14_01580	gabP	gamma-aminobutyrate permease	0.15	0	0	0	-0.23	0	0.15	0	0	0	0	0	0.15	0	0	0	0.23	0	0	0	0	0	0	0	0.15	0	0
PA14_RS13080 →:2,785,476:A33P (GCC→CCC)	PA14_RS13080	PA14_31990	czcB	cobalt/zinc/cadmium efflux RND transporter, membrane fusion protein, CzcB famil	0.15	-0.08	0.18	0.17	0.01	0.01	-0.15	-0.13	-0.15	0	0.17	0	0.15	0.09	0.18	0	0.14	0.17	0.17	0.15	0.18	0.15	0.13	0.15	0	0	0
PA14_RS04595 ←:987,027:A99P (GCG→CCG)	PA14_RS04595	PA14_11350		hypothetical protein	0.15	0.01	0.02	0.02	-0.11	0.02	0.02	0.1	-0.03	0	0.14	0.12	0.15	0.15	0.14	0.12	0.11	0.17	0.14	0	0.19	0.16	0.1	0.13	0.18	0.2	0.1
PA14_RS13320 ← / ← PA14_RS13325:2,837,528:intergenic (‑17/+61)	PA14_RS13320	PA14_32660		MFS family transporter	0.15	0.19	0	-0.2	-0.19	0.2	0	-0.05	0	0	0	0	0.15	0.19	0	0.2	0.19	0	0	0	0.2	0	0.27	0	0	0.22	0
PA14_RS13495 →:2,898,657:L9V (CTG→GTG) ‡	PA14_RS13495	PA14_33110		hypothetical protein	0.15	0	0	0	0	0	0	0	-0.19	0	0	0	0.15	0	0	0	0	0	0	0	0	0	0	0.19	0	0	0
PA14_RS26085 ←:5,685,933:P8R (CCG→CGG)	PA14_RS26085	PA14_63780		hypothetical protein	0.15	0	0	0	0	-0.12	0	0	0	0	0	0	0.15	0	0	0	0	0.12	0	0	0	0	0	0	0	0	0
PA14_RS29770 ← / ← PA14_RS29775:6,512,677:intergenic (‑148/+16)	PA14_RS29770	PA14_73120		hypothetical protein	0.15	0	0	0	0.13	-0.14	-0.02	0	-0.13	0	0	0	0.15	0	0	0	0	0.14	0	0.13	0	0.14	0	0.13	0.12	0	0
PA14_RS19140 ←:4,195,229:Q235P (CAG→CCG)	PA14_RS19140	PA14_47090		protease	0.15	-0.13	0	0.15	0	0	0	0	0	0	0.13	0	0.15	0	0	0	0	0	0.15	0	0	0	0	0	0	0	0
PA14_RS29770 ← / ← PA14_RS29775:6,512,667:intergenic (‑138/+26)	PA14_RS29770	PA14_73120		hypothetical protein	0.15	0.15	-0.13	0.14	-0.16	-0.15	0.14	0.12	0	0	0	0.13	0.15	0.15	0	0	0.16	0.15	0.14	0	0	0	0	0	0.14	0.12	0
PA14_RS17415 ←:3,811,300:T64P (ACG→CCG)	PA14_RS17415	PA14_42880	stk1	Stk1	0.14	0	0	0	0	0	0.17	0	0.08	0	0	0	0.14	0	0	0	0	0	0	0	0	0	0	0.12	0.17	0	0.2
PA14_RS08450 ←:1,814,375:P767P (CCG→CCC)	PA14_RS08450	PA14_21020		non-ribosomal peptide synthetase	0.14	0	0.22	0.16	0	-0.18	-0.13	0	0.18	0	0	0	0.14	0	0.22	0	0	0.18	0.16	0	0	0.13	0	0	0	0	0.18
PA14_RS04150 ←:883,873:A138G (GCG→GGG)	PA14_RS04150	PA14_10260		dehydrogenase E1 component	0.14	0.11	0	0	0	0	0	-0.14	0	0	0	0	0.14	0.11	0	0	0	0	0	0	0	0	0.14	0	0	0	0
PA14_RS07265 →:1,553,057:L358H (CTC→CAC)	PA14_RS07265	PA14_18090		major facilitator subfamily transporter protein	0.14	0	0	0	0	0	0	0	0	0	0	0	0.14	0	0	0	0	0	0	0	0	0	0	0	0	0	0
PA14_RS25800 → / → speD:5,633,339:intergenic (+158/‑171)	PA14_RS25800	PA14_63100		ferredoxin	0.14	0	0	0	0	0	0	0	0	0	0	0	0.14	0	0	0	0	0	0	0	0	0	0	0	0	0	0
PA14_RS18780 → / ← PA14_RS18785:4,117,807:intergenic (+20/+112)	PA14_RS18780	PA14_46280		hypothetical protein	0.14	0	-0.1	-0.1	0.1	0	0	0.16	0	0	0	0.1	0.14	0	0	0.1	0	0	0	0.1	0	0	0	0	0	0.16	0
PA14_RS09370 ← / ← gltS:2,006,562:intergenic (‑216/+13)	PA14_RS09370	PA14_23130		sensory box GGDEF domain-containing protein	0.14	0	-0.14	0.16	0	0.14	0	0	0	0	0	0.14	0.14	0	0	0	0	0	0.16	0	0.14	0	0	0	0	0	0
PA14_RS22565 ←:4,916,636:P35P (CCT→CCA)	PA14_RS22565	PA14_55380		hypothetical protein	0.14	0	-0.16	-0.1	0	-0.04	-0.14	-0.14	-0.11	0	0	0.16	0.14	0	0	0.1	0.12	0.15	0	0.12	0.11	0.14	0.14	0.11	0	0	0
PA14_RS23310 →:5,094,066:S138R (AGC→CGC)	PA14_RS23310	PA14_57180		hypothetical protein	0.14	-0.08	-0.21	0.05	-0.15	-0.04	0.01	0.09	0.1	0.38	0.54	0.49	0.52	0.46	0.28	0.36	0.58	0.46	0.41	0.43	0.42	0.5	0.37	0.37	0.51	0.46	0.47
PA14_RS23795 → / → PA14_RS23800:5,196,718:intergenic (+36/‑58)	PA14_RS23795	PA14_58350	dppA1	dipeptide ABC transporter substrate-binding protein DppA1	0.13	0.13	0.04	0	-0.08	0.09	0.14	0.01	0.03	0	0	0.08	0.13	0.13	0.12	0	0.08	0	0	0	0.09	0	0.11	0.1	0.14	0.12	0.13
PA14_RS03890 → / ← PA14_RS03895:826,053:intergenic (+29/+11)	PA14_RS03890	PA14_09600	ddlA	D-alanine--D-alanine ligase	0.13	-0.05	0.01	0.04	0.04	-0.05	-0.04	0.09	0.01	0.25	0.3	0.28	0.38	0.25	0.29	0.25	0.26	0.27	0.29	0.3	0.22	0.29	0.27	0.25	0.25	0.36	0.26
PA14_RS14185 →:3,100,514:E1243A (GAG→GCG)	PA14_RS14185	PA14_34840		non-ribosomal peptide synthetase	0.13	-0.17	0.13	0.12	0.01	0	0	-0.09	0	0	0.17	0	0.13	0	0.13	0	0.11	0	0.12	0.12	0	0	0.09	0	0	0	0
PA14_RS12455 →:2,644,940:L153R (CTG→CGG)	PA14_RS12455	PA14_30550		periplasmic aliphatic sulfonate-binding protein	0.13	-0.03	0.02	-0.03	0.05	0.05	0	0	0.14	0	0.17	0.1	0.13	0.14	0.12	0.13	0.09	0.11	0.1	0.14	0.16	0	0.09	0	0	0.09	0.14
PA14_RS05500 ←:1,175,256:I17F (ATC→TTC)	PA14_RS05500	PA14_13670		hypothetical protein	0.13	0	0	0	0	0	0	0	0	0	0	0	0.13	0	0	0	0	0	0	0	0	0	0	0	0	0	0
PA14_RS07910 →:1,702,091:G66R (GGC→CGC)	PA14_RS07910	PA14_19730		oxidoreductase	0.13	0	0	0	0	0	0	0	0	0	0	0	0.13	0	0	0	0	0	0	0	0	0	0	0	0	0	0
PA14_RS10085 ← / ← mobA:2,174,621:intergenic (‑81/+51)	PA14_RS10085	PA14_24880		lipoprotein	0.13	0	0	0	0	-0.07	0	0.09	0	0	0	0	0.13	0	0	0	0	0.07	0	0	0	0	0	0	0	0.09	0
PA14_RS08450 ←:1,814,374:I768L (ATC→CTC)	PA14_RS08450	PA14_21020		non-ribosomal peptide synthetase	0.13	-0.15	-0.15	0.16	0	0	-0.15	-0.05	0.01	0	0.15	0.15	0.13	0	0	0	0	0	0.16	0	0	0.15	0.15	0.13	0	0.1	0.14
PA14_RS08185 →:1,757,396:E321D (GAG→GAC)	PA14_RS08185	PA14_20430	phnM	phosphonate metabolism protein	0.12	0	0.13	0	0	0	0	-0.13	0	0	0	0	0.12	0	0.13	0	0	0	0	0	0	0	0.13	0	0	0	0
PA14_RS08420 ←:1,804,244:L99V (TTG→GTG)	PA14_RS08420	PA14_20950	fabH2	3-oxoacyl-ACP synthase	0.12	0	0	0	0	0	-0.14	0.01	0	0	0	0	0.12	0	0	0	0	0	0	0	0	0.14	0.11	0	0	0.12	0
PA14_RS08345 → / → PA14_RS08350:1,787,290:intergenic (+51/‑264)	PA14_RS08345	PA14_20760		chemotaxis protein methyltransferase	0.12	0	0.13	-0.21	0.27	-0.23	-0.08	-0.14	0.02	0.13	0	0	0.25	0	0.13	0.21	0	0.23	0	0.27	0	0.28	0.33	0.24	0.2	0.19	0.26
PA14_RS19765 ←:4,328,822:Q487P (CAG→CCG)	PA14_RS19765	PA14_48680		hypothetical protein	0.12	0	0.12	0	0	0	0	0.09	0	0	0	0	0.12	0	0.12	0	0	0	0	0	0	0	0	0	0	0.09	0
eat ← / ← PA14_RS04780:1,022,421:intergenic (‑173/+37)	PA14_RS04780	PA14_11810		aldehyde dehydrogenase	0.12	-0.02	0.04	-0.04	-0.03	-0.03	0.04	-0.08	0.03	0.13	0.24	0.13	0.25	0.22	0.17	0.21	0.3	0.26	0.17	0.27	0.23	0.2	0.29	0.2	0.24	0.21	0.23
PA14_RS09370 ← / ← gltS:2,006,556:intergenic (‑210/+19)	PA14_RS09370	PA14_23130		sensory box GGDEF domain-containing protein	0.12	0.13	0	0	0	0	0	0	-0.11	0	0	0	0.12	0.13	0	0	0	0	0	0	0	0	0	0.11	0	0	0
PA14_RS03155 →:680,483:R185P (CGC→CCC)	PA14_RS03155	PA14_07890		ABC transporter permease	0.12	0	0	0	0	0.11	0	0	0	0	0	0	0.12	0	0	0	0	0	0	0	0.11	0	0	0	0	0	0
PA14_RS05000 ← / ← hemL:1,066,292:intergenic (‑190/+19)	PA14_RS05000	PA14_12370		hypothetical protein	0.12	0	0	0	-0.13	-0.03	0	0	-0.11	0	0	0	0.12	0	0	0	0.13	0.13	0	0	0.1	0	0	0.11	0	0	0
PA14_RS14185 →:3,097,129:A115P (GCA→CCA)	PA14_RS14185	PA14_34840		non-ribosomal peptide synthetase	0.12	0	0	0	0	0	0	-0.1	0	0	0	0	0.12	0	0	0	0	0.1	0	0	0.1	0	0.1	0	0	0	0
PA14_RS18955 ←:4,158,323:K276N (AAA→AAC)	PA14_RS18955	PA14_46650		transmembrane sensor	0.12	0	0	0	0	0	0	0.03	0	0	0	0	0.12	0	0	0	0	0	0	0	0	0	0.1	0	0	0.13	0
PA14_RS24925 ←:5,442,589:M1M (ATG→TTG) †	PA14_RS24925	PA14_61020		hypothetical protein	0.12	0	0	0	0	0	-0.07	0	0	0	0	0	0.12	0	0	0	0	0	0	0	0	0.07	0	0	0	0	0
PA14_RS26485 ←:5,772,762:T439T (ACG→ACC)	PA14_RS26485	PA14_64790		MFS transporter	0.12	0	0	0	0	0	0	0	0	0	0	0	0.12	0	0	0	0	0	0	0	0	0	0	0	0	0	0
tadZ ←:4,991,520:A99P (GCG→CCG) ‡	tadZ				0.11	0.07	0	0	0	0	0	0	-0.09	0	0	0	0.11	0.07	0	0	0	0	0	0	0	0	0	0.09	0	0	0
ltaE ←:4,664,979:R307R (CGT→CGG)	ltaE				0.11	0	0	-0.12	0	-0.11	0	0	0	0	0	0	0.11	0	0	0.12	0	0.11	0	0	0	0	0	0	0	0	0
PA14_RS06615 →:1,413,834:D226A (GAC→GCC)	PA14_RS06615	PA14_16500	wspR	two-component response regulator	0.11	0	0	0	-0.11	0	0	-0.07	0	0	0	0	0.11	0	0	0	0.11	0	0	0	0	0	0.07	0	0	0	0
PA14_RS13650 →:2,948,755:L405R (CTC→CGC)	PA14_RS13650	PA14_33500	pvdH	diaminobutyrate--2-oxoglutarate aminotransferase	0.11	0.03	0.16	-0.04	0	-0.1	-0.01	-0.14	-0.1	0	0.1	0	0.11	0.13	0.16	0.12	0	0.1	0.08	0	0	0.12	0.14	0.1	0.11	0	0
PA14_RS22835 → / ← PA14_RS22840:4,996,791:intergenic (+83/+21)	PA14_RS22835	PA14_55960	pctC	chemotactic transducer PctC	0.11	0	0	0	0	0	0	0	0	0	0	0	0.11	0	0	0	0	0	0	0	0	0	0	0	0	0	0
PA14_RS04945 ← / ← PA14_RS04950:1,054,709:intergenic (‑27/+11)	PA14_RS04945	PA14_12200	holA	DNA polymerase III subunit delta	0.11	0	0	0	0	0	0	0	0	0	0	0	0.11	0	0	0	0	0	0	0	0	0	0	0	0	0	0
PA14_RS15080 ← / ← PA14_RS15085:3,300,302:intergenic (‑39/+49)	PA14_RS15080	PA14_37040	cupA2	chaperone CupA2	0.11	0	0	0	0	0	0	0	0	0	0	0	0.11	0	0	0	0	0	0	0	0	0	0	0	0	0	0
PA14_RS02190 →:475,857:E2332* (GAA→TAA)	PA14_RS02190	PA14_05390	chpA	ChpA	0.11	0	0	0	0	0	0	0	0	0	0	0	0.11	0	0	0	0	0	0	0	0	0	0	0	0	0	0
PA14_RS05280 →:1,128,120:S636T (AGC→ACC)	PA14_RS05280	PA14_13130		hypothetical protein	0.11	0.11	0	0	0	0	0	0	0	0	0	0	0.11	0.11	0	0	0	0	0	0	0	0	0	0	0	0	0
PA14_RS11045 → / ← PA14_RS11050:2,370,362:intergenic (+8/+33)	PA14_RS11045	PA14_27310		hypothetical protein	0.11	0	0	0	0	0	0	0	0	0	0	0	0.11	0	0	0	0	0	0	0	0	0	0	0	0	0	0
PA14_RS13035 ←:2,771,175:V208V (GTC→GTG)	PA14_RS13035	PA14_31850		hypothetical protein	0.11	0	0	0	0	-0.09	0	0	0.12	0	0	0	0.11	0	0	0	0	0.09	0	0	0	0	0	0	0	0	0.12
PA14_RS13495 →:2,898,658:L9R (CTG→CGG) ‡	PA14_RS13495	PA14_33110		hypothetical protein	0.11	0	0	0	0	0	0	0	-0.1	0	0	0	0.11	0	0	0	0	0	0	0	0	0	0	0.1	0	0	0
PA14_RS14745 ←:3,229,455:M250R (ATG→AGG) ‡	PA14_RS14745	PA14_36260		signal transduction protein	0.11	0	0	-0.11	0	0.05	0	0	0	0	0	0	0.11	0	0	0.11	0	0.09	0	0	0.14	0	0	0	0	0	0
PA14_RS09065 → / → PA14_RS09070:1,950,428:intergenic (+60/‑217)	PA14_RS09065	PA14_22400		hypothetical protein	0.11	-0.1	-0.06	0	0	0	0	-0.09	-0.1	0	0.1	0.06	0.11	0	0	0	0	0	0	0	0	0	0.09	0.1	0	0	0
PA14_RS22380 ← / ← PA14_RS22385:4,878,767:intergenic (‑232/+22)	PA14_RS22380				0.1	0	0.11	-0.07	0	0	0	0	0	0	0	0	0.1	0	0.11	0.07	0	0	0	0	0	0	0	0	0	0	0
sulA ←:2,200,372:A153P (GCA→CCA)	sulA		sulA		0.1	0.01	0.02	-0.02	-0.02	-0.02	-0.04	0.03	-0.01	0	0.1	0.1	0.1	0.11	0.12	0.09	0.11	0.13	0.07	0.09	0.11	0.11	0.08	0.12	0.07	0.11	0.11
trbL → / → PA14_RS06215:1,316,001:intergenic (+13/‑54)	PA14_RS06215				0.1	0	-0.01	0.12	0	0	0	0	0	0	0	0.07	0.1	0	0.06	0	0	0	0.12	0	0	0	0	0	0	0	0
mnmC ←:1,678,028:P237P (CCG→CCT)	mnmC	PA14_19400	mnmC	5-methylaminomethyl-2-thiouridine methyltransferase	0.1	0	0	0	0	0	0	0	0	0	0	0	0.1	0	0	0	0	0	0	0	0	0	0	0	0	0	0
PA14_RS01935 ←:422,060:S512W (TCG→TGG)	PA14_RS01935	PA14_04780	laoA	LaoA	0.1	0	0	0	0	0	0	-0.09	0	0	0	0	0.1	0	0	0	0	0	0	0	0	0	0.09	0	0	0	0
ilvC ←:5,544,387:*339Y (TAA→TAC)	ilvC	PA14_62130	ilvC	ketol-acid reductoisomerase	0.1	0	0	0	0	0	0	0	-0.06	0	0	0	0.1	0	0	0	0	0	0	0	0	0	0	0.06	0	0	0
folC →:2,076,702:A369P (GCG→CCG)	folC	PA14_23880	folC	folylpolyglutamate synthetase	0.1	0	-0.01	0	-0.17	0.03	0.04	-0.01	-0.05	0	0.13	0.15	0.1	0.13	0.14	0.14	0.17	0.14	0.14	0	0.17	0.09	0.16	0.19	0.13	0.15	0.14
argJ ← / ← secA:5,097,331:intergenic (‑54/+93)	argJ	PA14_57210	argJ	bifunctional ornithine acetyltransferase/N-acetylglutamate synthase	0.1	0	0	0	0	-0.07	0	0.1	0	0	0	0	0.1	0	0	0	0	0.07	0	0	0	0	0	0	0	0.1	0
PA14_RS05145 →:1,094,334:K426T (AAG→ACG)	PA14_RS05145	PA14_12760		ATP-dependent RNA helicase	0.1	0	0.09	0	0	0.06	0	-0.08	0	0	0	0	0.1	0	0.09	0	0	0	0	0	0.06	0	0.08	0	0	0	0
PA14_RS11120 ← / ← PA14_RS11125:2,387,020:intergenic (‑37/+14)	PA14_RS11120	PA14_27490		hypothetical protein	0.1	0.08	0.01	-0.05	-0.29	-0.4	-0.02	0.13	-0.09	0.23	0.22	0.19	0.33	0.3	0.2	0.32	0.29	0.4	0.27	0	0	0.32	0.25	0.31	0.3	0.38	0.22
PA14_RS14185 →:3,098,224:R480G (CGC→GGC)	PA14_RS14185	PA14_34840		non-ribosomal peptide synthetase	0.1	0	0	0	0	0	0	0	0	0	0	0	0.1	0	0	0	0	0	0	0	0	0	0	0	0	0	0
PA14_RS14185 →:3,098,229:A481A (GCG→GCC)	PA14_RS14185	PA14_34840		non-ribosomal peptide synthetase	0.1	0	0	0	0	0	0	0	0	0	0	0	0.1	0	0	0	0	0	0	0	0	0	0	0	0	0	0
PA14_RS16325 ←:3,594,225:G830G (GGC→GGG)	PA14_RS16325	PA14_40260		hypothetical protein	0.1	0	0	0	0	0	0.09	0	0	0	0	0	0.1	0	0	0	0	0	0	0	0	0	0	0	0.09	0	0
PA14_RS17950 ←:3,931,238:I234F (ATC→TTC)	PA14_RS17950	PA14_44180		LysR family transcriptional regulator	0.1	0	0	0	0	0	0	0	0	0	0	0	0.1	0	0	0	0	0	0	0	0	0	0	0	0	0	0
PA14_RS21930 ←:4,774,809:A207A (GCG→GCC)	PA14_RS21930	PA14_53850		oxidoreductase	0.1	0	0	0	0.09	-0.14	0	-0.11	0	0	0	0	0.1	0	0	0	0	0.14	0	0.09	0	0	0.11	0	0	0	0
PA14_RS24980 ←:5,453,091:F546C (TTC→TGC)	PA14_RS24980	PA14_61150		oxidoreductase	0.1	0	0	0	0	0	0	0	0	0	0	0	0.1	0	0	0	0	0	0	0	0	0	0	0	0	0	0
PA14_RS29430 → / ← PA14_RS29435:6,441,749:intergenic (+8/+11)	PA14_RS29430	PA14_72300		hypothetical protein	0.1	0	0	0.09	-0.07	0	0	0	0	0	0	0	0.1	0	0	0	0.07	0	0.09	0	0	0	0	0	0	0	0
PA14_RS07945 →:1,711,050:L367V (CTG→GTG)	PA14_RS07945	PA14_19850		transcriptional regulator	0.1	-0.08	0	0	0	0	0	-0.09	0	0	0.08	0	0.1	0	0	0	0	0	0	0	0	0	0.09	0	0	0	0
PA14_RS28965 ←:6,337,628:R47G (CGC→GGC)	PA14_RS28965	PA14_71140		3-hydroxybutyryl-CoA dehydrogenase	0.1	-0.12	0	-0.13	0	-0.11	0.13	0	-0.12	0	0.12	0.09	0.1	0	0.09	0.13	0	0.11	0	0	0	0	0	0.12	0.13	0	0
PA14_RS00970 →:215,996:A30G (GCG→GGG)	PA14_RS00970	PA14_02410		TonB-dependent receptor	0.1	0	-0.03	0.1	-0.02	-0.02	-0.12	-0.02	0.02	0	0	0.11	0.1	0	0.08	0	0.13	0.12	0.1	0.11	0.1	0.12	0.11	0.07	0	0.09	0.09
PA14_RS26085 ←:5,685,937:R7G (CGC→GGC)	PA14_RS26085	PA14_63780		hypothetical protein	0.1	-0.01	-0.07	-0.02	0.05	-0.12	0.07	0.02	0.04	0	0.13	0.14	0.1	0.12	0.07	0.14	0.09	0.12	0.12	0.14	0	0	0.11	0.12	0.07	0.13	0.16
gspD ←:4,936,995:A121P (GCC→CCC)	gspD				0.09	-0.11	0	0.08	0	-0.08	0	-0.1	0	0	0.11	0	0.09	0	0	0	0	0.08	0.08	0	0	0	0.1	0	0	0	0
dgcB →:6,351,756:P266P (CCG→CCC)	dgcB				0.09	0.08	-0.1	0.05	0.02	0	-0.1	-0.17	-0.03	0	0.11	0.1	0.09	0.19	0	0.06	0.14	0.12	0.11	0.16	0.12	0.17	0.17	0.17	0.07	0	0.14
phoU ← / ← PA14_RS28840:6,306,114:intergenic (‑80/+16)	PA14_RS28840	PA14_70810	pstB	phosphate transporter ATP-binding protein	0.09	0	0	0	0	0	0	0	0	0	0	0	0.09	0	0	0	0	0	0	0	0	0	0	0	0	0	0
prpC → / → acnD:4,784,412:intergenic (+11/‑120)	prpC	PA14_53950	prpC	methylcitrate synthase	0.09	0	0	0	-0.07	0	0	0	0.09	0	0	0	0.09	0	0	0	0.07	0	0	0	0	0	0	0	0	0	0.09
PA14_RS20875 →:4,563,736:F300L (TTC→TTG)	PA14_RS20875	PA14_51340	mvfR	transcriptional regulator MvfR	0.09	0	-0.09	0	0	0	0.08	-0.01	0	0	0	0.09	0.09	0	0	0	0	0	0	0	0	0	0.1	0	0.08	0.09	0
hrpA → / ← phoA:1,856,260:intergenic (+60/+13)	hrpA	PA14_21400	hrpA	ATP-dependent helicase	0.09	0	0	0	0	0	0	0	0	0	0	0	0.09	0	0	0	0	0	0	0	0	0	0	0	0	0	0
folC →:2,076,696:P367A (CCG→GCG)	folC	PA14_23880	folC	folylpolyglutamate synthetase	0.09	0	0	0	0	0	0	0	-0.16	0	0	0	0.09	0	0	0	0	0	0	0	0	0	0	0.16	0	0	0
PA14_RS15080 ← / ← PA14_RS15085:3,300,309:intergenic (‑46/+42)	PA14_RS15080	PA14_37040	cupA2	chaperone CupA2	0.09	0	0	0	0	0	0	0.09	0	0	0	0	0.09	0	0	0	0	0	0	0	0	0	0	0	0	0.09	0
PA14_RS28245 ←:6,181,433:K360T (AAG→ACG)	PA14_RS28245	PA14_69300		hypothetical protein	0.09	0	0.08	0	0	0	-0.07	0	0	0	0	0	0.09	0	0.08	0	0	0	0	0	0	0.07	0	0	0	0	0
PA14_RS23860 ←:5,210,874:*310G (TGA→GGA)	PA14_RS23860	PA14_58515		hypothetical protein	0.09	0.15	0	0	0.01	0	0.01	0.01	-0.02	0	0	0	0.09	0.15	0	0	0.1	0.11	0	0.11	0.11	0.07	0.07	0.1	0.08	0.08	0.08
PA14_RS13265 →:2,824,844:V17G (GTG→GGG)	PA14_RS13265	PA14_32520		hypothetical protein	0.09	0.02	0	0.03	-0.09	0.01	0	0.02	-0.09	0	0.13	0.11	0.09	0.15	0.11	0.11	0.09	0.1	0.14	0	0.11	0	0.11	0.09	0	0.13	0
PA14_RS05365 → / ← PA14_RS05370:1,148,642:intergenic (+42/+280)	PA14_RS05365	PA14_13340		extracellular nuclease	0.09	0	0	0	0	0	-0.11	0	-0.02	0	0	0	0.09	0	0	0	0	0	0	0	0	0.11	0	0.1	0	0	0.08
PA14_RS07340 ←:1,569,793:G349G (GGC→GGG)	PA14_RS07340	PA14_18300		nucleotide sugar dehydrogenase	0.09	0	0	0	0	0	0	0	0	0	0	0	0.09	0	0	0	0	0	0	0	0	0	0	0	0	0	0
PA14_RS08825 →:1,900,079:D85V (GAT→GTT)	PA14_RS08825	PA14_21860		hypothetical protein	0.09	0	0	0	0	0.09	0	0	0	0	0	0	0.09	0	0	0	0	0	0	0	0.09	0	0	0	0	0	0
PA14_RS12750 → / ← PA14_RS12755:2,709,549:intergenic (+366/+28)	PA14_RS12750	PA14_31160		hypothetical protein	0.09	0	0	0	0	0	0	0	0	0	0	0	0.09	0	0	0	0	0	0	0	0	0	0	0	0	0	0
PA14_RS19020 ←:4,168,592:E393V (GAG→GTG)	PA14_RS19020	PA14_46810		RNA polymerase ECF-subfamily sigma-70 factor	0.09	0	0	0	0	0	0	0	0	0	0	0	0.09	0	0	0	0	0	0	0	0	0	0	0	0	0	0
PA14_RS23855 →:5,210,865:*158G (TGA→GGA)	PA14_RS23855	PA14_58510		AsnC family transcriptional regulator	0.09	0	0	0	0	0	-0.07	0	0	0	0	0	0.09	0	0	0	0	0	0	0	0	0.07	0	0	0	0	0
PA14_RS14085 ← / ← PA14_RS31415:3,075,421:intergenic (‑133/+32)	PA14_RS14085	PA14_34600		glyceraldehyde-3-phosphate dehydrogenase	0.09	-0.12	0	0.12	0	0.09	0	0	-0.14	0	0.12	0	0.09	0	0	0	0	0	0.12	0	0.09	0	0	0.14	0	0	0
PA14_RS23285 ← / ← PA14_RS23290:5,088,775:intergenic (‑136/+97)	PA14_RS23285	PA14_57110		hypothetical protein	0.09	-0.12	0	-0.1	0	0	-0.08	0	0	0	0.12	0	0.09	0	0	0.1	0	0	0	0	0	0.08	0	0	0	0	0
PA14_RS05280 →:1,128,139:*642C (TGA→TGT)	PA14_RS05280	PA14_13130		hypothetical protein	0.09	0	-0.09	-0.09	0	-0.1	0	0	0	0	0	0.09	0.09	0	0	0.09	0	0.1	0	0	0	0	0	0	0	0	0
PA14_RS28530 ←:6,245,153:K100N (AAG→AAC)	PA14_RS28530	PA14_70010		hypothetical protein	0.09	-0.07	-0.09	0	-0.1	0	0.1	0	0.07	0	0.07	0.09	0.09	0	0	0	0.1	0	0	0	0	0	0	0	0.1	0	0.07
guaD ← / → PA14_RS00690:151,319:intergenic (‑96/‑1062)	PA14_RS00690	PA14_01670		ABC transporter ATP-binding protein	0.09	0	-0.1	0	0	0	0	-0.1	-0.08	0	0	0.1	0.09	0	0	0	0	0	0	0	0	0	0.1	0.08	0	0	0
PA14_RS17375 →:3,805,124:Q7H (CAA→CAC)	PA14_RS17375	PA14_42780		hypothetical protein	0.09	0	-0.1	0	0	0	0	0.09	-0.1	0	0	0.1	0.09	0	0	0	0	0	0	0	0	0	0	0.1	0	0.09	0
PA14_RS09055 →:1,949,343:Q555H (CAA→CAC)	PA14_RS09055	PA14_22370		hypothetical protein	0.09	0.08	-0.12	-0.02	-0.03	0.01	0.07	-0.08	-0.07	0	0	0.12	0.09	0.08	0	0.1	0.13	0.06	0.08	0.1	0.07	0	0.08	0.07	0.07	0	0
scpB → / → PA14_RS09270:1,984,641:intergenic (+42/‑40)	PA14_RS09270	PA14_22870		hypothetical protein	0.08	-0.05	0.06	0.03	0	0.12	0.04	-0.01	-0.05	0.12	0.18	0.1	0.2	0.13	0.16	0.11	0	0	0.14	0	0.12	0.17	0.2	0.18	0.21	0.19	0.13
PA14_RS28935 → / ← PA14_RS28940:6,332,721:intergenic (+26/+20)	PA14_RS28935	PA14_71070		AraC family transcriptional regulator	0.08	0.02	-0.01	-0.02	0.04	-0.05	-0.07	0.03	-0.02	0.12	0.13	0.16	0.2	0.15	0.15	0.18	0.15	0.18	0.16	0.19	0.13	0.19	0.16	0.15	0.12	0.19	0.13
PA14_RS11305 ←:2,414,958:R125R (CGA→CGC)	PA14_RS11305	PA14_27890		hypothetical protein	0.08	0.08	-0.02	0.06	0.46	-0.03	0.1	0.07	-0.12	0.38	0.39	0.37	0.46	0.47	0.35	0.3	0	0.37	0.36	0.46	0.34	0.29	0.29	0.4	0.39	0.36	0.28
PA14_RS13175 →:2,807,680:W275G (TGG→GGG)	PA14_RS13175	PA14_32300		kinase	0.08	0.03	-0.23	0.03	-0.29	-0.2	-0.19	0.05	0.11	0.19	0.26	0.23	0.27	0.29	0	0.24	0.29	0.2	0.27	0	0	0.19	0.21	0.23	0	0.26	0.34
dgcB →:6,351,788:L277R (CTG→CGG)	dgcB				0.08	0	0	0	0	0	0	0	0	0	0	0	0.08	0	0	0	0	0	0	0	0	0	0	0	0	0	0
piv ←:850,134:V416G (GTC→GGC)	piv				0.08	0	0	0	0	0	0.07	0.07	0.05	0	0	0	0.08	0	0	0	0	0	0	0	0	0	0	0	0.07	0.07	0.05
rcpA ←:4,992,371:L235R (CTC→CGC)	rcpA				0.08	0	0	0	0	0	0	0	0	0	0	0	0.08	0	0	0	0	0	0	0	0	0	0	0	0	0	0
cra ←:1,563,281:R37R (CGC→CGG)	cra				0.08	-0.1	0	0	-0.13	0	0.08	0.02	0.09	0	0.1	0	0.08	0	0	0	0.13	0.09	0	0	0.09	0	0.12	0.05	0.08	0.14	0.14
PA14_RS09665 →:2,074,443:R207G (CGC→GGC)	PA14_RS09665	PA14_23850	trpF	N-(5'-phosphoribosyl)anthranilate isomerase	0.08	0	0	0	0	0.09	0	0	0	0	0	0	0.08	0	0	0	0	0	0	0	0.09	0	0	0	0	0	0
trkA ←:17,639:G375A (GGC→GCC)	trkA	PA14_00170	trkA	potassium transporter peripheral membrane protein	0.08	0	0	0	0	0	0	0	0	0	0	0	0.08	0	0	0	0	0	0	0	0	0	0	0	0	0	0
PA14_RS29520 → / ← PA14_RS29525:6,461,057:intergenic (+269/+347)	PA14_RS29520	PA14_72510	thrB	homoserine kinase	0.08	-0.12	0	0.04	-0.08	0	-0.05	0	-0.01	0	0.12	0	0.08	0	0	0.06	0.08	0	0.1	0	0	0.13	0.09	0.1	0.08	0.09	0.09
phoB → / → phoR:6,300,430:intergenic (+43/‑30)	phoB	PA14_70750	phoB	two-component response regulator PhoB	0.08	0	0	0	0	0	0	0	0	0	0	0	0.08	0	0	0	0	0	0	0	0	0	0	0	0	0	0
gltB ←:5,940,782:L921Q (CTG→CAG)	gltB	PA14_66570	gltB	glutamate synthase subunit alpha	0.08	0	0	0	0	0	0	0	0	0	0	0	0.08	0	0	0	0	0	0	0	0	0	0	0	0	0	0
folC →:2,076,712:E372V (GAG→GTG)	folC	PA14_23880	folC	folylpolyglutamate synthetase	0.08	0	0	0	0	0	0	0	0	0	0	0	0.08	0	0	0	0	0	0	0	0	0	0	0	0	0	0
PA14_RS04180 ←:891,333:W76G (TGG→GGG)	PA14_RS04180	PA14_10330		outer membrane protein	0.08	0	0.11	0	0	0.02	0.11	0	-0.08	0	0	0	0.08	0	0.11	0	0	0.07	0	0	0.09	0	0	0.08	0.11	0	0
PA14_RS28740 → / ← PA14_RS28745:6,289,505:intergenic (+36/+36)	PA14_RS28740	PA14_70580		hypothetical protein	0.08	-0.11	0.06	0	0.1	-0.08	0	0.07	-0.08	0	0.11	0	0.08	0	0.06	0	0	0.08	0	0.1	0	0	0	0.08	0	0.07	0
gdhA ← / ← PA14_RS24805:5,411,491:intergenic (‑269/+27)	PA14_RS24805	PA14_60730		outer membrane protein	0.08	-0.13	0.05	0.05	0.14	-0.01	-0.01	0.03	0.03	0.11	0.13	0.15	0.19	0	0.2	0.12	0	0.15	0.17	0.14	0.14	0.15	0.16	0.16	0.14	0.19	0.19
PA14_RS19935 ← / ← PA14_RS19940:4,360,339:intergenic (‑63/+39)	PA14_RS19935	PA14_49080		acyl-CoA dehydrogenase	0.08	0.11	0	0	0	0	0	0	0	0	0	0	0.08	0.11	0	0	0	0	0	0	0	0	0	0	0	0	0
PA14_RS10070 → / → PA14_RS10075:2,172,546:intergenic (+285/‑82)	PA14_RS10070	PA14_24850		hypothetical protein	0.08	0.03	0	-0.09	-0.03	-0.08	0	0	0.11	0	0.06	0	0.08	0.09	0	0.09	0.11	0.08	0	0.08	0	0.09	0.07	0	0.09	0.07	0.11
PA14_RS00620 → / ← PA14_RS00625:140,254:intergenic (+13/+19)	PA14_RS00620	PA14_01490		hemolysin	0.08	0	0	0	0	0	0	0	0	0	0	0	0.08	0	0	0	0	0	0	0	0	0	0	0	0	0	0
PA14_RS01530 → / → PA14_RS01535:336,200:intergenic (+102/‑127)	PA14_RS01530	PA14_03730		fatty acid desaturase	0.08	0	0	0	0	0	0	0	0	0	0	0	0.08	0	0	0	0	0	0	0	0	0	0	0	0	0	0
PA14_RS07930 ←:1,705,975:D120V (GAC→GTC)	PA14_RS07930	PA14_19800		AraC family transcriptional regulator	0.08	0	0	0	0	0	0	0	0	0	0	0	0.08	0	0	0	0	0	0	0	0	0	0	0	0	0	0
PA14_RS11050 ←:2,371,589:R51R (CGG→CGC)	PA14_RS11050	PA14_27330		phospho-2-dehydro-3-deoxyheptonate aldolase	0.08	0	0	0.09	0	0	0	0	0	0	0	0	0.08	0	0	0	0	0	0.09	0	0	0	0	0	0	0	0
PA14_RS22550 ←:4,912,177:S207T (AGC→ACC)	PA14_RS22550	PA14_55330		hypothetical protein	0.08	0	0	0	0	0	0	0	0	0	0	0	0.08	0	0	0	0	0	0	0	0	0	0	0	0	0	0
PA14_RS29680 ← / ← PA14_RS29685:6,493,048:intergenic (‑126/+70)	PA14_RS29680	PA14_72920		hypothetical protein	0.08	0	0	0	0	0	0	0	0	0	0	0	0.08	0	0	0	0	0	0	0	0	0	0	0	0	0	0
PA14_RS27585 ←:6,041,756:L383V (CTG→GTG)	PA14_RS27585	PA14_67630		hypothetical protein	0.08	0.06	-0.06	0	-0.06	0	-0.01	0.09	0	0	0	0.06	0.08	0.06	0	0	0.06	0.08	0	0	0.08	0.06	0	0	0.05	0.09	0
PA14_RS09815 →:2,103,987:V265G (GTT→GGT)	PA14_RS09815	PA14_24240		hypothetical protein	0.08	0.01	-0.08	0.02	0.01	-0.02	-0.06	0.02	0.09	0	0.08	0.08	0.08	0.09	0	0.09	0.08	0.09	0.11	0.09	0.07	0.06	0.07	0	0	0.09	0.09
PA14_RS27585 ← / → PA14_RS27590:6,043,008:intergenic (‑106/‑182)	PA14_RS27585	PA14_67630		hypothetical protein	0.08	-0.02	-0.1	-0.01	0.05	0	0.03	-0.02	-0.08	0	0.09	0.1	0.08	0.07	0	0.08	0.05	0	0.07	0.1	0	0.09	0.12	0.08	0.12	0.1	0
benA →:2,792,345:I352L (ATC→CTC)	benA				0.08	0.01	-0.04	0.1	0	0.04	0.07	0.02	-0.02	0.13	0.12	0.17	0.21	0.13	0.13	0	0	0.13	0.1	0	0.17	0.11	0.15	0.19	0.18	0.17	0.17
PA14_RS00255 ← / → PA14_RS00260:63,013:intergenic (‑75/‑688)	PA14_RS00255	PA14_00620	0	hypothetical protein	0.08	-0.08	0.08	0.15	-0.01	0.05	0.05	-0.01	0.05	0.13	0.18	0.1	0.21	0.1	0.18	0	0.13	0.09	0.15	0.12	0.14	0.13	0.1	0.11	0.18	0.09	0.16
hemW ←:443,159:N106K (AAT→AAA)	hemW				0.07	0.08	0	0	0	0	0	0	0	0	0	0	0.07	0.08	0	0	0	0	0	0	0	0	0	0	0	0	0
PA14_RS22380 ← / ← PA14_RS22385:4,878,751:intergenic (‑216/+38)	PA14_RS22380				0.07	0	-0.08	-0.06	0.07	0	0.07	0	0	0	0	0.08	0.07	0	0	0.06	0	0	0	0.07	0	0	0	0	0.07	0	0
PA14_RS06615 →:1,413,776:M207L (ATG→TTG)	PA14_RS06615	PA14_16500	wspR	two-component response regulator	0.07	-0.08	0.08	0	0	0	0	0	-0.07	0	0.08	0	0.07	0	0.08	0	0	0	0	0	0	0	0	0.07	0	0	0
trkA ←:17,635:A376A (GCA→GCC)	trkA	PA14_00170	trkA	potassium transporter peripheral membrane protein	0.07	0	0	0	0.08	0	0	-0.07	0	0	0	0	0.07	0	0	0	0	0	0	0.08	0	0	0.07	0	0	0	0
toxA →:4,408,872:R478G (CGC→GGC)	toxA	PA14_49560	toxA	exotoxin A	0.07	0	0.09	0.06	-0.09	0	0	0.05	0	0	0	0	0.07	0	0.09	0	0.09	0	0.06	0	0	0	0	0	0	0.05	0
ssuD →:1,691,202:G302A (GGC→GCC)	ssuD	PA14_19560	ssuD	alkanesulfonate monooxygenase	0.07	0	0	0	0	0	0	0	0	0	0	0	0.07	0	0	0	0	0	0	0	0	0	0	0	0	0	0
mexH ←:820,079:M148L (ATG→TTG)	mexH	PA14_09530	mexH	RND efflux membrane fusion protein	0.07	0	0	0.09	0	0	0	0	0	0	0	0	0.07	0	0	0	0	0	0.09	0	0	0	0	0	0	0	0
PA14_RS26475 ←:5,771,155:L197H (CTC→CAC)	PA14_RS26475	PA14_64770	mdlC	benzoylformate decarboxylase	0.07	0	-0.08	0	0.1	0	-0.06	0.07	0.08	0	0	0.08	0.07	0	0	0	0	0	0	0.1	0	0.06	0	0	0	0.07	0.08
guaB →:1,298,375:D228A (GAT→GCT)	guaB	PA14_15310	guaB	inosine 5'-monophosphate dehydrogenase	0.07	0	0	0	0	0	0	0	0	0	0	0	0.07	0	0	0	0	0	0	0	0	0	0	0	0	0	0
fabB →:3,891,525:G303G (GGC→GGG)	fabB	PA14_43690	fabB	3-oxoacyl-ACP synthase	0.07	-0.11	0	-0.12	-0.11	0.12	0	0.11	0	0	0.11	0	0.07	0	0	0.12	0.11	0	0	0	0.12	0	0	0	0	0.11	0
PA14_RS07110 → / ← PA14_RS07115:1,520,117:intergenic (+53/+17)	PA14_RS07110	PA14_17675	dgkA	diacylglycerol kinase	0.07	0	0	0	0	0	0	0	0	0	0	0	0.07	0	0	0	0	0	0	0	0	0	0	0	0	0	0
PA14_RS03320 →:706,870:P195P (CCT→CCA)	PA14_RS03320	PA14_08270		hypothetical protein	0.07	0	0.08	0	0	0	-0.06	0	0	0	0	0	0.07	0	0.08	0	0	0	0	0	0	0.06	0	0	0	0	0
PA14_RS19215 → / ← PA14_RS19220:4,212,298:intergenic (+20/+31)	PA14_RS19215	PA14_47270		LysR family transcriptional regulator	0.07	0.23	0.06	0.15	0.2	0.15	0.01	-0.1	0.06	0.16	0	0.19	0.23	0.23	0.25	0	0	0	0.15	0.2	0.15	0.2	0.28	0.15	0.21	0.18	0.21
hydA ← / → PA14_RS02340:511,039:intergenic (‑33/‑583)	PA14_RS02340	PA14_05790		transporter	0.07	0	0.04	0	0.1	-0.07	0.1	0	0	0	0	0.06	0.07	0	0.1	0.07	0	0.07	0.07	0.1	0	0	0	0	0.1	0	0
PA14_RS28345 ← / ← PA14_RS28350:6,206,069:intergenic (‑174/+23)	PA14_RS28345	PA14_69550		hypothetical protein	0.07	0.04	0.03	-0.03	0.03	0.02	0.02	-0.01	-0.07	0.37	0.39	0.39	0.44	0.43	0.42	0.42	0.39	0.4	0.39	0.42	0.42	0.43	0.42	0.43	0.45	0.41	0.36
PA14_RS25505 →:5,567,483:G128A (GGC→GCC)	PA14_RS25505	PA14_62410		hypothetical protein	0.07	0.09	0	0	0	0	0	0	0	0.06	0	0	0.13	0.09	0	0	0	0	0	0	0	0	0	0	0	0	0
hydA ← / → PA14_RS02340:511,048:intergenic (‑42/‑574)	PA14_RS02340	PA14_05790		transporter	0.07	0	0	0	0.06	-0.05	0.06	0	0	0	0	0	0.07	0	0	0	0	0.05	0	0.06	0	0	0	0	0.06	0	0
hydA ← / → PA14_RS02340:511,049:intergenic (‑43/‑573)	PA14_RS02340	PA14_05790		transporter	0.07	0	0	0.11	0	0	0	0	-0.08	0	0	0	0.07	0	0	0	0	0	0.11	0	0	0	0	0.08	0	0	0
PA14_RS00730 ←:162,420:A281G (GCG→GGG)	PA14_RS00730	PA14_01770		nucleoside-binding outer membrane protein	0.07	0	0	0	0	0	0	0	0	0	0	0	0.07	0	0	0	0	0	0	0	0	0	0	0	0	0	0
PA14_RS01530 → / → PA14_RS01535:336,213:intergenic (+115/‑114)	PA14_RS01530	PA14_03730		fatty acid desaturase	0.07	0	0	0	0	0	0	0.06	0.07	0	0	0	0.07	0	0	0	0	0	0	0	0	0	0	0	0	0.06	0.07
PA14_RS04595 ←:986,978:L115Q (CTG→CAG)	PA14_RS04595	PA14_11350		hypothetical protein	0.07	0	0	0	0	0	0	0	0	0	0	0	0.07	0	0	0	0	0	0	0	0	0	0	0	0	0	0
PA14_RS08295 ←:1,777,617:M11R (ATG→AGG)	PA14_RS08295	PA14_20640		hypothetical protein	0.07	0	0	0	0	0	0	0	-0.06	0	0	0	0.07	0	0	0	0	0	0	0	0	0	0	0.06	0	0	0
PA14_RS13395 ←:2,871,692:R520H (CGC→CAC)	PA14_RS13395	PA14_32830		hypothetical protein	0.07	0	0	0	0	0	0	0	0	0	0	0	0.07	0	0	0	0	0	0	0	0	0	0	0	0	0	0
PA14_RS14745 ←:3,229,456:M250L (ATG→CTG) ‡	PA14_RS14745	PA14_36260		signal transduction protein	0.07	0	0	-0.11	0	0.01	0	0	0	0	0	0	0.07	0	0	0.11	0	0.07	0	0	0.08	0	0	0	0	0	0
PA14_RS15110 ←:3,306,432:R252R (CGC→CGG)	PA14_RS15110	PA14_37100		dehydrogenase	0.07	0	0	0	0	0	0	0	0	0	0	0	0.07	0	0	0	0	0	0	0	0	0	0	0	0	0	0
PA14_RS17370 → / → PA14_RS17375:3,805,094:intergenic (+68/‑10)	PA14_RS17370	PA14_42770		hypothetical protein	0.07	0	0	0	0	0	-0.05	0	-0.09	0	0	0	0.07	0	0	0	0	0	0	0	0	0.05	0	0.09	0	0	0
PA14_RS19325 →:4,232,698:S35T (TCC→ACC)	PA14_RS19325	PA14_47520		transcriptional regulator	0.07	0	0	0	0	0	0	0	0	0	0	0	0.07	0	0	0	0	0	0	0	0	0	0	0	0	0	0
PA14_RS24980 ←:5,453,107:I541F (ATT→TTT)	PA14_RS24980	PA14_61150		oxidoreductase	0.07	0	0	0	0	0	-0.06	0	0	0	0	0	0.07	0	0	0	0	0	0	0	0	0.06	0	0	0	0	0
PA14_RS27005 ←:5,893,456:A333G (GCG→GGG)	PA14_RS27005	PA14_66160		glycosyl transferase family protein	0.07	0	0	0	0	0	0	0	-0.06	0	0	0	0.07	0	0	0	0	0	0	0	0	0	0	0.06	0	0	0
PA14_RS28825 ←:6,303,907:R88G (CGG→GGG)	PA14_RS28825	PA14_70780		hypothetical protein	0.07	0	0	0	0	0	-0.08	0	-0.07	0	0	0	0.07	0	0	0	0	0	0	0	0	0.08	0	0.07	0	0	0
PA14_RS03275 →:700,878:A70A (GCG→GCT)	PA14_RS03275	PA14_08160		lytic enzyme	0.07	-0.01	0	0	-0.02	0	0	0	0	0	0.09	0	0.07	0.08	0	0	0.09	0.06	0	0.07	0.06	0	0	0	0	0	0
PA14_RS06825 → / ← PA14_RS06830:1,457,932:intergenic (+16/+35)	PA14_RS06825	PA14_17010		Na(+)/H(+) exchanger protein	0.07	-0.08	0	0	0	0	0	-0.08	0	0	0.08	0	0.07	0	0	0	0	0	0	0	0	0	0.08	0	0	0	0
PA14_RS05280 →:1,128,101:R630G (CGC→GGC)	PA14_RS05280	PA14_13130		hypothetical protein	0.07	-0.1	0	0	0	0	0	0	-0.11	0	0.1	0	0.07	0	0	0	0	0	0	0	0	0	0	0.11	0	0	0
PA14_RS02885 → / → PA14_RS02890:622,839:intergenic (+147/‑13)	PA14_RS02885	PA14_07200		hypothetical protein	0.07	0.06	-0.04	0.06	0.05	-0.03	0.05	-0.05	0.01	0	0.05	0.11	0.07	0.11	0.07	0	0	0.1	0.06	0.05	0.07	0.07	0.11	0.1	0.12	0.06	0.11
PA14_RS08510 ←:1,829,238:R126G (CGT→GGT)	PA14_RS08510	PA14_21150		ABC transporter permease	0.07	0	-0.05	0	0	0	0.07	0	0	0	0	0.05	0.07	0	0	0	0	0	0	0	0	0	0	0	0.07	0	0
PA14_RS14205 →:3,107,592:A409G (GCG→GGG)	PA14_RS14205	PA14_34900		oxidoreductase	0.07	0	-0.07	0	-0.07	0.06	0	0	0	0	0	0.07	0.07	0	0	0	0.07	0	0	0	0.06	0	0	0	0	0	0
PA14_RS16005 →:3,514,148:T352T (ACA→ACT)	PA14_RS16005	PA14_39480		hypothetical protein	0.07	0	-0.07	0	-0.08	0	0	0	0	0	0	0.07	0.07	0	0	0	0.08	0	0	0	0	0	0	0	0	0	0
PA14_RS22320 → / → phaG:4,858,767:intergenic (+109/‑343)	PA14_RS22320	PA14_54820		hypothetical protein	0.07	0	-0.07	0	0	0.07	-0.07	0	0.07	0	0	0.07	0.07	0	0	0	0	0	0	0	0.07	0.07	0	0	0	0	0.07
PA14_RS25025 →:5,469,866:S3T (TCA→ACA)	PA14_RS25025	PA14_61270		hypothetical protein	0.07	0	-0.07	0.07	0	0	0	0.08	-0.1	0	0	0.07	0.07	0	0	0	0	0	0.07	0	0	0	0	0.1	0	0.08	0
PA14_RS21870 →:4,763,304:R257P (CGC→CCC)	PA14_RS21870	PA14_53720		transcriptional regulator	0.07	-0.01	-0.11	-0.1	0	0.02	0.08	-0.09	-0.08	0	0.1	0.11	0.07	0.09	0	0.1	0	0.07	0	0	0.09	0	0.09	0.08	0.08	0	0
PA14_RS13275 → / ← PA14_RS13280:2,827,519:intergenic (+77/+113)	PA14_RS13275	PA14_32540		hypothetical protein	0.07	0	-0.03	0.17	-0.1	-0.12	-0.15	0.09	0.08	0.11	0	0.16	0.18	0	0.13	0	0.1	0.12	0.17	0	0	0.15	0.14	0.12	0	0.23	0.2
mdoH ←:5,988,014:M76L (ATG→TTG)	mdoH	PA14_67065	mdoH	glucosyltransferase MdoH	0.06	0.02	0.01	-0.02	-0.07	-0.04	0.15	0.01	0.05	0.08	0.11	0.1	0.14	0.13	0.11	0.12	0.15	0.14	0.1	0.08	0.1	0	0.1	0.07	0.15	0.11	0.12
PA14_RS15380 ←:3,372,331:V336V (GTC→GTG)	PA14_RS15380	PA14_37820		hypothetical protein	0.06	-0.14	0	-0.01	-0.16	0	0.06	0.01	0.02	0.11	0.14	0	0.17	0	0	0.15	0.16	0	0.14	0	0	0.17	0.13	0.13	0.23	0.14	0.15
xth ←:853,906:D101A (GAC→GCC)	xth				0.06	0	0.07	0	0	0	0	0	0	0	0	0	0.06	0	0.07	0	0	0	0	0	0	0	0	0	0	0	0
ccoP → / → ccoG:3,954,048:intergenic (+82/‑137)	ccoP				0.06	0	0	0	0	0	0	0	0	0	0	0	0.06	0	0	0	0	0	0	0	0	0	0	0	0	0	0
mscK →:5,922,000:Q361L (CAG→CTG)	mscK				0.06	0	0	0	0	0	0	0	0	0	0	0	0.06	0	0	0	0	0	0	0	0	0	0	0	0	0	0
sulA ←:2,200,357:I158F (ATT→TTT)	sulA				0.06	0	0	0	0	-0.07	0	0	0	0	0	0	0.06	0	0	0	0	0.07	0	0	0	0	0	0	0	0	0
tssJ ←:95,733:Q45P (CAG→CCG)	tssJ				0.06	0	0	0.1	-0.12	0	0.12	0	0	0	0	0	0.06	0	0	0	0.12	0	0.1	0	0	0	0	0	0.12	0	0
alaC ←:5,566,895:I13L (ATC→CTC)	alaC				0.06	-0.08	0	-0.01	0	0.08	-0.02	-0.02	-0.03	0	0.08	0.07	0.06	0	0.07	0.08	0	0	0.07	0	0.08	0.08	0.08	0.09	0.06	0.06	0.06
ada ←:3,312,796:C317G (TGC→GGC)	ada				0.06	0.07	-0.02	-0.01	-0.08	0	0.13	-0.05	-0.02	0.06	0	0.11	0.12	0.07	0.09	0.12	0.08	0.12	0.11	0	0.12	0	0.13	0.11	0.13	0.08	0.09
oadA ←:6,390,154:E362D (GAG→GAC)	oadA				0.06	0	-0.06	0.08	0	0	-0.06	0	0.04	0	0	0.06	0.06	0	0	0	0	0	0.08	0	0	0.06	0	0.06	0	0	0.1
PA14_RS26490 →:5,775,165:A237P (GCC→CCC)	PA14_RS26490	PA14_64800	vanA	vanillate O-demethylase oxygenase	0.06	0	-0.07	0	0	0	-0.06	-0.05	0	0	0	0.07	0.06	0	0	0	0	0.06	0	0	0.06	0.06	0.05	0	0	0	0
pvdL →:2,913,216:R373P (CGC→CCC)	pvdL	PA14_33280	pvdL	peptide synthase	0.06	0	0	0	0	0	0	0	0	0	0	0	0.06	0	0	0	0	0	0	0	0	0	0	0	0	0	0
putP ← / ← putA:4,802,964:intergenic (‑292/+20)	putP	PA14_54150	putP	sodium/proline symporter PutP	0.06	0.08	0.06	-0.08	0.02	0.08	0.02	0.01	0	0	0	0	0.06	0.08	0.06	0.08	0.09	0	0	0.11	0.08	0.07	0.08	0	0.09	0.09	0
pscH ←:3,771,316:E39A (GAG→GCG)	pscH	PA14_42290	pscH	type III export protein PscH	0.06	0	0.13	0	0.08	0	0	0	0	0.1	0	0	0.16	0	0.13	0	0	0	0	0.08	0	0	0	0	0	0	0
PA14_RS20795 ←:4,549,000:M1K (ATG→AAG) †	PA14_RS20795	PA14_51170	pauA	pimeloyl-CoA synthetase	0.06	0.06	0	0	-0.06	0.05	0	0	0.05	0	0	0	0.06	0.06	0	0	0.06	0	0	0	0.05	0	0	0	0	0	0.05
PA14_RS03105 ←:667,199:L717Q (CTA→CAA)	PA14_RS03105	PA14_07770	ostA	organic solvent tolerance protein OstA	0.06	0.07	-0.05	0	0	0.06	0.05	0	0	0	0	0.05	0.06	0.07	0	0	0	0	0	0	0.06	0	0	0	0.05	0	0
PA14_RS05530 ←:1,180,239:R135P (CGC→CCC)	PA14_RS05530	PA14_13740	narX	two-component sensor NarX	0.06	-0.11	-0.03	0	0	0.11	0	-0.1	0	0	0.11	0.11	0.06	0	0.08	0	0	0	0	0	0.11	0	0.1	0	0	0	0
folK →:654,716:E160D (GAA→GAC)	folK	PA14_62570	folK	2-amino-4-hydroxy-6- hydroxymethyldihydropteridine pyrophosphokinase	0.06	0	0	0	0	0	0	0	0	0	0	0	0.06	0	0	0	0	0	0	0	0	0	0	0	0	0	0
folK →:654,711:F159V (TTC→GTC)	folK	PA14_62570	folK	2-amino-4-hydroxy-6- hydroxymethyldihydropteridine pyrophosphokinase	0.06	-0.06	-0.06	-0.07	-0.05	0.03	0.02	0	0	0	0.06	0.06	0.06	0	0	0.07	0.05	0.08	0	0	0.11	0.05	0	0	0.07	0	0
fabA →:3,890,593:T168T (ACT→ACA)	fabA	PA14_43680	fabA	3-hydroxydecanoyl-ACP dehydratase	0.06	0	0	0	0	0	0	0	0	0	0	0	0.06	0	0	0	0	0	0	0	0	0	0	0	0	0	0
PA14_RS23795 → / → PA14_RS23800:5,196,714:intergenic (+32/‑62)	PA14_RS23795	PA14_58350	dppA1	dipeptide ABC transporter substrate-binding protein DppA1	0.06	0	0	0	0	0	0	0	0	0	0	0	0.06	0	0	0	0	0	0	0	0	0	0	0	0	0	0
PA14_RS19105 →:4,188,788:Y362N (TAC→AAC)	PA14_RS19105	PA14_47000		oxidoreductase	0.06	0	0.09	0	0	0	0	0	-0.09	0	0	0	0.06	0	0.09	0	0	0	0	0	0	0	0	0.09	0	0	0
PA14_RS11605 ← / → PA14_RS11610:2,461,297:intergenic (‑203/‑20)	PA14_RS11605	PA14_28530		hypothetical protein	0.06	0	0.08	0	0	-0.09	-0.11	0.06	0	0	0	0	0.06	0	0.08	0	0	0.09	0	0	0	0.11	0	0	0	0.06	0
PA14_RS12455 →:2,644,946:S155T (AGC→ACC) ‡	PA14_RS12455	PA14_30550		periplasmic aliphatic sulfonate-binding protein	0.06	-0.04	0.06	0.11	0.01	0.09	0	-0.13	0	0.1	0.15	0.11	0.16	0.11	0.17	0	0.13	0	0.11	0.14	0.09	0	0.13	0	0	0	0
PA14_RS25000 ←:5,461,135:D1240D (GAT→GAC)	PA14_RS25000	PA14_61200		hypothetical protein	0.06	-0.02	0.05	0	0.02	0.07	0.01	0.04	0.03	0.41	0.42	0.35	0.47	0.4	0.4	0.41	0.4	0.4	0.41	0.42	0.47	0.42	0.43	0.38	0.43	0.47	0.41
PA14_RS08860 ←:1,907,935:L252R (CTG→CGG)	PA14_RS08860	PA14_21930		ABC transporter permease	0.06	-0.01	0.03	-0.03	-0.2	0.01	-0.19	-0.01	0.02	0.12	0.15	0.18	0.18	0.14	0.21	0.18	0.2	0.16	0.15	0	0.17	0.19	0.16	0.15	0	0.15	0.17
PA14_RS03190 →:687,268:S54C (AGT→TGT)	PA14_RS03190	PA14_07970		hypothetical protein	0.06	0	0	0	-0.06	0.09	0	-0.06	0	0	0	0	0.06	0	0	0	0.06	0	0	0	0.09	0	0.06	0	0	0	0
PA14_RS07305 →:1,560,987:L195H (CTC→CAC)	PA14_RS07305	PA14_18200		LysR family transcriptional regulator	0.06	0	0	0	0	0	-0.07	0	-0.12	0	0	0	0.06	0	0	0	0	0	0	0	0	0.07	0	0.12	0	0	0
PA14_RS11030 →:2,367,397:S90R (AGC→AGG)	PA14_RS11030	PA14_27270		hypothetical protein	0.06	0	0	0	0	0	0	0	0	0	0	0	0.06	0	0	0	0	0	0	0	0	0	0	0	0	0	0
PA14_RS18305 → / → PA14_RS18310:4,015,978:intergenic (+222/‑75)	PA14_RS18305	PA14_45020		oxidoreductase	0.06	0	0	0	0	0	0	0	0	0	0	0.07	0.06	0	0.07	0	0	0	0	0	0	0	0	0	0	0	0
PA14_RS20025 ←:4,380,910:G141G (GGC→GGG)	PA14_RS20025	PA14_49300		lipoxygenase	0.06	0	0	0	0	0	0	0	0	0	0	0	0.06	0	0	0	0	0	0	0	0	0	0	0	0	0	0
PA14_RS25515 ← / → PA14_RS25520:5,569,802:intergenic (‑388/‑26)	PA14_RS25515	PA14_62430		hypothetical protein	0.06	0	0	0	0	0	0	0	0	0	0	0	0.06	0	0	0	0	0	0	0	0	0	0	0	0	0	0
PA14_RS26080 ← / ← PA14_RS26085:5,685,160:intergenic (‑32/+19)	PA14_RS26080	PA14_63770		hypothetical protein	0.06	0	0	0	0	0	0	0	0	0	0	0	0.06	0	0	0	0	0	0	0	0	0	0	0	0	0	0
PA14_RS26335 →:5,742,748:G379G (GGT→GGG)	PA14_RS26335	PA14_64450		heat-shock protein	0.06	0	0	0	0	0	-0.06	0	0	0	0	0	0.06	0	0	0	0	0	0	0	0	0.06	0	0	0	0	0
PA14_RS27550 ←:6,032,658:H313Q (CAT→CAA)	PA14_RS27550	PA14_67530		hypothetical protein	0.06	0	0	0	0	0	0	0	0	0	0	0	0.06	0	0	0	0	0	0	0	0	0	0	0	0	0	0
PA14_RS28890 →:6,319,913:N27K (AAC→AAG)	PA14_RS28890	PA14_70930		hypothetical protein	0.06	0	0	0	0	0	0	0	0	0	0	0	0.06	0	0	0	0	0	0	0	0	0	0	0	0	0	0
PA14_RS28965 ←:6,337,618:V50G (GTC→GGC)	PA14_RS28965	PA14_71140		3-hydroxybutyryl-CoA dehydrogenase	0.06	0	0	0	0	0	0	0	0.09	0	0	0	0.06	0	0	0	0	0	0	0	0	0	0	0	0	0	0.09
PA14_RS23025 ←:5,036,905:Y379F (TAT→TTT)	PA14_RS23025	PA14_56480		hydrolase	0.06	-0.06	0	0	0	0	0	0	0	0	0.06	0	0.06	0	0	0	0	0	0	0	0	0	0	0	0	0	0
PA14_RS03275 →:700,896:R76R (CGC→CGG)	PA14_RS03275	PA14_08160		lytic enzyme	0.06	-0.06	0	-0.03	-0.06	-0.05	0	0	0	0.06	0.17	0.09	0.12	0.11	0.09	0.11	0.18	0.15	0.08	0.12	0.1	0	0	0	0	0	0
PA14_RS26335 →:5,742,708:V366G (GTC→GGC)	PA14_RS26335	PA14_64450		heat-shock protein	0.06	-0.09	0	0	0	0	0	0	-0.06	0	0.09	0	0.06	0	0	0	0	0	0	0	0	0	0	0.06	0	0	0
acs → / → PA14_RS25600:5,589,424:intergenic (+23/‑74)	PA14_RS25600	PA14_62640		hypothetical protein	0.06	0.01	-0.07	-0.08	0.02	-0.01	0.05	0.05	0.02	0.26	0.3	0.42	0.32	0.31	0.35	0.41	0.37	0.31	0.33	0.39	0.3	0.27	0.27	0.34	0.32	0.32	0.36
PA14_RS09480 →:2,032,520:A207S (GCT→TCT)	PA14_RS09480	PA14_23400		hypothetical protein	0.06	0	-0.08	0	0	0	0	0	0	0	0	0.08	0.06	0	0	0	0	0	0	0	0	0	0	0	0	0	0
rpsF ← / ← rlmB:5,809,309:intergenic (‑195/+24)	rpsF	PA14_65180	rpsF	30S ribosomal protein S6	0.06	0.65	-0.04	-0.09	0.18	0.09	0.03	0.04	-0.32	0.54	0	0.6	0.6	0.65	0.56	0.53	0.45	0.53	0.44	0.63	0.62	0.52	0.59	1	0.55	0.63	0.68
rpsF ← / ← rlmB:5,809,296:intergenic (‑182/+35)	rpsF	PA14_65180	rpsF	30S ribosomal protein S6	0.05	-0.07	0.02	-0.11	-0.05	-0.12	-0.06	0.12	0.04	0.72	0.74	0.76	0.77	0.67	0.78	0.78	0.68	0.79	0.67	0.63	0.67	0.66	0.64	0.67	0.6	0.76	0.71
armR →:1,392,245:R42P (CGC→CCC)	armR				0.05	0.16	-0.15	0	0.12	0.15	0	0	-0.15	0.15	0	0.15	0.2	0.16	0	0.16	0	0	0.16	0.12	0.15	0	0	0.15	0	0	0
PA14_RS28620 →:6,264,651:A188P (GCC→CCC)	PA14_RS28620	PA14_70270	algC	phosphomannomutase	0.05	0	0	0	0.18	0	0	-0.14	0	0.15	0	0	0.2	0	0	0	0	0	0	0.18	0	0	0.14	0	0	0	0
PA14_RS05000 ← / ← hemL:1,066,298:intergenic (‑196/+13)	PA14_RS05000	PA14_12370		hypothetical protein	0.05	0	0.04	0	-0.19	0.27	-0.31	0.23	0.29	0.22	0	0.27	0.27	0	0.31	0	0.19	0	0	0	0.27	0.31	0	0	0	0.23	0.29
PA14_RS29740 →:6,505,670:A255G (GCG→GGG)	PA14_RS29740	PA14_73050		GTP cyclohydrolase	0.05	0.04	0.03	0.07	-0.05	-0.03	-0.01	0.02	-0.02	0.12	0.17	0.17	0.17	0.21	0.2	0.11	0.21	0.19	0.18	0.16	0.16	0.14	0.19	0.18	0.13	0.21	0.16
PA14_RS07305 →:1,561,050:V216G (GTC→GGC)	PA14_RS07305	PA14_18200		LysR family transcriptional regulator	0.05	0	0.01	-0.05	-0.06	-0.08	0.04	0.04	0.01	0.09	0.13	0.15	0.14	0.13	0.16	0.2	0.17	0.21	0.15	0.11	0.13	0.11	0.13	0.11	0.15	0.17	0.12
sbrI →:2,318,618:V194V (GTA→GTT)	sbrI	PA14_26600	sbrI	SbrI	0.05	0	-0.05	0	0	0	-0.06	-0.06	0	0	0	0.05	0.05	0	0	0	0	0	0	0	0	0.06	0.06	0	0	0	0
PA14_RS03770 →:792,074:N685T (AAC→ACC)	PA14_RS03770	PA14_09280	pchF	pyochelin synthetase	0.05	0	0	0.05	0	0	0	0	0	0	0	0	0.05	0	0	0	0	0	0.05	0	0	0	0	0	0	0	0
PA14_RS20875 →:4,563,761:S309R (AGC→CGC) ‡	PA14_RS20875	PA14_51340	mvfR	transcriptional regulator MvfR	0.05	-0.09	-0.05	-0.07	0.08	0	0.03	0.02	-0.01	0	0.09	0.05	0.05	0	0	0.07	0	0	0	0.08	0	0.06	0.05	0.08	0.09	0.07	0.07
PA14_RS01310 ← / ← PA14_RS01315:289,185:intergenic (‑213/+1614)	PA14_RS01310	PA14_03240	hcpC	secreted protein Hcp	0.05	0	0	0	-0.06	0	0	0	0	0	0	0	0.05	0	0	0	0.06	0	0	0	0	0	0	0	0	0	0
PA14_RS29110 →:6,367,730:Q261H (CAG→CAC)	PA14_RS29110	PA14_71460	glyA1	serine hydroxymethyltransferase	0.05	0	0	0	0	0	0.06	0	0.07	0	0	0	0.05	0	0	0	0	0	0	0	0	0	0	0	0.06	0	0.07
flgG ←:4,481,042:P201P (CCG→CCC)	flgG	PA14_50430	flgG	flagellar basal body rod protein FlgG	0.05	0	0	0	0	0	0	0	0	0	0	0	0.05	0	0	0	0	0	0	0	0	0	0	0	0	0	0
PA14_RS08420 ←:1,804,219:L107Q (CTG→CAG)	PA14_RS08420	PA14_20950	fabH2	3-oxoacyl-ACP synthase	0.05	0	0	0	0	0	0	0	0	0	0	0	0.05	0	0	0	0	0	0	0	0	0	0	0	0	0	0
dsbG →:2,833,054:M220R (ATG→AGG)	dsbG	PA14_32610	dsbG	disulfide isomerase/thiol-disulfide oxidase	0.05	0.05	-0.03	-0.07	-0.01	-0.01	0	-0.1	-0.09	0.06	0.06	0.12	0.11	0.11	0.09	0.07	0.1	0.09	0	0.09	0.08	0	0.1	0.09	0	0	0
argJ ← / ← secA:5,097,375:intergenic (‑98/+49)	argJ	PA14_57210	argJ	bifunctional ornithine acetyltransferase/N-acetylglutamate synthase	0.05	0	0.06	0	0	0	0	0	0.05	0	0.06	0	0.05	0.06	0.06	0.07	0	0	0.07	0	0	0	0	0	0	0	0.05
PA14_RS27785 →:6,078,827:N326K (AAT→AAA)	PA14_RS27785	PA14_68120		outer membrane protein	0.05	0.02	0.08	0	0	-0.01	0	0.07	0.08	0	0.06	0	0.05	0.08	0.08	0	0	0.07	0	0	0.06	0	0	0	0	0.07	0.08
PA14_RS11360 →:2,425,389:I153N (ATC→AAC)	PA14_RS11360	PA14_28010		hypothetical protein	0.05	0	0	0	0	0	0	0.09	0	0	0	0	0.05	0	0	0	0	0	0	0	0	0	0	0	0	0.09	0
PA14_RS13995 →:3,053,959:Y342D (TAC→GAC)	PA14_RS13995	PA14_34330		hypothetical protein	0.05	0	0	0	0	0	-0.11	0	-0.11	0	0	0	0.05	0	0	0	0	0	0	0	0	0.11	0	0.11	0	0	0
PA14_RS14955 ←:3,277,035:D85V (GAT→GTT)	PA14_RS14955	PA14_36740		hypothetical protein	0.05	0	0	0	0	0	0	0	0	0	0	0	0.05	0	0	0	0	0	0	0	0	0	0	0	0	0	0
PA14_RS21910 ←:4,771,746:coding (7/474 nt)	PA14_RS21910	PA14_53810		hypothetical protein	0.05	0	0	0	0	0	0	0	0	0	0	0	0.05	0	0	0	0	0	0	0	0	0	0	0	0	0	0
PA14_RS25515 ←:5,568,988:R143W (AGG→TGG)	PA14_RS25515	PA14_62430		hypothetical protein	0.05	0	0	0	0	0	0	0	0	0	0	0	0.05	0	0	0	0	0	0	0	0	0	0	0	0	0	0
PA14_RS25520 →:5,569,829:M1K (ATG→AAG) †	PA14_RS25520	PA14_62440		transporter	0.05	0	0	0	0	0	-0.07	0	0	0	0	0	0.05	0	0	0	0	0	0	0	0	0.07	0	0	0	0	0
PA14_RS26840 →:5,852,601:E83D (GAA→GAC)	PA14_RS26840	PA14_65720		lipoprotein	0.05	0	0	0	0	0	0	0	0.06	0	0	0	0.05	0	0	0	0	0	0	0	0	0	0	0	0	0	0.06
PA14_RS28740 → / ← PA14_RS28745:6,289,516:intergenic (+47/+25)	PA14_RS28740	PA14_70580		hypothetical protein	0.05	0	0	0	-0.1	-0.1	-0.02	-0.08	0.02	0	0	0	0.05	0	0	0	0.1	0.1	0	0	0	0.09	0.08	0.06	0.07	0	0.08
PA14_RS02930 ← / ← PA14_RS02935:630,037:intergenic (‑56/+73)	PA14_RS02930	PA14_07310		hydrolase	0.05	-0.01	0	0	0.07	0.07	0	0	0.05	0	0.06	0	0.05	0.05	0	0	0	0	0	0.07	0.07	0.05	0.06	0	0.05	0.06	0.05
PA14_RS03275 →:700,893:G75G (GGT→GGC) ‡	PA14_RS03275	PA14_08160		lytic enzyme	0.05	-0.07	0	-0.03	-0.07	-0.05	0	0	0	0.06	0.17	0.08	0.11	0.1	0.08	0.11	0.18	0.15	0.08	0.11	0.1	0	0	0	0	0	0
PA14_RS02930 ← / ← PA14_RS02935:630,092:intergenic (‑111/+18)	PA14_RS02930	PA14_07310		hydrolase	0.05	-0.09	0	0	0	0	0.05	0.01	0	0	0.09	0.09	0.05	0	0.09	0	0	0	0	0	0	0	0.05	0.06	0.05	0.06	0.06
PA14_RS28530 ←:6,245,125:M110L (ATG→TTG)	PA14_RS28530	PA14_70010		hypothetical protein	0.05	0.05	-0.01	0.02	-0.05	0	0.03	0	0	0	0	0.07	0.05	0.05	0.06	0.06	0.05	0	0.08	0	0	0.05	0.06	0	0.08	0.06	0
PA14_RS23310 →:5,094,073:E140A (GAA→GCA)	PA14_RS23310	PA14_57180		hypothetical protein	0.05	0.3	0.03	0	-0.15	0	0.5	0	0.43	0.24	0	0.19	0.29	0.3	0.22	0	0.33	0	0	0.18	0	0	0	0	0.5	0	0.43
PA14_RS28740 → / ← PA14_RS28745:6,289,508:intergenic (+39/+33)	PA14_RS28740	PA14_70580		hypothetical protein	0.05	-0.02	0.03	0	-0.03	0	0	-0.02	-0.01	0.14	0.18	0.12	0.19	0.16	0.15	0.15	0.14	0.17	0.15	0.11	0.17	0.18	0.17	0.18	0.18	0.15	0.17
PA14_RS08860 ←:1,907,942:S250R (AGC→CGC)	PA14_RS08860	PA14_21930		ABC transporter permease	0.05	-0.04	0.01	-0.06	-0.01	0.02	-0.01	0	0.01	0.14	0.19	0.16	0.19	0.15	0.17	0.22	0.19	0.15	0.16	0.18	0.17	0.18	0.14	0.18	0.17	0.14	0.19
PA14_RS03275 →:700,899:Y77Y (TAT→TAC)	PA14_RS03275	PA14_08160		lytic enzyme	0.05	-0.07	0.01	-0.03	-0.06	-0.06	0	0	0	0.07	0.18	0.08	0.12	0.11	0.09	0.12	0.18	0.16	0.09	0.12	0.1	0	0	0	0	0	0
PA14_RS03275 →:700,891:G75S (GGT→AGT) ‡	PA14_RS03275	PA14_08160		lytic enzyme	0.05	-0.06	0	-0.03	-0.07	-0.05	0	0	0	0.07	0.17	0.08	0.12	0.11	0.08	0.11	0.18	0.15	0.08	0.11	0.1	0	0	0	0	0	0
PA14_RS03275 →:700,906:P80A (CCC→GCC)	PA14_RS03275	PA14_08160		lytic enzyme	0.05	-0.13	-0.01	0.02	-0.11	-0.08	0	0	0	0.13	0.31	0.15	0.18	0.18	0.14	0.16	0.28	0.25	0.18	0.17	0.17	0	0	0	0	0	0
PA14_RS03275 →:700,914:G82G (GGG→GGC)	PA14_RS03275	PA14_08160		lytic enzyme	0.05	-0.12	-0.02	0.01	-0.12	-0.1	0	0	0	0.14	0.33	0.17	0.19	0.21	0.15	0.17	0.3	0.27	0.18	0.18	0.17	0	0	0	0	0	0
PA14_RS28620 →:6,264,643:V185G (GTG→GGG)	PA14_RS28620	PA14_70270	algC	phosphomannomutase	0.04	0	0.08	-0.03	-0.04	0.03	-0.02	0.05	0.04	0.41	0.45	0.39	0.45	0.45	0.47	0.42	0.46	0.43	0.39	0.42	0.46	0.42	0.41	0.39	0.4	0.46	0.43
PA14_RS05280 → / → PA14_RS05285:1,128,165:intergenic (+26/‑35)	PA14_RS05280	PA14_13130		hypothetical protein	0.04	-0.16	0	0.16	0.16	0.17	-0.19	0.06	0	0.85	1	1	0.89	0.84	1	0.84	0.84	0.83	1	1	1	1	0.83	1	0.81	0.89	1
PA14_RS18780 → / ← PA14_RS18785:4,117,799:intergenic (+12/+120)	PA14_RS18780	PA14_46280		hypothetical protein	0.04	0.04	-0.06	-0.04	0.01	-0.03	-0.07	-0.05	0.07	0.3	0.29	0.33	0.34	0.33	0.27	0.32	0.26	0.29	0.28	0.27	0.26	0.32	0.32	0.25	0.25	0.27	0.32
PA14_RS23080 →:5,046,039:V29G (GTC→GGC)	PA14_RS23080	PA14_56640		MFS transporter	0.04	0	0.05	0.17	-0.11	0.17	0	0.11	0.01	0.13	0	0.09	0.17	0	0.14	0	0.11	0	0.17	0	0.17	0	0	0.12	0	0.11	0.13
PA14_RS23285 ← / ← PA14_RS23290:5,088,779:intergenic (‑140/+93)	PA14_RS23285	PA14_57110		hypothetical protein	0.04	-0.15	0.04	-0.13	-0.06	0	-0.16	0.02	0	0.13	0.15	0.1	0.17	0	0.14	0.13	0.18	0.17	0	0.12	0.17	0.16	0.15	0.13	0	0.17	0.13
PA14_RS26210 → / → prmA:5,715,810:intergenic (+40/‑42)	PA14_RS26210	PA14_64120		hypothetical protein	0.04	-0.03	0.01	-0.06	-0.2	0.01	-0.03	-0.02	-0.03	0.15	0.15	0.16	0.19	0.12	0.17	0.21	0.2	0.18	0.15	0	0.19	0.18	0.17	0.21	0.15	0.15	0.18
PA14_RS00950 → / ← PA14_RS00955:212,268:intergenic (+6/+17)	PA14_RS00950	PA14_02360		ABC transporter substrate-binding protein	0.04	0.01	0.01	-0.01	-0.02	0.04	-0.02	-0.06	0	0.13	0.15	0.14	0.17	0.16	0.15	0.17	0.19	0.16	0.16	0.17	0.2	0.12	0.16	0.19	0.1	0.1	0.19
PA14_RS27015 ←:5,896,945:L278V (CTG→GTG)	PA14_RS27015	PA14_66190		hypothetical protein	0.04	-0.06	0	0	0.09	0	0	-0.06	0	0.06	0.06	0	0.1	0	0	0	0	0	0	0.09	0	0	0.06	0	0	0	0
PA14_RS02930 ← / ← PA14_RS02935:630,090:intergenic (‑109/+20)	PA14_RS02930	PA14_07310		hydrolase	0.04	0.01	-0.03	-0.02	0.02	0.03	0.02	-0.02	0	0.13	0.17	0.22	0.17	0.18	0.19	0.19	0.2	0.14	0.17	0.22	0.17	0.19	0.2	0.16	0.21	0.18	0.16
PA14_RS04690 ←:1,003,120:R128R (CGC→CGG)	PA14_RS04690	PA14_11590		hypothetical protein	0.04	-0.05	-0.1	0	0.06	0.02	0.05	0	0	0.21	0.28	0.23	0.25	0.23	0.13	0.23	0.21	0.23	0.23	0.27	0.25	0.22	0.28	0.28	0.27	0.28	0.28
PA14_RS19365 →:4,240,809:S95R (AGC→CGC)	PA14_RS19365	PA14_47640		major facilitator transporter	0.04	0.11	0.14	0	0	0.14	0.1	0.04	0.09	0.08	0	0	0.12	0.11	0.14	0	0	0	0	0	0.14	0	0.08	0	0.1	0.12	0.09
PA14_RS05280 → / → PA14_RS05285:1,128,162:intergenic (+23/‑38)	PA14_RS05280	PA14_13130		hypothetical protein	0.03	0	0	-0.13	0	0.13	0	0.04	0	0.87	1	1	0.9	1	1	1	1	0.87	0.87	1	1	1	0.88	1	1	0.92	1
PA14_RS00950 → / ← PA14_RS00955:212,267:intergenic (+5/+18)	PA14_RS00950	PA14_02360		ABC transporter substrate-binding protein	0.03	0	0.12	0	0	-0.11	0.08	-0.09	0	0.11	0	0	0.14	0	0.12	0	0	0.11	0	0	0	0	0.09	0.11	0.08	0	0.11
PA14_RS06025 →:1,283,274:V149G (GTG→GGG)	PA14_RS06025	PA14_15130		hypothetical protein	0.03	0.08	0	-0.02	0.03	-0.03	0.01	0.03	0.05	0.11	0.09	0.15	0.14	0.17	0.15	0.14	0.14	0.18	0.12	0.17	0.15	0.15	0.11	0.1	0.16	0.14	0.15
PA14_RS00255 ← / → PA14_RS00260:62,994:intergenic (‑56/‑707)	PA14_RS00255	PA14_00620		hypothetical protein	0.03	0	0.15	0.16	0	0	-0.08	-0.01	0.06	0.13	0	0	0.16	0	0.15	0	0	0	0.16	0	0	0.08	0.12	0.14	0	0.11	0.2
PA14_RS24720 ← / ← PA14_RS24725:5,394,315:intergenic (‑208/+49)	PA14_RS24720	PA14_60520		hypothetical protein	0.03	0	0.03	-0.03	-0.04	-0.01	0.05	0	0.02	0.08	0.1	0.13	0.11	0.1	0.16	0.13	0.16	0.14	0.1	0.12	0.13	0.09	0.11	0.1	0.14	0.11	0.12
PA14_RS17535 →:3,844,594:L93V (CTG→GTG)	PA14_RS17535	PA14_43160		transporter	0.03	0	0	0	0	0	0	0	0	0.08	0	0	0.11	0	0	0	0	0	0	0	0	0	0	0	0	0	0
PA14_RS22195 → / → PA14_RS22200:4,836,066:intergenic (+14/‑35)	PA14_RS22195	PA14_54540		hypothetical protein	0.03	0	0	0	0	0	-0.21	0	-0.18	0.12	0	0	0.15	0	0	0	0	0	0	0	0	0.21	0	0.18	0	0	0
PA14_RS03275 →:700,981:T105S (ACG→TCG)	PA14_RS03275	PA14_08160		lytic enzyme	0.03	-0.12	0	0.04	-0.11	-0.15	0	0	0	0.13	0.3	0.14	0.16	0.18	0.14	0.15	0.3	0.3	0.19	0.19	0.15	0	0	0	0	0	0
PA14_RS25000 ←:5,460,217:Y1546Y (TAT→TAC)	PA14_RS25000	PA14_61200		hypothetical protein	0.03	0	-0.01	0.03	-0.01	-0.03	-0.02	-0.01	-0.01	0.09	0.1	0.09	0.12	0.1	0.08	0.06	0.09	0.08	0.09	0.08	0.05	0.1	0.08	0.08	0.08	0.07	0.07
PA14_RS03275 →:700,953:P95P (CCG→CCC)	PA14_RS03275	PA14_08160		lytic enzyme	0.03	-0.11	-0.02	0.02	-0.11	-0.12	0	0	0	0.13	0.29	0.14	0.16	0.18	0.12	0.15	0.28	0.27	0.17	0.17	0.15	0	0	0	0	0	0
PA14_RS03275 →:700,956:Q96Q (CAG→CAA) ‡	PA14_RS03275	PA14_08160		lytic enzyme	0.03	-0.11	-0.02	0.02	-0.11	-0.11	0	0	0	0.13	0.29	0.14	0.16	0.18	0.12	0.15	0.28	0.26	0.17	0.17	0.15	0	0	0	0	0	0
PA14_RS03275 →:700,962:I98I (ATT→ATC)	PA14_RS03275	PA14_08160		lytic enzyme	0.03	-0.11	-0.02	0.02	-0.1	-0.12	0	0	0	0.13	0.29	0.14	0.16	0.18	0.12	0.15	0.27	0.26	0.17	0.17	0.14	0	0	0	0	0	0
PA14_RS03275 →:700,926:A86A (GCG→GCC)	PA14_RS03275	PA14_08160		lytic enzyme	0.03	-0.12	-0.02	0.02	-0.12	-0.12	0	0	0	0.14	0.33	0.17	0.17	0.21	0.15	0.17	0.3	0.29	0.19	0.18	0.17	0	0	0	0	0	0
PA14_RS03275 →:700,966:D100N (GAC→AAC)	PA14_RS03275	PA14_08160		lytic enzyme	0.03	-0.12	-0.02	0.02	-0.12	-0.13	0	0	0	0.12	0.3	0.14	0.15	0.18	0.12	0.15	0.28	0.27	0.17	0.16	0.14	0	0	0	0	0	0
PA14_RS03275 →:700,972:T102A (ACC→GCC)	PA14_RS03275	PA14_08160		lytic enzyme	0.03	-0.12	-0.02	0.02	-0.11	-0.13	0	0	0	0.13	0.3	0.14	0.16	0.18	0.12	0.15	0.28	0.27	0.17	0.17	0.14	0	0	0	0	0	0
PA14_RS17970 →:3,936,129:S49R (AGC→CGC)	PA14_RS17970	PA14_44240		glutamine synthetase	0.03	0.01	-0.04	-0.12	0.01	0.02	0	0.06	0	0.09	0.1	0.14	0.12	0.11	0.1	0.12	0.11	0.08	0	0.12	0.1	0	0.08	0	0	0.14	0
PA14_RS02885 → / → PA14_RS02890:622,843:intergenic (+151/‑9)	PA14_RS02885	PA14_07200		hypothetical protein	0.03	-0.01	-0.16	0.03	-0.01	0.05	0.01	-0.03	-0.01	0.08	0.15	0.16	0.11	0.14	0	0.08	0.12	0.12	0.11	0.11	0.17	0.12	0.15	0.14	0.13	0.12	0.13
PA14_RS20570 ←:4,501,399:L201R (CTG→CGG)	PA14_RS20570	PA14_50670		hypothetical protein	0.03	-0.32	-0.21	0	0.22	0.07	0	-0.29	0.31	0.23	0.32	0.21	0.26	0	0	0	0	0.19	0	0.22	0.26	0	0.29	0	0	0	0.31
PA14_RS05280 →:1,128,100:D629E (GAT→GAG)	PA14_RS05280	PA14_13130		hypothetical protein	0.02	-0.03	0.05	-0.15	-0.02	-0.05	0.04	0	-0.07	0.12	0.2	0.11	0.14	0.17	0.16	0.15	0.11	0.14	0	0.09	0.09	0.1	0.09	0.19	0.14	0.09	0.12
PA14_RS09370 ← / ← gltS:2,006,561:intergenic (‑215/+14)	PA14_RS09370	PA14_23130		sensory box GGDEF domain-containing protein	0.02	-0.13	0.05	-0.02	-0.09	-0.07	0	-0.25	0.08	0.29	0.41	0.25	0.31	0.28	0.3	0.3	0.38	0.38	0.28	0.29	0.31	0.29	0.25	0.33	0.29	0	0.41
PA14_RS14815 ←:3,243,022:R14G (CGT→GGT)	PA14_RS14815	PA14_36400		hypothetical protein	0.02	-0.01	-0.16	0.13	0.02	-0.17	0.19	-0.15	0.07	0.15	0.15	0.16	0.17	0.14	0	0	0.11	0.17	0.13	0.13	0	0	0.15	0.15	0.19	0	0.22
PA14_RS22380 ← / ← PA14_RS22385:4,878,756:intergenic (‑221/+33)	PA14_RS22380				0.02	-0.02	0.02	-0.08	0	0.11	0.04	0	0.03	0.06	0.08	0.08	0.08	0.06	0.1	0.08	0.1	0	0	0.1	0.11	0.07	0.08	0.05	0.11	0.08	0.08
ubiA →:6,299,109:R296G (CGT→GGT)	ubiA	PA14_70730	ubiA	4-hydroxybenzoate octaprenyltransferase	0.02	-0.03	0.03	-0.1	-0.08	0	0.02	0	-0.08	0.09	0.1	0.07	0.11	0.07	0.1	0.1	0.08	0.09	0	0	0.09	0.07	0	0.08	0.09	0	0
PA14_RS28740 → / ← PA14_RS28745:6,289,513:intergenic (+44/+28)	PA14_RS28740	PA14_70580		hypothetical protein	0.02	-0.08	0.01	-0.1	0	0	-0.02	-0.02	-0.01	0.09	0.08	0.11	0.11	0	0.12	0.1	0	0.08	0	0	0.08	0.14	0.1	0.1	0.12	0.08	0.09
PA14_RS12970 →:2,754,125:A189P (GCC→CCC)	PA14_RS12970	PA14_31690		hypothetical protein	0.02	0	0	0	0	0	0	0.09	0	0.11	0	0	0.13	0	0	0	0	0	0	0	0	0	0	0	0	0.09	0
PA14_RS02885 → / → PA14_RS02890:622,827:intergenic (+135/‑25)	PA14_RS02885	PA14_07200		hypothetical protein	0.02	-0.01	-0.12	0	-0.06	0.02	0.08	-0.01	-0.01	0.05	0.07	0.12	0.07	0.06	0	0	0.06	0.07	0	0	0.09	0	0.07	0.09	0.08	0.06	0.08
PA14_RS22380 ← / ← PA14_RS22385:4,878,769:intergenic (‑234/+20)	PA14_RS22380				0.02	-0.01	0.04	0.01	0.01	0	0	0.02	0.01	0.1	0.11	0.12	0.12	0.1	0.16	0.1	0.11	0.1	0.11	0.12	0.1	0.11	0.09	0.08	0.11	0.11	0.09
ribB → / → ribE:991,788:intergenic (+21/‑97)	ribB	PA14_11420	ribB	bifunctional 3,4-dihydroxy-2-butanone 4-phosphate synthase/GTP cyclohydrolase II-like protein	0.02	-0.02	0.03	0.07	-0.06	0	-0.09	-0.01	0.02	0.07	0.1	0.07	0.09	0.08	0.1	0	0.06	0	0.07	0	0	0.09	0.1	0.09	0	0.09	0.11
PA14_RS03890 → / ← PA14_RS03895:826,031:intergenic (+7/+33)	PA14_RS03890	PA14_09600	ddlA	D-alanine--D-alanine ligase	0.02	-0.01	0.01	0.1	0	0.06	-0.02	0	-0.16	0.13	0.18	0.18	0.15	0.17	0.19	0	0.16	0.12	0.1	0.16	0.18	0.13	0.17	0.16	0.11	0.17	0
PA14_RS05365 → / ← PA14_RS05370:1,148,650:intergenic (+50/+272)	PA14_RS05365	PA14_13340		extracellular nuclease	0.02	0.11	0.06	0.01	-0.06	-0.05	0	0.02	0.03	0.14	0.17	0.14	0.16	0.28	0.2	0.17	0.21	0.2	0.18	0.15	0.15	0.18	0.16	0.16	0.18	0.18	0.19
PA14_RS29430 →:6,441,737:Q346P (CAG→CCG)	PA14_RS29430	PA14_72300		hypothetical protein	0.02	-0.01	0.03	0.16	-0.01	0	0.14	0	0.05	0.13	0.19	0.18	0.15	0.18	0.21	0	0.13	0	0.16	0.12	0	0	0	0.12	0.14	0	0.17
PA14_RS26830 ←:5,851,380:S41S (TCG→TCC)	PA14_RS26830	PA14_65700		hypothetical protein	0.02	0	0	-0.02	0	0	0.1	0	-0.14	0.13	0	0	0.15	0	0	0.11	0	0	0.09	0	0	0	0.09	0.14	0.1	0.09	0
PA14_RS28740 → / ← PA14_RS28745:6,289,506:intergenic (+37/+35)	PA14_RS28740	PA14_70580		hypothetical protein	0.02	-0.02	0	0.02	-0.03	0	0.02	0	0.06	0.07	0.14	0.13	0.09	0.12	0.13	0.11	0.15	0.13	0.13	0.12	0.13	0.1	0.12	0.07	0.12	0.12	0.13
ubiA → / ← PA14_RS28805:6,299,124:intergenic (+10/+14)	PA14_RS28805	PA14_70740		hypothetical protein	0.02	-0.08	0	-0.07	0.09	0	0.08	0.01	-0.09	0.07	0.08	0	0.09	0	0	0.07	0	0	0	0.09	0	0	0.08	0.09	0.08	0.09	0
PA14_RS00925 ←:205,190:R209P (CGC→CCC)	PA14_RS00925	PA14_02290		LysR family transcriptional regulator	0.02	-0.13	0	-0.05	0	0	0	0.09	-0.15	0.17	0.13	0	0.19	0	0	0.14	0	0	0.09	0	0	0	0	0.15	0	0.09	0
PA14_RS03275 →:700,959:A97A (GCG→GCC)	PA14_RS03275	PA14_08160		lytic enzyme	0.02	-0.11	-0.01	0.02	-0.11	-0.12	0	0	0	0.13	0.29	0.13	0.15	0.18	0.12	0.15	0.28	0.26	0.17	0.17	0.14	0	0	0	0	0	0
PA14_RS03275 →:700,950:N94N (AAT→AAC)	PA14_RS03275	PA14_08160		lytic enzyme	0.02	-0.11	-0.02	0.02	-0.11	-0.11	0	0	0	0.13	0.29	0.14	0.15	0.18	0.12	0.15	0.28	0.26	0.17	0.17	0.15	0	0	0	0	0	0
PA14_RS03275 →:700,955:Q96R (CAG→CGG) ‡	PA14_RS03275	PA14_08160		lytic enzyme	0.02	-0.11	-0.02	0.02	-0.11	-0.11	0	0	0	0.13	0.29	0.14	0.15	0.18	0.12	0.15	0.28	0.26	0.17	0.17	0.15	0	0	0	0	0	0
PA14_RS03275 →:700,933:L89L (TTG→CTG) ‡	PA14_RS03275	PA14_08160		lytic enzyme	0.02	-0.13	-0.02	0.02	-0.12	-0.11	0	0	0	0.14	0.33	0.17	0.16	0.2	0.15	0.17	0.3	0.28	0.19	0.18	0.17	0	0	0	0	0	0
PA14_RS03275 →:700,927:L87L (TTG→CTG)	PA14_RS03275	PA14_08160		lytic enzyme	0.02	-0.12	-0.03	0.02	-0.13	-0.1	0	0	0	0.14	0.32	0.17	0.16	0.2	0.14	0.16	0.3	0.28	0.18	0.17	0.18	0	0	0	0	0	0
PA14_RS03275 →:700,932:A88A (GCC→GCG)	PA14_RS03275	PA14_08160		lytic enzyme	0.02	-0.13	-0.03	0.01	-0.12	-0.11	0	0	0	0.14	0.33	0.17	0.16	0.2	0.14	0.17	0.3	0.28	0.18	0.18	0.17	0	0	0	0	0	0
PA14_RS25000 ←:5,460,211:G1548G (GGT→GGC)	PA14_RS25000	PA14_61200		hypothetical protein	0.02	0	-0.07	0.05	-0.06	-0.06	-0.02	0.01	0	0.07	0.06	0.07	0.09	0.06	0	0	0.06	0.06	0.05	0	0	0.08	0.05	0.06	0.06	0.06	0.06
gdhA ← / ← PA14_RS24805:5,411,476:intergenic (‑254/+42)	PA14_RS24805	PA14_60730		outer membrane protein	0.02	-0.02	-0.19	0.01	0	0.16	0.04	0.01	0.05	0.17	0.2	0.19	0.19	0.18	0	0.16	0.2	0	0.17	0.2	0.16	0.18	0.18	0.13	0.22	0.19	0.18
dgcA → / → dgcB:6,350,913:intergenic (+56/‑46)	dgcA				0.01	0.12	0.11	-0.11	-0.01	0	-0.03	-0.15	0	0.12	0	0	0.13	0.12	0.11	0.11	0.14	0	0	0.13	0	0.17	0.15	0.17	0.14	0	0.17
PA14_RS29520 → / ← PA14_RS29525:6,461,276:intergenic (+488/+128)	PA14_RS29520	PA14_72510	thrB	homoserine kinase	0.01	0	0	0	-0.2	-0.11	-0.17	-0.05	0.02	0.16	0	0	0.17	0	0	0	0.2	0.11	0	0	0	0.17	0.17	0.15	0	0.12	0.17
rpsF ← / ← rlmB:5,809,311:intergenic (‑197/+22)	rpsF	PA14_65180	rpsF	30S ribosomal protein S6	0.01	0.37	-0.05	-0.04	-0.34	0.03	0.03	-0.04	0.44	0.41	0	0.41	0.42	0.37	0.36	0.29	0.34	0.36	0.25	0	0.39	0.45	0.41	0	0.48	0.37	0.44
PA14_RS09685 →:2,078,154:*181C (TGA→TGT)	PA14_RS09685	PA14_23900	cvpA	hypothetical protein	0.01	0	0.06	-0.03	-0.06	0.02	0.1	-0.06	0	0.06	0	0.08	0.07	0	0.14	0.11	0.06	0.06	0.08	0	0.08	0	0.06	0	0.1	0	0
PA14_RS05280 → / → PA14_RS05285:1,128,157:intergenic (+18/‑43)	PA14_RS05280	PA14_13130		hypothetical protein	0.01	0	0.82	-0.83	0.81	0.06	-0.84	-0.82	-0.81	0.84	0	0	0.85	0	0.82	0.83	0	0.81	0	0.81	0.87	0.84	0.82	0.81	0	0	0
PA14_RS26840 → / ← thiC:5,853,123:intergenic (+24/+35)	PA14_RS26840	PA14_65720		lipoprotein	0.01	-0.03	0.07	0	0.01	0.04	0.04	-0.1	0.13	0.27	0.28	0.31	0.28	0.25	0.38	0.41	0.26	0.31	0.41	0.27	0.35	0.3	0.39	0.31	0.34	0.29	0.44
PA14_RS04150 ←:883,907:A127P (GCC→CCC)	PA14_RS04150	PA14_10260		dehydrogenase E1 component	0.01	0	0.04	-0.05	-0.09	0.12	0.08	-0.07	-0.22	0.29	0	0.2	0.3	0	0.24	0.24	0.26	0.23	0.19	0.17	0.35	0.21	0.3	0.22	0.29	0.23	0
PA14_RS12940 ←:2,747,124:S431C (AGT→TGT)	PA14_RS12940	PA14_31620		hypothetical protein	0.01	-0.02	0.02	0	0.14	-0.01	-0.11	-0.17	-0.17	0.15	0.14	0.1	0.16	0.12	0.12	0	0	0.14	0	0.14	0.13	0.11	0.17	0.17	0	0	0
PA14_RS11805 →:2,505,479:W31G (TGG→GGG)	PA14_RS11805	PA14_28980		Fe2+-dicitrate sensor	0.01	0.02	0.01	-0.02	0.05	0.01	-0.12	0.05	-0.01	0.12	0.13	0.12	0.13	0.15	0.13	0.14	0.11	0.17	0.12	0.16	0.18	0.12	0.1	0.14	0	0.15	0.13
eat ← / ← PA14_RS04780:1,022,416:intergenic (‑168/+42)	PA14_RS04780	PA14_11810		aldehyde dehydrogenase	0.01	-0.05	0.01	0.09	-0.06	0.35	0.09	-0.27	0.22	0.21	0.21	0.18	0.22	0.16	0.19	0.17	0.29	0	0.26	0.23	0.35	0.22	0.27	0	0.31	0	0.22
PA14_RS05365 →:1,146,604:L116R (CTG→CGG)	PA14_RS05365	PA14_13340		extracellular nuclease	0.01	0.16	0	0	-0.16	0.11	0.05	0.16	0	0.16	0	0	0.17	0.16	0	0	0.16	0.16	0	0	0.27	0.12	0	0	0.17	0.16	0
PA14_RS03275 →:701,007:A113A (GCG→GCA)	PA14_RS03275	PA14_08160		lytic enzyme	0.01	-0.14	0	0.05	-0.11	-0.19	0	0	0	0.13	0.3	0.14	0.14	0.16	0.14	0.14	0.28	0.33	0.19	0.17	0.14	0	0	0	0	0	0
PA14_RS03275 →:701,010:S114S (TCC→TCG)	PA14_RS03275	PA14_08160		lytic enzyme	0.01	-0.15	0	0.05	-0.11	-0.19	0	0	0	0.13	0.31	0.14	0.14	0.16	0.14	0.14	0.28	0.33	0.19	0.17	0.14	0	0	0	0	0	0
PA14_RS03275 →:701,004:E112E (GAA→GAG)	PA14_RS03275	PA14_08160		lytic enzyme	0.01	-0.15	-0.02	0.05	-0.12	-0.18	0	0	0	0.13	0.31	0.15	0.14	0.16	0.13	0.14	0.28	0.32	0.19	0.16	0.14	0	0	0	0	0	0
PA14_RS03275 →:700,934:L89* (TTG→TAG) ‡	PA14_RS03275	PA14_08160		lytic enzyme	0.01	-0.13	-0.02	0.01	-0.12	-0.11	0	0	0	0.15	0.33	0.17	0.16	0.2	0.15	0.18	0.3	0.28	0.19	0.18	0.17	0	0	0	0	0	0
PA14_RS03275 →:700,938:R90R (CGG→CGC)	PA14_RS03275	PA14_08160		lytic enzyme	0.01	-0.13	-0.02	0.02	-0.12	-0.11	0	0	0	0.16	0.33	0.17	0.17	0.2	0.15	0.17	0.31	0.28	0.19	0.19	0.17	0	0	0	0	0	0
PA14_RS29740 →:6,505,673:V256G (GTG→GGG)	PA14_RS29740	PA14_73050		GTP cyclohydrolase	0.01	-0.01	-0.03	0	-0.08	-0.09	-0.01	0.05	0.01	0.12	0.09	0.13	0.13	0.08	0.1	0.1	0.08	0.09	0.1	0	0	0.07	0.08	0.08	0.06	0.13	0.09
PA14_RS05280 → / → PA14_RS05285:1,128,158:intergenic (+19/‑42)	PA14_RS05280	PA14_13130		hypothetical protein	0.01	0.83	-0.04	-0.87	0.16	0	-0.02	-0.91	-1	0.86	0	0.89	0.87	0.83	0.85	0.87	0.84	1	0	1	1	0.86	0.91	1	0.84	0	0
PA14_RS09370 ← / ← gltS:2,006,550:intergenic (‑204/+25)	PA14_RS09370	PA14_23130		sensory box GGDEF domain-containing protein	0.01	0.08	-0.06	-0.04	-0.04	-0.02	0.04	0.02	0.05	0.25	0.21	0.24	0.26	0.29	0.18	0.19	0.22	0.26	0.15	0.18	0.24	0.19	0.22	0.22	0.23	0.24	0.27
PA14_RS08450 ←:1,812,216:A1487G (GCG→GGG)	PA14_RS08450	PA14_21020		non-ribosomal peptide synthetase	0.01	-0.01	-0.07	0	0	0	-0.09	-0.07	0	0.09	0.11	0.07	0.1	0.1	0	0	0	0	0	0	0	0.09	0.07	0	0	0	0
PA14_RS17500 →:3,832,626:H9H (CAC→CAT)	PA14_RS17500	PA14_43080	vgrG14	VgrG14	0.01	-0.02	-0.01	0.02	0.06	-0.04	-0.03	-0.02	-0.02	0.08	0.11	0.11	0.09	0.09	0.1	0.08	0.07	0.11	0.1	0.13	0.07	0.15	0.12	0.12	0.12	0.1	0.1
ubiA →:6,299,107:L295R (CTG→CGG)	ubiA	PA14_70730	ubiA	4-hydroxybenzoate octaprenyltransferase	0.01	0	-0.06	0	0.09	0.02	0	0.07	0.01	0.07	0	0.06	0.08	0	0	0	0	0.07	0	0.09	0.09	0	0	0.05	0	0.07	0.06
prpC → / → acnD:4,784,429:intergenic (+28/‑103)	prpC	PA14_53950	prpC	methylcitrate synthase	0.01	0	-0.01	-0.11	-0.12	-0.05	0.09	0.1	0.03	0.08	0.11	0.09	0.09	0.11	0.08	0.11	0.12	0.14	0	0	0.09	0	0	0.07	0.09	0.1	0.1
pepN →:2,105,839:V196G (GTC→GGC)	pepN	PA14_24270	pepN	aminopeptidase	0.01	0	0	-0.07	0	-0.09	0	0.08	0	0.07	0	0	0.08	0	0	0.07	0	0.09	0	0	0	0	0	0	0	0.08	0
arcD →:6,093,201:D39A (GAC→GCC)	arcD	PA14_68300	arcD	arginine/ornithine antiporter	0.01	-0.03	0.06	0.09	0.09	-0.04	-0.05	0	0	0.11	0.15	0.12	0.12	0.12	0.18	0	0.12	0.16	0.09	0.21	0.12	0.15	0.15	0.1	0.1	0.15	0.1
PA14_RS15380 ←:3,372,318:S341R (AGC→CGC)	PA14_RS15380	PA14_37820		hypothetical protein	0.01	-0.03	0.08	0.15	0.04	-0.02	0.03	0.02	0.11	0.1	0.16	0.08	0.11	0.13	0.16	0	0.12	0.12	0.15	0.16	0.1	0.13	0.12	0.11	0.16	0.14	0.22
PA14_RS18305 → / → PA14_RS18310:4,015,975:intergenic (+219/‑78)	PA14_RS18305	PA14_45020		oxidoreductase	0.01	0.02	0.05	-0.04	0.03	0.03	-0.07	-0.02	0	0.08	0.07	0.1	0.09	0.09	0.15	0.13	0.08	0.09	0.09	0.11	0.12	0.07	0.12	0.09	0	0.1	0.09
PA14_RS01170 →:258,462:C342G (TGC→GGC)	PA14_RS01170	PA14_02930		oxidoreductase	0.01	0.02	-0.11	-0.12	-0.1	0.02	-0.01	0.11	-0.03	0.08	0.1	0.11	0.09	0.12	0	0.12	0.1	0.09	0	0	0.11	0.08	0	0.11	0.07	0.11	0.08
xylB ←:3,056,380:L102R (CTG→CGG)	xylB				0.01	0.04	0.03	0.02	0.01	-0.01	-0.07	0.02	-0.07	0.17	0.19	0.19	0.18	0.23	0.22	0.19	0.2	0.18	0.21	0.21	0.17	0.19	0.19	0.23	0.12	0.21	0.16
PA14_RS05365 →:1,146,615:S120R (AGC→CGC)	PA14_RS05365	PA14_13340		extracellular nuclease	0.01	0.19	0.02	-0.03	-0.18	0.05	0.08	-0.13	0.06	0.17	0	0.17	0.18	0.19	0.19	0.2	0.18	0.15	0.17	0	0.2	0.1	0.13	0.12	0.18	0	0.18
trbL → / → PA14_RS06215:1,316,005:intergenic (+17/‑50)	PA14_RS06215				0	0	0.42	0	0	0.37	0	0	0.54	0	0	0	0	0	0.42	0	0	0	0	0	0.37	0	0	0	0	0	0.54
preA ←:507,533:H192Q (CAT→CAG)	preA				0	0.41	0.4	0	0.38	0	-0.42	-0.03	0	0	0	0	0	0.41	0.4	0	0	0	0	0.38	0	0.42	0.44	0	0	0.41	0
mscK →:5,922,087:V390D (GTC→GAC)	mscK				0	0	0.25	0	0	0.19	0	0	0	0	0	0	0	0	0.25	0	0	0	0	0	0.19	0	0	0	0	0	0
prpF →:4,788,232:T326P (ACC→CCC)	prpF				0	0.19	0.21	0	0	0	0.19	0.17	0	0	0	0	0	0.19	0.21	0	0	0	0	0	0	0	0	0	0.19	0.17	0
cmoB →:4,816,024:A319G (GCG→GGG)	cmoB				0	0	0.21	0	0	0	-0.19	-0.01	0.19	0	0	0	0	0	0.21	0	0	0	0	0	0	0.19	0.21	0	0	0.2	0.19
tadZ ←:4,991,529:R96G (CGC→GGC) ‡	tadZ				0	-0.27	0.21	0	0.06	0	-0.23	0.01	0.05	0	0.27	0	0	0	0.21	0	0.21	0	0	0.27	0	0.23	0.23	0.18	0	0.24	0.23
rlmM ← / → acnA:3,940,366:intergenic (‑222/‑105)	rlmM				0	0	0.19	0	0	0	0	-0.09	0	0	0	0	0	0	0.19	0	0	0	0	0	0	0	0.09	0	0	0	0
rcpA ←:4,992,335:G247A (GGC→GCC) ‡	rcpA				0	0.16	0.18	0	0	0	0	0	0	0	0	0	0	0.16	0.18	0	0	0	0	0	0	0	0	0	0	0	0
dgcB →:6,351,797:G280A (GGC→GCC)	dgcB				0	0	0.16	0	0	0	0	0	0	0	0	0	0	0	0.16	0	0	0	0	0	0	0	0	0	0	0	0
rcpA ←:4,992,361:G238G (GGC→GGG)	rcpA				0	0.08	0.12	0	0.13	0	0	-0.09	0	0	0	0	0	0.08	0.12	0	0	0	0	0.13	0	0.11	0.09	0	0.11	0	0
pyk →:4,018,238:M307L (ATG→TTG)	pyk				0	0	0.12	-0.15	0	0	0	0	0	0	0	0	0	0	0.12	0.15	0	0	0	0	0	0	0	0	0	0	0
tadZ ←:4,991,527:R96R (CGC→CGG) ‡	tadZ				0	-0.13	0.1	0	0.04	0	-0.09	-0.01	0.04	0	0.13	0	0	0	0.1	0	0.14	0	0	0.18	0	0.09	0.15	0.09	0	0.14	0.13
hflD ←:2,610,201:L200H (CTC→CAC)	hflD				0	0	0.09	0	0	-0.06	0.08	0.07	0	0	0	0	0	0	0.09	0	0	0.06	0	0	0	0	0	0	0.08	0.07	0
oprN ←:2,814,064:Y32N (TAC→AAC)	oprN				0	0	0.09	0	0	0	-0.1	0	0	0	0	0	0	0	0.09	0	0	0	0	0	0	0.1	0	0	0	0	0
rcpA ←:4,992,336:G247R (GGC→CGC) ‡	rcpA				0	0.11	0.08	0	0	0	0	0	0	0	0	0	0	0.11	0.08	0	0	0	0	0	0	0	0	0	0	0	0
dacB ←:2,158,227:V289E (GTA→GAA)	dacB				0	0	0.08	0	0	0	0	0	0	0	0	0	0	0	0.08	0	0	0	0	0	0	0	0	0	0	0	0
rsxG ←:1,629,759:Q32K (CAA→AAA)	rsxG				0	0	0.06	0	0	0	0	0	0	0	0	0	0	0	0.06	0	0	0	0	0	0	0	0	0	0	0	0
yhbY →:5,610,743:L66H (CTC→CAC)	yhbY				0	0	0.06	0	0.08	0	0	0	0	0	0	0	0	0	0.06	0	0	0	0	0.08	0	0	0	0	0	0	0
tnpB →:5,301,571:I28F (ATT→TTT)	tnpB				0	0	0.05	0	0	0	0	0	0	0	0	0	0	0	0.05	0	0	0	0	0	0	0	0	0	0	0	0
vgrG1b →:114,141:E287D (GAA→GAC)	vgrG				0	-0.07	0.05	-0.07	0	0	0	-0.06	-0.06	0	0.07	0	0	0	0.05	0.07	0	0	0	0	0	0	0.06	0.06	0	0	0
tadZ ←:4,991,518:A99A (GCG→GCC)	tadZ				0	-0.15	0.01	0.23	0.23	0	-0.17	-0.12	0.15	0	0.15	0.22	0	0	0.23	0	0	0	0.23	0.23	0	0.17	0.12	0	0	0	0.15
ada ←:3,312,801:Q315P (CAG→CCG)	ada				0	0.2	0	0	0	0	0	0	0	0	0	0	0	0.2	0	0	0	0	0	0	0	0	0	0	0	0	0
pvcC ← / ← pvcB:3,148,900:intergenic (‑36/+16)	pvcC				0	0.18	0	0	0	0	0	0	0	0	0	0	0	0.18	0	0	0	0	0	0	0	0	0	0	0	0	0
dgcB →:6,351,744:Q262H (CAG→CAC)	dgcB				0	0.11	0	0.1	0.04	0	-0.01	-0.08	-0.1	0	0	0	0	0.11	0	0	0.08	0	0.1	0.12	0	0.09	0.08	0.1	0.08	0	0
bamB → / → der:1,267,308:intergenic (+72/‑6)	bamB				0	0.1	0	0	0	0	0	0.07	0	0	0	0	0	0.1	0	0	0	0	0	0	0	0	0	0	0	0.07	0
scpB →:1,984,185:P193P (CCG→CCC)	scpB				0	0.1	0	0	0	0	0	0	0	0	0	0.09	0	0.1	0.09	0	0	0	0	0	0	0	0	0	0	0	0
rfbD →:6,083,629:E41D (GAA→GAC)	rfbD				0	0.09	0	0	0	0	0	0	0	0	0	0	0	0.09	0	0	0	0	0	0	0	0	0	0	0	0	0
dgcB →:6,351,747:P263P (CCG→CCC)	dgcB				0	0.06	0	0	0	0	0	0	0	0	0	0	0	0.06	0	0	0	0	0	0	0	0	0	0	0	0	0
lptB →:5,155,724:M72R (ATG→AGG)	lptB				0	0.06	0	0	0	0	0	0	0	0	0	0	0	0.06	0	0	0	0	0	0	0	0	0	0	0	0	0
sulA ←:2,200,390:A147P (GCC→CCC)	sulA				0	0.05	0	0	0	0.06	0	0	0	0	0	0	0	0.05	0	0	0	0	0	0	0.06	0	0	0	0	0	0
acs ←:4,680,963:P320R (CCG→CGG)	acs				0	0	0	0	-0.08	0	0	0	0	0	0	0	0	0	0	0	0.08	0	0	0	0	0	0	0	0	0	0
adhP →:6,380,127:G32R (GGG→CGG)	adhP				0	0	0	0	0.08	0	0	0	0	0	0	0	0	0	0	0	0	0	0	0.08	0	0	0	0	0	0	0
adk → / → tsaB:1,431,130:intergenic (+60/‑44)	adk				0	0	0	0	0	0	0	0	-0.07	0	0	0	0	0	0	0	0	0	0	0	0	0	0	0.07	0	0	0
alaC ←:5,566,897:R12P (CGC→CCC)	alaC				0	0	0	0	0	0	0	0.07	0	0	0	0	0	0	0	0	0	0	0	0	0	0	0	0	0	0.07	0
armR →:1,392,198:A26A (GCC→GCG)	armR				0	0	0	0	-0.06	0	0	0	0	0	0	0	0	0	0	0	0.06	0	0	0	0	0	0	0	0	0	0
armR →:1,392,243:R41R (CGG→CGC)	armR				0	0	0	-0.09	0	0	-0.09	0.06	0	0	0	0	0	0	0	0.09	0	0	0	0	0	0.09	0	0	0	0.06	0
astA ←:4,670,363:N291T (AAC→ACC)	astA				0	0	0	0	0	0	0	-0.06	0	0	0	0	0	0	0	0	0	0	0	0	0	0	0.06	0	0	0	0
bamB → / → der:1,267,282:intergenic (+46/‑32)	bamB				0	0	0	0	0	-0.17	0	0	0	0	0	0	0	0	0	0	0	0.17	0	0	0	0	0	0	0	0	0
brnQ ←:3,910,556:L137V (CTG→GTG)	brnQ				0	0	0	0	0	0	0	0	-0.08	0	0	0	0	0	0	0	0	0	0	0	0	0	0	0.08	0	0	0
cadA →:3,956,252:G35G (GGC→GGG)	cadA				0	0	0	0	0	0	0	0.07	0.07	0	0	0	0	0	0	0	0	0	0	0	0	0	0	0	0	0.07	0.07
cmoB →:4,816,008:R314G (CGC→GGC)	cmoB				0	0	0	0	0	0	-0.15	-0.16	0	0	0	0	0	0	0	0	0	0	0	0	0	0.15	0.16	0	0	0	0
cmoB →:4,816,009:R314P (CGC→CCC)	cmoB				0	0	0	0	0	0	0	0	-0.11	0	0	0	0	0	0	0	0	0	0	0	0	0	0	0.11	0	0	0
cobG →:2,309,417:Q416K (CAA→AAA)	cobG				0	0	0	0	0	0	-0.11	0	0	0	0	0	0	0	0	0	0	0	0	0	0	0.11	0	0	0	0	0
cra ←:1,563,225:L56R (CTG→CGG)	cra				0	0	0	0	0	0	-0.1	0	0	0	0	0	0	0	0	0	0	0	0	0	0	0.1	0	0	0	0	0
cra ←:1,563,237:Q52P (CAG→CCG)	cra				0	0	0	0	0	0.12	0	0	0	0	0	0	0	0	0	0	0	0	0	0	0.12	0	0	0	0	0	0
cra ←:1,563,272:A40A (GCC→GCG)	cra				0	0	0	0	0	0	0	0	0.11	0	0	0	0	0	0	0	0	0	0	0	0	0	0	0	0	0	0.11
dgcA → / → dgcB:6,350,898:intergenic (+41/‑61)	dgcA				0	0	0	0	0	-0.06	0	0	0	0	0	0	0	0	0	0	0	0.06	0	0	0	0	0	0	0	0	0
dgcA → / → dgcB:6,350,911:intergenic (+54/‑48)	dgcA				0	0	0	0	-0.11	0	0	0	0	0	0	0	0	0	0	0	0.11	0	0	0	0	0	0	0	0	0	0
dgcB →:6,351,739:G261R (GGC→CGC)	dgcB				0	0	0	0	-0.05	-0.06	0	0	0	0	0	0	0	0	0	0	0.05	0.06	0	0	0	0	0	0	0	0	0
dgcB →:6,351,759:K267N (AAG→AAT)	dgcB				0	0	0	0	-0.06	0	0	0	0	0	0	0	0	0	0	0	0.06	0	0	0	0	0	0	0	0	0	0
dgcB →:6,351,767:I270N (ATC→AAC)	dgcB				0	0	0	0	0	0	0	0	0.08	0	0	0	0	0	0	0	0	0	0	0	0	0	0	0	0	0	0.08
dgcB →:6,351,775:M273L (ATG→TTG)	dgcB				0	0	0	0	0	-0.08	0	0	0	0	0	0	0	0	0	0	0	0.08	0	0	0	0	0	0	0	0	0
fieF ←::S298C (AGT→TGT)	fieF				0	0	0	0	0	0	0	0	0	0	0	0	0	0	0	0	0	0	0	0	0	0	0	0	0	0	0
ggt →:4,181,412:A53G (GCG→GGG)	ggt				0	0	0	0	0	-0.15	0	0	0.1	0	0	0	0	0	0	0	0	0.15	0	0	0	0	0.11	0	0	0.11	0.1
gluQRS →:5,575,690:T287N (ACC→AAC)	gluQ				0	0	0	-0.05	0	0	0	0	0	0	0	0	0	0	0	0.05	0	0	0	0	0	0	0	0	0	0	0
gspD ←:4,936,997:R120P (CGC→CCC)	gspD				0	0	0	0	-0.07	0	0	0	0	0	0	0	0	0	0	0	0.07	0	0	0	0	0	0	0	0	0	0
gspD ←:4,937,018:A113G (GCG→GGG)	gspD				0	0	0	0	0	0	0	0.11	0	0	0	0	0	0	0	0	0	0	0	0	0	0	0	0	0	0.11	0
gspE →:2,086,362:T499S (ACC→TCC)	gspE				0	0	0	0	0	0	0.15	0	0.09	0	0	0	0	0	0	0	0	0	0	0	0	0	0	0	0.15	0	0.09
gspF →:2,086,582:A69A (GCA→GCT)	gspF				0	0	0	0	0.07	0	0	0	0	0	0	0	0	0	0	0	0	0	0	0.07	0	0	0	0	0	0	0
guaD →:3,990,305:I12N (ATC→AAC)	guaD				0	0	0	0.07	0	0	0	0	0	0	0	0	0	0	0	0	0	0	0.07	0	0	0	0	0	0	0	0
hemW ← / ← rdgB:443,564:intergenic (‑88/+33)	hemW				0	0	0	0	0	0	0	0.17	0	0	0	0	0	0	0	0	0	0	0	0	0	0	0	0	0	0.17	0
hemW ←:443,141:Q112H (CAG→CAC)	hemW				0	0	0	0	0	0	0	0	-0.07	0	0	0	0	0	0	0	0	0	0	0	0	0	0	0.07	0	0	0
hflD ←:2,610,192:L203Q (CTG→CAG)	hflD				0	0	0	0	0	0	0	0.06	0	0	0	0	0	0	0	0	0	0	0	0	0	0	0	0	0	0.06	0
hflD ←:2,610,223:R193G (CGG→GGG)	hflD				0	0	0	0	0	0	0.06	0	0	0	0	0	0	0	0	0	0	0	0	0	0	0	0	0	0.06	0	0
hflD ←:2,610,237:Q188L (CAG→CTG)	hflD				0	0	0	0	0	0	0	-0.06	0	0	0	0	0	0	0	0	0	0	0	0	0	0	0.06	0	0	0	0
hrpB →:1,082,848:pseudogene (155/2518 nt)	hrpB				0	0	0	0	0	0	0.09	0	0	0	0	0	0	0	0	0	0	0	0	0	0	0	0	0	0.09	0	0
hrpB →:1,082,851:pseudogene (158/2518 nt)	hrpB				0	0	0	0	0	0	0	0	0.06	0	0	0	0	0	0	0	0	0	0	0	0	0	0	0	0	0	0.06
lptG →:1,240,724:D140A (GAT→GCT)	lptG				0	0	0	0	0	0	0	0	0.06	0	0	0	0	0	0	0	0	0	0	0	0	0	0	0	0	0	0.06
ltaE ←:4,665,686:C72S (TGC→AGC)	ltaE				0	0	0	0	0	-0.05	0	0	0	0	0	0	0	0	0	0	0	0.05	0	0	0	0	0	0	0	0	0
map ←:1,462,084:F255Y (TTC→TAC)	map				0	0	0	0	0	0	0	0.05	0	0	0	0	0	0	0	0	0	0	0	0	0	0	0	0	0	0.05	0
mexN ←:4,077,856:G803R (GGC→CGC)	mexN				0	0	0	-0.06	0	0	0	0	0	0	0	0	0	0	0	0.06	0	0	0	0	0	0	0	0	0	0	0
mexN ←:4,077,906:I786N (ATC→AAC)	mexN				0	0	0	-0.07	0	0	0	0	0.09	0	0	0	0	0	0	0.07	0	0	0	0	0	0	0	0	0	0	0.09
mexN ←:4,077,923:M780I (ATG→ATT) ‡	mexN				0	0	0	0	0	0.12	0	0	0	0	0	0	0	0	0	0	0	0	0	0	0.12	0	0	0	0	0	0
mexN ←:4,077,925:M780L (ATG→TTG) ‡	mexN				0	0	0	0	0	0.17	0	0	0	0	0	0	0	0	0	0	0	0	0	0	0.17	0	0	0	0	0	0
mexN ←:4,077,934:S777C (AGC→TGC)	mexN				0	0	0	0	0	-0.07	0	0	0	0	0	0	0	0	0	0	0	0.07	0	0	0	0	0	0	0	0	0
mexN ←:4,077,943:S774A (TCG→GCG)	mexN				0	0	0	0	0	0	0	0	-0.06	0	0	0	0	0	0	0	0	0	0	0	0	0	0	0.06	0	0	0
muxC →:2,778,409:N650K (AAT→AAG)	muxC				0	0	0	0	0	0.11	0	0	0	0	0	0	0	0	0	0	0	0	0	0	0.11	0	0	0	0	0	0
PA14_RS00530 ←:124,638:P95R (CCG→CGG)	PA14_RS00530				0	0	0	0	0	0	0	0	-0.12	0	0	0	0	0	0	0	0	0	0	0	0	0	0	0.12	0	0	0
PA14_RS00530 ←:124,647:L92H (CTC→CAC)	PA14_RS00530				0	0	0	0	0	0	0	0	-0.14	0	0	0	0	0	0	0	0	0	0	0	0	0	0	0.14	0	0	0
PA14_RS00530 ←:124,656:Q89L (CAG→CTG)	PA14_RS00530				0	0	0	0	0	-0.07	0	0	0	0	0	0	0	0	0	0	0	0.07	0	0	0	0	0	0	0	0	0
PA14_RS05075 →:1,081,112:R213P (CGG→CCG)	PA14_RS05075				0	0	0	0	0	0	-0.08	0	0	0	0	0	0	0	0	0	0	0	0	0	0	0.08	0	0	0	0	0
PA14_RS05075 →:1,081,156:*228R (TGA→AGA)	PA14_RS05075				0	0	0	0	0.06	0	0.07	-0.07	0	0	0	0	0	0	0	0	0	0	0	0.06	0	0	0.07	0	0.07	0	0
PA14_RS06215 → / ← PA14_RS06220:1,316,366:intergenic (+81/+138)	PA14_RS06215				0	0	0	0	0	0	0	0	0.09	0	0	0	0	0	0	0	0	0	0	0	0	0	0	0	0	0	0.09
PA14_RS12715 ←:2,704,367:A123P (GCC→CCC)	PA14_RS12715				0	0	0	-0.07	0	0	0	0	0	0	0	0	0	0	0	0.07	0	0	0	0	0	0	0	0	0	0	0
PA14_RS12715 ←:2,704,372:L121R (CTG→CGG)	PA14_RS12715				0	0	0	0	0.09	0	0	0	0	0	0	0	0	0	0	0	0	0	0	0.09	0	0	0	0	0	0	0
PA14_RS12715 ←:2,704,378:L119R (CTG→CGG)	PA14_RS12715				0	0	0	0	0.09	0	0	0	0.08	0	0	0	0	0	0	0	0	0	0	0.09	0	0	0	0	0	0	0.08
PA14_RS12715 ←:2,704,690:A15G (GCG→GGG)	PA14_RS12715				0	0	0	0	0	0	0	0	-0.06	0	0	0	0	0	0	0	0	0	0	0	0	0	0	0.06	0	0	0
PA14_RS12730 ←:2,705,904:*286L (TAA→TTA)	PA14_RS12730				0	0	0	0	0	0	0	0.07	0	0	0	0	0	0	0	0	0	0	0	0	0	0	0	0	0	0.07	0
PA14_RS12755 ← / ← PA14_RS12760:2,710,545:intergenic (‑654/+127)	PA14_RS12755				0	0	0	0	0	0	0	0	-0.18	0	0	0	0	0	0	0	0	0	0	0	0	0	0	0.18	0	0	0
PA14_RS12755 ← / ← PA14_RS12760:2,710,607:intergenic (‑716/+65)	PA14_RS12755				0	0	0	0	0	0	0.07	0.13	0	0	0	0	0	0	0	0	0	0	0	0	0	0.09	0	0	0.16	0.13	0
PA14_RS12755 ←:2,709,587:K102R (AAG→AGG)	PA14_RS12755				0	0	0	0	0	0	0	0.06	0	0	0	0	0	0	0	0	0	0	0	0	0	0	0	0	0	0.06	0
PA14_RS14130 → / ← PA14_RS14135:3,085,242:intergenic (+29/+47)	PA14_RS14130				0	0	0	0	0.11	0	0	0	0	0	0	0	0	0	0	0	0	0	0	0.11	0	0	0	0	0	0	0
PA14_RS14130 → / ← PA14_RS14135:3,085,245:intergenic (+32/+44)	PA14_RS14130				0	0	0	0	0.07	0	0	0	0	0	0	0	0	0	0	0	0	0	0	0.07	0	0	0	0	0	0	0
PA14_RS30715 ← / → PA14_RS18910:4,146,130:intergenic (‑96/‑7)	PA14_RS30715				0	0	0	0	0	0	0	0	-0.1	0	0	0	0	0	0	0	0	0	0	0	0	0	0	0.1	0	0	0
PA14_RS31160 → / → PA14_RS19915:4,355,748:intergenic (+275/‑101)	PA14_RS31160				0	0	0	0	0	0	0	-0.05	0	0	0	0	0	0	0	0	0	0	0	0	0	0	0.05	0	0	0	0
PA14_RS31165 →:53,589:G109R (GGT→CGT)	PA14_RS31165				0	0	0	0.05	0	0	0	0	0	0	0	0	0	0	0	0	0	0	0.05	0	0	0	0	0	0	0	0
pdhA →:1,715,351:L229V (CTG→GTG)	pdhA				0	0	0	0	-0.07	0	0	0	0	0	0	0	0	0	0	0	0.07	0	0	0	0	0	0	0	0	0	0
pdhA →:1,715,392:A242A (GCG→GCC)	pdhA				0	0	0	0	0	0	-0.06	0	0	0	0	0	0	0	0	0	0	0	0	0	0	0.06	0	0	0	0	0
pfkB →:1,566,819:G77G (GGC→GGG)	pfkB				0	0	0	0	0	0	0	0	0.13	0	0	0	0	0	0	0	0	0	0	0	0	0	0	0	0	0	0.13
phrB →:5,500,008:L60V (CTG→GTG)	phrB				0	0	0	0.07	0	0	0	0	0	0	0	0	0	0	0	0	0	0	0.07	0	0	0	0	0	0	0	0
phzC ←:3,559,772:A309T (GCG→ACG)	phzC				0	0	0	0	0	0	0	0	0.06	0	0	0	0	0	0	0	0	0	0	0	0	0	0	0	0	0	0.06
pmpM →:4,161,513:A282G (GCC→GGC)	pmpM				0	0	0	0	0	0	0	0	0.14	0	0	0	0	0	0	0	0	0	0	0	0	0	0	0	0	0	0.14
ppc →:1,430,260:*879G (TGA→GGA)	ppc				0	0	0	0	0	0	0	-0.06	0	0	0	0	0	0	0	0	0	0	0	0	0	0	0.06	0	0	0	0
preA ←:507,523:A196P (GCC→CCC)	preA				0	0	0	0	0.19	0	-0.31	0	0	0	0	0	0	0	0	0	0	0	0	0.19	0	0.31	0	0	0	0	0
preA ←:507,534:H192P (CAT→CCT)	preA				0	0	0	0	0	-0.23	0	0	-0.19	0	0	0	0	0	0	0	0	0.23	0	0	0	0	0	0.19	0	0	0
pvdT ←:2,999,868:I207N (ATC→AAC)	pvdT				0	0	0	0	0	0	0.1	0	0	0	0	0	0	0	0	0	0	0	0	0	0	0	0	0	0.1	0	0
pvdT ←:3,000,122:G122G (GGC→GGA)	pvdT				0	0	0	0.07	0	0	0	0	0	0	0	0	0	0	0	0	0	0	0.07	0	0	0	0	0	0	0	0
pyk →:4,018,232:A305P (GCG→CCG)	pyk				0	0	0	0	0	0.09	0	0	0	0	0	0	0	0	0	0	0	0	0	0	0.09	0	0	0	0	0	0
rapA ←:1,838,133:S665R (AGC→AGG)	rapA				0	0	0	0	0	0	-0.08	0	0	0	0	0	0	0	0	0	0	0	0	0	0	0.08	0	0	0	0	0
rbbA ←:6,161,759:L96H (CTC→CAC)	rbbA				0	0	0	0	-0.11	0	0	0	0	0	0	0	0	0	0	0	0.11	0	0	0	0	0	0	0	0	0	0
rlmKL →:2,156,196:pseudogene (783/2179 nt)	rlmK				0	0	0	0	0	0	0	0.07	0	1	1	1	1	1	1	1	1	1	1	1	1	1	0.93	1	1	1	1
rlmKL →:2,156,257:pseudogene (844/2179 nt)	rlmK				0	0	0	0	0	0	0	0.05	0	0	0	0	0	0	0	0	0	0	0	0	0	0	0	0	0	0.05	0
rnr ←:5,810,442:S786R (AGT→AGA)	rnr				0	0	0	0	0	0	0	0.12	0	0	0	0	0	0	0	0	0	0	0	0	0	0	0	0	0	0.12	0
rnr ←:5,812,566:G78G (GGC→GGG)	rnr				0	0	0	0.13	0	0	0	0	0	0	0	0	0	0	0	0	0	0	0.13	0	0	0	0	0	0	0	0
rseP →:1,469,541:A134G (GCG→GGG)	rseP				0	0	0	0	0	0	0	0	0.06	0	0	0	0	0	0	0	0	0	0	0	0	0	0	0	0	0	0.06
ruvX ←:461,476:G12G (GGC→GGG)	ruvX				0	0	0	0	0	0	0	-0.06	0	0	0	0	0	0	0	0	0	0	0	0	0	0	0.06	0	0	0	0
ruvX ←:461,497:K5N (AAG→AAC)	ruvX				0	0	0	0	0	0	0	0.06	0	0	0	0	0	0	0	0	0	0	0	0	0	0	0	0	0	0.06	0
scpB →:1,984,167:E187D (GAA→GAT)	scpB				0	0	0	0	0	-0.12	0	0	0	0	0	0	0	0	0	0	0	0.12	0	0	0	0	0	0	0	0	0
tadZ ←:4,991,520:A99P (GCG→CCG)	tadZ				0	0	0	0	0	0.1	0	0	0	0	0	0	0	0	0	0	0	0	0	0	0.1	0	0	0	0	0	0
tadZ ←:4,991,550:Q89E (CAG→GAG)	tadZ				0	0	0	0	0	0	0	0.15	0	0	0	0	0	0	0	0	0	0	0	0	0	0	0	0	0	0.15	0
tadZ ←:4,991,571:I82F (ATC→TTC)	tadZ				0	0	0	0.06	0	0	0	0	0	0	0	0	0	0	0	0	0	0	0.06	0	0	0	0	0	0	0	0
tadZ ←:4,991,608:G69G (GGA→GGT)	tadZ				0	0	0	0	0	0	0	0.05	0	0	0.08	0	0	0.08	0	0	0	0	0	0	0	0	0	0	0	0.05	0
tagH ←:96,548:pseudogene (862/1499 nt)	tagH				0	0	0	0	0	0	-0.06	-0.05	0	0	0	0	0	0	0	0	0	0	0	0	0	0.06	0.05	0	0	0	0
tcdA ←:4,384,905:M244L (ATG→TTG)	tcdA				0	0	0	0	0	0	0	0.05	0	0	0	0	0	0	0	0	0	0	0	0	0	0	0	0	0	0.05	0
tnpB →:5,301,597:P36P (CCG→CCC)	tnpB				0	0	0	-0.08	0	0	0	0.09	0	0	0	0	0	0	0	0.08	0	0	0	0	0	0	0	0	0	0.09	0
tpsA4 →:5,248,369:N472K (AAT→AAA)	tpsA				0	0	0	0	0	0	0	-0.05	0	0	0	0	0	0	0	0	0	0	0	0	0	0	0.05	0	0	0	0
triA →:176,219:A18G (GCG→GGG)	triA				0	0	0	0	0	-0.09	0	0	0	0	0	0	0	0	0	0	0	0.09	0	0	0	0	0	0	0	0	0
triA →:176,259:C31W (TGC→TGG)	triA				0	0	0	0	0.1	-0.07	0	0	0	0	0	0	0	0	0	0	0	0.07	0	0.1	0	0	0	0	0	0	0
tsaA ←:1,746,101:I21N (ATC→AAC)	tsaA				0	0	0	0	0	0.15	0	0	0	0	0	0	0	0	0	0	0	0	0	0	0.15	0	0	0	0	0	0
tssC ←:3,029,105:S13C (AGT→TGT)	tssC				0	0	0	0	0	0	-0.05	0	0	0	0	0	0	0	0	0	0	0	0	0	0	0.05	0	0	0	0	0
tssF →:103,899:K296N (AAG→AAC)	tssF				0	0	0	-0.11	0	0	0	-0.07	0	0	0	0	0	0	0	0.11	0	0	0	0	0	0	0.07	0	0	0	0
tssG →:105,242:A136A (GCC→GCG)	tssG				0	0	0	0	0	0	0	-0.05	0	0	0	0	0	0	0	0	0	0	0	0	0	0	0.05	0	0	0	0
tssJ ←:95,728:A47P (GCG→CCG)	tssJ				0	0	0	0.18	0	0	0	0	0	0	0	0	0	0	0	0	0	0	0.18	0	0	0	0	0	0	0	0
tssJ ←:95,788:R27G (CGG→GGG)	tssJ				0	0	0	0	0	0	0	0	0.05	0	0	0	0	0	0	0	0	0	0	0	0	0	0	0	0	0	0.05
tssM ←:3,813,089:A885P (GCC→CCC)	tssM				0	0	0	0	0.09	0	0	0	0	0	0	0	0	0	0	0	0	0	0	0.09	0	0	0	0	0	0	0
tssM ←:3,813,115:Q876L (CAG→CTG)	tssM				0	0	0	0	0	0	0	0	-0.09	0	0	0	0	0	0	0	0	0	0	0	0	0	0	0.09	0	0	0
tssM ←:3,813,269:A825P (GCC→CCC)	tssM				0	0	0	0	0	-0.13	0	0	0	0	0	0	0	0	0	0	0	0.13	0	0	0	0	0	0	0	0	0
tssM ←:3,813,356:L796V (CTG→GTG)	tssM				0	0	0	0.07	0	0	0	0	0	0	0	0	0	0	0	0	0	0	0.07	0	0	0	0	0	0	0	0
ugpC →:1,996,565:V365G (GTG→GGG)	ugpC				0	0	0	0.01	0	0	0	0	0	0	0	0	0	0	0	0.06	0	0	0.07	0	0	0	0	0	0	0	0
ugpC →:1,996,570:T367P (ACG→CCG)	ugpC				0	0	0	-0.07	0	0	-0.06	0	0	0	0	0	0	0	0	0.07	0	0	0	0	0	0.06	0	0	0	0	0
urtC →:5,730,718:G202A (GGC→GCC)	urtC				0	0	0	0	0	0	0	0	-0.06	0	0	0	0	0	0	0	0	0	0	0	0	0	0	0.06	0	0	0
xth ←:853,909:V100G (GTC→GGC)	xth				0	0	0	0	0.09	0	0	0	0	0	0	0	0	0	0	0	0	0	0	0.09	0	0	0	0	0	0	0
xylB ←:3,056,090:W199G (TGG→GGG)	xylB				0	0	0	0	0	0	0	-0.09	0	0	0	0	0	0	0	0	0	0	0	0	0	0	0.09	0	0	0	0
xylB ←:3,056,099:R196G (CGG→GGG)	xylB				0	0	0	0	0	0	-0.11	0	0	0	0	0	0	0	0	0	0	0	0	0	0	0.11	0	0	0	0	0
xylB ←:3,056,100:R195R (CGC→CGG) ‡	xylB				0	0	0	0	0	-0.1	0	-0.11	0	0	0	0	0	0	0	0	0	0.1	0	0	0	0	0.11	0	0	0	0
xylB ←:3,056,102:R195G (CGC→GGC) ‡	xylB				0	0	0	0	0	-0.22	0	-0.16	0	0	0	0	0	0	0	0	0	0.22	0	0	0	0	0.16	0	0	0	0
yedA ←:5,643,308:T88S (ACG→TCG)	yedA				0	0	0	0	0	0	0	0.06	0	0	0	0	0	0	0	0	0	0	0	0	0	0	0	0	0	0.06	0
yedA ←:5,643,374:W66R (TGG→AGG)	yedA				0	0	0	0	0	0	-0.08	0	0	0	0	0	0	0	0	0	0	0	0	0	0	0.08	0	0	0	0	0
yhbY →:5,610,714:R56R (CGC→CGG)	yhbY				0	0	0	0	0	0	0	0.06	0.06	0	0	0	0	0	0	0	0	0	0	0	0	0	0	0	0	0.06	0.06
yhbY →:5,610,716:D57V (GAC→GTC)	yhbY				0	0	0	0	0	0	0	0.06	0.06	0	0	0	0	0	0	0	0	0	0	0	0	0	0	0	0	0.06	0.06
rfbD →:6,083,951:S149C (AGT→TGT)	rfbD				0	-0.01	0	0	0	0	0	0	-0.07	0	0.08	0	0	0.07	0	0	0	0	0	0	0	0	0	0.07	0	0	0
cra ←:1,563,277:L39V (CTT→GTT)	cra				0	-0.02	0	0	0	0	-0.06	0	0.09	0	0.11	0	0	0.09	0	0	0	0	0	0	0	0.06	0	0	0	0	0.09
PA14_RS25835 ←:5,639,001:F38L (TTC→TTG)	PA14_RS25835				0	-0.07	0	0	0	0	0	0	0	0	0.07	0	0	0	0	0	0	0	0	0	0	0	0	0	0	0	0
rbbA ←:6,161,985:T21S (ACG→TCG)	rbbA				0	-0.07	0	0	0	0	0	0	0	0	0.07	0	0	0	0	0	0	0	0	0	0	0	0	0	0	0	0
tpx →:2,767,353:C94W (TGC→TGG)	tpx				0	-0.07	0	0	0	0	0	0	0	0	0.07	0	0	0	0	0	0	0	0	0	0	0	0	0	0	0	0
xylB ←:3,055,897:I263N (ATC→AAC)	xylB				0	-0.07	0	0	0	0	0	0	0	0	0.07	0	0	0	0	0	0	0	0	0	0	0	0	0	0	0	0
mexY →:3,423,640:L250R (CTG→CGG)	mexY				0	-0.08	0	0	0	0	0	0	0	0	0.08	0	0	0	0	0	0	0	0	0	0	0	0	0	0	0	0
rhtA ←:4,162,499:C160W (TGC→TGG)	rhtA				0	-0.08	0	-0.09	-0.05	0	0	0.08	-0.06	0	0.08	0	0	0	0	0.09	0.05	0	0	0	0	0	0	0.06	0	0.08	0
tnpB →:5,301,565:R26G (CGG→GGG)	tnpB				0	-0.08	0	0	0	0	0.06	0	0	0	0.08	0	0	0	0	0	0	0	0	0	0	0	0	0	0.06	0	0
rcpA ←:4,992,336:G247R (GGC→CGC)	rcpA				0	-0.1	0	0	0	-0.11	0	-0.15	-0.07	0	0.1	0	0	0	0	0	0	0.11	0	0	0	0	0.15	0.07	0	0	0
cadA →:3,956,243:C32W (TGC→TGG)	cadA				0	-0.11	0	0	0.08	0.12	0.01	0.04	0.01	0	0.11	0	0	0	0	0	0	0	0	0.08	0.12	0.11	0.07	0.08	0.12	0.11	0.09
muxC →:2,778,429:L657R (CTG→CGG)	muxC				0	-0.11	0	0	0	0	0	0	0	0	0.11	0	0	0	0	0	0	0	0	0	0	0	0	0	0	0	0
rlmM ← / → acnA:3,940,357:intergenic (‑213/‑114)	rlmM				0	-0.11	0	0.02	0.05	0.01	-0.01	-0.07	0.03	0	0.11	0	0	0	0	0.11	0.18	0.16	0.13	0.23	0.17	0.11	0.16	0.13	0.1	0.09	0.16
cra ←:1,563,224:L56L (CTG→CTC)	cra				0	-0.12	0	0	0	0	0	0	0	0	0.12	0	0	0	0	0	0	0	0	0	0	0	0	0	0	0	0
dgcA → / → dgcB:6,350,906:intergenic (+49/‑53)	dgcA				0	-0.14	0	0	0	0	-0.09	0	0	0	0.14	0	0	0	0	0	0	0	0	0	0	0.09	0	0	0	0	0
xylB ←:3,056,100:R195R (CGC→CGG)	xylB				0	-0.14	0	0	0	0	0	0	0	0	0.14	0	0	0	0	0	0	0	0	0	0	0	0	0	0	0	0
aitP →:4,225,902:L67V (CTG→GTG)	aitP				0	0	-0.05	0	0	0	0	0.06	0	0	0	0.05	0	0	0	0	0	0	0	0	0	0	0	0	0	0.06	0
feoA ← / ← PA14_RS23105:5,051,114:intergenic (‑58/+159)	PA14_RS23105				0	0	-0.05	0	0	0	0	0	0	0	0	0.05	0	0	0	0	0	0	0	0	0	0	0	0	0	0	0
armR →:1,392,242:R41P (CGG→CCG) ‡	armR				0	0	-0.06	0	0	0	0	0	0	0	0	0.06	0	0	0	0	0	0	0	0	0	0	0	0	0	0	0
cadA →:3,956,220:L25V (CTC→GTC)	cadA				0	0	-0.06	0	0	0	0	0.05	0	0	0	0.06	0	0	0	0	0	0	0	0	0	0	0	0	0	0.05	0
guaD →:3,990,283:A5P (GCC→CCC)	guaD				0	0	-0.06	0	0.07	0	0.06	0	0	0	0	0.06	0	0	0	0.06	0	0	0.06	0.07	0	0	0	0	0.06	0	0
guaD →:3,990,296:R9P (CGC→CCC)	guaD				0	0	-0.06	-0.06	0	0	0	0	0	0	0	0.06	0	0	0	0.06	0	0	0	0	0	0	0	0	0	0	0
rfbA →:6,084,753:Y114* (TAC→TAA)	rfbA				0	0	-0.06	0	0	0	0	0	0	0	0	0.06	0	0	0	0	0	0	0	0	0	0	0	0	0	0	0
triA →:176,231:I22N (ATC→AAC)	triA				0	0	-0.06	0	0	0	0	0	0	0	0	0.06	0	0	0	0	0	0	0	0	0	0	0	0	0	0	0
hrpB →:1,082,845:pseudogene (152/2518 nt)	hrpB				0	0	-0.07	0	0	0	-0.06	0	0	0	0	0.07	0	0	0	0	0	0	0	0	0	0.06	0	0	0	0	0
mexQ →:1,617,349:V623L (GTG→CTG)	mexQ				0	0	-0.07	0	0	0	0	0	0	0	0	0.07	0	0	0	0	0	0	0	0	0	0	0	0	0	0	0
rfbD →:6,083,576:L24V (CTG→GTG)	rfbD				0	0	-0.07	0	0	0	-0.07	0	0	0	0	0.07	0	0	0	0	0	0	0	0	0	0.07	0	0	0	0	0
rnr ←:5,812,559:A81P (GCG→CCG)	rnr				0	0	-0.07	0	0	0	0	0	0	0	0	0.07	0	0	0	0	0	0	0	0	0	0	0	0	0	0	0
tnpB →:5,301,575:A29G (GCG→GGG)	tnpB				0	0	-0.07	0	0	-0.12	0	0.12	0	0	0	0.07	0	0	0	0	0	0.12	0	0	0	0	0	0	0	0.12	0
tpx →:2,767,348:F93V (TTC→GTC)	tpx				0	0	-0.08	0.11	-0.14	-0.16	0	0	0	0	0	0.08	0	0	0	0	0.14	0.16	0.11	0	0	0	0	0	0	0	0
tssM ←:3,813,148:L865H (CTC→CAC)	tssM				0	0	-0.08	0.1	0	0	0	0	-0.08	0	0	0.08	0	0	0	0	0	0	0.1	0	0	0	0	0.08	0	0	0
cmoB →:4,816,016:T316T (ACG→ACC) ‡	cmoB				0	0.14	-0.09	0	0	0	0	0.14	-0.16	0	0	0.09	0	0.14	0	0	0	0	0	0	0	0	0	0.16	0	0.14	0
sulA ←:2,200,344:*162L (TGA→TTA)	sulA				0	0.12	-0.09	0.09	-0.13	-0.03	0	-0.01	0.04	0	0	0.09	0	0.12	0	0	0.13	0.12	0.09	0	0.09	0.08	0.11	0.07	0.08	0.1	0.11
hrpB →:1,082,861:pseudogene (168/2518 nt)	hrpB				0	0.01	-0.09	0	-0.1	-0.02	-0.01	-0.09	-0.01	0.09	0.08	0.09	0.09	0.09	0	0	0.1	0.11	0	0	0.09	0.1	0.09	0.07	0.09	0	0.06
armR →:1,392,243:R41R (CGG→CGC) ‡	armR				0	0	-0.09	0	0	0	0	0	0	0	0	0.09	0	0	0	0	0	0	0	0	0	0	0	0	0	0	0
PA14_RS12715 ←:2,704,393:Q114P (CAG→CCG)	PA14_RS12715				0	0	-0.09	0	0	0.08	0	0	0	0	0	0.09	0	0	0	0	0	0	0	0	0.08	0	0	0	0	0	0
xylB ←:3,056,093:T198P (ACC→CCC)	xylB				0	0.14	-0.11	0	-0.14	0	0	0	0	0	0	0.11	0	0.14	0	0	0.14	0	0	0	0	0	0	0	0	0	0
mexQ →:1,617,334:N618Y (AAC→TAC)	mexQ				0	0	-0.11	0	0	0	0	0	0	0	0	0.11	0	0	0	0	0	0	0	0	0	0	0	0	0	0	0
sulA ←:2,200,398:L144Q (CTG→CAG)	sulA				0	0	-0.11	0	0	0	-0.09	0	0	0	0	0.11	0	0	0	0	0	0	0	0	0	0.09	0	0	0	0	0
sulA ←:2,200,361:L156L (CTG→CTT)	sulA				0	0	-0.12	0	0	0	0	0	0	0	0	0.12	0	0	0	0	0	0	0	0	0	0	0	0	0	0	0
mexN ←:4,077,929:G778G (GGC→GGG)	mexN				0	-0.08	-0.12	0	0.09	-0.03	0	-0.15	0.06	0	0.08	0.12	0	0	0	0.08	0	0.11	0.08	0.09	0.08	0	0.15	0.07	0	0	0.13
PA14_RS25835 ←:5,638,958:A53P (GCC→CCC)	PA14_RS25835				0	0	-0.14	0.15	0	0	0	0	-0.12	0	0	0.14	0	0	0	0	0	0	0.15	0	0	0	0	0.12	0	0	0
ada ←:3,312,804:A314G (GCG→GGG)	ada				0	0	-0.15	0	0	0	0	0	0	0	0	0.15	0	0	0	0	0	0	0	0	0	0	0	0	0	0	0
cmoB →:4,816,014:T316P (ACG→CCG) ‡	cmoB				0	0.08	-0.16	0	0	0	0	0.19	-0.25	0	0	0.16	0	0.08	0	0	0	0	0	0	0	0	0	0.25	0	0.19	0
tpx →:2,767,340:Q90P (CAG→CCG)	tpx				0	0	-0.2	0	0	0	0	0	0	0	0	0.2	0	0	0	0	0	0	0	0	0	0	0	0	0	0	0
tadZ ←:4,991,541:L92V (CTG→GTG)	tadZ				0	0.21	-0.23	0	0.16	-0.1	0	0	0	0	0	0.23	0	0.21	0	0	0	0.24	0	0.16	0.14	0	0	0	0	0	0
preA ←:507,530:R193R (CGC→CGG)	preA				0	-0.16	-0.25	0	0	0	0	0.24	0.2	0	0.16	0.25	0	0	0	0	0	0	0	0	0	0	0	0	0	0.24	0.2
PA14_RS09755 →:2,092,036:I76N (ATC→AAC)	PA14_RS09755	PA14_24100	xcpZ	general secretion pathway protein M	0	0	0	0	0	0	-0.06	0	-0.06	0	0	0	0	0	0	0	0	0	0	0	0	0.06	0	0.06	0	0	0
PA14_RS09755 →:2,092,040:Q77H (CAG→CAC)	PA14_RS09755	PA14_24100	xcpZ	general secretion pathway protein M	0	0	-0.05	0	0	0	0	0	0	0	0	0.05	0	0	0	0	0	0	0	0	0	0	0	0	0	0	0
PA14_RS06615 →:1,413,773:L206V (CTG→GTG)	PA14_RS06615	PA14_16500	wspR	two-component response regulator	0	0	0	0	0	0	0	0	0.08	0	0	0	0	0	0	0	0	0	0	0	0	0	0	0	0	0	0.08
PA14_RS06615 →:1,413,790:D211E (GAC→GAA)	PA14_RS06615	PA14_16500	wspR	two-component response regulator	0	0	0	0	0	-0.14	0	0	0.13	0	0	0	0	0	0	0	0	0.14	0	0	0	0	0	0	0	0	0.13
PA14_RS06615 →:1,413,791:Y212N (TAT→AAT)	PA14_RS06615	PA14_16500	wspR	two-component response regulator	0	0	0	0	0	0	0	0.06	0	0	0	0	0	0	0	0	0	0	0	0	0	0	0	0	0	0.06	0
PA14_RS06615 →:1,413,796:F213L (TTC→TTA)	PA14_RS06615	PA14_16500	wspR	two-component response regulator	0	0	0	0	0	0	0	-0.08	0.11	0	0	0	0	0	0	0	0	0	0	0	0	0	0.08	0	0	0	0.11
PA14_RS06615 →:1,413,803:Y216N (TAC→AAC)	PA14_RS06615	PA14_16500	wspR	two-component response regulator	0	0	0	0	0.04	-0.11	0	0	0.18	0	0	0	0	0	0	0	0.12	0.11	0	0.16	0	0	0	0	0	0	0.18
PA14_RS06615 →:1,413,833:D226H (GAC→CAC) ‡	PA14_RS06615	PA14_16500	wspR	two-component response regulator	0	0	0	0	0	0	-0.1	0	0.05	0	0	0	0	0	0	0	0	0	0	0	0	0.1	0	0.08	0	0	0.13
PA14_RS06615 →:1,413,834:D226A (GAC→GCC) ‡	PA14_RS06615	PA14_16500	wspR	two-component response regulator	0	0	0	0	0	0	-0.11	0	0.02	0	0	0	0	0	0	0	0	0	0	0	0	0.11	0	0.11	0	0	0.13
PA14_RS06615 →:1,413,825:V223G (GTC→GGC)	PA14_RS06615	PA14_16500	wspR	two-component response regulator	0	-0.18	0	0	0.13	0	0	0	0.08	0	0.18	0	0	0	0	0	0	0	0	0.13	0	0	0	0	0	0	0.08
PA14_RS06595 →:1,409,001:H404Q (CAT→CAA)	PA14_RS06595	PA14_16450	wspC	methyltransferase	0	0	0	0	0	0	0	-0.07	0	0	0	0	0	0	0	0	0	0	0	0	0	0	0.07	0	0	0	0
PA14_RS09500 →:2,042,612:coding (1003‑1008/1998 nt)	PA14_RS09500	PA14_23470	wbpM	nucleotide sugar epimerase/dehydratase WbpM	0	0	0	0	0	0	0	0	0	0	0	0	0	0	0	0	0	0	0	0	0	1	1	1	1	1	1
waaA ←:5,876,426:R24G (CGC→GGC)	waaA	PA14_65960	waaA	3-deoxy-D-manno-octulosonic-acid transferase	0	0	0.1	0	0	0	0	0	0	0	0	0	0	0	0.1	0	0	0	0	0	0	0	0	0	0	0	0
waaA ←:5,876,395:R34P (CGC→CCC)	waaA	PA14_65960	waaA	3-deoxy-D-manno-octulosonic-acid transferase	0	0	0	0	0	0.06	0	0	0	0	0	0	0	0	0	0	0	0	0	0	0.06	0	0	0	0	0	0
PA14_RS27430 ←:6,002,143:G654G (GGA→GGT)	PA14_RS27430	PA14_67230	vgrG5	VgrG5	0	0	-0.08	0	0	0	0	0	0	0	0	0.08	0	0	0	0	0	0	0	0	0	0	0	0	0	0	0
PA14_RS27430 ←:6,002,170:P645P (CCG→CCC)	PA14_RS27430	PA14_67230	vgrG5	VgrG5	0	0	-0.09	0	0	0	0	-0.1	0	0	0	0.09	0	0	0	0	0	0	0	0	0	0	0.1	0	0	0	0
PA14_RS01305 ←:288,075:R66R (CGT→CGA)	PA14_RS01305	PA14_03220	vgrG2b	VgrG2b	0	0	0	0	0	0.1	0	0	0	0	0	0	0	0	0	0	0	0	0	0	0.1	0	0	0	0	0	0
PA14_RS26490 →:5,775,155:G233G (GGC→GGG)	PA14_RS26490	PA14_64800	vanA	vanillate O-demethylase oxygenase	0	0.09	0.04	0.09	-0.07	-0.06	0.06	0.12	0	0	0	0.07	0	0.09	0.11	0	0.07	0.06	0.09	0	0	0.08	0	0	0.14	0.12	0
PA14_RS05770 ← / ← PA14_RS05775:1,234,538:intergenic (‑105/+16)	PA14_RS05770	PA14_14440	valS	valyl-tRNA synthetase	0	0	0	0	0	0	0	0	1	0	0	0	0	0	0	0	0	0	0	0	0	0	0	0	0	0	1
PA14_RS05770 ← / ← PA14_RS05775:1,234,542:intergenic (‑109/+12)	PA14_RS05770	PA14_14440	valS	valyl-tRNA synthetase	0	0	0	0	0	0	1	-1	0	0	0	0	0	0	0	0	0	0	0	0	0	0	1	0	1	0	0
uvrD →:6,406,101:E698D (GAA→GAC)	uvrD	PA14_71870	uvrD	DNA-dependent helicase II	0	0	0	0	0	0	0.14	0	0	0	0	0	0	0	0	0	0	0	0	0	0	0	0	0	0.14	0	0
PA14_RS26300 →:5,735,374:G86G (GGC→GGA)	PA14_RS26300	PA14_64370	ureB	urease subunit beta	0	0	0	-0.05	0	0	0	0	0	0	0	0	0	0	0	0.05	0	0	0	0	0	0	0	0	0	0	0
PA14_RS09400 ← / ← PA14_RS09405:2,011,976:intergenic (‑130/+21)	PA14_RS09400	PA14_23220	ubiG	3-demethylubiquinone-9 3-methyltransferase	0	0	0	0	-0.09	0	0.09	-0.08	0	0	0	0	0	0	0	0	0.09	0	0	0	0	0	0.08	0	0.09	0	0
PA14_RS09400 ← / ← PA14_RS09405:2,011,982:intergenic (‑136/+15)	PA14_RS09400	PA14_23220	ubiG	3-demethylubiquinone-9 3-methyltransferase	0	-0.07	0	0	0	0	-0.07	0	0	0	0.07	0	0	0	0	0	0	0	0	0	0	0.07	0	0	0	0	0
ubiA →:6,299,092:V290G (GTC→GGC)	ubiA	PA14_70730	ubiA	4-hydroxybenzoate octaprenyltransferase	0	0	0	0.07	0	0	0	0	0	0	0	0	0	0	0	0	0	0	0.07	0	0	0	0	0	0	0	0
PA14_RS04210 → / ← PA14_RS04215:899,933:intergenic (+24/+5)	PA14_RS04210	PA14_10420	tyrS	tyrosyl-tRNA synthetase	0	0.08	0	0	0	0	0	0	0	0	0	0	0	0.08	0	0	0	0	0	0	0	0	0	0	0	0	0
PA14_RS00395 ←:93,857:D63D (GAC→GAT)	PA14_RS00395	PA14_00925	tssL1	TssL1	0	-0.06	0	0	0	0	0	0	0	0	0.06	0	0	0	0	0	0	0	0	0	0	0	0	0	0	0	0
truA →:2,072,909:E11Q (GAA→CAA)	truA	PA14_23840	truA	tRNA pseudouridine synthase A	0	0	0	0.09	0	0	0	0	0	0	0	0	0	0	0	0	0	0	0.09	0	0	0	0	0	0	0	0
PA14_RS00190 →:39,833:P204R (CCG→CGG)	PA14_RS00190	PA14_00460	trpI	transcriptional regulator TrpI	0	0	0	0	0	0	0	0	-0.12	0	0	0	0	0	0	0	0	0	0	0	0	0	0	0.12	0	0	0
PA14_RS00190 →:39,844:A208P (GCG→CCG)	PA14_RS00190	PA14_00460	trpI	transcriptional regulator TrpI	0	0	0	0	0	0	0	0	-0.1	0	0	0	0	0	0	0	0	0	0	0	0	0	0	0.1	0	0	0
PA14_RS00190 →:39,847:S209R (AGC→CGC)	PA14_RS00190	PA14_00460	trpI	transcriptional regulator TrpI	0	0	0	0	0	0	0	0.11	0	0	0	0	0	0	0	0	0	0	0	0	0	0	0	0	0	0.11	0
trkA ←:17,648:L372R (CTG→CGG)	trkA	PA14_00170	trkA	potassium transporter peripheral membrane protein	0	0	0	0	-0.16	0	0	0	-0.15	0	0	0	0	0	0	0	0.16	0	0	0	0	0	0	0.15	0	0	0
PA14_RS11105 → / ← PA14_RS11110:2,384,239:intergenic (+16/+16)	PA14_RS11105	PA14_27460	tpm	thiopurine S-methyltransferase	0	0	0.37	0	0	0	0	0	0	0	0	0	0	0	0.37	0	0	0	0	0	0	0	0	0	0	0	0
PA14_RS11105 → / ← PA14_RS11110:2,384,233:intergenic (+10/+22)	PA14_RS11105	PA14_27460	tpm	thiopurine S-methyltransferase	0	0	0	0	0	0	-0.24	0	0	0	0	0	0	0	0	0	0	0	0	0	0	0.24	0	0	0	0	0
PA14_RS11105 → / ← PA14_RS11110:2,384,235:intergenic (+12/+20)	PA14_RS11105	PA14_27460	tpm	thiopurine S-methyltransferase	0	0	0	0	0	0	0	0.19	-0.23	0	0	0	0	0	0	0	0	0	0	0	0	0	0	0.23	0	0.19	0
PA14_RS11105 → / ← PA14_RS11110:2,384,240:intergenic (+17/+15)	PA14_RS11105	PA14_27460	tpm	thiopurine S-methyltransferase	0	0	0	0	0	0	0	0	0.25	0	0	0	0	0	0	0	0	0	0	0	0	0	0	0	0	0	0.25
PA14_RS14565 ←:3,187,146:N312K (AAT→AAA)	PA14_RS14565	PA14_35820	tnpS	cointegrate resolution protein S	0	0	-0.06	0	0	0	0	0	0	0	0	0.06	0	0	0	0	0	0	0	0	0	0	0	0	0	0	0
PA14_RS10435 →:2,248,060:L131H (CTC→CAC)	PA14_RS10435	PA14_25740	tmk	thymidylate kinase	0	0	-0.05	0	0	-0.08	0	0	0	0	0	0.05	0	0	0	0	0	0.08	0	0	0	0	0	0	0	0	0
PA14_RS06445 →:1,369,841:A10P (GCG→CCG)	PA14_RS06445	PA14_16090	thrC	threonine synthase	0	0	0	-0.06	0	0	0	0	0	0	0	0	0	0	0	0.06	0	0	0	0	0	0	0	0	0	0	0
PA14_RS29520 → / ← PA14_RS29525:6,461,151:intergenic (+363/+253)	PA14_RS29520	PA14_72510	thrB	homoserine kinase	0	0	0	-0.06	-0.07	0	0.07	0	0	0	0	0	0	0	0	0.06	0.07	0	0	0	0	0	0	0	0.07	0	0
PA14_RS29520 → / ← PA14_RS29525:6,461,156:intergenic (+368/+248)	PA14_RS29520	PA14_72510	thrB	homoserine kinase	0	0	0	0.11	0	0	0	0.11	-0.14	0	0	0	0	0	0	0	0	0	0.11	0	0	0	0	0.14	0	0.11	0
PA14_RS29520 → / ← PA14_RS29525:6,461,157:intergenic (+369/+247)	PA14_RS29520	PA14_72510	thrB	homoserine kinase	0	0	0	0	0	0	-0.02	-0.01	-0.06	0	0	0	0	0	0	0	0	0	0	0	0	0.1	0.08	0.06	0.08	0.07	0
PA14_RS29520 → / ← PA14_RS29525:6,461,166:intergenic (+378/+238)	PA14_RS29520	PA14_72510	thrB	homoserine kinase	0	0	0	0	-0.04	-0.13	0.08	-0.01	-0.1	0	0	0	0	0	0	0	0.13	0.13	0	0.09	0	0	0.11	0.1	0.08	0.1	0
PA14_RS29520 → / ← PA14_RS29525:6,461,169:intergenic (+381/+235)	PA14_RS29520	PA14_72510	thrB	homoserine kinase	0	0	0	0	0	0	0	0	0	0	0	0	0	0	0	0	0	0	0	0	0	0.06	0	0	0.06	0	0
PA14_RS29520 → / ← PA14_RS29525:6,461,286:intergenic (+498/+118)	PA14_RS29520	PA14_72510	thrB	homoserine kinase	0	0	0	0	0	0	0	0	-0.08	0	0	0	0	0	0	0	0	0	0	0	0	0	0	0.08	0	0	0
PA14_RS29520 → / ← PA14_RS29525:6,461,159:intergenic (+371/+245)	PA14_RS29520	PA14_72510	thrB	homoserine kinase	0	-0.07	0	-0.08	0	0	0	0.06	0	0	0.07	0	0	0	0	0.08	0	0	0	0	0	0	0	0	0	0.06	0
PA14_RS29520 → / ← PA14_RS29525:6,461,096:intergenic (+308/+308)	PA14_RS29520	PA14_72510	thrB	homoserine kinase	0	0	-0.05	0	0	0	0	0	0	0	0	0.05	0	0	0	0	0	0	0	0	0	0	0	0	0	0	0
PA14_RS29520 → / ← PA14_RS29525:6,461,185:intergenic (+397/+219)	PA14_RS29520	PA14_72510	thrB	homoserine kinase	0	0	-0.05	0	0	0	0	0	-0.06	0	0	0.05	0	0	0	0	0	0	0	0	0	0	0	0.06	0	0	0
PA14_RS29520 → / ← PA14_RS29525:6,461,165:intergenic (+377/+239)	PA14_RS29520	PA14_72510	thrB	homoserine kinase	0	0	-0.08	0	0	0	0	0	0	0	0	0.08	0	0	0	0	0	0	0	0	0	0	0	0	0	0	0
PA14_RS29520 → / ← PA14_RS29525:6,461,263:intergenic (+475/+141)	PA14_RS29520	PA14_72510	thrB	homoserine kinase	0	0	-0.1	0	0	0	0	0	0	0	0	0.1	0	0	0	0	0	0	0	0	0	0	0	0	0	0	0
PA14_RS29520 → / ← PA14_RS29525:6,461,299:intergenic (+511/+105)	PA14_RS29520	PA14_72510	thrB	homoserine kinase	0	0	-0.14	0	-0.11	0	0.01	-0.1	-0.08	0	0	0.14	0	0	0	0	0.11	0	0	0	0	0.09	0.1	0.08	0.1	0	0
thiC ←:5,854,713:Q110P (CAG→CCG)	thiC	PA14_65740	thiC	thiamine biosynthesis protein ThiC	0	0	0	0	0	0	-0.06	0	0	0	0	0	0	0	0	0	0	0	0	0	0	0.06	0	0	0	0	0
PA14_RS17415 ←:3,811,289:R67R (CGT→CGG)	PA14_RS17415	PA14_42880	stk1	Stk1	0	0	0	0	0.05	0	0	0	0	0	0	0	0	0	0	0	0.15	0	0	0.2	0	0	0	0	0	0	0
PA14_RS01600 → / → PA14_RS01605:353,930:intergenic (+265/‑154)	PA14_RS01600	PA14_03920	spuD	polyamine transport protein	0	0.14	0	0	0	0	0	0	0	0	0	0	0	0.14	0	0	0	0	0	0	0	0	0	0	0	0	0
PA14_RS01600 → / → PA14_RS01605:353,897:intergenic (+232/‑187)	PA14_RS01600	PA14_03920	spuD	polyamine transport protein	0	0	0	0	0	0	0	-0.06	0	0	0	0	0	0	0	0	0	0	0	0	0	0	0.06	0	0	0	0
PA14_RS01600 → / → PA14_RS01605:353,923:intergenic (+258/‑161)	PA14_RS01600	PA14_03920	spuD	polyamine transport protein	0	0	0	0	0	0	0	0	-0.09	0	0	0	0	0	0	0	0	0	0	0	0	0	0	0.09	0	0	0
PA14_RS15410 ←:3,383,017:A109G (GCG→GGG)	PA14_RS15410	PA14_37900	sppR	TonB-dependent receptor, SppR	0	0	0	0	0	0	0	-0.1	0	0	0	0	0	0	0	0	0	0	0	0	0	0	0.1	0	0	0	0
argB → / ← PA14_RS28630:6,267,636:intergenic (+21/+23)	PA14_RS28630	PA14_70290	sphR	Sphingosine-responsive Regulator, SphR	0	-0.07	0	0	0	0	0	0	0	0	0.07	0	0	0	0	0	0	0	0	0	0	0	0	0	0	0	0
argB → / ← PA14_RS28630:6,267,634:intergenic (+19/+25)	PA14_RS28630	PA14_70290	sphR	Sphingosine-responsive Regulator, SphR	0	0	-0.07	0	0	0	-0.11	0	0	0	0	0.07	0	0	0	0	0	0	0	0	0	0.11	0	0	0	0	0
argB → / ← PA14_RS28630:6,267,642:intergenic (+27/+17)	PA14_RS28630	PA14_70290	sphR	Sphingosine-responsive Regulator, SphR	0	0	-0.13	0	-0.13	0	0	0.1	0	0	0	0.13	0	0	0	0	0.13	0	0	0	0	0	0	0	0	0.1	0
PA14_RS29125 →:6,370,492:G182A (GGC→GCC)	PA14_RS29125	PA14_71500	soxA	sarcosine oxidase alpha subunit	0	0	0	-0.1	-0.09	0	0	0	0	0	0	0	0	0	0	0.1	0.09	0	0	0	0	0	0	0	0	0	0
PA14_RS29125 →:6,370,548:E201Q (GAG→CAG)	PA14_RS29125	PA14_71500	soxA	sarcosine oxidase alpha subunit	0	0	0	0	0	0	0	0	0.06	0	0	0	0	0	0	0	0	0	0	0	0	0	0	0	0	0	0.06
PA14_RS29860 ←:6,529,166:L245V (CTG→GTG)	PA14_RS29860	PA14_73350	soj	chromosome partitioning protein Soj	0	0	0	0	0	0	0	-0.09	0	0	0	0	0	0	0	0	0	0	0	0	0	0	0.09	0	0	0	0
PA14_RS29860 ←:6,529,172:L243V (CTG→GTG)	PA14_RS29860	PA14_73350	soj	chromosome partitioning protein Soj	0	0	0	0	0	-0.09	0	0	0	0	0	0	0	0	0	0	0	0.09	0	0	0	0	0	0	0	0	0
PA14_RS29860 ←:6,529,193:S236T (TCC→ACC)	PA14_RS29860	PA14_73350	soj	chromosome partitioning protein Soj	0	0	-0.07	0	0	-0.07	-0.06	0.05	0	0	0	0.07	0	0	0	0	0	0.07	0	0	0	0.06	0	0	0	0.05	0
PA14_RS20600 ← / ← PA14_RS20605:4,508,113:intergenic (‑245/+84)	PA14_RS20600	PA14_50730	shaF	ShaF	0	0	0.06	0	0	0	0	0	0	0	0	0	0	0	0.06	0	0	0	0	0	0	0	0	0	0	0	0
secG ←:5,604,444:E77* (GAA→TAA)	secG	PA14_62810	secG	preprotein translocase subunit SecG	0	-0.07	0.08	0	0	0.07	0	-0.05	0	0	0.07	0	0	0	0.08	0	0	0	0	0	0.07	0	0.05	0	0	0	0
secG ←:5,604,402:A91P (GCA→CCA)	secG	PA14_62810	secG	preprotein translocase subunit SecG	0	0	0	0	-0.08	0	0	0.06	0.05	0	0	0	0	0	0	0	0.08	0	0	0	0	0	0	0	0	0.06	0.05
secG ←:5,604,449:A75D (GCT→GAT)	secG	PA14_62810	secG	preprotein translocase subunit SecG	0	0	0	0	0	0	0	0	0.1	0	0	0	0	0	0	0	0	0	0	0	0	0	0	0	0	0	0.1
sbrR →:2,319,370:K251N (AAG→AAC)	sbrR	PA14_26610	sbrR	SbrR	0	0.09	0	0	0	0	0	0	0.17	0	0	0	0	0.09	0	0	0	0	0	0	0	0	0	0	0	0	0.17
sbrR →::M1M (ATG→TTG) †	sbrR	PA14_26610	sbrR	SbrR	0	0	0	0	0	0	0	0	0	0	0	0	0	0	0	0	0	0	0	0	0	0	0	0	0	0	0
sbrR →:2,318,635:H6Q (CAT→CAA)	sbrR	PA14_26610	sbrR	SbrR	0	0	0	0	-0.05	0	0	0	0	0	0	0	0	0	0	0	0.05	0	0	0	0	0	0	0	0	0	0
sbrR →:2,319,249:L211R (CTG→CGG)	sbrR	PA14_26610	sbrR	SbrR	0	0	0	0.12	-0.12	0.02	0.09	-0.14	0	0	0.11	0	0	0.11	0	0	0.12	0.11	0.12	0	0.13	0	0.14	0	0.09	0	0
sbrR →:2,319,251:R212G (CGT→GGT) ‡	sbrR	PA14_26610	sbrR	SbrR	0	0	0	0	0	0	0	0	-0.08	0	0	0	0	0	0	0	0	0	0	0	0	0	0	0.08	0	0	0
sbrR →:2,319,253:R212R (CGT→CGG) ‡	sbrR	PA14_26610	sbrR	SbrR	0	0	0	0	0	0	0	0	-0.06	0	0	0	0	0	0	0	0	0	0	0	0	0	0	0.06	0	0	0
sbrR →:2,319,310:F231L (TTC→TTA)	sbrR	PA14_26610	sbrR	SbrR	0	0	0	0	0	0	0	0.19	0	0	0	0	0	0	0	0	0	0	0	0	0	0	0	0	0	0.19	0
sbrR →:2,319,319:E234D (GAG→GAT)	sbrR	PA14_26610	sbrR	SbrR	0	0	0	0	-0.06	0	0	0	0	0	0	0	0	0	0	0	0.06	0	0	0	0	0	0	0	0	0	0
sbrR →:2,319,336:L240Q (CTG→CAG)	sbrR	PA14_26610	sbrR	SbrR	0	0	0	0	0	-0.07	0	0	0	0	0	0	0	0	0	0	0	0.07	0	0	0	0	0	0	0	0	0
sbrR →:2,319,342:R242P (CGC→CCC)	sbrR	PA14_26610	sbrR	SbrR	0	0	0	0	0	0.11	0	0	0	0	0	0	0	0	0	0	0	0	0	0	0.11	0	0	0	0	0	0
sbrR →:2,319,251:R212G (CGT→GGT)	sbrR	PA14_26610	sbrR	SbrR	0	0	-0.03	0.01	-0.15	-0.13	0	0.09	0	0	0	0.14	0	0	0.11	0.13	0.15	0.13	0.14	0	0	0	0	0	0	0.09	0
sbrI →:2,318,598:L188V (CTG→GTG)	sbrI	PA14_26600	sbrI	SbrI	0	0	0	0	0.07	0	0.07	0	0	0	0	0	0	0	0	0	0	0	0	0.07	0	0	0	0	0.07	0	0
sbrI →:2,318,608:E191V (GAG→GTG)	sbrI	PA14_26600	sbrI	SbrI	0	0	0	-0.08	0.07	0	0	-0.1	0.08	0	0.08	0.08	0	0.08	0.08	0.08	0	0	0	0.07	0	0	0.1	0	0	0	0.08
PA14_RS02285 ←:498,344:M175L (ATG→TTG)	PA14_RS02285	PA14_05620	sahH	S-adenosyl-L-homocysteine hydrolase	0	0	0	0	-0.05	0	0	0	0	0	0	0	0	0	0	0	0.05	0	0	0	0	0	0	0	0	0	0
ruvB ←:4,599,119:E43V (GAG→GTG)	ruvB	PA14_51780	ruvB	Holliday junction DNA helicase RuvB	0	0	0	0	0	0	0	0	0.06	0	0	0	0	0	0	0	0	0	0	0	0	0	0	0	0	0	0.06
PA14_RS24785 → / → PA14_RS24790:5,408,226:intergenic (+45/‑57)	PA14_RS24785	PA14_60670	rtcA	RNA 3'-terminal-phosphate cyclase	0	0	0.04	-0.1	-0.13	-0.09	0	-0.01	0	0	0	0.09	0	0	0.13	0.1	0.13	0.09	0	0	0	0	0.12	0	0	0.11	0
rpsQ →:763,998:P35P (CCG→CCC)	rpsQ	PA14_08940	rpsQ	30S ribosomal protein S17	0	0.05	0	0	0	0	0	0	0	0	0	0	0	0.05	0	0	0	0	0	0	0	0	0	0	0	0	0
rpsK → / → rpsD:770,742:intergenic (+7/‑10)	rpsK	PA14_09090	rpsK	30S ribosomal protein S11	0	0	0	0	0	0	0	0	-0.06	0	0	0	0	0	0	0	0	0	0	0	0	0	0	0.06	0	0	0
rpsF ← / ← rlmB:5,809,264:intergenic (‑150/+69)	rpsF	PA14_65180	rpsF	30S ribosomal protein S6	0	0	0	0	0	0	0	-0.08	0	0	0	0	0	0	0	0	0	0	0	0	0	0	0.08	0	0	0	0
rpsD →:770,762:Y4F (TAC→TTC)	rpsD	PA14_09100	rpsD	30S ribosomal protein S4	0	0	0	0	0	0	0	-0.06	0	0	0	0	0	0	0	0	0	0	0	0	0	0	0.06	0	0	0	0
rpsC →:763,009:A141P (GCC→CCC)	rpsC	PA14_08910	rpsC	30S ribosomal protein S3	0	0	0	0	0	0	0	0.08	0	0	0	0	0	0	0	0	0	0	0	0	0	0	0	0	0	0.08	0
rpoC →:752,916:P859A (CCG→GCG)	rpoC	PA14_08780	rpoC	DNA-directed RNA polymerase subunit beta'	0	0	0	-0.07	0	0	0	0	0	0	0	0	0	0	0	0.07	0	0	0	0	0	0	0	0	0	0	0
rpoB →:749,632:K1144* (AAG→TAG)	rpoB	PA14_08760	rpoB	DNA-directed RNA polymerase subunit beta	0	0	0	0	0	0	0	-0.08	0	0	0	0	0	0	0	0	0	0	0	0	0	0	0.08	0	0	0	0
ribD →:989,291:K286M (AAG→ATG)	ribD	PA14_11400	ribD	riboflavin-specific deaminase/reductase	0	0	-0.05	0	0	0	0	0	0	0	0	0.05	0	0	0	0	0	0	0	0	0	0	0	0	0	0	0
ribB → / → ribE:991,798:intergenic (+31/‑87)	ribB	PA14_11420	ribB	bifunctional 3,4-dihydroxy-2-butanone 4-phosphate synthase/GTP cyclohydrolase II-like protein	0	0	0	0	-0.07	0	0	0	0	0	0	0	0	0	0	0	0.07	0	0	0	0	0	0	0	0	0	0
PA14_RS17510 →:3,836,981:L538Q (CTG→CAG)	PA14_RS17510	PA14_43100	rhsP2	RhsP2	0	0	0	0	0	0	0	0	0.1	0	0	0	0	0	0	0	0	0	0	0	0	0	0	0	0	0	0.1
PA14_RS20210 →:4,427,752:A298A (GCA→GCC)	PA14_RS20210	PA14_49760	rhlC	rhamnosyltransferase 2	0	0	0	-0.14	0	0	0	0	0	0	0	0	0	0	0	0.14	0	0	0	0	0	0	0	0	0	0	0
recN →:5,622,012:S52T (AGC→ACC)	recN	PA14_63010	recN	DNA repair protein RecN	0	0	0	0	0	0	0	-0.09	0	0	0	0	0	0	0	0	0	0	0	0	0	0	0.09	0	0	0	0
recN →:5,622,022:V55V (GTA→GTT)	recN	PA14_63010	recN	DNA repair protein RecN	0	0	0	0	0	0	0.08	0	0	0	0	0	0	0	0	0	0	0	0	0	0	0	0	0	0.08	0	0
recJ →:1,386,312:E265V (GAG→GTG)	recJ	PA14_16220	recJ	single-stranded-DNA-specific exonuclease RecJ	0	0	0.07	0	0	-0.11	0	-0.14	0	0	0	0	0	0	0.07	0	0	0.11	0	0	0	0	0.14	0	0	0	0
recJ →:1,386,299:R261G (CGC→GGC)	recJ	PA14_16220	recJ	single-stranded-DNA-specific exonuclease RecJ	0	0	0	0	0	0	0	-0.06	0	0	0	0	0	0	0	0	0	0	0	0	0	0	0.06	0	0	0	0
recB ←:4,967,225:F474I (TTC→ATC)	recB	PA14_55670	recB	exodeoxyribonuclease V subunit beta	0	0	0	0	0	0	-0.06	0	0	0	0	0	0	0	0	0	0	0	0	0	0	0.06	0	0	0	0	0
recB ←:4,965,943:L901R (CTG→CGG)	recB	PA14_55670	recB	exodeoxyribonuclease V subunit beta	0	0	-0.08	0	0	0	0	0	0	0	0	0.08	0	0	0	0	0	0	0	0	0	0	0	0	0	0	0
PA14_RS15975 ←:3,503,265:T31T (ACT→ACA)	PA14_RS15975	PA14_39350	rbsB	ribose ABC transporter substrate-binding protein	0	0	0	0	-0.06	0	0	0	0	0	0	0	0	0	0	0	0.06	0	0	0	0	0	0	0	0	0	0
PA14_RS15975 ←:3,503,287:L24Q (CTG→CAG)	PA14_RS15975	PA14_39350	rbsB	ribose ABC transporter substrate-binding protein	0	0	0	0	-0.06	0	0	0	0	0	0	0	0	0	0	0	0.06	0	0	0	0	0	0	0	0	0	0
PA14_RS16200 ← / → PA14_RS16205:3,563,336:intergenic (‑409/‑353)	PA14_RS16200	PA14_39980	qscR	transcriptional regulator	0	0	0	0	0	0	0	0	0.11	0	0	0	0	0	0	0	0	0	0	0	0	0	0	0	0	0	0.11
PA14_RS29750 →:6,507,536:L392V (CTG→GTG) ‡	PA14_RS29750	PA14_73070	pyrQ	dihydroorotase	0	0	0	0	-0.07	0	0	0	0	0	0	0	0	0	0	0	0.07	0	0	0	0	0	0	0	0	0	0
PA14_RS29750 →:6,507,537:L392R (CTG→CGG) ‡	PA14_RS29750	PA14_73070	pyrQ	dihydroorotase	0	0	0	0	-0.17	0	0	0	0	0	0	0	0	0	0	0	0.17	0	0	0	0	0	0	0	0	0	0
PA14_RS29750 →:6,507,591:R410P (CGG→CCG)	PA14_RS29750	PA14_73070	pyrQ	dihydroorotase	0	0	0	0	0.08	0	0	0	0	0	0	0	0	0	0	0	0	0	0	0.08	0	0	0	0	0	0	0
pyrF →:2,339,760:L195H (CTC→CAC)	pyrF	PA14_26890	pyrF	orotidine 5'-phosphate decarboxylase	0	0	0	-0.08	0	0	0	0	0	0	0	0	0	0	0	0.08	0	0	0	0	0	0	0	0	0	0	0
pyrF →:2,339,804:I210F (ATC→TTC)	pyrF	PA14_26890	pyrF	orotidine 5'-phosphate decarboxylase	0	0	0	0	0	0	0	-0.07	0.13	0	0	0	0	0	0	0	0	0	0	0	0	0	0.07	0	0	0	0.13
pyrF →:2,339,805:I210S (ATC→AGC)	pyrF	PA14_26890	pyrF	orotidine 5'-phosphate decarboxylase	0	0	0	0	0	0	0.17	0	0	0	0	0	0	0	0	0	0	0	0	0	0	0	0	0	0.17	0	0
pyrF →:2,339,806:I210M (ATC→ATG)	pyrF	PA14_26890	pyrF	orotidine 5'-phosphate decarboxylase	0	0	0	0	0	0	0	0.18	0	0	0	0	0	0	0	0	0	0	0	0	0	0	0	0	0	0.18	0
PA14_RS02130 ←:458,694:Q245H (CAG→CAC)	PA14_RS02130	PA14_05250	pyrC	dihydroorotase	0	0	0	0	0	-0.06	0	-0.08	0	0	0	0	0	0	0	0	0	0.06	0	0	0	0	0.08	0	0	0	0
PA14_RS02130 ←:459,269:A54P (GCG→CCG)	PA14_RS02130	PA14_05250	pyrC	dihydroorotase	0	0	0	0	0	0	-0.06	0	0	0	0	0	0	0	0	0	0	0	0	0	0	0.06	0	0	0	0	0
PA14_RS24395 ←:5,325,464:M720L (ATG→TTG)	PA14_RS24395	PA14_59800	pvrS	PvrS	0	-0.06	0	0	0	0	0.08	0	0	0	0.06	0	0	0	0	0	0	0	0	0	0	0	0	0	0.08	0	0
pvdN ←:2,993,612:S63T (TCA→ACA)	pvdN	PA14_33720	pvdN	protein PvdN	0	0	0	0	-0.06	0	0	0	0	0	0	0	0	0	0	0	0.06	0	0	0	0	0	0	0	0	0	0
pvdN ←:2,993,719:L27R (CTC→CGC)	pvdN	PA14_33720	pvdN	protein PvdN	0	-0.19	0	0	0	0	0	0	0	0	0.19	0	0	0	0	0	0	0	0	0	0	0	0	0	0	0	0
pvdL →:2,914,269:R724P (CGC→CCC)	pvdL	PA14_33280	pvdL	peptide synthase	0	0	0	0	0	0	-0.07	0	0	0	0	0	0	0	0	0	0	0	0	0	0	0.07	0	0	0	0	0
pvdL →:2,917,856:D1920Y (GAC→TAC)	pvdL	PA14_33280	pvdL	peptide synthase	0	0	0	0	-0.05	0	0	0	0	0	0	0	0	0	0	0	0.05	0	0	0	0	0	0	0	0	0	0
putP ← / ← putA:4,802,972:intergenic (‑300/+12)	putP	PA14_54150	putP	sodium/proline symporter PutP	0	0	0	0	0	0	0	0	-0.06	0	0	0	0	0	0	0	0	0	0	0	0	0	0	0.06	0	0	0
putA ←:4,805,311:R286G (CGC→GGC)	putA	PA14_54170	putA	bifunctional proline dehydrogenase/pyrroline-5-carboxylate dehydrogenase	0	0	0	0	0.16	0	0	0	0	0	0	0	0	0	0	0	0	0	0	0.16	0	0	0	0	0	0	0
purN →:4,618,908:S39T (TCC→ACC)	purN	PA14_52050	purN	phosphoribosylglycinamide formyltransferase	0	0	0	0	0	0	-0.22	0	0	0	0	0	0	0	0	0	0	0	0	0	0	0.22	0	0	0	0	0
purE ← / → adhP:6,379,979:intergenic (‑293/‑55)	purE	PA14_71620	purE	phosphoribosylaminoimidazole carboxylase catalytic subunit	0	0	0.02	-0.1	0	0	-0.15	0.18	-0.15	0	0	0.12	0	0	0.14	0.1	0	0	0	0	0	0.15	0	0.15	0	0.18	0
purE ← / → adhP:6,379,994:intergenic (‑308/‑40)	purE	PA14_71620	purE	phosphoribosylaminoimidazole carboxylase catalytic subunit	0	0	0	0	0	0	-0.12	0	0	0	0	0	0	0	0	0	0	0	0	0	0	0.12	0	0	0	0	0
purE ← / → adhP:6,379,976:intergenic (‑290/‑58)	purE	PA14_71620	purE	phosphoribosylaminoimidazole carboxylase catalytic subunit	0	0	-0.09	0	0	0	0	0	0	0	0	0.09	0	0	0	0	0	0	0	0	0	0	0	0	0	0	0
purE ← / → adhP:6,379,977:intergenic (‑291/‑57)	purE	PA14_71620	purE	phosphoribosylaminoimidazole carboxylase catalytic subunit	0	0	-0.1	0	0	0	0	0.12	-0.17	0	0	0.1	0	0	0	0	0	0	0	0	0	0	0	0.17	0	0.12	0
purE ← / → adhP:6,379,982:intergenic (‑296/‑52)	purE	PA14_71620	purE	phosphoribosylaminoimidazole carboxylase catalytic subunit	0	-0.01	-0.15	0	0	0	-0.04	0.14	-0.14	0	0.13	0.15	0	0.12	0	0	0	0	0	0	0	0.15	0	0.26	0.11	0.14	0.12
purE ← / → adhP:6,379,996:intergenic (‑310/‑38)	purE	PA14_71620	purE	phosphoribosylaminoimidazole carboxylase catalytic subunit	0	-0.14	-0.18	0	0	0	-0.15	0.08	-0.18	0	0.14	0.18	0	0	0	0	0	0	0	0	0	0.15	0.14	0.18	0	0.22	0
purD →:5,721,943:N174K (AAT→AAA)	purD	PA14_64220	purD	phosphoribosylamine--glycine ligase	0	0	0	0	0	-0.11	0	0	0	0	0	0	0	0	0	0	0	0.11	0	0	0	0	0	0	0	0	0
purB →:1,623,517:I50N (ATC→AAC)	purB	PA14_30110	purB	adenylosuccinate lyase	0	0	0	0	0	0	0	-0.12	0	0	0	0	0	0	0	0	0	0	0	0	0	0	0.12	0	0	0	0
purB →:1,623,543:D59H (GAC→CAC)	purB	PA14_30110	purB	adenylosuccinate lyase	0	0	0	0	0	0	0	0	-0.09	0	0	0	0	0	0	0	0	0	0	0	0	0	0	0.09	0	0	0
purB →:1,623,547:R60P (CGC→CCC)	purB	PA14_30110	purB	adenylosuccinate lyase	0	0	0	0.31	0	0	-0.23	-0.2	0	0	0	0	0	0	0	0	0	0	0.31	0	0	0.23	0.2	0	0	0	0
purB →:1,623,549:A61P (GCC→CCC)	purB	PA14_30110	purB	adenylosuccinate lyase	0	0	0	-0.13	0	-0.18	0	0	-0.27	0	0	0	0	0	0	0.13	0	0.18	0	0	0	0	0	0.27	0	0	0
purB →:1,623,544:D59A (GAC→GCC)	purB	PA14_30110	purB	adenylosuccinate lyase	0	-0.21	0	0	0	0	0	0	0	0	0.21	0	0	0	0	0	0	0	0	0	0	0	0	0	0	0	0
phoU ← / ← PA14_RS28840:6,306,093:intergenic (‑59/+37)	PA14_RS28840	PA14_70810	pstB	phosphate transporter ATP-binding protein	0	0	0	0.06	0	0	0	0	0	0	0	0	0	0	0	0	0	0	0.06	0	0	0	0	0	0	0	0
phoU ← / ← PA14_RS28840:6,306,102:intergenic (‑68/+28)	PA14_RS28840	PA14_70810	pstB	phosphate transporter ATP-binding protein	0	0	0	0.05	0	0	0	0	0	0	0	0	0	0	0	0	0	0	0.05	0	0	0	0	0	0	0	0
PA14_RS14485 ←:3,167,452:A97P (GCG→CCG)	PA14_RS14485	PA14_35630	pslJ	hypothetical protein	0	0	0	0	0	0	0	-0.05	0	0	0	0	0	0	0	0	0	0	0	0	0	0	0.05	0	0	0	0
PA14_RS14485 ←:3,167,549:N64K (AAC→AAG)	PA14_RS14485	PA14_35630	pslJ	hypothetical protein	0	0	0	0	0	0	0	0	0.05	0	0	0	0	0	0	0	0	0	0	0	0	0	0	0	0	0	0.05
PA14_RS14490 ←:3,168,237:L204V (CTG→GTG)	PA14_RS14490	PA14_35640	pslI	transferase	0	0	0	0	0	0	0.14	-0.07	0.09	0	0	0	0	0	0	0	0	0	0	0	0	0	0.07	0	0.14	0	0.09
PA14_RS14490 ←:3,168,276:D191H (GAC→CAC)	PA14_RS14490	PA14_35640	pslI	transferase	0	0	0	0	0	0	0	0.08	0	0	0	0	0	0	0	0	0	0	0	0	0	0	0	0	0	0.08	0
prpC → / → acnD:4,784,424:intergenic (+23/‑108)	prpC	PA14_53950	prpC	methylcitrate synthase	0	0	-0.07	-0.06	0	0.05	0	0	0	0	0	0.07	0	0	0	0.06	0	0	0	0	0.05	0	0	0	0	0	0
PA14_RS27235 →:5,959,814:F312Y (TTC→TAC)	PA14_RS27235	PA14_66720	priA	primosome assembly protein PriA	0	0	0	0	0	0	0	0	0.06	0	0	0	0	0	0	0	0	0	0	0	0	0	0	0	0	0	0.06
pqqF ←:3,477,384:M479L (ATG→TTG)	pqqF	PA14_39010	pqqF	pyrroloquinoline quinone biosynthesis protein F	0	0	-0.07	-0.06	0	0	0	0	0	0	0	0.07	0	0	0	0.06	0	0	0	0	0	0	0	0	0	0	0
PA14_RS00375 ←:86,790:G318G (GGC→GGT)	PA14_RS00375	PA14_00875	ppkA	serine/threonine protein kinase PpkA	0	0	0	0.08	0	0	0	0	0	0	0	0	0	0	0	0	0	0	0.08	0	0	0	0	0	0	0	0
PA14_RS28500 → / → PA14_RS28505:6,239,803:intergenic (+12/‑152)	PA14_RS28500	PA14_69925	poxB	pyruvate dehydrogenase (cytochrome)	0	0	-0.06	0	0	0	0	0	0	0	0	0.06	0	0	0	0	0	0	0	0	0	0	0	0	0	0	0
PA14_RS07075 ← / ← PA14_RS07080:1,514,157:intergenic (‑68/+21)	PA14_RS07075	PA14_17610	potD	polyamine ABC transporter	0	0	0	0	0	0.13	0	0	-0.11	0	0	0	0	0	0	0	0	0	0	0	0.13	0	0	0.11	0	0	0
PA14_RS07080 ←:1,514,206:L248H (CTC→CAC)	PA14_RS07080	PA14_17620	potC	polyamine transport protein PotC	0	0	0	0	0	0	0	0	0.07	0	0	0	0	0	0	0	0	0	0	0	0	0	0	0	0	0	0.07
PA14_RS08490 → / ← PA14_RS08495:1,826,578:intergenic (+24/+34)	PA14_RS08490	PA14_21110	plcN	non-hemolytic phospholipase C	0	0	0.09	0	-0.09	0	0.08	0.09	0	0	0	0	0	0	0.09	0	0.09	0	0	0	0	0	0	0	0.08	0.09	0
phzM ← / ← phzG:806,533:intergenic (‑15/+323)	phzM	PA14_09490	phzM	phenazine-specific methyltransferase	0	0	0.15	0	0	0	0	0	0	0	0	0	0	0	0.15	0	0	0	0	0	0	0	0	0	0	0	0
PA14_RS08185 →:1,757,331:D300Y (GAT→TAT)	PA14_RS08185	PA14_20430	phnM	phosphonate metabolism protein	0	0	0	0	0.06	0	0	0	0	0	0	0	0	0	0	0	0	0	0	0.06	0	0	0	0	0	0	0
PA14_RS08185 →:1,757,371:H313L (CAT→CTT)	PA14_RS08185	PA14_20430	phnM	phosphonate metabolism protein	0	0	0	0	0	0	0	0	0.08	0	0	0	0	0	0	0	0	0	0	0	0	0	0	0	0	0	0.08
PA14_RS08185 →:1,757,386:L318R (CTC→CGC) ‡	PA14_RS08185	PA14_20430	phnM	phosphonate metabolism protein	0	0	0	-0.13	0	0	0	0	0	0	0	0	0	0	0	0.13	0	0	0	0	0	0	0	0	0	0	0
PA14_RS08185 →:1,757,387:L318L (CTC→CTG) ‡	PA14_RS08185	PA14_20430	phnM	phosphonate metabolism protein	0	0	0	-0.11	0	0	0	0	0	0	0	0	0	0	0	0.11	0	0	0	0	0	0	0	0	0	0	0
PA14_RS08185 →:1,757,395:E321A (GAG→GCG)	PA14_RS08185	PA14_20430	phnM	phosphonate metabolism protein	0	-0.12	0	0	-0.03	0	0.15	0.13	0.13	0	0.12	0	0	0	0	0	0.12	0	0	0.09	0	0	0	0	0.15	0.13	0.13
phnK →:1,755,460:Q200P (CAG→CCG)	phnK	PA14_20400	phnK	phosphonate C-P lyase system protein PhnK	0	0.07	0	0	0	0	0	0	0	0	0	0	0	0.07	0	0	0	0	0	0	0	0	0	0	0	0	0
phnK →:1,755,469:L203R (CTG→CGG)	phnK	PA14_20400	phnK	phosphonate C-P lyase system protein PhnK	0	-0.08	0	-0.08	0	0	0	0	0	0	0.08	0	0	0	0	0.08	0	0	0	0	0	0	0	0	0	0	0
phnH →:1,752,425:Q57H (CAA→CAC)	phnH	PA14_20370	phnH	carbon-phosphorus lyase complex subunit	0	0	-0.06	0	0	0	0	0	0	0	0	0.06	0	0	0	0	0	0	0	0	0	0	0	0	0	0	0
phnH →:1,752,418:A55G (GCG→GGG)	phnH	PA14_20370	phnH	carbon-phosphorus lyase complex subunit	0	0	-0.08	0	0	-0.06	0	0	0	0	0	0.08	0	0	0	0	0	0.06	0	0	0	0	0	0	0	0	0
phnD → / → phnE:1,750,196:intergenic (+14/‑54)	phnD	PA14_20320	phnD	phosphonate ABC transporter substrate-binding protein	0	0	0	0.06	-0.05	0	0	0	0	0	0	0	0	0	0	0	0.05	0	0.06	0	0	0	0	0	0	0	0
PA14_RS21570 ← / → PA14_RS21575:4,697,993:intergenic (‑81/‑204)	PA14_RS21570	PA14_52980	phhR	transcriptional regulator PhhR	0	0	0	0	0.07	0	0	0	0	0	0	0	0	0	0	0	0	0	0	0.07	0	0	0	0	0	0	0
PA14_RS07670 →:1,653,149:N165T (AAC→ACC)	PA14_RS07670	PA14_19140	pheC	cyclohexadienyl dehydratase	0	0	-0.08	0	0	0	0	0	0	0	0	0.08	0	0	0	0	0	0	0	0	0	0	0	0	0	0	0
PA14_RS25885 →:5,648,631:G16R (GGC→CGC)	PA14_RS25885	PA14_63290	phaJ3	hypothetical protein	0	0.08	0	0	0	0	0	0	0	0	0	0	0	0.08	0	0	0	0	0	0	0	0	0	0	0	0	0
PA14_RS25885 →:5,648,649:A22P (GCA→CCA)	PA14_RS25885	PA14_63290	phaJ3	hypothetical protein	0	0	0	0	0	0	0	0	-0.06	0	0	0	0	0	0	0	0	0	0	0	0	0	0	0.06	0	0	0
pepP ←:6,154,893:D112Y (GAT→TAT)	pepP	PA14_69000	pepP	aminopeptidase	0	0	0	0.09	0	0	0	0	0	0	0	0	0	0	0	0	0	0	0.09	0	0	0	0	0	0	0	0
pepN →:2,105,839:V196G (GTC→GGC) ‡	pepN	PA14_24270	pepN	aminopeptidase	0	0	0	0	0	0.08	0	0	0	0	0	0	0	0	0	0	0	0	0	0	0.08	0	0	0	0	0	0
pepN →:2,105,840:V196V (GTC→GTG) ‡	pepN	PA14_24270	pepN	aminopeptidase	0	0	0	0	0	0.06	0	0	0	0	0	0	0	0	0	0	0	0	0	0	0.06	0	0	0	0	0	0
pepN →:2,105,848:D199A (GAC→GCC)	pepN	PA14_24270	pepN	aminopeptidase	0	0	0	0	0	0.06	0	0	0	0	0	0	0	0	0	0	0	0	0	0	0.06	0	0	0	0	0	0
pepN →:2,105,851:L200H (CTC→CAC)	pepN	PA14_24270	pepN	aminopeptidase	0	0	-0.07	0	0	0	0	-0.06	0	0	0	0.07	0	0	0	0	0	0	0	0	0	0	0.06	0	0	0	0
pdxH ←:4,512,986:E186V (GAG→GTG)	pdxH	PA14_50800	pdxH	pyridoxamine 5'-phosphate oxidase	0	0	0	0	0	0	0	0.06	0	0	0	0	0	0	0	0	0	0	0	0	0	0	0	0	0	0.06	0
pdxB ←:4,135,653:A210G (GCG→GGG)	pdxB	PA14_46470	pdxB	erythronate-4-phosphate dehydrogenase	0	0	0.16	-0.14	0	0	0	0	0	0	0	0	0	0	0.16	0.14	0	0	0	0	0	0	0	0	0	0	0
PA14_RS22835 → / ← PA14_RS22840:4,996,794:intergenic (+86/+18)	PA14_RS22835	PA14_55960	pctC	chemotactic transducer PctC	0	0	0.12	0	0	0	0	0	0	0	0	0	0	0	0.12	0	0	0	0	0	0	0	0	0	0	0	0
PA14_RS22835 → / ← PA14_RS22840:4,996,789:intergenic (+81/+23)	PA14_RS22835	PA14_55960	pctC	chemotactic transducer PctC	0	0.12	0	0	0	0	0	0	0	0	0	0	0	0.12	0	0	0	0	0	0	0	0	0	0	0	0	0
PA14_RS22835 → / ← PA14_RS22840:4,996,757:intergenic (+49/+55)	PA14_RS22835	PA14_55960	pctC	chemotactic transducer PctC	0	0	0	0	0	0	-0.12	0	0	0	0	0	0	0	0	0	0	0	0	0	0	0.12	0	0	0	0	0
PA14_RS22835 → / ← PA14_RS22840:4,996,780:intergenic (+72/+32)	PA14_RS22835	PA14_55960	pctC	chemotactic transducer PctC	0	0	0	0	-0.13	0	0	0	0	0	0	0	0	0	0	0	0.13	0	0	0	0	0	0	0	0	0	0
PA14_RS22835 → / ← PA14_RS22840:4,996,782:intergenic (+74/+30)	PA14_RS22835	PA14_55960	pctC	chemotactic transducer PctC	0	0	0	0.13	0	0	0	0	0	0	0	0	0	0	0	0	0	0	0.13	0	0	0	0	0	0	0	0
PA14_RS22845 → / → PA14_RS22850:5,000,701:intergenic (+110/‑125)	PA14_RS22845	PA14_56000	pctA	chemotactic transducer PctA	0	0	0.08	0	0	0	0	0	0	0	0	0	0	0	0.08	0	0	0	0	0	0	0	0	0	0	0	0
PA14_RS07005 → / → PA14_RS07010:1,498,083:intergenic (+30/‑16)	PA14_RS07005	PA14_17460	pcm	protein-L-isoaspartate O-methyltransferase	0	0	0	0	0	0	0	-0.06	0	0	0	0	0	0	0	0	0	0	0	0	0	0	0.06	0	0	0	0
PA14_RS28475 ←:6,230,426:Q349L (CAG→CTG)	PA14_RS28475	PA14_69870	pchP	phosphorylcholine phosphatase	0	0	0	0	0	0	0	0	0.1	0	0	0	0	0	0	0	0	0	0	0	0	0	0	0	0	0	0.1
PA14_RS03770 →:790,875:H285H (CAC→CAT)	PA14_RS03770	PA14_09280	pchF	pyochelin synthetase	0	0	0	0	0	0	0	0	-0.05	0	0	0	0	0	0	0	0	0	0	0	0	0	0	0.05	0	0	0
PA14_RS03770 →:792,044:A675G (GCG→GGG)	PA14_RS03770	PA14_09280	pchF	pyochelin synthetase	0	0	0	0.06	0	0	0	0	0	0	0	0	0	0	0	0	0	0	0.06	0	0	0	0	0	0	0	0
PA14_RS03770 →:792,094:A692P (GCC→CCC)	PA14_RS03770	PA14_09280	pchF	pyochelin synthetase	0	0	0	0	0	0.07	0	0	0	0	0	0	0	0	0	0	0	0	0	0	0.07	0	0	0	0	0	0
PA14_RS03770 →:795,350:A1777G (GCG→GGG)	PA14_RS03770	PA14_09280	pchF	pyochelin synthetase	0	-0.07	0	0	0	0	-0.11	0	0	0	0.07	0	0	0	0	0	0	0	0	0	0	0.11	0	0	0	0	0
PA14_RS03750 ←:782,153:E201A (GAG→GCG)	PA14_RS03750	PA14_09230	pchC	pyochelin biosynthetic protein PchC	0	0	0	0	0	0.06	-0.05	0	0	0	0	0	0	0	0	0	0	0	0	0	0.06	0.05	0	0	0	0	0
PA14_RS03750 ←:782,186:L190H (CTC→CAC)	PA14_RS03750	PA14_09230	pchC	pyochelin biosynthetic protein PchC	0	0	0	0	0	0	0	-0.06	0	0	0	0	0	0	0	0	0	0	0	0	0	0	0.06	0	0	0	0
PA14_RS03750 ←:782,189:L189H (CTC→CAC)	PA14_RS03750	PA14_09230	pchC	pyochelin biosynthetic protein PchC	0	0	0	0	0	0.1	0	0	0	0	0	0	0	0	0	0	0	0	0	0	0.1	0	0	0	0	0	0
PA14_RS01130 →:249,224:A204G (GCG→GGG)	PA14_RS01130	PA14_02810	pcaT	dicarboxylic acid transporter PcaT	0	0	0	0	-0.11	0	0	0	0	0	0	0	0	0	0	0	0.11	0	0	0	0	0	0	0	0	0	0
PA14_RS01130 →:249,229:I206F (ATC→TTC)	PA14_RS01130	PA14_02810	pcaT	dicarboxylic acid transporter PcaT	0	0	-0.08	0	-0.06	0	0	0	0	0	0	0.08	0	0	0	0	0.06	0	0	0	0	0	0	0	0	0	0
PA14_RS01130 →:249,217:I202F (ATC→TTC)	PA14_RS01130	PA14_02810	pcaT	dicarboxylic acid transporter PcaT	0	0	-0.1	0	0	0	0	0	-0.12	0	0	0.1	0	0	0	0	0	0	0	0	0	0	0	0.12	0	0	0
PA14_RS01130 →:249,215:A201G (GCG→GGG)	PA14_RS01130	PA14_02810	pcaT	dicarboxylic acid transporter PcaT	0	0	-0.12	0	-0.09	-0.04	-0.09	0.09	-0.1	0	0	0.12	0	0	0	0	0.09	0.1	0	0	0.06	0.09	0	0.1	0	0.09	0
PA14_RS01135 →:251,305:H457Q (CAT→CAA)	PA14_RS01135	PA14_02830	pcaB	3-carboxy-cis,cis-muconate cycloisomerase	0	0	0	0	0	0	0	0	-0.07	0	0	0	0	0	0	0	0	0	0	0	0	0	0	0.07	0	0	0
PA14_RS20795 ← / ← PA14_RS20800:4,549,044:intergenic (‑43/+67)	PA14_RS20795	PA14_51170	pauA	pimeloyl-CoA synthetase	0	-0.09	0.09	0	0	0	0	0	0	0	0.09	0	0	0	0.09	0	0	0	0	0	0	0	0	0	0	0	0
PA14_RS20795 ←:4,548,986:S6T (TCG→ACG)	PA14_RS20795	PA14_51170	pauA	pimeloyl-CoA synthetase	0	0	-0.05	0	0	0	0	0	-0.07	0	0	0.05	0	0	0	0	0	0	0	0	0	0	0	0.07	0	0	0
pabB →:3,736,717:P232P (CCG→CCC)	pabB	PA14_41820	pabB	para-aminobenzoate synthase component I	0	0	0	0	0	0	0	-0.06	0	0	0	0	0	0	0	0	0	0	0	0	0	0	0.06	0	0	0	0
PA14_RS09325 → / → PA14_RS09330:1,998,117:intergenic (+77/‑138)	PA14_RS09325	PA14_23030	oprB	glucose/carbohydrate outer membrane porin OprB precursor	0	0	0	0	0	0	-0.07	0	0	0	0	0	0	0	0	0	0	0	0	0	0	0.07	0	0	0	0	0
PA14_RS09325 → / → PA14_RS09330:1,998,147:intergenic (+107/‑108)	PA14_RS09325	PA14_23030	oprB	glucose/carbohydrate outer membrane porin OprB precursor	0	0	0	0	0	0	0	-0.07	0	0	0	0	0	0	0	0	0	0	0	0	0	0	0.07	0	0	0	0
PA14_RS09325 → / → PA14_RS09330:1,998,144:intergenic (+104/‑111)	PA14_RS09325	PA14_23030	oprB	glucose/carbohydrate outer membrane porin OprB precursor	0	-0.05	0	0	0	0	0	0	0	0	0.05	0	0	0	0	0	0	0	0	0	0	0	0	0	0	0	0
opmD ←:816,101:V70G (GTC→GGC)	opmD	PA14_09500	opmD	outer membrane protein	0	0	0.07	0	0	0	0	-0.12	0	0	0	0	0	0	0.07	0	0	0	0	0	0	0	0.12	0	0	0	0
opmD ←:815,012:E433V (GAG→GTG)	opmD	PA14_09500	opmD	outer membrane protein	0	0	0	0	0	0	0	-0.14	0	0	0	0	0	0	0	0	0	0	0	0	0	0	0.14	0	0	0	0
opmD ←:816,093:A73P (GCG→CCG)	opmD	PA14_09500	opmD	outer membrane protein	0	0	0	0	0	0	-0.07	-0.11	0.07	0	0	0	0	0	0	0	0	0	0	0	0	0.07	0.11	0	0	0	0.07
opmD ←:816,094:Q72H (CAG→CAC)	opmD	PA14_09500	opmD	outer membrane protein	0	0	0	0	-0.17	0	0	0	0	0	0	0	0	0	0	0	0.17	0	0	0	0	0	0	0	0	0	0
opmD ←:816,095:Q72P (CAG→CCG)	opmD	PA14_09500	opmD	outer membrane protein	0	0	0	0	0	0	0	0	0.1	0	0	0	0	0	0	0	0	0	0	0	0	0	0	0	0	0	0.1
opmD ←:816,108:R68G (CGC→GGC)	opmD	PA14_09500	opmD	outer membrane protein	0	0	-0.17	0	0.16	0	-0.14	0	0.13	0	0	0.17	0	0	0	0	0	0	0	0.16	0	0.14	0	0	0	0	0.13
nuoL ←:2,587,437:Y539F (TAC→TTC)	nuoL	PA14_29880	nuoL	NADH dehydrogenase subunit L	0	0	0	0.1	0	0	0.07	0	0	0	0	0	0	0	0	0	0	0	0.1	0	0	0	0	0	0.07	0	0
nuoL ←:2,587,447:T536S (ACC→TCC)	nuoL	PA14_29880	nuoL	NADH dehydrogenase subunit L	0	0	0	0.09	0	0	0	0	0	0	0	0	0	0	0	0	0	0	0.09	0	0	0	0	0	0	0	0
nuoG ←:2,592,423:I588F (ATC→TTC)	nuoG	PA14_29940	nuoG	NADH dehydrogenase subunit G	0	0	0	0	0	-0.11	0	0	0	0	0	0	0	0	0	0	0	0.11	0	0	0	0	0	0	0	0	0
PA14_RS12230 ←:2,598,051:N218T (AAC→ACC)	PA14_RS12230	PA14_30010	nuoB	NADH dehydrogenase subunit B	0	-0.06	0.05	0	0	0	0	0	0	0	0.06	0	0	0	0.05	0	0	0	0	0	0	0	0	0	0	0	0
nuoC ← / ← PA14_RS12230:2,598,002:intergenic (‑57/+24)	PA14_RS12230	PA14_30010	nuoB	NADH dehydrogenase subunit B	0	0	0	0	-0.07	0	0	0	0	0	0	0	0	0	0	0	0.07	0	0	0	0	0	0	0	0	0	0
PA14_RS12230 ←:2,598,032:E224D (GAA→GAT)	PA14_RS12230	PA14_30010	nuoB	NADH dehydrogenase subunit B	0	0	0	-0.08	0	0	0	0	0	0	0	0	0	0	0	0.08	0	0	0	0	0	0	0	0	0	0	0
nuoC ← / ← PA14_RS12230:2,598,017:intergenic (‑72/+9)	PA14_RS12230	PA14_30010	nuoB	NADH dehydrogenase subunit B	0	0	-0.13	-0.09	0	0	-0.17	0	0	0	0	0.13	0	0	0	0.09	0	0	0	0	0	0.17	0	0	0	0	0
nqrD →:2,215,686:D172V (GAT→GTT)	nqrD	PA14_25330	nqrD	Na(+)-translocating NADH-quinone reductase subunit D	0	0	0	0	0	0	0.06	0	0	0	0	0	0	0	0	0	0	0	0	0	0	0	0	0	0.06	0	0
PA14_RS16665 →:3,668,804:L582H (CTC→CAC)	PA14_RS16665	PA14_41130	nppA2	ABC transporter substrate-binding protein NppA2	0	-0.07	0	0	0	0	0	0	0	0	0.07	0	0	0	0	0	0	0	0	0	0	0	0	0	0	0	0
PA14_RS08100 ← / ← PA14_RS08105:1,744,652:intergenic (‑197/+32)	PA14_RS08100	PA14_20230	nosR	regulatory protein NosR	0	0	-0.07	0	0	0	0	0	0	0	0	0.07	0	0	0	0	0	0	0	0	0	0	0	0	0	0	0
PA14_RS16845 →:3,707,468:V474V (GTC→GTG)	PA14_RS16845	PA14_41530	nirB	assimilatory nitrite reductase large subunit	0	0	0	0	0	-0.35	-0.23	0	0	0	0	0	0	0	0	0	0	0.35	0	0	0	0.23	0	0	0	0	0
PA14_RS05530 ←:1,180,248:L132R (CTG→CGG)	PA14_RS05530	PA14_13740	narX	two-component sensor NarX	0	-0.14	0	0	0	0	0	0	-0.11	0	0.14	0	0	0	0	0	0	0	0	0	0	0	0	0.11	0	0	0
PA14_RS05540 →:1,182,142:N6K (AAT→AAA)	PA14_RS05540	PA14_13770	narK2	nitrite extrusion protein 2	0	0	0	0	0	-0.05	0	0	0	0	0	0	0	0	0	0	0	0.05	0	0	0	0	0	0	0	0	0
napF →:4,372,455:T17T (ACG→ACC)	napF	PA14_49220	napF	ferredoxin protein NapF	0	0	0.06	0	0	0	0	0	0	0	0	0	0	0	0.06	0	0	0	0	0	0	0.06	0	0	0.06	0	0
PA14_RS20010 → / ← PA14_RS20015:4,376,825:intergenic (+13/+19)	PA14_RS20010	PA14_49270	napc	cytochrome c-type protein NapC	0	0	-0.31	0	0	0	0	0	0	0	0	0.31	0	0	0	0	0	0	0	0	0	0	0	0	0	0	0
nagZ →:2,203,023:G145G (GGT→GGG)	nagZ	PA14_25195	nagZ	beta-hexosaminidase	0	0	0.06	0	0	0	0	0	0	0	0	0	0	0	0.06	0	0	0	0	0	0	0	0	0	0	0	0
nagZ →:2,202,855:N89K (AAT→AAA)	nagZ	PA14_25195	nagZ	beta-hexosaminidase	0	0	0	0	0	0	0.06	0	0	0	0	0	0	0	0	0	0	0	0	0	0	0	0	0	0.06	0	0
nagZ →:2,203,020:A144A (GCC→GCG)	nagZ	PA14_25195	nagZ	beta-hexosaminidase	0	0	0	0	0	0.07	0	-0.07	0.07	0	0	0	0	0	0	0	0	0	0	0	0.07	0	0.07	0	0	0	0.07
nagZ →:2,203,045:A153P (GCC→CCC)	nagZ	PA14_25195	nagZ	beta-hexosaminidase	0	0	0	0	0	0	0	0.09	0	0	0	0	0	0	0	0	0	0	0	0	0	0	0	0	0	0.09	0
PA14_RS20875 →:4,563,757:Q307H (CAA→CAC)	PA14_RS20875	PA14_51340	mvfR	transcriptional regulator MvfR	0	0.07	0	0	0	0	0	0	0	0	0	0	0	0.07	0	0	0	0	0	0	0	0	0	0	0	0	0
PA14_RS20875 →:4,563,685:R283R (CGC→CGA)	PA14_RS20875	PA14_51340	mvfR	transcriptional regulator MvfR	0	0	0	-0.09	0	0	0	0	0	0	0	0	0	0	0	0.09	0	0	0	0	0	0	0	0	0	0	0
PA14_RS20875 →:4,563,752:W306G (TGG→GGG)	PA14_RS20875	PA14_51340	mvfR	transcriptional regulator MvfR	0	0	0	0	0	-0.08	0	0	0	0	0	0	0	0	0	0	0	0.08	0	0	0	0	0	0	0	0	0
PA14_RS20875 →:4,563,766:I310M (ATC→ATG)	PA14_RS20875	PA14_51340	mvfR	transcriptional regulator MvfR	0	0	0	0.09	0	0	0	0	0	0	0	0	0	0	0	0	0	0	0.09	0	0	0	0	0	0	0	0
mutM →:415,656:L122Q (CTG→CAG)	mutM	PA14_04670	mutM	formamidopyrimidine-DNA glycosylase	0	0	0	0	0	0	0.18	0.2	0	0	0	0	0	0	0	0	0	0	0	0	0	0	0	0	0.18	0.2	0
mutM →:415,668:L126Q (CTG→CAG)	mutM	PA14_04670	mutM	formamidopyrimidine-DNA glycosylase	0	0	0	0	0	0	0	0.06	0	0	0	0	0	0	0	0	0	0	0	0	0	0	0	0	0	0.06	0
mutM →:415,708:F139L (TTC→TTA)	mutM	PA14_04670	mutM	formamidopyrimidine-DNA glycosylase	0	0	0	-0.09	0	0	0	0	0	0	0	0	0	0	0	0.09	0	0	0	0	0	0	0	0	0	0	0
PA14_RS25195 ←:5,502,563:M98L (ATG→TTG)	PA14_RS25195	PA14_61660	murI	glutamate racemase	0	0	0	0	0	0	-0.05	0	-0.06	0	0	0	0	0	0	0	0	0	0	0	0	0.05	0	0.06	0	0	0
PA14_RS23395 ←:5,114,442:L89V (CTG→GTG)	PA14_RS23395	PA14_57390	murF	UDP-N-acetylmuramoylalanyl-D-glutamyl-2,6- diaminopimelate--D-alanyl-D-alanine ligase	0	-0.06	0	0	0	0	0	0	0	0	0.06	0	0	0	0	0	0	0	0	0	0	0	0	0	0	0	0
murA ←:5,148,305:K253* (AAG→TAG)	murA	PA14_57810	murA	UDP-N-acetylglucosamine 1-carboxyvinyltransferase	0	0	0	0	0	0	0	-0.1	0	0	0	0	0	0	0	0	0	0	0	0	0	0	0.1	0	0	0	0
PA14_RS20785 ←:4,545,281:A214A (GCT→GCG)	PA14_RS20785	PA14_51150	mucK	cis,cis-muconate transporter MucK	0	0	0	0	0	0.08	0	0	0	0	0	0	0	0	0	0	0	0	0	0	0.08	0	0	0	0	0	0
PA14_RS22140 ←:4,825,426:L8V (CTT→GTT)	PA14_RS22140	PA14_54410	mucB	negative regulator for alginate biosynthesis MucB	0	0	0	0	0	0	-0.07	0	0	0	0	0	0	0	0	0	0	0	0	0	0	0.07	0	0	0	0	0
PA14_RS22140 ←:4,825,420:L10V (CTT→GTT)	PA14_RS22140	PA14_54410	mucB	negative regulator for alginate biosynthesis MucB	0	0.07	-0.07	0.06	0	0	0	0.06	0.07	0	0	0.07	0	0.07	0	0	0	0	0.06	0	0	0	0	0	0	0.06	0.07
PA14_RS22140 ←:4,825,400:V16V (GTT→GTA)	PA14_RS22140	PA14_54410	mucB	negative regulator for alginate biosynthesis MucB	0	0	-0.1	0	0	0	0	0	0	0	0	0.1	0	0	0	0	0	0	0	0	0	0	0	0	0	0	0
PA14_RS14000 ←:3,054,314:L274Q (CTA→CAA)	PA14_RS14000	PA14_34340	mtlZ	fructokinase	0	0	0	0	-0.09	0	0	0	0	0	0	0	0	0	0	0	0.09	0	0	0	0	0	0	0	0	0	0
PA14_RS14000 ←:3,054,351:Y262N (TAC→AAC)	PA14_RS14000	PA14_34340	mtlZ	fructokinase	0	0	0	0	0	0	-0.06	-0.05	0	0	0	0	0	0	0	0	0	0	0	0	0	0.06	0.05	0	0	0	0
PA14_RS14010 ←:3,057,684:N158T (AAC→ACC)	PA14_RS14010	PA14_34360	mtlD	mannitol dehydrogenase	0	0	0	0	0	0	0.07	0	0	0	0	0	0	0	0	0	0	0	0	0	0	0	0	0	0.07	0	0
PA14_RS23720 ←:5,176,631:A131G (GCC→GGC)	PA14_RS23720	PA14_58150	mreB	rod shape-determining protein MreB	0	0.12	0.15	0	0	0	0	0	0	0	0	0	0	0.12	0.15	0	0	0	0	0	0	0	0	0	0	0	0
PA14_RS23720 ←:5,176,583:I147N (ATC→AAC)	PA14_RS23720	PA14_58150	mreB	rod shape-determining protein MreB	0	0	0	0	0	0	0	0	-0.15	0	0	0	0	0	0	0	0	0	0	0	0	0	0	0.15	0	0	0
PA14_RS23720 ←:5,176,596:M143L (ATG→CTG)	PA14_RS23720	PA14_58150	mreB	rod shape-determining protein MreB	0	0	0	0	0	0	0	0	-0.1	0	0	0	0	0	0	0	0	0	0	0	0	0	0	0.1	0	0	0
PA14_RS23720 ←:5,176,619:E135A (GAG→GCG)	PA14_RS23720	PA14_58150	mreB	rod shape-determining protein MreB	0	0	-0.24	0	0	0	0	0	0	0	0	0.24	0	0	0	0	0	0	0	0	0	0	0	0	0	0	0
PA14_RS07785 ←:1,682,897:K468* (AAG→TAG)	PA14_RS07785	PA14_19470	mqoA	malate:quinone oxidoreductase	0	0	-0.07	0	0	0	0	0	0	0	0	0.07	0	0	0	0	0	0	0	0	0	0	0	0	0	0	0
PA14_RS10595 ←:2,281,014:R336R (CGT→CGA)	PA14_RS10595	PA14_26130	morB	morphinone reductase	0	0	0	0	0	0.09	0	0	0	0	0	0	0	0	0	0	0	0	0	0	0.09	0	0	0	0	0	0
PA14_RS24870 →:5,429,174:Q113L (CAG→CTG)	PA14_RS24870	PA14_60870	morA	motility regulator	0	0	0.12	0	0	0	0	-0.12	0.14	0	0	0	0	0	0.12	0	0	0	0	0	0	0	0.12	0	0	0	0.14
PA14_RS24870 → / → PA14_RS24875:5,433,126:intergenic (+42/‑81)	PA14_RS24870	PA14_60870	morA	motility regulator	0	0	0	0	0	0	-0.06	0	0	0	0	0	0	0	0	0	0	0	0	0	0	0.06	0	0	0	0	0
mnmC ←:1,678,480:A87P (GCG→CCG)	mnmC	PA14_19400	mnmC	5-methylaminomethyl-2-thiouridine methyltransferase	0	0	0	0	0	0.08	0.08	-0.09	0	0	0	0	0	0	0	0	0	0	0	0	0.08	0	0.09	0	0.08	0	0
mnmC ←:1,678,487:P84P (CCG→CCC)	mnmC	PA14_19400	mnmC	5-methylaminomethyl-2-thiouridine methyltransferase	0	0	0	0	0.11	0	0	0	0	0	0	0	0	0	0	0	0	0	0	0.11	0	0	0	0	0	0	0
mmsB →:4,846,919:G46A (GGC→GCC)	mmsB	PA14_18140	mmsB	3-hydroxyisobutyrate dehydrogenase	0	0	0	-0.05	0	0	0	0	0	0	0	0	0	0	0	0.05	0	0	0	0	0	0	0	0	0	0	0
miaA ←:5,820,874:R80P (CGC→CCC)	miaA	PA14_65320	miaA	tRNA delta(2)-isopentenylpyrophosphate transferase	0	0	0	-0.08	0	0	0	0	0	0	0	0	0	0	0	0.08	0	0	0	0	0	0	0	0	0	0	0
mexR ←:486,078:A141A (GCG→GCC)	mexR	PA14_05520	mexR	multidrug resistance operon repressor MexR	0	0	0	0	0	0	0.05	0	0	0	0	0	0	0	0	0	0	0	0	0	0	0	0	0	0.05	0	0
mexH ←:820,066:A152G (GCG→GGG)	mexH	PA14_09530	mexH	RND efflux membrane fusion protein	0	0.02	0	-0.1	-0.08	0	0	0.1	0.07	0	0.07	0	0	0.09	0	0.1	0.08	0	0	0	0	0	0	0	0	0.1	0.07
mexH ←:820,027:I165N (ATC→AAC)	mexH	PA14_09530	mexH	RND efflux membrane fusion protein	0	0	0	0	0	0	-0.07	0	0	0	0	0	0	0	0	0	0	0	0	0	0	0.07	0	0	0	0	0
mexC ←:5,426,912:M320L (ATG→TTG)	mexC	PA14_60850	mexC	multidrug efflux RND membrane fusion protein	0	0	0.08	0	-0.06	0	0.1	0	0.07	0	0	0	0	0	0.08	0	0.06	0	0	0	0	0	0	0	0.1	0	0.07
mexC ←:5,426,917:Q318L (CAG→CTG)	mexC	PA14_60850	mexC	multidrug efflux RND membrane fusion protein	0	0	0	0	0	0	0	0	-0.1	0	0	0	0	0	0	0	0	0	0	0	0	0	0	0.1	0	0	0
PA14_RS29560 →:6,468,752:V69D (GTC→GAC)	PA14_RS29560	PA14_72620	metN	DL-methionine transporter ATP-binding subunit	0	0	0	0.14	0	0	0	0	0	0	0	0	0	0	0	0	0	0	0.14	0	0	0	0	0	0	0	0
PA14_RS06185 → / → PA14_RS06190:1,311,704:intergenic (+100/‑370)	PA14_RS06185	PA14_15480	merR	transcriptional regulator MerR	0	0	0	0	-0.12	0	0	0	0	0	0	0	0	0	0	0	0.12	0	0	0	0	0	0	0	0	0	0
PA14_RS06185 → / → PA14_RS06190:1,311,709:intergenic (+105/‑365)	PA14_RS06185	PA14_15480	merR	transcriptional regulator MerR	0	0	0	0	0	0	0	-0.12	0	0	0	0	0	0	0	0	0	0	0	0	0	0	0.12	0	0	0	0
PA14_RS26475 ←:5,771,165:L194V (CTG→GTG)	PA14_RS26475	PA14_64770	mdlC	benzoylformate decarboxylase	0	-0.06	0	0	0	0	0	0	-0.06	0	0.06	0	0	0	0	0	0	0	0	0	0	0	0	0.06	0	0	0
PA14_RS25015 →:5,467,483:A45A (GCC→GCG)	PA14_RS25015	PA14_61250	lysP	APC family lysine-specific permease	0	0	0.13	0	0	0	0	0	0	0	0	0	0	0	0.13	0	0	0	0	0	0	0	0	0	0	0	0
PA14_RS21415 ←:4,660,886:I372I (ATC→ATA)	PA14_RS21415	PA14_52580	lysC	aspartate kinase	0	0	0	-0.05	0	0	0	0	0	0	0	0	0	0	0	0.05	0	0	0	0	0	0	0	0	0	0	0
PA14_RS21415 ←:4,660,887:I372N (ATC→AAC)	PA14_RS21415	PA14_52580	lysC	aspartate kinase	0	0	0	0	0	0	0	0	-0.05	0	0	0	0	0	0	0	0	0	0	0	0	0	0	0.05	0	0	0
lpxD →:1,474,365:F287L (TTC→TTA)	lpxD	PA14_17180	lpxD	UDP-3-O-[3-hydroxymyristoyl] glucosamine N-acyltransferase	0	0	0	0	0	0	0.06	0	0	0	0	0	0	0	0	0	0	0	0	0	0	0	0	0	0.06	0	0
PA14_RS25790 →:5,628,142:E276D (GAA→GAC)	PA14_RS25790	PA14_63080	lldP	L-lactate permease	0	0	0	0	0	0.11	0	0	0	0	0	0	0	0	0	0	0	0	0	0	0.11	0	0	0	0	0	0
PA14_RS25790 →:5,628,157:S281R (AGC→AGG)	PA14_RS25790	PA14_63080	lldP	L-lactate permease	0	0	0	0	0	0	0	0.15	0	0	0	0	0	0	0	0	0	0	0	0	0	0	0	0	0	0.15	0
PA14_RS10945 ←:2,353,181:V312G (GTC→GGC)	PA14_RS10945	PA14_27090	lipH	lipase chaperone	0	-0.1	-0.01	0	0	-0.11	0.13	0	0	0	0.1	0.11	0	0	0.1	0	0	0.11	0	0	0	0	0	0	0.13	0	0
PA14_RS10945 ←:2,353,190:R309P (CGC→CCC)	PA14_RS10945	PA14_27090	lipH	lipase chaperone	0	0	-0.11	0	0	0	0	0	0	0	0	0.11	0	0	0	0	0	0	0	0	0	0	0	0	0	0	0
PA14_RS10945 ←:2,353,178:E313A (GAA→GCA)	PA14_RS10945	PA14_27090	lipH	lipase chaperone	0	-0.09	-0.13	0	-0.1	-0.1	0.14	0	-0.11	0	0.09	0.13	0	0	0	0	0.1	0.1	0	0	0	0	0	0.11	0.14	0	0
lexA ←:2,201,424:I11F (ATC→TTC)	lexA	PA14_25160	lexA	LexA repressor	0	-0.1	0	0	0	0	0	0	0	0	0.1	0	0	0	0	0	0	0	0	0	0	0	0	0	0	0	0
leuC →:2,064,987:L472F (TTG→TTT)	leuC	PA14_23750	leuC	isopropylmalate isomerase large subunit	0	0.09	0	0	0	0	0	0	0	0	0	0	0	0.09	0	0	0	0	0	0	0	0	0	0	0	0	0
leuC →:2,064,332:F254Y (TTC→TAC)	leuC	PA14_23750	leuC	isopropylmalate isomerase large subunit	0	0	0	0	0	0	-0.09	0	0	0	0	0	0	0	0	0	0	0	0	0	0	0.09	0	0	0	0	0
leuA ←:1,274,028:N506T (AAT→ACT)	leuA	PA14_15030	leuA	2-isopropylmalate synthase	0	0	0	-0.1	0	0	0	0	0	0	0	0	0	0	0	0.1	0	0	0	0	0	0	0	0	0	0	0
PA14_RS07955 → / → pdhA:1,714,603:intergenic (+78/‑64)	PA14_RS07955	PA14_19870	ldh	leucine dehydrogenase	0	0	0.06	0	0	0	0	0	0	0	0	0	0	0	0.06	0	0	0	0	0	0	0	0	0	0	0	0
lasA ←:3,600,369:G35C (GGC→TGC)	lasA	PA14_40290	lasA	LasA protease	0	0	0	0	0	0	0	-0.06	0	0	0	0	0	0	0	0	0	0	0	0	0	0	0.06	0	0	0	0
PA14_RS01935 ←:422,081:I505N (ATC→AAC)	PA14_RS01935	PA14_04780	laoA	LaoA	0	0	0	0	0	0	0	0	-0.05	0	0	0	0	0	0	0	0	0	0	0	0	0	0	0.05	0	0	0
PA14_RS01935 ←:422,117:L493Q (CTG→CAG)	PA14_RS01935	PA14_04780	laoA	LaoA	0	0	0	0	0	0	-0.08	0	0	0	0	0	0	0	0	0	0	0	0	0	0	0.08	0	0	0	0	0
PA14_RS01935 ←:422,027:A523G (GCG→GGG)	PA14_RS01935	PA14_04780	laoA	LaoA	0	-0.12	0	0	0	0.15	0	0	0	0	0.12	0	0	0	0	0	0	0	0	0	0.15	0	0	0	0	0	0
PA14_RS17615 ← / ← kdpC:3,863,021:intergenic (‑58/+50)	PA14_RS17615	PA14_43350	kdpD	two-component sensor KdpD	0	0	0.09	-0.09	0	0	0	0	0	0	0	0	0	0	0.09	0.09	0	0	0	0	0	0	0	0	0	0	0
PA14_RS17615 ← / ← kdpC:3,863,018:intergenic (‑55/+53)	PA14_RS17615	PA14_43350	kdpD	two-component sensor KdpD	0	-0.22	0.05	0	0.26	-0.17	0.18	0	-0.2	0	0.22	0.21	0	0	0.26	0	0	0.17	0	0.26	0	0	0	0.2	0.18	0	0
PA14_RS17615 ←:3,861,531:L478H (CTC→CAC)	PA14_RS17615	PA14_43350	kdpD	two-component sensor KdpD	0	0	0	0	0	0	0.09	0	0	0	0	0	0	0	0	0	0	0	0	0	0	0	0	0	0.09	0	0
PA14_RS17615 ←:3,862,059:L302Q (CTG→CAG)	PA14_RS17615	PA14_43350	kdpD	two-component sensor KdpD	0	0	0	0	0	0	0	-0.1	0	0	0	0	0	0	0	0	0	0	0	0	0	0	0.1	0	0	0	0
kdpC ←:3,863,072:*184L (TAG→TTG)	kdpC	PA14_43370	kdpC	potassium-transporting ATPase subunit C	0	0	0	-0.06	0	0	0	0	0	0	0	0	0	0	0	0.06	0	0	0	0	0	0	0	0	0	0	0
PA14_RS24700 → / → PA14_RS24705:5,390,356:intergenic (+58/‑80)	PA14_RS24700	PA14_60470	ispB	octaprenyl-diphosphate synthase	0	0	0	0	0	0	0.06	0	0	0	0	0	0	0	0	0	0	0	0	0	0	0	0	0	0.06	0	0
PA14_RS24700 → / → PA14_RS24705:5,390,378:intergenic (+80/‑58)	PA14_RS24700	PA14_60470	ispB	octaprenyl-diphosphate synthase	0	0	0	0	0	0	0	0.05	0	0	0	0	0	0	0	0	0	0	0	0	0	0	0	0	0	0.05	0
infB ←:5,599,731:M716I (ATG→ATT)	infB	PA14_62760	infB	translation initiation factor IF-2	0	0	0	0	0.05	0	0	0	0	0	0	0	0	0	0	0	0	0	0	0.05	0	0	0	0	0	0	0
hrpA → / ← phoA:1,856,247:intergenic (+47/+26)	hrpA	PA14_21400	hrpA	ATP-dependent helicase	0	0	0	0	0	0	0	0	-0.07	0	0	0	0	0	0	0	0	0	0	0	0	0	0	0.07	0	0	0
PA14_RS06440 → / → PA14_RS06445:1,369,810:intergenic (+49/‑4)	PA14_RS06440	PA14_16070	hom	homoserine dehydrogenase	0	0	0	0	0	-0.13	0	0	0	0	0	0	0	0	0	0	0	0.13	0	0	0	0	0	0	0	0	0
PA14_RS05780 ←:1,235,278:W29G (TGG→GGG)	PA14_RS05780	PA14_14460	holC	DNA polymerase III subunit chi	0	0.1	0	0	0	0	0	0	0	0	0	0	0	0.1	0	0	0	0	0	0	0	0	0	0	0	0	0
PA14_RS05780 ←:1,235,292:L24R (CTG→CGG)	PA14_RS05780	PA14_14460	holC	DNA polymerase III subunit chi	0	0	-0.12	-0.11	0	0	-0.12	0.09	0	0	0	0.12	0	0	0	0.11	0	0	0	0	0	0.12	0	0	0	0.09	0
PA14_RS04945 ←:1,054,660:L8H (CTC→CAC)	PA14_RS04945	PA14_12200	holA	DNA polymerase III subunit delta	0	0	0	0	0	0	-0.05	0	0	0	0	0	0	0	0	0	0	0	0	0	0	0.05	0	0	0	0	0
PA14_RS25335 → / ← PA14_RS25340:5,532,203:intergenic (+8/+73)	PA14_RS25335	PA14_62010	hitB	iron ABC transporter, permease	0	0	0.1	0	0	0	0	0	0	0	0	0	0	0	0.1	0	0	0	0	0	0	0	0	0	0	0	0
PA14_RS25335 → / ← PA14_RS25340:5,532,257:intergenic (+62/+19)	PA14_RS25335	PA14_62010	hitB	iron ABC transporter, permease	0	0	0	0	0	0	0	-0.21	0	0	0	0	0	0	0	0	0	0	0	0	0	0	0.21	0	0	0	0
hisS →:1,264,789:L220V (CTG→GTG)	hisS	PA14_14890	hisS	histidyl-tRNA synthetase	0	0	0	0.17	0	0	0	-0.1	0	0	0	0	0	0	0	0	0	0	0.17	0	0	0	0.1	0	0	0	0
hisS →:1,264,794:V221V (GTC→GTG)	hisS	PA14_14890	hisS	histidyl-tRNA synthetase	0	0	0	0	0	0	0	0	0.13	0	0	0	0	0	0	0	0	0	0	0	0	0	0	0	0	0	0.13
hisS →:1,264,800:A223A (GCG→GCC)	hisS	PA14_14890	hisS	histidyl-tRNA synthetase	0	0	-0.09	0	0	0	0	0	-0.08	0	0	0.09	0	0	0	0	0	0	0	0	0	0	0	0.08	0	0	0
PA14_RS10645 ←:2,290,314:R135L (CGC→CTC)	PA14_RS10645	PA14_26240	hisJ	periplasmic histidine-binding protein HisJ	0	0	0	0	0.05	0	0	0	0	0	0	0	0	0	0	0	0	0	0	0.05	0	0	0	0	0	0	0
hisB ←:6,063,843:M1M (ATG→TTG) †	hisB	PA14_67930	hisB	imidazoleglycerol-phosphate dehydratase	0	0	0	0	0	0	0	-0.09	0	0	0	0	0	0	0	0	0	0	0	0	0	0	0.09	0	0	0	0
hflX ←:5,818,696:E360A (GAG→GCG)	hflX	PA14_65300	hflX	GTP-binding protein	0	0.11	0	0	0	0.09	0	0	-0.1	0	0	0	0	0.11	0	0	0	0	0	0	0.09	0	0	0.1	0	0	0
hflX ←:5,818,627:Q383P (CAG→CCG)	hflX	PA14_65300	hflX	GTP-binding protein	0	0	0	0	0	0	0	0	-0.05	0	0	0	0	0	0	0	0	0	0	0	0	0	0	0.05	0	0	0
hexR ←:6,394,749:A76A (GCC→GCG)	hexR	PA14_23060	hexR	DNA-binding transcriptional regulator HexR	0	0	0	0	0	0	0	0	0.08	0	0	0	0	0	0	0	0	0	0	0	0	0	0	0	0	0	0.08
hexR ←:6,394,757:L74V (CTG→GTG)	hexR	PA14_23060	hexR	DNA-binding transcriptional regulator HexR	0	0	0	0	0	0.12	0	0	0	0	0	0	0	0	0	0	0	0	0	0	0.12	0	0	0	0	0	0
PA14_RS28305 ←:6,193,650:S21T (AGC→ACC)	PA14_RS28305	PA14_69440	hemD	uroporphyrinogen-III synthase	0	0	0.27	0.28	-0.26	-0.21	0	0	0	0	0	0	0	0	0.27	0	0.26	0.21	0.28	0	0	0	0	0	0	0	0
PA14_RS28305 ←:6,193,651:S21R (AGC→CGC)	PA14_RS28305	PA14_69440	hemD	uroporphyrinogen-III synthase	0	0	0	-0.14	0	0	0	0	0	0	0	0	0	0	0	0.14	0	0	0	0	0	0	0	0	0	0	0
PA14_RS28305 ←:6,193,651:S21R (AGC→CGC) ‡	PA14_RS28305	PA14_69440	hemD	uroporphyrinogen-III synthase	0	0.01	-0.14	0	0.12	0.09	-0.01	0	0	0.1	0.1	0.14	0.1	0.11	0	0	0	0	0	0.12	0.09	0.12	0.11	0.1	0.11	0.11	0.1
PA14_RS01310 ← / ← PA14_RS01315:289,638:intergenic (‑666/+1161)	PA14_RS01310	PA14_03240	hcpC	secreted protein Hcp	0	0.01	0	0.04	-0.01	-0.04	0.02	0.15	0	0.15	0.15	0.14	0.15	0.16	0.14	0.13	0.17	0.19	0.17	0.16	0.15	0.13	0	0.19	0.15	0.15	0.19
PA14_RS01310 ← / ← PA14_RS01315:289,139:intergenic (‑167/+1660)	PA14_RS01310	PA14_03240	hcpC	secreted protein Hcp	0	0	0	0.08	0	0	0	0	0	0	0	0	0	0	0	0	0	0	0.08	0	0	0	0	0	0	0	0
PA14_RS01310 ← / ← PA14_RS01315:289,152:intergenic (‑180/+1647)	PA14_RS01310	PA14_03240	hcpC	secreted protein Hcp	0	0	0	0	0	0.05	0	0	0	0	0	0	0	0	0	0	0	0	0	0	0.05	0	0	0	0	0	0
guaB →:1,298,678:G329A (GGC→GCC)	guaB	PA14_15310	guaB	inosine 5'-monophosphate dehydrogenase	0	0.06	0	0	0	0	0	0	0	0	0	0	0	0.06	0	0	0	0	0	0	0	0	0	0	0	0	0
guaB →:1,298,432:D247V (GAC→GTC)	guaB	PA14_15310	guaB	inosine 5'-monophosphate dehydrogenase	0	0	0	0	0	0	-0.06	0	0	0	0	0	0	0	0	0	0	0	0	0	0	0.06	0	0	0	0	0
gshA → / ← argA:6,130,353:intergenic (+27/+16)	gshA	PA14_68730	gshA	glutamate--cysteine ligase	0	0	0	0	0	0	0	0	-0.03	0	0	0	0	0	0	0	0	0	0	0	0	0	0	0.08	0	0	0.05
PA14_RS15645 → / ← PA14_RS15650:3,434,449:intergenic (+12/+56)	PA14_RS15645	PA14_38490	gnyL	hydroxymethylglutaryl-CoA lyase	0	0	0	0	0	0	0	0	0.08	0	0	0	0	0	0	0	0	0	0	0	0	0	0	0	0	0	0.08
PA14_RS15645 → / ← PA14_RS15650:3,434,464:intergenic (+27/+41)	PA14_RS15645	PA14_38490	gnyL	hydroxymethylglutaryl-CoA lyase	0	0	0	0	0	0	0.06	0	0	0	0	0	0	0	0	0	0	0	0	0	0	0	0	0	0.06	0	0
PA14_RS14100 → / ← PA14_RS14105:3,079,053:intergenic (+235/+119)	PA14_RS14100	PA14_34660	gntR	transcriptional regulator GntR	0	0	0.18	0	0	0	0	0	0	0	0	0	0	0	0.18	0	0	0	0	0	0	0	0	0	0	0	0
PA14_RS14100 → / ← PA14_RS14105:3,079,038:intergenic (+220/+134)	PA14_RS14100	PA14_34660	gntR	transcriptional regulator GntR	0	0	0	0	-0.1	0	0	0	0	0	0	0	0	0	0	0	0.1	0	0	0	0	0	0	0	0	0	0
PA14_RS14100 → / ← PA14_RS14105:3,078,850:intergenic (+32/+322)	PA14_RS14100	PA14_34660	gntR	transcriptional regulator GntR	0	-0.05	0	0	-0.06	-0.05	0	0	0	0	0.05	0	0	0	0	0	0.06	0.1	0	0	0.05	0	0	0	0	0	0
PA14_RS09540 → / → PA14_RS09545:2,052,933:intergenic (+61/‑141)	PA14_RS09540	PA14_23560	gltX	glutamyl-tRNA synthetase	0	0	0.1	0	0	0	0	0	0	0	0	0	0	0	0.1	0	0	0	0	0	0	0	0	0	0	0	0
PA14_RS09540 → / → PA14_RS09545:2,052,923:intergenic (+51/‑151)	PA14_RS09540	PA14_23560	gltX	glutamyl-tRNA synthetase	0	0	0	0.08	0	0	0	0	0	0	0	0	0	0	0	0	0	0	0.08	0	0	0	0	0	0	0	0
PA14_RS09540 → / → PA14_RS09545:2,052,942:intergenic (+70/‑132)	PA14_RS09540	PA14_23560	gltX	glutamyl-tRNA synthetase	0	0	-0.08	0	0	0	0	0	0	0	0	0.08	0	0	0	0	0	0	0	0	0	0	0	0	0	0	0
glpD ← / ← PA14_RS07210:1,541,786:intergenic (‑218/+61)	PA14_RS07210	PA14_17940	glpR	glycerol-3-phosphate regulon repressor	0	0	0	0	0	0.13	0	-0.08	0	0	0	0	0	0	0	0	0	0	0	0	0.13	0	0.08	0	0	0	0
glpD ← / ← PA14_RS07210:1,541,810:intergenic (‑242/+37)	PA14_RS07210	PA14_17940	glpR	glycerol-3-phosphate regulon repressor	0	0	0	-0.02	0	0	0	0	0	0	0	0	0	0	0	0.16	0	0	0.14	0	0	0	0	0	0	0	0
PA14_RS07210 ← / ← glpK:1,542,714:intergenic (‑112/+94)	PA14_RS07210	PA14_17940	glpR	glycerol-3-phosphate regulon repressor	0	0	0	0	0	0	-0.07	0	0	0	0	0	0	0	0	0	0	0	0	0	0	0.07	0	0	0	0	0
PA14_RS07220 ←:1,544,733:I158F (ATC→TTC)	PA14_RS07220	PA14_17980	glpF	glycerol uptake facilitator protein	0	0	0.17	-0.17	0	0	0	0	0	0	0	0	0	0	0.17	0.17	0	0	0	0	0	0	0	0	0	0	0
PA14_RS07220 ←:1,544,709:I166F (ATC→TTC)	PA14_RS07220	PA14_17980	glpF	glycerol uptake facilitator protein	0	0	0	0	0	0	0	0.14	0	0	0	0	0	0	0	0	0	0	0	0	0	0	0	0	0	0.14	0
PA14_RS07220 ←:1,544,720:L162H (CTC→CAC)	PA14_RS07220	PA14_17980	glpF	glycerol uptake facilitator protein	0	0	-0.09	0.06	0	-0.11	0.09	0.09	0	0	0	0.09	0	0	0	0	0	0.11	0.06	0	0	0	0	0	0.09	0.09	0
PA14_RS06835 ← / ← map:1,462,014:intergenic (‑119/+48)	PA14_RS06835	PA14_17040	glnD	PII uridylyl-transferase	0	0	0	0	0	0	-0.08	0	0	0	0	0	0	0	0	0	0	0	0	0	0	0.08	0	0	0	0	0
glgA →:3,254,064:G186G (GGC→GGG)	glgA	PA14_36570	glgA	glycogen synthase	0	-0.26	0.05	0.03	-0.16	0	-0.23	-0.2	0.05	0	0.26	0.14	0	0	0.19	0.24	0.16	0.2	0.27	0	0.2	0.23	0.2	0.15	0	0	0.2
glgA →:3,254,071:T189P (ACG→CCG)	glgA	PA14_36570	glgA	glycogen synthase	0	0	0	0	0	0	-0.16	0	-0.16	0	0	0	0	0	0	0	0	0	0	0	0	0.16	0	0.16	0	0	0
glgA →:3,254,066:V187G (GTG→GGG)	glgA	PA14_36570	glgA	glycogen synthase	0	-0.16	0	0.15	0	0.13	-0.19	0.04	-0.11	0	0.16	0	0	0	0	0	0	0	0.15	0	0.13	0.19	0.15	0.11	0	0.19	0
glgA →:3,254,073:T189T (ACG→ACC)	glgA	PA14_36570	glgA	glycogen synthase	0	0	-0.01	0	0	0.14	0.23	0	0.11	0	0	0.11	0	0	0.1	0	0	0	0	0	0.14	0	0	0	0.23	0	0.11
glcE ←:6,295,038:R29G (CGC→GGC)	glcE	PA14_70680	glcE	glycolate oxidase FAD binding subunit	0	0	0	0	0	0	-0.06	0	0	0	0	0	0	0	0	0	0	0	0	0	0	0.06	0	0	0	0	0
PA14_RS14235 → / → PA14_RS14240:3,114,310:intergenic (+43/‑89)	PA14_RS14235	PA14_34970	gcd	glucose dehydrogenase	0	0	0	-0.17	0	0	0	0	0	0	0	0	0	0	0	0.17	0	0	0	0	0	0	0	0	0	0	0
PA14_RS14235 → / → PA14_RS14240:3,114,327:intergenic (+60/‑72)	PA14_RS14235	PA14_34970	gcd	glucose dehydrogenase	0	0	0	-0.17	0	0	0	0	0	0	0	0	0	0	0	0.17	0	0	0	0	0	0	0	0	0	0	0
PA14_RS14235 →:3,114,126:L757L (CTG→CTC)	PA14_RS14235	PA14_34970	gcd	glucose dehydrogenase	0	0	0	0	-0.16	0	0	0	0	0	0	0	0	0	0	0	0.16	0	0	0	0	0	0	0	0	0	0
PA14_RS14235 → / → PA14_RS14240:3,114,345:intergenic (+78/‑54)	PA14_RS14235	PA14_34970	gcd	glucose dehydrogenase	0	0	-0.13	0	0	0	0	0	0	0	0	0.13	0	0	0	0	0	0	0	0	0	0	0	0	0	0	0
PA14_RS18695 ← / → speB:4,096,885:intergenic (‑96/‑112)	PA14_RS18695	PA14_46060	gbuR	transcriptional regulator	0	0	0.05	0	0	0	0	0	0	0	0	0	0	0	0.05	0	0	0	0	0	0	0	0	0	0	0	0
gabT →:316,578:P407L (CCC→CTC)	gabT	PA14_03450	gabT	4-aminobutyrate aminotransferase	0	0	0	-0.05	0	0	0	0	0	0	0	0	0	0	0	0.05	0	0	0	0	0	0	0	0	0	0	0
gabP ←:144,266:L348R (CTG→CGG) ‡	gabP	PA14_01580	gabP	gamma-aminobutyrate permease	0	0	0	0	0	0	0	0	0.13	0	0	0	0	0	0	0	0	0	0	0	0	0	0	0	0	0	0.13
gabP ←:144,267:L348V (CTG→GTG)	gabP	PA14_01580	gabP	gamma-aminobutyrate permease	0	0	0	0	0.08	0	0	0	0	0	0	0	0	0	0	0	0	0	0	0.08	0	0	0	0	0	0	0
gabP ←:144,267:L348V (CTG→GTG) ‡	gabP	PA14_01580	gabP	gamma-aminobutyrate permease	0	0	0	0	0	0	0	0	0.08	0	0	0	0	0	0	0	0	0	0	0	0	0	0	0	0	0	0.08
gabP ←:144,269:V347G (GTG→GGG)	gabP	PA14_01580	gabP	gamma-aminobutyrate permease	0	0	0	0	-0.11	0	0.11	0	0.1	0	0	0	0	0	0	0	0.11	0	0	0	0	0	0	0	0.11	0	0.1
PA14_RS23665 ←:5,162,174:E445V (GAG→GTG)	PA14_RS23665	PA14_58030	fumC	fumarate hydratase	0	0.06	0	0	0	0	0	0	0	0	0	0	0	0.06	0	0	0	0	0	0	0	0	0	0	0	0	0
ftsZ ←:5,104,041:M1K (ATG→AAG) †	ftsZ	PA14_57275	ftsZ	cell division protein FtsZ	0	-0.07	-0.07	0	0	0	0	-0.06	0	0	0.07	0.07	0	0	0	0	0	0	0	0	0	0	0.06	0	0	0	0
PA14_RS12345 →:2,624,848:E726D (GAA→GAC)	PA14_RS12345	PA14_30290	ftsK	cell division protein FtsK	0	0	0	0	0	0	-0.06	0	0	0	0	0	0	0	0	0	0	0	0	0	0	0.06	0	0	0	0	0
folC →:2,075,797:Q67L (CAG→CTG)	folC	PA14_23880	folC	folylpolyglutamate synthetase	0	0	0	0	0	0	-0.06	0	0	0	0	0	0	0	0	0	0	0	0	0	0	0.06	0	0	0	0	0
folC →:2,076,699:A368P (GCC→CCC)	folC	PA14_23880	folC	folylpolyglutamate synthetase	0	0	0	0	-0.11	0	0	0.14	0	0	0	0	0	0	0	0	0.11	0	0	0	0	0	0	0	0	0.14	0
folC →:2,076,693:R366G (CGG→GGG)	folC	PA14_23880	folC	folylpolyglutamate synthetase	0	-0.11	0	-0.09	0	0	0	-0.09	-0.14	0	0.11	0	0	0	0	0.09	0	0	0	0	0	0	0.09	0.14	0	0	0
folC →:2,076,691:S365W (TCG→TGG)	folC	PA14_23880	folC	folylpolyglutamate synthetase	0	0.1	-0.11	0	0	0	-0.09	0.09	-0.11	0	0	0.11	0	0.1	0	0	0	0	0	0	0	0.09	0	0.11	0	0.09	0
fliH ←:4,454,286:coding (413‑421/807 nt)	fliH	PA14_50110	fliH	flagellar assembly protein H	0	0	0	0	0	0	0	0.21	0	0	0	0	0	0	0	0	0	0	0	0	0	0	0	0	0	0.21	0
flgK ←:4,477,101:S222T (AGC→ACC)	flgK	PA14_50360	flgK	flagellar hook-associated protein FlgK	0	0	0	0	0	0	0	0	-0.06	0	0	0	0	0	0	0	0	0	0	0	0	0	0	0.06	0	0	0
flgG ←:4,481,106:N180T (AAC→ACC)	flgG	PA14_50430	flgG	flagellar basal body rod protein FlgG	0	0	0	0	0	0.05	0	0	0	0	0	0	0	0	0	0	0	0	0	0	0.05	0	0	0	0	0	0
flgF ← / ← flgE:4,482,597:intergenic (‑157/+60)	flgF	PA14_50440	flgF	flagellar basal body rod protein FlgF	0	0	0	0	-0.26	0	0	0	0	0	0	0	0	0	0	0	0.26	0	0	0	0	0	0	0	0	0	0
PA14_RS20380 ←:4,459,771:coding (989/1209 nt)	PA14_RS20380	PA14_50200	fleS	two-component sensor	0	0.09	0	0	0	0	0	0	0	0	0	0	0	0.09	0	0	0	0	0	0	0	0	0	0	0	0	0
PA14_RS09655 →:2,070,543:G154A (GGC→GCC)	PA14_RS09655	PA14_23830	fimV	pilus assembly protein	0	0	0	0	0	0	0	0	0.06	0	0	0	0	0	0	0	0	0	0	0	0	0	0	0	0	0	0.06
PA14_RS04095 ←:871,039:L144V (CTG→GTG)	PA14_RS04095	PA14_10140	fepG	ferric enterobactin transport protein FepG	0	0.01	0	0	0	0	0	0	-0.1	0	0.07	0	0	0.08	0	0	0	0	0	0	0	0	0	0.1	0	0	0
PA14_RS04095 ←:871,041:A143G (GCG→GGG)	PA14_RS04095	PA14_10140	fepG	ferric enterobactin transport protein FepG	0	0	0	0	0	0	0	-0.06	0	0	0	0	0	0	0	0	0	0	0	0	0	0	0.06	0	0	0	0
PA14_RS07020 ←:1,500,546:L102H (CTC→CAC)	PA14_RS07020	PA14_17490	fdxA	ferredoxin I	0	0	0	0	0	0	0.07	0	0	0	0	0	0	0	0	0	0	0	0	0	0	0	0	0	0.07	0	0
rpoS → / ← PA14_RS07020:1,500,519:intergenic (+418/+8)	PA14_RS07020	PA14_17490	fdxA	ferredoxin I	0	0	0	0	0	0	0.08	0	0	0	0	0	0	0	0	0	0	0	0	0	0	0	0	0	0.08	0	0
PA14_RS26030 →:5,674,179:L79V (CTG→GTG)	PA14_RS26030	PA14_63640	fadH2	2,4-dienoyl-CoA reductase	0	0	0	0	-0.08	0	0	0	0	0	0	0	0	0	0	0	0.08	0	0	0	0	0	0	0	0	0	0
PA14_RS26030 →:5,674,176:L78V (CTG→GTG)	PA14_RS26030	PA14_63640	fadH2	2,4-dienoyl-CoA reductase	0	-0.07	0	-0.1	-0.13	-0.09	0	-0.07	0.12	0	0.07	0	0	0	0	0.1	0.13	0.09	0	0	0	0	0.07	0	0	0	0.12
PA14_RS09785 →:2,096,364:R293P (CGC→CCC)	PA14_RS09785	PA14_24170	fadH1	2,4-dienoyl-CoA reductase	0	0	-0.06	0	0	0	0	0	0	0	0	0.06	0	0	0	0	0	0	0	0	0	0	0	0	0	0	0
PA14_RS11245 ← / → PA14_RS11250:2,406,198:intergenic (‑46/‑107)	PA14_RS11245	PA14_27730	fadE	acyl-CoA dehydrogenase	0	0	0	0	0	0	-0.1	0	0.11	0	0	0	0	0	0	0	0	0	0	0	0	0.1	0	0	0	0	0.11
PA14_RS08420 ←:1,804,054:A162G (GCG→GGG)	PA14_RS08420	PA14_20950	fabH2	3-oxoacyl-ACP synthase	0	0	0	0	-0.06	0	0	0	0	0	0	0	0	0	0	0	0.06	0	0	0	0	0	0	0	0	0	0
PA14_RS08420 ←:1,804,226:F105V (TTC→GTC)	PA14_RS08420	PA14_20950	fabH2	3-oxoacyl-ACP synthase	0	0	0	0	0	0	0	-0.08	0	0	0	0	0	0	0	0	0	0	0	0	0	0	0.08	0	0	0	0
fabB →:3,891,522:V302V (GTC→GTG)	fabB	PA14_43690	fabB	3-oxoacyl-ACP synthase	0	0	0	0	0	0	0	-0.1	0	0	0	0	0	0	0	0	0	0	0	0	0	0	0.1	0	0	0	0
fabB →:3,891,527:D304A (GAC→GCC)	fabB	PA14_43690	fabB	3-oxoacyl-ACP synthase	0	0	0	0	0	0	0	-0.14	0	0	0	0	0	0	0	0	0	0	0	0	0	0	0.14	0	0	0	0
exsA ← / ← exsB:3,777,649:intergenic (‑123/+175)	exsA	PA14_42390	exsA	transcriptional regulator ExsA	0	0	0	0	-0.06	0	0	0	0	0	0	0	0	0	0	0	0.06	0	0	0	0	0	0	0	0	0	0
PA14_RS15790 →:3,465,887:Q283P (CAG→CCG)	PA14_RS15790	PA14_38860	exaA	quinoprotein alcohol dehydrogenase	0	0.1	0	0	0	0	0	0	0	0	0	0	0	0.1	0	0	0	0	0	0	0	0	0	0	0	0	0
PA14_RS06875 →:1,468,153:I77F (ATC→TTC)	PA14_RS06875	PA14_17130	dxr	1-deoxy-D-xylulose 5-phosphate reductoisomerase	0	0	0	0	0	0	-0.06	0	0	0	0	0	0	0	0	0	0	0	0	0	0	0.06	0	0	0	0	0
dsbG →:2,833,073:P226P (CCG→CCC)	dsbG	PA14_32610	dsbG	disulfide isomerase/thiol-disulfide oxidase	0	0	0	0.07	0	0	0	0	0	0	0	0	0	0	0	0	0	0	0.07	0	0	0	0	0	0	0	0
PA14_RS23815 →:5,202,231:A525A (GCC→GCA)	PA14_RS23815	PA14_58390	dppA3	dipeptide ABC transporter substrate-binding protein DppA3	0	0	0	-0.05	0	0	0	0	0	0	0	0	0	0	0	0.05	0	0	0	0	0	0	0	0	0	0	0
PA14_RS23815 →:5,202,242:V529E (GTA→GAA)	PA14_RS23815	PA14_58390	dppA3	dipeptide ABC transporter substrate-binding protein DppA3	0	0	-0.06	0	0	-0.05	0	0	0	0	0	0.06	0	0	0	0	0	0.05	0	0	0	0	0	0	0	0	0
PA14_RS23795 → / → PA14_RS23800:5,196,701:intergenic (+19/‑75)	PA14_RS23795	PA14_58350	dppA1	dipeptide ABC transporter substrate-binding protein DppA1	0	0	0	0	0	0	0.16	0.11	0	0	0	0	0	0	0	0	0	0	0	0	0	0	0	0	0.16	0.11	0
PA14_RS23795 → / → PA14_RS23800:5,196,736:intergenic (+54/‑40)	PA14_RS23795	PA14_58350	dppA1	dipeptide ABC transporter substrate-binding protein DppA1	0	0	0	0	0	0	0	0.08	0	0	0	0	0	0	0	0	0	0	0	0	0	0	0	0	0	0.08	0
PA14_RS13910 →:3,031,959:L53Q (CTG→CAG)	PA14_RS13910	PA14_34110	dotU3	DotU3	0	0	0	0	0	0	0	0	-0.06	0	0	0	0	0	0	0	0	0	0	0	0	0	0	0.06	0	0	0
PA14_RS13910 →:3,031,971:I57N (ATC→AAC)	PA14_RS13910	PA14_34110	dotU3	DotU3	0	0	-0.07	0	0	0.06	0	0.06	0	0	0	0.07	0	0	0	0	0	0	0	0	0.06	0	0	0	0	0.06	0
dnaX ←:3,971,601:Q665P (CAG→CCG)	dnaX	PA14_44630	dnaX	DNA polymerase III subunits gamma and tau	0	0.2	0	0	0	0	0	-0.4	0.05	0	0	0	0	0.2	0	0	0	0	0	0	0	0	0.4	0.26	0	0	0.31
dnaX ←:3,971,576:D673E (GAT→GAA)	dnaX	PA14_44630	dnaX	DNA polymerase III subunits gamma and tau	0	0	0	0	0	-0.13	0	0	0	0	0	0	0	0	0	0	0	0.13	0	0	0	0	0	0	0	0	0
dnaX ←:3,971,607:E663A (GAG→GCG)	dnaX	PA14_44630	dnaX	DNA polymerase III subunits gamma and tau	0	0	0	0	0	0	0	0.19	0	0	0	0	0	0	0	0	0	0	0	0	0	0	0	0	0	0.19	0
dnaX ←:3,971,685:R637H (CGC→CAC)	dnaX	PA14_44630	dnaX	DNA polymerase III subunits gamma and tau	0	-0.11	0	0	0	0	0	0	0	0	0.11	0	0	0	0	0	0	0	0	0	0	0	0	0	0	0	0
dnaK ←:5,619,336:L569V (CTG→GTG)	dnaK	PA14_62970	dnaK	molecular chaperone DnaK	0	0	0	0.07	0	0	0	0	0	0.07	0	0	0.07	0	0	0	0	0	0.07	0	0	0	0	0	0	0	0
dnaK ←:5,619,372:A557P (GCC→CCC)	dnaK	PA14_62970	dnaK	molecular chaperone DnaK	0	0	0	0	0	-0.06	-0.05	0	0	0	0	0	0	0	0	0	0	0.06	0	0	0	0.05	0	0	0	0	0
PA14_RS03890 → / ← PA14_RS03895:826,043:intergenic (+19/+21)	PA14_RS03890	PA14_09600	ddlA	D-alanine--D-alanine ligase	0	0	0	0	0	0	0	-0.15	0.19	0	0	0	0	0	0	0	0	0	0	0	0	0	0.15	0	0	0	0.19
dapF →:6,216,279:P112R (CCG→CGG)	dapF	PA14_69690	dapF	diaminopimelate epimerase	0	0	0	0	0	0	0.06	0	0	0	0	0	0	0	0	0	0	0	0	0	0	0	0	0	0.06	0	0
dapF →:6,216,302:M120L (ATG→TTG)	dapF	PA14_69690	dapF	diaminopimelate epimerase	0	-0.09	-0.05	0	0	0	0	0.09	-0.1	0	0.09	0.05	0	0	0	0	0	0	0	0	0	0	0	0.1	0	0.09	0
dapB ←:5,617,688:D45V (GAC→GTC)	dapB	PA14_62940	dapB	dihydrodipicolinate reductase	0	0.06	0	0	0	0	0	-0.07	0	0	0	0	0	0.06	0	0	0	0	0	0	0	0	0.07	0	0	0	0
dapB ←:5,617,700:L41Q (CTG→CAG)	dapB	PA14_62940	dapB	dihydrodipicolinate reductase	0	0	0	0	0	0	0	0	0.07	0	0	0	0	0	0	0	0	0	0	0	0	0	0	0	0	0	0.07
dapB ←:5,617,731:T31S (ACG→TCG)	dapB	PA14_62940	dapB	dihydrodipicolinate reductase	0	0	-0.08	0	0	0	0	0	0	0	0	0.08	0	0	0	0	0	0	0	0	0	0	0	0	0	0	0
PA14_RS20840 ←:4,556,041:M214L (ATG→TTG)	PA14_RS20840	PA14_51270	dapA	dihydrodipicolinate synthase	0	0	0	0	0	0	0.06	0.02	0	0	0	0	0	0	0	0	0	0	0	0	0	0	0.06	0	0.06	0.08	0
cysM ←:4,630,442:E136D (GAA→GAC)	cysM	PA14_52210	cysM	cysteine synthase B	0	0	0	0	0	-0.12	0	0	0	0	0	0	0	0	0	0	0	0.12	0	0	0	0	0	0	0	0	0
PA14_RS28375 →:6,212,345:L921V (CTG→GTG)	PA14_RS28375	PA14_69610	cyaA	adenylate cyclase	0	0	0	0	0	0	0	0	1	0	0	0	0	0	0	0	0	0	0	0	0	0	0	0	0	0	1
PA14_RS24355 → / → PA14_RS24360:5,314,093:intergenic (+18/‑71)	PA14_RS24355	PA14_59710	cupD1	fimbrial protein	0	0.08	0	0	0	-0.06	0	0	0	0	0	0	0	0.08	0	0	0	0.06	0	0	0	0	0	0	0	0	0
PA14_RS04485 →:965,781:K263* (AAG→TAG)	PA14_RS04485	PA14_11110	cupB6	fimbrial protein cupB6	0	-0.18	0	0	0	0	0	0	0	0	0.18	0	0	0	0	0	0	0	0	0	0	0	0	0	0	0	0
PA14_RS04480 →:963,432:G532R (GGC→CGC)	PA14_RS04480	PA14_11100	cupB5	adhesive protein CupB5	0	0	0	0	0	0	-0.11	0	0	0	0	0	0	0	0	0	0	0	0	0	0	0.11	0	0	0	0	0
PA14_RS04480 →:963,479:N547K (AAT→AAA)	PA14_RS04480	PA14_11100	cupB5	adhesive protein CupB5	0	0	0	0	0	-0.06	0	0	0	0	0	0	0	0	0	0	0	0.06	0	0	0	0	0	0	0	0	0
PA14_RS15080 ← / ← PA14_RS15085:3,300,337:intergenic (‑74/+14)	PA14_RS15080	PA14_37040	cupA2	chaperone CupA2	0	0	0.16	0	0	0	-0.23	0	0	0	0	0	0	0	0.16	0	0	0	0	0	0	0.23	0	0	0	0	0
PA14_RS15080 ← / ← PA14_RS15085:3,300,333:intergenic (‑70/+18)	PA14_RS15080	PA14_37040	cupA2	chaperone CupA2	0	0	0.11	0	0	0	0	0	0	0	0	0	0	0	0.11	0	0	0	0	0	0	0	0	0	0	0	0
PA14_RS15080 ← / ← PA14_RS15085:3,300,336:intergenic (‑73/+15)	PA14_RS15080	PA14_37040	cupA2	chaperone CupA2	0	0.1	0	0	-0.12	-0.12	0.1	-0.14	0.1	0.11	0	0	0.11	0.1	0	0	0.12	0.12	0	0	0	0	0.14	0	0.1	0	0.1
PA14_RS15080 ← / ← PA14_RS15085:3,300,340:intergenic (‑77/+11)	PA14_RS15080	PA14_37040	cupA2	chaperone CupA2	0	0	0	0	0	0.18	-0.16	0	-0.15	0	0	0	0	0	0	0	0	0	0	0	0.18	0.16	0	0.15	0	0	0
PA14_RS11825 → / → PA14_RS11830:2,509,912:intergenic (+24/‑103)	PA14_RS11825	PA14_29020	cpo	chloroperoxidase	0	0	0	-1	0	0	1	0	-1	0	0	0	0	0	0	1	0	0	0	0	0	0	0	1	1	0	0
cobN ←:3,530,410:R824P (CGC→CCC)	cobN	PA14_25970	cobN	cobaltochelatase subunit CobN	0	0	0	0	0	0	0	-0.06	0	0	0	0	0	0	0	0	0	0	0	0	0	0	0.06	0	0	0	0
PA14_RS10715 ←:2,305,070:P143P (CCG→CCC)	PA14_RS10715	PA14_26460	cobK	cobalt-precorrin-6x reductase	0	0	0	0	0	0	-0.06	0	0	0	0	0	0	0	0	0	0	0	0	0	0	0.06	0	0	0	0	0
PA14_RS10715 ←:2,305,162:W113R (TGG→AGG)	PA14_RS10715	PA14_26460	cobK	cobalt-precorrin-6x reductase	0	0	0	0	0	0	0	0	-0.07	0	0	0	0	0	0	0	0	0	0	0	0	0	0	0.07	0	0	0
PA14_RS10715 ←:2,305,180:W107R (TGG→AGG)	PA14_RS10715	PA14_26460	cobK	cobalt-precorrin-6x reductase	0	0	0	0	0	0	0	-0.08	0	0	0	0	0	0	0	0	0	0	0	0	0	0	0.08	0	0	0	0
PA14_RS10715 ←:2,305,200:Q100P (CAG→CCG)	PA14_RS10715	PA14_26460	cobK	cobalt-precorrin-6x reductase	0	0	0	0	0	0	-0.07	-0.1	0	0	0	0	0	0	0	0	0	0	0	0	0	0.07	0.1	0	0	0	0
PA14_RS10735 →:2,309,825:L66R (CTG→CGG)	PA14_RS10735	PA14_26500	cobH	precorrin-8X methylmutase	0	0.16	0	0	0	0	0	0	0	0	0	0	0	0.16	0	0	0	0	0	0	0	0	0	0	0	0	0
PA14_RS10735 →:2,309,776:D50N (GAC→AAC)	PA14_RS10735	PA14_26500	cobH	precorrin-8X methylmutase	0	0	0	-0.06	0	0	0	0	0	0	0	0	0	0	0	0.06	0	0	0	0	0	0	0	0	0	0	0
cntI ←:5,695,697:A187G (GCC→GGC)	cntI	PA14_63910	cntI	CntI	0	0	0	0	0	0	0	0.16	0	0	0	0	0	0	0	0	0	0	0	0	0	0	0	0	0	0.16	0
clpB ← / ← pgeF:5,362,568:intergenic (‑129/+27)	clpB	PA14_60190	clpB	clpB protein	0	0	0	0	0	0	0	0.05	0	0	0	0	0	0	0	0	0	0	0	0	0	0	0	0	0	0.05	0
clpA →:2,618,509:Y393F (TAC→TTC)	clpA	PA14_30230	clpA	ATP-dependent Clp protease, ATP-binding subunit ClpA	0	0	0	0	0	0	0	0.07	0	0	0	0	0	0	0	0	0	0	0	0	0	0	0	0	0	0.07	0
clpA →:2,618,481:R384G (CGC→GGC)	clpA	PA14_30230	clpA	ATP-dependent Clp protease, ATP-binding subunit ClpA	0	0	-0.15	0	-0.15	0	0	0	0	0	0	0.15	0	0	0	0	0.15	0	0	0	0	0	0	0	0	0	0
ccmA ←:4,042,194:R148P (CGC→CCC)	ccmA	PA14_45380	ccmA	cytochrome c biogenesis protein CcmA	0	0.07	0	0	0	-0.1	0	-0.06	0	0	0	0	0	0.07	0	0	0	0.1	0	0	0	0	0.06	0	0	0	0
ccmA ←:4,042,199:Q146H (CAG→CAC)	ccmA	PA14_45380	ccmA	cytochrome c biogenesis protein CcmA	0	0	0	0	-0.09	0	0	0	0	0	0	0	0	0	0	0	0.09	0	0	0	0	0	0	0	0	0	0
PA14_RS25560 → / → PA14_RS25565:5,580,549:intergenic (+193/‑707)	PA14_RS25560	PA14_62540	cbrB	PA14_RS25560 → / → PA14_RS25565:5,580+B1029,549:intergenic (+193/‑707)	0	0	0.1	0	0	0	0	0	0	0	0	0	0	0	0.1	0	0	0	0	0	0	0	0	0	0	0	0
[PA14_RS25560]:5,578,919:	PA14_RS25560	PA14_62540	cbrB	two-component response regulator CbrB	0	0	0	0	0	0	0	0	0	0	0	0	0	0	0	0	0	0	0	0	0	98.9	1	1	1	1	1
PA14_RS25555 →:5,575,978:coding (37‑2916/2952 nt)	PA14_RS25555	PA14_62530	cbrA	two-component sensor CbrA	0	0	0	0	0	0	0	0	0	0	0	0	0	0	0	1	1	1	1	1	1	0	0	0	0	0	0
PA14_RS13135 ←:2,799,957:R50R (CGC→CGG)	PA14_RS13135	PA14_32200	catR	transcriptional regulator CatR	0	0	0	0	0	-0.08	0	0	0	0	0	0	0	0	0	0	0	0.08	0	0	0	0	0	0	0	0	0
catA →:2,802,045:L97H (CTC→CAC)	catA	PA14_32240	catA	catechol 1,2-dioxygenase	0	0.05	0	0	0	0	0	0	0	0	0	0	0	0.05	0	0	0	0	0	0	0	0	0	0	0	0	0
PA14_RS14450 ←:3,158,464:M389L (ATG→TTG)	PA14_RS14450	PA14_35530	bkdA1	2-oxoisovalerate dehydrogenase subunit alpha	0	0	0	0	0	0	-0.1	0	0	0	0	0	0	0	0	0	0	0	0	0	0	0.1	0	0	0	0	0
bglX →:3,766,994:A242G (GCG→GGG)	bglX	PA14_42230	bglX	beta-glucosidase	0	0	0	0	0	0	0	0	-0.07	0	0	0	0	0	0	0	0	0	0	0	0	0	0	0.07	0	0	0
PA14_RS28910 →:6,325,452:A297G (GCC→GGC)	PA14_RS28910	PA14_70980	betT1	choline transporter BetT	0	0	0	0	0	0	0	0.14	0	0	0	0	0	0	0	0	0	0	0	0	0	0	0	0	0	0.14	0
PA14_RS15685 → / ← PA14_RS15690:3,444,199:intergenic (+86/+105)	PA14_RS15685	PA14_38590	bdhA	3-hydroxybutyrate dehydrogenase	0	-0.08	0	0	0	0	0	0	0	0	0.08	0	0	0	0	0	0	0	0	0	0	0	0	0	0	0	0
PA14_RS15910 ←:3,490,445:G198A (GGC→GCC)	PA14_RS15910	PA14_39190	bacA	UDP pyrophosphate phosphatase	0	0	0	0.09	0	0	0	0	0	0	0	0	0	0	0	0	0	0	0.09	0	0	0	0	0	0	0	0
aspS ←:4,601,647:M477K (ATG→AAG)	aspS	PA14_51820	aspS	aspartyl-tRNA synthetase	0	0	0.07	0	0	0	0	0	0	0	0	0	0	0	0.07	0	0	0	0	0	0	0	0	0	0	0	0
PA14_RS17010 →:3,743,902:K349Q (AAG→CAG)	PA14_RS17010	PA14_41920	aroF-1	phospho-2-dehydro-3-deoxyheptonate aldolase	0	0	-0.06	0	0	0	0	0	0	0	0	0.06	0	0	0	0	0	0	0	0	0	0	0	0	0	0	0
arnT ←:1,573,102:G46G (GGC→GGG)	arnT	PA14_18330	arnT	4-amino-4-deoxy-L-arabinose transferase	0	0.11	0	0	0	0	0	0	0	0	0	0	0	0.11	0	0	0	0	0	0	0	0	0	0	0	0	0
arnT ←:1,573,087:P51P (CCG→CCC)	arnT	PA14_18330	arnT	4-amino-4-deoxy-L-arabinose transferase	0	0	0	0	0	0	0	0	-0.07	0	0	0	0	0	0	0	0	0	0	0	0	0	0	0.07	0	0	0
PA14_RS21460 ←:4,672,520:E388Q (GAG→CAG)	PA14_RS21460	PA14_52720	argD	bifunctional N-succinyldiaminopimelate-aminotransferase/acetylornithine transaminase	0	0	0	0	0	0	0	0	0.08	0	0	0	0	0	0	0	0	0	0	0	0	0	0	0	0	0	0.08
PA14_RS21460 ←:4,672,523:A387P (GCC→CCC)	PA14_RS21460	PA14_52720	argD	bifunctional N-succinyldiaminopimelate-aminotransferase/acetylornithine transaminase	0	0	0	0	0	0	0.09	0	0	0	0	0	0	0	0	0	0	0	0	0	0	0	0	0	0.09	0	0
PA14_RS03415 →:726,035:Q23H (CAG→CAC)	PA14_RS03415	PA14_08480	argC	N-acetyl-gamma-glutamyl-phosphate reductase	0	0	0	0	0	0	-0.07	0	0.08	0	0	0	0	0	0	0	0	0	0	0	0	0.07	0	0	0	0	0.08
argB →:6,267,609:R300R (CGT→CGA)	argB	PA14_70280	argB	acetylglutamate kinase	0	0	0	0	0.07	0	0	0	0	0	0	0	0	0	0	0	0	0	0	0.07	0	0	0	0	0	0	0
argA ←:6,131,462:A69G (GCC→GGC)	argA	PA14_68740	argA	N-acetylglutamate synthase	0	0	0.03	0	-0.07	0	0	0	0	0	0	0.05	0	0	0.08	0	0.07	0	0	0	0	0	0	0	0	0	0
argA ←:6,131,502:L56V (CTG→GTG)	argA	PA14_68740	argA	N-acetylglutamate synthase	0	0	0	0	-0.1	0.03	0	0	0.05	0	0	0	0	0	0	0	0.1	0.07	0	0	0.1	0	0	0	0	0	0.05
arcD →:6,093,196:S37R (AGC→AGG)	arcD	PA14_68300	arcD	arginine/ornithine antiporter	0	0	0	0	-0.07	0	0	0	0	0	0	0	0	0	0	0	0.07	0	0	0	0	0	0	0	0	0	0
arcD →:6,093,207:G41A (GGC→GCC)	arcD	PA14_68300	arcD	arginine/ornithine antiporter	0	0	0	0	0	0.07	0	0	0	0	0	0	0	0	0	0	0	0	0	0	0.07	0	0	0	0	0	0
PA14_RS14420 ←:3,151,693:A102G (GCG→GGG)	PA14_RS14420	PA14_35440	ansA	L-asparaginase I	0	0	0	0.12	0	0	0	0	-0.1	0	0	0	0	0	0	0	0	0	0.12	0	0	0	0	0.1	0	0	0
pvcA ← / ← PA14_RS14420:3,151,002:intergenic (‑207/+9)	PA14_RS14420	PA14_35440	ansA	L-asparaginase I	0	0	0	0	-0.09	0	0	0	0	0	0	0	0	0	0	0	0.09	0	0	0	0	0	0	0	0	0	0
PA14_RS08255 → / → PA14_RS08260:1,769,670:intergenic (+22/‑62)	PA14_RS08255	PA14_20560	amiE	acylamide amidohydrolase	0	0	-0.07	0	0	0	0	0	0	0	0	0.07	0	0	0	0	0	0	0	0	0	0	0	0	0	0	0
algR ←:6,195,018:A163S (GCC→TCC)	algR	PA14_69470	algR	alginate biosynthesis regulatory protein AlgR	0	0	0	0	0	0	0	0	0.06	0	0	0	0	0	0	0	0	0	0	0	0	0	0	0	0	0	0.06
algD ← / ← yaaA:1,595,336:intergenic (‑28/+875)	algD	PA14_18580	algD	GDP-mannose 6-dehydrogenase AlgD	0	0	0	0	0	0	0	0	-0.08	0	0	0	0	0	0	0	0	0	0	0	0	0	0	0.08	0	0	0
algD ← / ← yaaA:1,595,354:intergenic (‑46/+857)	algD	PA14_18580	algD	GDP-mannose 6-dehydrogenase AlgD	0	0	0	0	-0.09	0	-0.07	0	0	0	0	0	0	0	0	0	0.09	0	0	0	0	0.07	0	0	0	0	0
algD ← / ← yaaA:1,595,351:intergenic (‑43/+860)	algD	PA14_18580	algD	GDP-mannose 6-dehydrogenase AlgD	0	-0.07	0	0	0	0	0	0	0	0	0.07	0	0	0	0	0	0	0	0	0	0	0	0	0	0	0	0
PA14_RS28620 →:6,264,633:A182P (GCC→CCC)	PA14_RS28620	PA14_70270	algC	phosphomannomutase	0	0	0	0	0	0	0	0	-0.06	0	0	0	0	0	0	0	0	0	0	0	0	0	0	0.06	0	0	0
PA14_RS28620 →:6,264,640:P184R (CCG→CGG)	PA14_RS28620	PA14_70270	algC	phosphomannomutase	0	0	0	0	0	0	0	0	-0.11	0	0	0	0	0	0	0	0	0	0	0	0	0	0	0.11	0	0	0
PA14_RS28620 →:6,264,674:T195T (ACG→ACC)	PA14_RS28620	PA14_70270	algC	phosphomannomutase	0	0	0	0	0	0	0	0	-0.11	0	0	0	0	0	0	0	0	0	0	0	0	0	0	0.11	0	0	0
PA14_RS28620 →:6,264,650:G187G (GGC→GGG)	PA14_RS28620	PA14_70270	algC	phosphomannomutase	0	-0.11	0	0	0	0	0	-0.15	0	0	0.11	0	0	0	0	0	0	0	0	0	0	0	0.15	0	0	0	0
PA14_RS28620 →:6,264,647:R186R (CGC→CGG) ‡	PA14_RS28620	PA14_70270	algC	phosphomannomutase	0	0.12	-0.13	0	0	-0.12	-0.1	0.03	0.15	0	0	0.13	0	0.12	0	0	0	0.12	0	0	0	0.1	0.11	0	0	0.14	0.15
PA14_RS28620 →:6,264,632:S181R (AGC→AGG)	PA14_RS28620	PA14_70270	algC	phosphomannomutase	0	0	-0.18	0	-0.15	0	0	0	-0.17	0	0	0.18	0	0	0	0	0.15	0	0	0	0	0	0	0.17	0	0	0
PA14_RS28620 →:6,264,645:R186G (CGC→GGC) ‡	PA14_RS28620	PA14_70270	algC	phosphomannomutase	0	0.19	-0.21	0	0	-0.22	-0.18	0.02	0.21	0	0	0.21	0	0.19	0	0	0	0.22	0	0	0	0.18	0.19	0	0	0.21	0.21
ahpC → / → ahpF:156,785:intergenic (+58/‑87)	ahpC	PA14_01710	ahpC	alkyl hydroperoxide reductase	0	0	1	0	0	0	0	0	0	0	0	0	0	0	1	0	0	0	0	0	0	0	0	0	0	0	0
ahpC → / → ahpF:156,775:intergenic (+48/‑97)	ahpC	PA14_01710	ahpC	alkyl hydroperoxide reductase	0	0	0.24	0	0	0	0	0	0	0	0	0	0	0	0.24	0	0	0	0	0	0	0	0	0	0	0	0
ahpC → / → ahpF:156,757:intergenic (+30/‑115)	ahpC	PA14_01710	ahpC	alkyl hydroperoxide reductase	0	-0.12	0.15	0	0	0	-0.01	0	0	0	0.12	0	0	0	0.15	0	0	0	0	0	0	0.2	0	0	0.19	0	0
ahpC → / → ahpF:156,747:intergenic (+20/‑125)	ahpC	PA14_01710	ahpC	alkyl hydroperoxide reductase	0	0	0	-0.09	0	0	0.12	0	-0.17	0	0	0	0	0	0	0.09	0	0	0	0	0	0	0	0.17	0.12	0	0
ahpC → / → ahpF:156,742:intergenic (+15/‑130)	ahpC	PA14_01710	ahpC	alkyl hydroperoxide reductase	0	0	-0.13	0	0	0	0	0	0	0	0	0.13	0	0	0	0	0	0	0	0	0	0	0	0	0	0	0
PA14_RS17995 →:3,944,687:N371T (AAC→ACC)	PA14_RS17995	PA14_44300	aer	aerotaxis receptor Aer	0	0	0	0	0	-0.12	-0.08	0	0	0	0	0	0	0	0	0	0	0.12	0	0	0	0.08	0	0	0	0	0
PA14_RS17995 →:3,944,696:I374S (ATC→AGC)	PA14_RS17995	PA14_44300	aer	aerotaxis receptor Aer	0	0	0	0.09	0	0	0	0	0	0	0	0	0	0	0	0	0	0	0.09	0	0	0	0	0	0	0	0
PA14_RS17995 →:3,944,906:S444T (AGC→ACC)	PA14_RS17995	PA14_44300	aer	aerotaxis receptor Aer	0	0	-0.06	0	0	0	0	0	0	0	0	0.06	0	0	0	0	0	0	0	0	0	0	0	0	0	0	0
PA14_RS04165 → / → PA14_RS04170:888,406:intergenic (+52/‑18)	PA14_RS04165	PA14_10290	acoR	transcriptional regulator AcoR	0	0	0	0	0	0	-0.08	0	0	0	0	0	0	0	0	0	0	0	0	0	0	0.08	0	0	0	0	0
PA14_RS04165 →:887,666:A397G (GCG→GGG)	PA14_RS04165	PA14_10290	acoR	transcriptional regulator AcoR	0	0	0	0	0	-0.08	0	0	0	0	0	0	0	0	0	0	0	0.08	0	0	0	0	0	0	0	0	0
PA14_RS04145 ←:883,046:V78G (GTC→GGC)	PA14_RS04145	PA14_10250	acoB	acetoin catabolism protein AcoB	0	0.04	-0.03	0	0	-0.06	0	0	-0.03	0	0.07	0.1	0	0.11	0.07	0	0	0.06	0	0	0	0	0	0.11	0	0	0.08
PA14_RS04145 ←:883,041:A80P (GCC→CCC)	PA14_RS04145	PA14_10250	acoB	acetoin catabolism protein AcoB	0	0	-0.08	-0.08	-0.09	0	-0.07	0	0	0	0	0.08	0	0	0	0.08	0.09	0	0	0	0	0.07	0	0	0	0	0
aceK →:4,132,360:Y360N (TAC→AAC)	aceK	PA14_46450	aceK	bifunctional isocitrate dehydrogenase kinase/phosphatase	0	0	0.08	0.07	0	0	0	0	0	0	0	0	0	0	0.08	0	0	0	0.07	0	0	0	0	0	0	0	0
aceK →:4,132,364:Q361L (CAG→CTG)	aceK	PA14_46450	aceK	bifunctional isocitrate dehydrogenase kinase/phosphatase	0	0	0	0	0	0.09	0	0	0	0	0	0	0	0	0	0	0	0	0	0	0.09	0	0	0	0	0	0
aceE → / → aceF:5,910,255:intergenic (+54/‑91)	aceE	PA14_66290	aceE	pyruvate dehydrogenase subunit E1	0	0	-0.22	0	0.36	0	-0.24	0	0.26	0	0	0.22	0	0	0	0	0	0	0	0.36	0	0.24	0	0	0	0	0.26
PA14_RS12335 ←:2,621,153:C101W (TGT→TGG)	PA14_RS12335	PA14_30270	aat	leucyl/phenylalanyl-tRNA--protein transferase	0	0	0	0	0	-0.06	0	0	0	0	0	0	0	0	0	0	0	0.06	0	0	0	0	0	0	0	0	0
PA14_RS12335 ←:2,621,157:A100G (GCT→GGT)	PA14_RS12335	PA14_30270	aat	leucyl/phenylalanyl-tRNA--protein transferase	0	0	0	0	0	0	0	0	0.07	0	0	0	0	0	0	0	0	0	0	0	0	0	0	0	0	0	0.07
PA14_RS12335 ←:2,621,173:R95G (CGG→GGG)	PA14_RS12335	PA14_30270	aat	leucyl/phenylalanyl-tRNA--protein transferase	0	0	0	0	0	0	-0.11	0	0	0	0	0	0	0	0	0	0	0	0	0	0	0.11	0	0	0	0	0
PA14_RS18995 ←:4,165,321:R137P (CGC→CCC)	PA14_RS18995	PA14_46750		hypothetical protein	0	1	1	1	0	0	0	0	0	0	0	0	0	1	1	0	0	0	1	0	0	0	0	0	0	0	0
PA14_RS12370 ←:2,629,954:A307G (GCG→GGG)	PA14_RS12370	PA14_30350		hypothetical protein	0	0	0.25	0.25	0	-0.2	0.18	-0.22	0	0	0	0	0	0	0.25	0	0	0.2	0.25	0	0	0	0.22	0	0.18	0	0
PA14_RS11305 ←:2,414,965:L123R (CTC→CGC)	PA14_RS11305	PA14_27890		hypothetical protein	0	0.37	0.23	0	0.34	0.06	0.23	-0.03	-0.04	0.3	0	0	0.3	0.37	0.23	0.28	0	0.25	0.28	0.34	0.31	0	0.3	0.33	0.23	0.27	0.29
PA14_RS14255 ←:3,117,865:A414A (GCG→GCC)	PA14_RS14255	PA14_35020		hypothetical protein	0	0	0.23	0	0	0	0	0	0	0	0	0	0	0	0.23	0	0	0	0	0	0	0	0	0	0	0	0
PA14_RS13025 ← / ← PA14_RS13030:2,769,026:intergenic (‑183/+14)	PA14_RS13025	PA14_31820		aminotransferase	0	0	0.22	0	0	0	0	0	0.23	0	0	0	0	0	0.22	0	0	0	0	0	0	0	0	0	0	0	0.23
PA14_RS19200 →:4,209,330:A151G (GCC→GGC) ‡	PA14_RS19200	PA14_47240		transcriptional regulator	0	0	0.22	-0.16	0	0.14	0	-0.04	-0.22	0	0	0	0	0	0.22	0.16	0	0	0	0	0.14	0	0.24	0.22	0	0.2	0
PA14_RS05100 ← / ← PA14_RS05105:1,086,465:intergenic (‑78/+12)	PA14_RS05100	PA14_12650		hypothetical protein	0	0	0.18	0	0	0	0	0	0	0	0	0	0	0	0.18	0	0	0	0	0	0	0	0	0	0	0	0
PA14_RS15360 →:3,368,194:R142R (AGG→CGG) ‡	PA14_RS15360	PA14_37770		hydrolase	0	0	0.17	0	0	0	0	0	0	0	0	0	0	0	0.17	0	0	0	0	0	0	0	0	0	0	0	0
PA14_RS17675 ←:3,875,924:E207V (GAG→GTG)	PA14_RS17675	PA14_43520		hypothetical protein	0	0	0.17	0	-0.08	-0.16	-0.03	0.06	-0.19	0	0	0	0	0	0.17	0	0.23	0.16	0	0.15	0	0.18	0.18	0.19	0.15	0.24	0
PA14_RS28935 → / ← PA14_RS28940:6,332,718:intergenic (+23/+23)	PA14_RS28935	PA14_71070		AraC family transcriptional regulator	0	-0.11	0.17	0	0	0	-0.09	-0.03	0	0	0.11	0	0	0	0.17	0	0	0	0	0	0	0.09	0.12	0	0	0.09	0
PA14_RS22305 →:4,855,710:A5P (GCG→CCG)	PA14_RS22305	PA14_54790		hypothetical protein	0	0.1	0.16	0	0	0	0	0	0	0	0	0	0	0.1	0.16	0	0	0	0	0	0	0	0	0	0	0	0
PA14_RS06335 ← / ← PA14_RS06340:1,350,755:intergenic (‑159/+84)	PA14_RS06335	PA14_15830		GntR family transcriptional regulator	0	0	0.16	0	0	0	0	0	0	0	0	0	0	0	0.16	0	0	0	0	0	0	0	0	0	0	0	0
PA14_RS18720 →:4,102,473:G331G (GGC→GGG)	PA14_RS18720	PA14_46120		hypothetical protein	0	0	0.16	0.22	0	0	0	0	-0.23	0	0	0	0	0	0.16	0	0	0	0.22	0	0	0	0	0.23	0	0	0
PA14_RS19120 → / ← PA14_RS19125:4,191,774:intergenic (+39/+17)	PA14_RS19120	PA14_47040		TerC family protein	0	0	0.16	0	0	0	0	0	0	0	0	0	0	0	0.16	0	0	0	0	0	0	0	0	0	0	0	0
PA14_RS21930 ←:4,774,807:R208P (CGC→CCC)	PA14_RS21930	PA14_53850		oxidoreductase	0	0	0.16	0	0	-0.18	-0.17	0	0.09	0	0	0	0	0	0.16	0	0	0.18	0	0	0	0.17	0	0.11	0	0	0.2
PA14_RS16130 →:3,547,485:T194P (ACC→CCC)	PA14_RS16130	PA14_39810		transmembrane sensor	0	0.12	0.15	0.15	0	0	0	0.24	0.02	0	0	0	0	0.12	0.15	0	0	0	0.15	0	0	0	0	0.17	0	0.24	0.19
PA14_RS19200 →:4,209,331:A151A (GCC→GCG) ‡	PA14_RS19200	PA14_47240		transcriptional regulator	0	0	0.15	-0.12	0	0.14	0	-0.02	-0.15	0	0	0	0	0	0.15	0.12	0	0	0	0	0.14	0	0.13	0.15	0	0.11	0
PA14_RS27750 →:6,072,156:P133R (CCG→CGG)	PA14_RS27750	PA14_68050		hypothetical protein	0	0	0.15	0	0	0.16	0	0	0.17	0	0	0	0	0	0.15	0	0	0	0	0	0.16	0	0	0	0	0	0.17
PA14_RS28185 ←:6,167,336:L47V (CTG→GTG)	PA14_RS28185	PA14_69140		CDP-6-deoxy-delta-3,4-glucoseen reductase	0	0	0.14	0	0	0	0	0	0	0	0	0	0	0	0.14	0	0	0	0	0	0	0	0	0	0	0	0
ada ← / → PA14_RS15150:3,313,807:intergenic (‑63/‑129)	PA14_RS15150	PA14_37200		hypothetical protein	0	0	0.13	0	0	0	0	0	0	0	0	0	0	0	0.13	0	0	0	0	0	0	0	0	0	0	0	0
PA14_RS04805 ← / ← PA14_RS04810:1,029,382:intergenic (‑45/+2)	PA14_RS04805	PA14_11890		hypothetical protein	0	0	0.13	0	0	0	0	0	0	0	0	0	0	0	0.13	0	0	0	0	0	0	0	0	0	0	0	0
PA14_RS05000 ← / ← hemL:1,066,284:intergenic (‑182/+27)	PA14_RS05000	PA14_12370		hypothetical protein	0	0	0.13	0	-0.17	-0.14	0	-0.13	-0.13	0	0	0	0	0	0.13	0	0.17	0.14	0	0	0	0.15	0.13	0.13	0.15	0	0
hydA ← / → PA14_RS02340:511,409:intergenic (‑403/‑213)	PA14_RS02340	PA14_05790		transporter	0	0	0.12	0	0	-0.08	0	0	0	0	0	0	0	0	0.12	0	0	0.08	0	0	0	0	0	0	0	0	0
PA14_RS01530 → / → PA14_RS01535:336,199:intergenic (+101/‑128)	PA14_RS01530	PA14_03730		fatty acid desaturase	0	0	0.12	0	0	0	0	0	0	0	0	0	0	0	0.12	0	0	0	0	0	0	0	0	0	0	0	0
PA14_RS10695 ←:2,299,843:G230A (GGC→GCC)	PA14_RS10695	PA14_26390		hypothetical protein	0	0	0.12	-0.1	-0.1	0	-0.1	0	0	0	0	0	0	0	0.12	0.1	0.1	0	0	0	0	0.1	0	0	0	0	0
PA14_RS20025 ←:4,379,800:G511G (GGT→GGG)	PA14_RS20025	PA14_49300		lipoxygenase	0	0.06	0.11	0	0	0	-0.07	0	-0.08	0	0	0	0	0.06	0.11	0	0	0	0	0	0	0.07	0	0.08	0	0	0
PA14_RS26485 ←:5,772,775:E435A (GAG→GCG)	PA14_RS26485	PA14_64790		MFS transporter	0	0	0.11	0	0	0	0	0	0	0	0	0	0	0	0.11	0	0	0	0	0	0	0	0	0	0	0	0
PA14_RS26900 ← / ← PA14_RS26905:5,870,471:intergenic (‑32/+86)	PA14_RS26900	PA14_65880		two-component response regulator	0	0	0.11	-0.16	0	0	0	0	0	0	0	0	0	0	0.11	0.16	0	0	0	0	0	0	0	0	0	0	0
PA14_RS00500 →:117,292:A62P (GCC→CCC)	PA14_RS00500	PA14_01190		3-oxoacyl-ACP synthase	0	-0.09	0.11	0.32	-0.42	0	0.31	-0.29	-0.22	0	0.41	0.35	0	0.32	0.46	0	0.42	0	0.32	0	0	0	0.29	0.22	0.31	0	0
PA14_RS21870 →:4,763,298:F255Y (TTC→TAC)	PA14_RS21870	PA14_53720		transcriptional regulator	0	0.21	0.1	0	0.13	0	-0.13	0	0	0	0	0	0	0.21	0.1	0	0	0	0	0.13	0	0.13	0	0	0	0	0
PA14_RS03330 →:707,789:T6T (ACG→ACC)	PA14_RS03330	PA14_08300		phage-related protein, tail component	0	0	0.1	0	0	-0.06	0	0	0	0	0	0	0	0	0.1	0	0	0.06	0	0	0	0	0	0	0	0	0
PA14_RS08240 →:1,765,385:Q630L (CAG→CTG)	PA14_RS08240	PA14_20520		hypothetical protein	0	0	0.1	0	0	0	0	0	0	0	0	0	0	0	0.1	0	0	0	0	0	0	0	0	0	0	0	0
PA14_RS17375 →:3,805,470:W123G (TGG→GGG)	PA14_RS17375	PA14_42780		hypothetical protein	0	0	0.1	0.09	0	0	0	0	0.07	0	0	0	0	0	0.1	0	0	0	0.09	0	0	0	0	0	0	0	0.07
PA14_RS06780 →:1,450,169:N212T (AAC→ACC)	PA14_RS06780	PA14_16910		hypothetical protein	0	-0.1	0.1	0	0	0	0	0	0	0	0.1	0	0	0	0.1	0	0	0	0	0	0	0	0	0	0	0	0
PA14_RS05280 →:1,128,130:M639I (ATG→ATT)	PA14_RS05280	PA14_13130		hypothetical protein	0	0.08	0.09	0	-0.1	-0.07	-0.1	0.11	0	0.09	0	0	0.09	0.08	0.09	0	0.1	0.07	0	0	0	0.1	0	0	0	0.11	0
PA14_RS00100 → / → dprA:22,801:intergenic (+43/‑92)	PA14_RS00100	PA14_00210		lysin domain-containing protein	0	0	0.09	0	0	0	0	0	0	0	0	0	0	0	0.09	0	0	0	0	0	0	0	0	0	0	0	0
PA14_RS07945 →:1,711,057:S369T (AGC→ACC) ‡	PA14_RS07945	PA14_19850		transcriptional regulator	0	0	0.09	0	0	0	0	0	0	0	0	0	0	0	0.09	0	0	0	0	0	0	0	0	0	0	0	0
PA14_RS08305 → / → PA14_RS08310:1,780,730:intergenic (+112/‑72)	PA14_RS08305	PA14_20670		glutamine synthetase	0	0	0.09	0	0	0	0	0	0	0	0	0	0	0	0.09	0	0	0	0	0	0	0	0	0	0	0	0
PA14_RS10935 →:2,351,398:A146G (GCG→GGG)	PA14_RS10935	PA14_27050		Slt family transglycosylase	0	0	0.09	0	0	0	0	0	0	0	0	0	0	0	0.09	0	0	0	0	0	0	0	0	0	0	0	0
PA14_RS11150 →:2,392,693:L107V (CTG→GTG)	PA14_RS11150	PA14_27560		hypothetical protein	0	0	0.09	0.03	0.12	0	-0.11	-0.03	0	0.09	0	0	0.09	0	0.09	0.07	0	0	0.1	0.12	0	0.11	0.12	0	0	0.09	0
PA14_RS15360 →:3,368,196:R142S (AGG→AGC) ‡	PA14_RS15360	PA14_37770		hydrolase	0	0	0.09	0	0	0	0	0	0	0	0	0	0	0	0.09	0	0	0	0	0	0	0	0	0	0	0	0
PA14_RS19765 ←:4,328,824:P486P (CCG→CCC)	PA14_RS19765	PA14_48680		hypothetical protein	0	0	0.09	0	0	0	-0.1	-0.09	0	0	0	0	0	0	0.09	0	0	0	0	0	0	0.1	0.09	0	0	0	0
PA14_RS23115 ←:5,053,039:N205K (AAT→AAA)	PA14_RS23115	PA14_56720		oxidoreductase	0	0	0.09	0	0	0	0	0	0	0	0	0	0	0	0.09	0	0	0	0	0	0	0	0	0	0	0	0
PA14_RS24720 ← / ← PA14_RS24725:5,394,322:intergenic (‑215/+42)	PA14_RS24720	PA14_60520		hypothetical protein	0	0	0.09	0	0	0	0	0	0	0	0	0	0	0	0.09	0	0	0	0	0	0	0	0	0	0	0	0
PA14_RS25815 →:5,635,214:S31R (AGC→AGG)	PA14_RS25815	PA14_63130		hypothetical protein	0	0	0.09	0	0	0	0	0	-0.08	0	0	0	0	0	0.09	0	0	0	0	0	0	0	0	0.08	0	0	0
PA14_RS27670 ←:6,059,712:A21P (GCC→CCC)	PA14_RS27670	PA14_67850		ABC-type amino acid transport protein, periplasmic component	0	0	0.09	0	0	0	0	-0.06	-0.07	0	0	0	0	0	0.09	0	0	0	0	0	0	0	0.06	0.07	0	0	0
PA14_RS00065 → / ← PA14_RS00070:16,306:intergenic (+32/+30)	PA14_RS00065	PA14_00140		hypothetical protein	0	0	0.08	0	0.09	0	-0.1	0	0	0	0	0	0	0	0.08	0	0	0	0	0.09	0	0.1	0	0	0	0	0
PA14_RS03400 ←:723,134:A338A (GCA→GCC)	PA14_RS03400	PA14_08450		hypothetical protein	0	0	0.08	0	0	0	0	0	0	0	0	0	0	0	0.08	0	0	0	0	0	0	0	0	0	0	0	0
PA14_RS06825 → / ← PA14_RS06830:1,457,935:intergenic (+19/+32)	PA14_RS06825	PA14_17010		Na(+)/H(+) exchanger protein	0	0	0.08	0	0	0	0	0	0	0.08	0	0	0.08	0	0.08	0	0	0	0	0	0	0	0	0	0	0	0
PA14_RS07945 →:1,711,056:S369R (AGC→CGC) ‡	PA14_RS07945	PA14_19850		transcriptional regulator	0	0	0.08	0	0	0	0	0	0	0	0	0	0	0	0.08	0	0	0	0	0	0	0	0	0	0	0	0
PA14_RS07990 → / → PA14_RS07995:1,719,763:intergenic (+17/‑103)	PA14_RS07990	PA14_19960		hypothetical protein	0	0	0.08	-0.08	-0.09	0	0	-0.08	-0.07	0	0	0	0	0	0.08	0.08	0.09	0	0	0	0	0	0.08	0.07	0	0	0
PA14_RS08445 ←:1,809,595:V9D (GTC→GAC)	PA14_RS08445	PA14_21010		FAD-dependent monooxygenase	0	0	0.08	0	0	0	0	0	0	0	0	0	0	0	0.08	0	0	0	0	0	0	0	0	0	0	0	0
PA14_RS18480 ←:4,049,551:L23V (CTG→GTG)	PA14_RS18480	PA14_45480		hypothetical protein	0	0	0.08	0	0	0	0	0	0	0	0	0	0	0	0.08	0	0	0	0	0	0	0	0	0	0	0	0
PA14_RS19140 ←:4,195,238:E232A (GAG→GCG)	PA14_RS19140	PA14_47090		protease	0	0	0.08	0	-0.09	0	0	0	0.1	0	0	0	0	0	0.08	0	0.09	0	0	0	0	0	0	0	0	0	0.1
PA14_RS21735 ← / ← PA14_RS21740:4,735,384:intergenic (‑125/+66)	PA14_RS21735	PA14_53390		hypothetical protein	0	0	0.08	0	0	0	0	0	0	0	0	0	0	0	0.08	0	0	0	0	0	0	0	0	0	0	0	0
PA14_RS26510 ← / ← PA14_RS26515:5,779,319:intergenic (‑53/+18)	PA14_RS26510	PA14_64850		ornithine cyclodeaminase	0	0	0.08	0	0	0.12	0	0	0	0	0	0	0	0	0.08	0	0	0	0	0	0.12	0	0	0	0	0	0
PA14_RS28580 →:6,257,148:R28G (CGG→GGG)	PA14_RS28580	PA14_70160		omega amino acid--pyruvate transaminase	0	0	0.08	0	0	0	0	0	0	0	0	0	0	0	0.08	0	0	0	0	0	0	0	0	0	0	0	0
PA14_RS13030 ←:2,769,453:S305C (AGT→TGT)	PA14_RS13030	PA14_31840		hypothetical protein	0	-0.07	0.08	-0.09	0	0.09	-0.07	0	-0.07	0	0.07	0	0	0	0.08	0.09	0	0	0	0	0.09	0.07	0	0.07	0	0	0
PA14_RS29480 ←:6,451,119:A615G (GCG→GGG)	PA14_RS29480	PA14_72420		diguanylate cyclase	0	-0.07	0.08	0	0	0	0	0	-0.07	0	0.07	0	0	0	0.08	0	0	0	0	0	0	0	0	0.07	0	0	0
rrf ← / ← PA14_RS25360:5,536,163:intergenic (‑12/+118)	PA14_RS25360	PA14_62060		23S ribosomal RNA	0	-0.01	0.07	-0.01	0.04	0.06	0.01	-0.02	0	0.53	0.55	0.48	0.53	0.54	0.55	0.52	0.52	0.45	0.51	0.56	0.51	0.52	0.54	0.56	0.53	0.52	0.56
PA14_RS26615 →:5,804,252:L588H (CTC→CAC)	PA14_RS26615	PA14_65090		hypothetical protein	0	0.07	0.07	0	0	0	0	0	0	0	0	0	0	0.07	0.07	0	0	0	0	0	0	0	0	0	0	0	0
dusA ← / → PA14_RS11350:2,421,788:intergenic (‑37/‑266)	PA14_RS11350	PA14_27990		sialidase	0	0	0.07	0	0.09	0.09	0	0	0.09	0	0	0	0	0	0.07	0	0	0	0	0.09	0.09	0	0	0	0	0	0.09
PA14_RS01090 → / → PA14_RS01095:241,821:intergenic (+57/‑107)	PA14_RS01090	PA14_02700		aminotransferase	0	0	0.07	0	0	0	0	0	0	0	0	0	0	0	0.07	0	0	0	0	0	0	0	0	0	0	0	0
PA14_RS03315 →:706,278:M231L (ATG→TTG)	PA14_RS03315	PA14_08260		minor tail protein L	0	0	0.07	0	0	0	0	0	0	0	0	0	0	0	0.07	0	0	0	0	0	0	0	0	0	0	0	0
PA14_RS08050 →:1,732,529:A167P (GCG→CCG)	PA14_RS08050	PA14_20100		hypothetical protein	0	0	0.07	0	0	0	0	-0.08	0	0	0	0	0	0	0.07	0	0	0	0	0	0	0	0.08	0	0	0	0
PA14_RS08245 →:1,766,407:Y63* (TAT→TAA)	PA14_RS08245	PA14_20530		hypothetical protein	0	0	0.07	0	0	0	0	0	0	0	0	0	0	0	0.07	0	0	0	0	0	0	0	0	0	0	0	0
PA14_RS08450 ←:1,812,205:S1491R (AGC→CGC)	PA14_RS08450	PA14_21020		non-ribosomal peptide synthetase	0	0	0.07	0	0	0	0	0	0	0	0	0	0	0	0.07	0	0	0	0	0	0	0	0	0	0	0	0
PA14_RS13265 →:2,824,882:S30T (TCC→ACC)	PA14_RS13265	PA14_32520		hypothetical protein	0	0	0.07	0	0	0	0	0	0	0	0	0	0	0	0.07	0	0	0	0	0	0	0	0	0	0	0	0
PA14_RS14815 ←:3,242,995:S23R (AGC→CGC) ‡	PA14_RS14815	PA14_36400		hypothetical protein	0	0	0.07	-0.13	0	0	0	0.02	0.05	0	0	0.12	0	0	0.19	0.13	0	0	0	0	0	0	0.12	0.14	0	0.14	0.19
PA14_RS24720 ← / ← PA14_RS24725:5,394,324:intergenic (‑217/+40)	PA14_RS24720	PA14_60520		hypothetical protein	0	0	0.07	0	0	0	0	0	0	0	0	0	0	0	0.07	0	0	0	0	0	0	0	0	0	0	0	0
PA14_RS26855 ←:5,857,045:Q224L (CAG→CTG)	PA14_RS26855	PA14_65760		NAD(P)H quinone oxidoreductase	0	0	0.07	0.11	-0.14	0	0	0.1	0	0	0	0	0	0	0.07	0	0.14	0	0.11	0	0	0	0	0	0	0.1	0
piv ← / ← PA14_RS04000:851,479:intergenic (‑99/+434)	PA14_RS04000	PA14_09910		transcriptional regulator	0	0	0.07	0	0	0	0	0	0	0	0	0	0	0	0.07	0	0	0	0	0	0	0	0	0	0	0	0
PA14_RS15380 ←:3,372,320:R340P (CGC→CCC)	PA14_RS15380	PA14_37820		hypothetical protein	0	-0.16	0.07	0.1	0	0	-0.17	-0.03	-0.12	0	0.16	0.15	0	0	0.22	0	0	0	0.1	0	0	0.17	0.15	0.12	0	0.12	0
PA14_RS05000 ← / ← hemL:1,066,293:intergenic (‑191/+18)	PA14_RS05000	PA14_12370		hypothetical protein	0	0.04	0.06	-0.03	0.19	0	-0.04	0.02	-0.03	0.22	0.19	0.19	0.22	0.23	0.25	0.19	0	0.18	0.16	0.19	0.18	0.24	0.17	0.21	0.2	0.19	0.18
PA14_RS00220 →:55,033:I42N (ATC→AAC)	PA14_RS00220	PA14_00530		hypothetical protein	0	0	0.06	0.07	0.08	0.07	0	0	0.04	0	0	0	0	0	0.06	0	0	0	0.07	0.08	0.07	0	0	0.05	0	0	0.09
PA14_RS00625 ←:140,716:R156G (CGC→GGC)	PA14_RS00625	PA14_01500		transcriptional regulator	0	0	0.06	0	0	0	0	0	0	0	0	0	0	0	0.06	0	0	0	0	0	0	0	0	0	0	0	0
PA14_RS01770 →:388,522:D37E (GAT→GAG)	PA14_RS01770	PA14_04340		hypothetical protein	0	0	0.06	0	0	0.01	0	0	0	0	0	0	0	0	0.06	0	0	0.05	0	0	0.06	0	0	0	0	0	0
PA14_RS02480 ←:545,482:V277G (GTC→GGC)	PA14_RS02480	PA14_06170		transmembrane sensor	0	0	0.06	0	0	0	0.05	0	-0.06	0	0	0	0	0	0.06	0	0	0	0	0	0	0	0	0.06	0.05	0	0
PA14_RS05365 →:1,146,603:L116V (CTG→GTG) ‡	PA14_RS05365	PA14_13340		extracellular nuclease	0	0	0.06	0.11	0	0	0	-0.11	0.01	0	0	0.12	0	0	0.18	0	0	0	0.11	0	0	0	0.11	0.09	0	0	0.1
PA14_RS05365 →:1,146,660:G135R (GGC→CGC)	PA14_RS05365	PA14_13340		extracellular nuclease	0	0	0.06	0	0	0	0	0	0	0	0	0	0	0	0.06	0	0	0	0	0	0	0	0	0	0	0	0
PA14_RS06025 →:1,283,289:L154R (CTG→CGG)	PA14_RS06025	PA14_15130		hypothetical protein	0	0	0.06	0.06	0	-0.08	0	0	0	0	0	0	0	0	0.06	0	0	0.08	0.06	0	0	0	0	0	0	0	0
PA14_RS08385 →:1,796,489:A341G (GCG→GGG)	PA14_RS08385	PA14_20860		Tfp pilus assembly protein FimV	0	0	0.06	0	0	0	0	0	0	0	0	0	0	0	0.06	0	0	0	0	0	0	0	0	0	0	0	0
PA14_RS15265 ←:3,339,725:Q77L (CAG→CTG)	PA14_RS15265	PA14_37520		hypothetical protein	0	0	0.06	0	0	0	0	0	0	0	0	0	0	0	0.06	0	0	0	0	0	0	0	0	0	0	0	0
PA14_RS18380 ←:4,033,812:R86R (CGC→CGG)	PA14_RS18380	PA14_45240		amino acid permease	0	0	0.06	0	0	0	0	0	0	0	0	0	0	0	0.06	0	0	0	0	0	0	0	0	0	0	0	0
PA14_RS18800 ←:4,120,732:R793H (CGT→CAT)	PA14_RS18800	PA14_46320		pyruvate carboxylase	0	0	0.06	0	0	0	0	0	0	0	0	0	0	0	0.06	0	0	0	0	0	0	0	0	0	0	0	0
PA14_RS19365 →:4,240,779:L85V (CTG→GTG)	PA14_RS19365	PA14_47640		major facilitator transporter	0	0	0.06	0	0	0	0	0	0	0	0	0	0	0	0.06	0	0	0	0	0	0	0	0	0	0	0	0
PA14_RS20625 ←:4,512,202:A229G (GCG→GGG)	PA14_RS20625	PA14_50790		hypothetical protein	0	0	0.06	0	0	0	0	0	0	0	0	0	0	0	0.06	0	0	0	0	0	0	0	0	0	0	0	0
PA14_RS20645 ←:4,516,178:Q693H (CAA→CAC)	PA14_RS20645	PA14_50830		hypothetical protein	0	0	0.06	0	0	0	-0.05	0	0	0	0	0	0	0	0.06	0	0	0	0	0	0	0.05	0	0	0	0	0
PA14_RS21480 ←:4,676,079:M344R (ATG→AGG)	PA14_RS21480	PA14_52760		hypothetical protein	0	0	0.06	0	0	0	0	0	0	0	0	0	0	0	0.06	0	0	0	0	0	0	0	0	0	0	0	0
PA14_RS23595 ← / → PA14_RS23600:5,152,736:intergenic (‑254/‑160)	PA14_RS23595	PA14_57880		ABC transporter ATP-binding protein	0	0	0.06	0	0	0	0	0	0	0	0	0	0	0	0.06	0	0	0	0	0	0	0	0	0	0	0	0
PA14_RS25000 ←:5,459,471:I1795N (ATC→AAC)	PA14_RS25000	PA14_61200		hypothetical protein	0	0	0.06	0	0	-0.05	0	0	0	0	0	0	0	0	0.06	0	0	0.05	0	0	0	0	0	0	0	0	0
PA14_RS26855 ←:5,857,037:A227P (GCG→CCG)	PA14_RS26855	PA14_65760		NAD(P)H quinone oxidoreductase	0	0	0.06	0	0	0	0	0	0	0	0	0	0	0	0.06	0	0	0	0	0	0	0	0	0	0	0	0
PA14_RS27630 ← / → PA14_RS27635:6,050,034:intergenic (‑62/‑263)	PA14_RS27630	PA14_67750		rhodanese-like domain-containing protein	0	0	0.06	0	0	0	0	0	0	0	0	0	0	0	0.06	0	0	0	0	0	0	0	0	0	0	0	0
PA14_RS29080 ← / ← gbcA:6,358,291:intergenic (‑266/+19)	PA14_RS29080	PA14_71390		hypothetical protein	0	0	0.06	0	0	0	0	0	0	0	0	0	0	0	0.06	0	0	0	0	0	0	0	0	0	0	0	0
PA14_RS29255 ←:6,403,825:V3L (GTC→CTC)	PA14_RS29255	PA14_71850		hypothetical protein	0	0	0.06	0	0	0	0	0	0	0	0	0	0	0	0.06	0	0	0	0	0	0	0	0	0	0	0	0
PA14_RS30290 ← / ← PA14_RS09015:1,938,847:intergenic (‑47/+867)	PA14_RS30290	PA14_22260		hypothetical protein	0	0	0.06	0	0	0	0	0	0	0	0	0	0	0	0.06	0	0	0	0	0	0	0	0	0	0	0	0
PA14_RS01695 →:372,928:E205V (GAG→GTG)	PA14_RS01695	PA14_04150		hypothetical protein	0	0	0.05	0	-0.07	0.01	0	0	0.01	0	0	0	0	0	0.05	0	0.07	0.05	0	0	0.06	0	0	0.05	0	0	0.06
PA14_RS02885 → / → PA14_RS02890:622,814:intergenic (+122/‑38)	PA14_RS02885	PA14_07200		hypothetical protein	0	0	0.05	0	0	0.02	0.1	-0.01	0	0	0	0	0	0	0.05	0	0	0.06	0	0	0.08	0	0.08	0	0.1	0.07	0
PA14_RS03275 →:701,239:L191M (CTG→ATG)	PA14_RS03275	PA14_08160		lytic enzyme	0	0	0.05	0	0	0	0	0	0	0	0	0	0	0	0.05	0	0	0	0	0	0	0	0	0	0	0	0
PA14_RS08450 ←:1,812,140:C1512W (TGC→TGG)	PA14_RS08450	PA14_21020		non-ribosomal peptide synthetase	0	0	0.05	0.05	0	0	0	0.05	0	0	0	0	0	0	0.05	0	0	0	0.05	0	0	0	0	0	0	0.05	0
PA14_RS15480 → / ← PA14_RS15485:3,397,726:intergenic (+16/+142)	PA14_RS15480	PA14_38080		hypothetical protein	0	0	0.05	0	0	0	0	0	0	0	0	0	0	0	0.05	0	0	0	0	0	0	0	0	0	0	0	0
PA14_RS15935 →:3,494,133:L100R (CTG→CGG)	PA14_RS15935	PA14_39240		hypothetical protein	0	0	0.05	0	0	-0.01	0.06	0	0	0	0	0	0	0	0.05	0	0	0.07	0	0	0.06	0	0	0	0.06	0	0
PA14_RS21955 →:4,779,679:A301P (GCC→CCC)	PA14_RS21955	PA14_53900		helicase	0	0	0.05	0	0	0	0.06	0	0	0	0	0	0	0	0.05	0	0	0	0	0	0	0	0	0	0.06	0	0
PA14_RS25000 ←:5,461,792:D1021D (GAT→GAC)	PA14_RS25000	PA14_61200		hypothetical protein	0	0	0.05	0	0	0	0	0	0	0	0	0	0	0	0.05	0	0	0	0	0	0	0	0	0	0	0	0
PA14_RS25155 ← / ← hemH:5,494,385:intergenic (‑185/+95)	PA14_RS25155	PA14_61560		MFS transporter	0	0	0.05	-0.07	0	0	0	0	-0.08	0	0	0	0	0	0.05	0.07	0	0	0	0	0	0	0	0.08	0	0	0
PA14_RS26545 →:5,786,408:R105P (CGG→CCG)	PA14_RS26545	PA14_64920		methyl-accepting chemotaxis protein	0	0	0.05	0	0	0	0	0	0	0	0	0	0	0	0.05	0	0	0	0	0	0	0	0	0	0	0	0
PA14_RS27245 →:5,963,266:M41L (ATG→TTG)	PA14_RS27245	PA14_66760		hypothetical protein	0	0	0.05	0	0	0	0	0	0	0	0	0	0	0	0.05	0	0	0	0	0	0	0	0	0	0	0	0
PA14_RS06025 →:1,283,280:L151R (CTG→CGG)	PA14_RS06025	PA14_15130		hypothetical protein	0	0	0.05	0	-0.11	0	0	0	0	0	0	0.1	0	0	0.15	0	0.11	0	0	0	0	0	0	0	0	0	0
PA14_RS25505 →:5,567,485:A129P (GCC→CCC)	PA14_RS25505	PA14_62410		hypothetical protein	0	-0.12	0.04	0.12	0	-0.1	0	-0.09	0.01	0	0.12	0.12	0	0	0.16	0	0	0.1	0.12	0	0	0	0.09	0.08	0	0	0.09
PA14_RS21735 ← / ← PA14_RS21740:4,735,368:intergenic (‑109/+82)	PA14_RS21735	PA14_53390		hypothetical protein	0	0.04	0.04	0.05	0.02	0.11	0.01	0.08	-0.09	0	0.07	0.07	0	0.11	0.11	0.06	0.08	0	0.11	0.1	0.11	0.07	0	0.09	0.08	0.08	0
PA14_RS00515 →:120,680:R168P (CGC→CCC)	PA14_RS00515	PA14_01230		hypothetical protein	0	0	0.04	0.12	-0.11	0	0	0	0	0	0	0.08	0	0	0.12	0	0.11	0	0.12	0	0	0	0	0	0	0	0
PA14_RS25000 ←:5,460,283:N1524N (AAT→AAC)	PA14_RS25000	PA14_61200		hypothetical protein	0	0.02	0.04	-0.01	0.04	0	0	-0.02	0	0.19	0.19	0.17	0.19	0.21	0.21	0.17	0.21	0.17	0.16	0.25	0.17	0.18	0.18	0.17	0.18	0.16	0.17
PA14_RS07945 →:1,711,061:T370T (ACG→ACC)	PA14_RS07945	PA14_19850		transcriptional regulator	0	-0.12	0.03	0.1	-0.12	0.1	-0.09	-0.09	-0.1	0	0.12	0.07	0	0	0.1	0	0.12	0	0.1	0	0.1	0.09	0.09	0.1	0	0	0
PA14_RS29035 →:6,353,259:R74P (CGC→CCC)	PA14_RS29035	PA14_71300		electron transfer flavoprotein alpha subunit	0	-0.02	0.02	-0.01	-0.19	0.01	0.02	-0.05	-0.01	0.15	0.23	0.24	0.15	0.21	0.26	0.17	0.19	0.19	0.16	0	0.2	0.25	0.23	0.23	0.27	0.18	0.22
PA14_RS29430 →:6,441,726:F342L (TTC→TTG)	PA14_RS29430	PA14_72300		hypothetical protein	0	-0.07	0.02	0	0	0.11	0	0	0	0	0.07	0.09	0	0	0.11	0	0	0	0	0	0.11	0	0	0	0	0	0
PA14_RS07945 →:1,711,048:L366R (CTG→CGG)	PA14_RS07945	PA14_19850		transcriptional regulator	0	-0.1	0.02	-0.08	0	0.03	0.03	-0.11	0.02	0.07	0.1	0.09	0.07	0	0.11	0.08	0.09	0.09	0	0.09	0.12	0.07	0.11	0.08	0.1	0	0.1
PA14_RS28740 → / ← PA14_RS28745:6,289,515:intergenic (+46/+26)	PA14_RS28740	PA14_70580		hypothetical protein	0	-0.1	0.02	0.03	-0.01	-0.04	0.03	0	0.04	0.09	0.1	0.1	0.09	0	0.12	0.08	0.11	0.14	0.11	0.1	0.1	0.1	0.1	0.08	0.13	0.1	0.12
PA14_RS07305 →:1,561,059:D219A (GAC→GCC)	PA14_RS07305	PA14_18200		LysR family transcriptional regulator	0	0.07	0.01	0.04	-0.13	-0.13	0.07	0.07	0	0	0.13	0.15	0	0.2	0.16	0.18	0.13	0.13	0.22	0	0	0.15	0.14	0.18	0.22	0.21	0.18
PA14_RS26830 ←:5,851,378:R42P (CGC→CCC)	PA14_RS26830	PA14_65700		hypothetical protein	0	0.02	0.01	0.04	-0.02	-0.2	-0.01	0.02	-0.2	0.19	0.19	0.18	0.19	0.21	0.19	0.15	0.17	0.2	0.19	0.15	0	0.21	0.12	0.2	0.2	0.14	0
PA14_RS00730 ←:162,432:N277T (AAC→ACC)	PA14_RS00730	PA14_01770		nucleoside-binding outer membrane protein	0	0	0.01	0	0	0	0.07	0	-0.05	0	0	0.06	0	0	0.07	0	0	0	0	0	0	0	0	0.05	0.07	0	0
PA14_RS08750 → / → PA14_RS08755:1,888,099:intergenic (+45/‑22)	PA14_RS08750	PA14_21710		hypothetical protein	0	0	0.01	0	-0.1	0	0	0	0	0	0	0.06	0	0	0.07	0	0.1	0	0	0	0	0	0	0	0	0	0
PA14_RS29350 → / → PA14_RS29355:6,424,880:intergenic (+21/‑104)	PA14_RS29350	PA14_72070		hypothetical protein	0	-0.06	0.01	-0.07	0	-0.05	-0.06	0	-0.08	0	0.06	0.06	0	0	0.07	0.07	0	0.05	0	0	0	0.06	0.06	0.08	0	0.06	0
PA14_RS29350 → / → PA14_RS29355:6,424,891:intergenic (+32/‑93)	PA14_RS29350	PA14_72070		hypothetical protein	0	-0.11	0.01	-0.13	-0.1	-0.01	0	0.12	0	0.12	0.11	0.12	0.12	0	0.13	0.13	0.1	0.12	0	0	0.11	0.13	0	0	0.13	0.12	0
PA14_RS14080 ← / ← PA14_RS14085:3,073,636:intergenic (‑191/+27)	PA14_RS14080	PA14_34580		hypothetical protein	0	-0.03	0.01	0.11	0	0	0	-0.11	0.01	0	0.12	0.08	0	0.09	0.09	0	0	0	0.11	0	0	0.11	0.11	0.13	0.11	0	0.14
PA14_RS14815 ←:3,242,994:S23T (AGC→ACC) ‡	PA14_RS14815	PA14_36400		hypothetical protein	0	0	0.01	-0.29	0	0	0	0.06	0.05	0	0	0.23	0	0	0.24	0.29	0	0	0	0	0	0	0.2	0.28	0	0.26	0.33
PA14_RS13175 →:2,807,687:Q277P (CAG→CCG) ‡	PA14_RS13175	PA14_32300		kinase	0	0.37	0	-0.26	0	-0.28	-0.29	0	-0.22	0	0	0	0	0.37	0	0.26	0	0.28	0	0	0	0.29	0	0.22	0	0	0
PA14_RS02360 →:517,508:I37F (ATC→TTC)	PA14_RS02360	PA14_05850		LysR family transcriptional regulator	0	0.3	0	0	0	0	0	0	0	0	0	0	0	0.3	0	0	0	0	0	0	0	0	0	0	0	0	0
PA14_RS05740 ← / ← PA14_RS05745:1,226,047:intergenic (‑101/+18)	PA14_RS05740	PA14_14360		sodium:sulfate symporter	0	0.3	0	-0.3	0	0.21	0	0	0	0	0	0	0	0.3	0	0.3	0	0	0	0	0.21	0	0	0	0	0	0
PA14_RS20570 ←:4,501,399:L201R (CTG→CGG) ‡	PA14_RS20570	PA14_50670		hypothetical protein	0	0.25	0	-0.01	-0.25	0	-0.06	0.37	-0.36	0	0	0	0	0.25	0	0.29	0.25	0	0.28	0	0	0.36	0	0.36	0.3	0.37	0
PA14_RS20570 ←:4,501,400:L201V (CTG→GTG) ‡	PA14_RS20570	PA14_50670		hypothetical protein	0	0.23	0	-0.02	-0.21	0	-0.02	0.28	-0.24	0	0	0	0	0.23	0	0.27	0.21	0	0.25	0	0	0.25	0	0.24	0.23	0.28	0
PA14_RS12015 ←:2,554,756:Q24P (CAG→CCG)	PA14_RS12015	PA14_29460		quinone oxidoreductase	0	0.2	0	0	0	0	-0.15	0	0.21	0	0	0	0	0.2	0	0	0	0	0	0	0	0.15	0	0	0	0	0.21
PA14_RS13705 →:2,966,679:P3355P (CCG→CCC)	PA14_RS13705	PA14_33610		peptide synthase	0	0.2	0	0	0	0	0	0	-0.14	0	0	0	0	0.2	0	0	0	0	0	0	0	0	0	0.14	0	0	0
PA14_RS13175 →:2,807,688:Q277H (CAG→CAC) ‡	PA14_RS13175	PA14_32300		kinase	0	0.19	0	-0.18	0	-0.19	-0.16	0	-0.22	0	0	0	0	0.19	0	0.18	0	0.19	0	0	0	0.16	0	0.22	0	0	0
PA14_RS06825 → / ← PA14_RS06830:1,457,931:intergenic (+15/+36)	PA14_RS06825	PA14_17010		Na(+)/H(+) exchanger protein	0	0.17	0	0	0	0.15	-0.14	0	0	0	0	0	0	0.17	0	0	0	0	0	0	0.15	0.14	0	0	0	0	0
PA14_RS13705 →:2,966,681:I3356N (ATC→AAC)	PA14_RS13705	PA14_33610		peptide synthase	0	0.17	0	0	0	0	0.22	0	0	0	0	0	0	0.17	0	0	0	0	0	0	0	0	0	0	0.22	0	0
PA14_RS08345 → / → PA14_RS08350:1,787,253:intergenic (+14/‑301)	PA14_RS08345	PA14_20760		chemotaxis protein methyltransferase	0	0.16	0	0.17	0	0.04	0	0	0	0	0	0	0	0.16	0	0	0	0.13	0.17	0	0.17	0	0	0	0	0	0
PA14_RS13495 →:2,898,657:L9V (CTG→GTG)	PA14_RS13495	PA14_33110		hypothetical protein	0	0.16	0	0.01	0	0.09	-0.23	0.02	0	0	0	0	0	0.16	0	0.13	0	0.12	0.14	0	0.21	0.23	0.14	0	0	0.16	0
PA14_RS28245 ←:6,180,621:A631P (GCC→CCC)	PA14_RS28245	PA14_69300		hypothetical protein	0	0.16	0	0	0	0	0	0	0	0	0	0	0	0.16	0	0	0	0	0	0	0	0	0	0	0	0	0
glpK → / → PA14_RS07235:1,547,512:intergenic (+25/‑171)	PA14_RS07235	PA14_18020		PhzF family phenazine biosynthesis protein	0	0.15	0	-0.14	-0.05	0	-0.12	0	0	0	0	0	0	0.15	0	0.14	0.15	0	0	0.1	0	0.12	0	0	0	0	0
PA14_RS08345 → / → PA14_RS08350:1,787,266:intergenic (+27/‑288)	PA14_RS08345	PA14_20760		chemotaxis protein methyltransferase	0	0.14	0	0	0	0	0	0	0	0	0	0	0	0.14	0	0	0	0	0	0	0	0	0	0	0	0	0
PA14_RS09385 ← / ← PA14_RS09390:2,009,639:intergenic (‑132/+27)	PA14_RS09385	PA14_23190		transcriptional regulator	0	0.14	0	0	0	0	0	0	0	0	0	0	0	0.14	0	0	0	0	0	0	0	0	0	0	0	0	0
PA14_RS29555 →:6,467,790:Q80L (CAG→CTG)	PA14_RS29555	PA14_72600		lipoprotein	0	0.14	0	0	0	0	0	0	0	0	0	0	0	0.14	0	0	0	0	0	0	0	0	0	0	0	0	0
PA14_RS00845 → / → PA14_RS00850:188,888:intergenic (+72/‑170)	PA14_RS00845	PA14_02060		hypothetical protein	0	0.13	0	0	0	0	0	0	0	0	0	0	0	0.13	0	0	0	0	0	0	0	0	0	0	0	0	0
PA14_RS04375 ← / ← PA14_RS04380:940,493:intergenic (‑62/+93)	PA14_RS04375	PA14_10850		dehydrogenase	0	0.13	0	0	0	0	0	0	0	0	0	0	0	0.13	0	0	0	0	0	0	0	0	0	0	0	0	0
PA14_RS12705 ← / ← PA14_RS12710:2,703,396:intergenic (‑241/+208)	PA14_RS12705	PA14_31070		hypothetical protein	0	0.13	0	0	0.13	0	-0.12	-0.1	-0.14	0	0	0	0	0.13	0	0	0	0	0	0.13	0	0.12	0.1	0.14	0	0	0
PA14_RS11955 →:2,536,441:S213A (TCG→GCG)	PA14_RS11955	PA14_29320		NADH dehydrogenase, FAD-containing subunit	0	0.12	0	0	-0.13	0	0	0	0	0	0	0	0	0.12	0	0	0.13	0	0	0	0	0	0	0	0	0	0
PA14_RS26505 ←:5,777,619:S133R (AGC→CGC)	PA14_RS26505	PA14_64840		short-chain dehydrogenase	0	0.12	0	0	0	0	0	0	0	0	0	0	0	0.12	0	0	0	0	0	0	0	0	0	0	0	0	0
PA14_RS29035 →:6,353,253:A72G (GCG→GGG)	PA14_RS29035	PA14_71300		electron transfer flavoprotein alpha subunit	0	0.12	0	-0.17	0.05	-0.13	0.11	0	-0.07	0	0	0	0	0.12	0	0.17	0.09	0.13	0	0.14	0	0	0	0.07	0.11	0	0
hydA ← / → PA14_RS02340:511,336:intergenic (‑330/‑286)	PA14_RS02340	PA14_05790		transporter	0	0.11	0	0	0	0	0	0	0	0	0	0	0	0.11	0	0	0	0	0	0	0	0	0	0	0	0	0
PA14_RS04810 ←:1,029,410:T572P (ACC→CCC)	PA14_RS04810	PA14_11900		hypothetical protein	0	0.11	0	0	0	0	0	0	0	0	0	0	0	0.11	0	0	0	0	0	0	0	0	0	0	0	0	0
PA14_RS07925 ←:1,704,926:R192R (AGG→CGG)	PA14_RS07925	PA14_19770		hypothetical protein	0	0.11	0	-0.17	0	0.05	0.04	0.04	0.08	0.2	0.18	0.2	0.2	0.29	0.2	0.4	0.17	0.19	0.23	0.17	0.24	0.24	0.2	0.2	0.28	0.24	0.28
PA14_RS14080 ← / ← PA14_RS14085:3,073,650:intergenic (‑205/+13)	PA14_RS14080	PA14_34580		hypothetical protein	0	0.11	0	0	0	0	0	0	0.12	0	0	0	0	0.11	0	0	0	0	0	0	0	0	0	0	0	0	0.12
PA14_RS19555 ←:4,285,103:V26D (GTC→GAC)	PA14_RS19555	PA14_48140		hypothetical protein	0	0.11	0	-0.14	0	0.11	-0.1	0	0	0	0	0	0	0.11	0	0.14	0	0	0	0	0.11	0.1	0	0	0	0	0
PA14_RS00515 → / → PA14_RS00520:121,686:intergenic (+276/‑100)	PA14_RS00515	PA14_01230		hypothetical protein	0	0.1	0	0	0	0	0	0	0	0	0	0	0	0.1	0	0	0	0	0	0	0	0	0	0	0	0	0
PA14_RS06270 ←:1,330,811:G117C (GGC→TGC)	PA14_RS06270	PA14_15650		hypothetical protein	0	0.1	0	0	0	0	0	0	0	0	0	0	0	0.1	0	0	0	0	0	0	0	0	0	0	0	0	0
PA14_RS11890 → / ← PA14_RS11895:2,524,161:intergenic (+94/+188)	PA14_RS11890	PA14_29180		AraC family transcriptional regulator	0	0.1	0	0	0	0	0	0	0	0	0	0	0	0.1	0	0	0	0	0	0	0	0	0	0	0	0	0
PA14_RS21870 →:4,763,302:Q256H (CAG→CAC)	PA14_RS21870	PA14_53720		transcriptional regulator	0	0.1	0	0	0	0	0	0	0	0	0	0	0	0.1	0	0	0	0	0	0	0	0	0	0	0	0	0
PA14_RS26335 →:5,742,717:D369A (GAC→GCC)	PA14_RS26335	PA14_64450		heat-shock protein	0	0.1	0	0	0	0	0.1	0	-0.1	0	0	0	0	0.1	0	0	0	0	0	0	0	0	0	0.1	0.1	0	0
ada ← / → PA14_RS15150:3,313,824:intergenic (‑80/‑112)	PA14_RS15150	PA14_37200		hypothetical protein	0	0.09	0	0	0	0	0	0	0	0	0	0	0	0.09	0	0	0	0	0	0	0	0	0	0	0	0	0
PA14_RS02890 →:622,854:M1M (ATG→ATT) †	PA14_RS02890	PA14_07210		hypothetical protein	0	0.09	0	0	0	0	-0.06	-0.07	-0.06	0	0	0	0	0.09	0	0	0	0	0	0	0	0.06	0.07	0.06	0	0	0
PA14_RS04960 →:1,058,450:Q83H (CAG→CAC)	PA14_RS04960	PA14_12260		hypothetical protein	0	0.09	0	0	0	0	0	0	0	0	0	0	0	0.09	0	0	0	0	0	0	0	0	0	0	0	0	0
PA14_RS09775 ←:2,094,011:A49A (GCG→GCC)	PA14_RS09775	PA14_24140		AraC family transcriptional regulator	0	0.09	0	0	0	0	0	0	0	0	0	0	0	0.09	0	0	0	0	0	0	0	0	0	0	0	0	0
PA14_RS14525 ← / → PA14_RS14530:3,177,226:intergenic (‑6/‑281)	PA14_RS14525	PA14_35730		hypothetical protein	0	0.09	0	0	0	0	0	0	0	0	0	0	0	0.09	0	0	0	0	0	0	0	0	0	0	0	0	0
PA14_RS14745 ←:3,229,455:M250R (ATG→AGG)	PA14_RS14745	PA14_36260		signal transduction protein	0	0.09	0	0.09	0.03	0	0	0	0	0	0	0	0	0.09	0	0	0.09	0	0.09	0.12	0	0	0	0	0	0	0
PA14_RS27015 ←:5,896,904:Y291* (TAC→TAA)	PA14_RS27015	PA14_66190		hypothetical protein	0	0.09	0	0	0	0	0	0	0	0	0	0	0	0.09	0	0	0	0	0	0	0	0	0	0	0	0	0
yjiA ← / ← PA14_RS24890:5,435,971:intergenic (‑38/+22)	PA14_RS24890	PA14_60930		hypothetical protein	0	0.09	0	0	0	0	0	0	0	0	0	0	0	0.09	0	0	0	0	0	0	0	0	0	0	0	0	0
PA14_RS11190 ← / ← PA14_RS11195:2,396,785:intergenic (‑90/+61)	PA14_RS11190	PA14_27640		protein associated with synthesis and assembly of refractile inclusion bodies	0	0.08	0	-0.07	0	0.01	0	0	0	0	0	0	0	0.08	0	0.07	0	0.06	0	0	0.07	0	0	0	0	0	0
PA14_RS11815 ←:2,507,758:G160G (GGC→GGA)	PA14_RS11815	PA14_29000		hypothetical protein	0	0.08	0	0	0	0	0	0	0	0	0	0	0	0.08	0	0	0	0	0	0	0	0	0	0	0	0	0
PA14_RS16990 ← / ← PA14_RS16995:3,741,207:intergenic (‑154/+9)	PA14_RS16990	PA14_41880		universal stress protein	0	0.08	0	0	0	0	0	0	0	0	0	0	0	0.08	0	0	0	0	0	0	0	0	0	0	0	0	0
PA14_RS26485 ←:5,772,770:S437A (TCG→GCG)	PA14_RS26485	PA14_64790		MFS transporter	0	0.08	0	0.08	0	0	0	0	0	0	0	0	0	0.08	0	0	0	0	0.08	0	0	0	0	0	0	0	0
PA14_RS27015 ←:5,897,651:Q42H (CAG→CAC)	PA14_RS27015	PA14_66190		hypothetical protein	0	0.08	0	0	0	0	0	0	0	0	0	0	0	0.08	0	0	0	0	0	0	0	0	0	0	0	0	0
PA14_RS27665 ←:6,058,197:E225V (GAG→GTG)	PA14_RS27665	PA14_67840		ABC-type amino acid transporter	0	0.08	0	0	0	0	0	0	0	0	0	0	0	0.08	0	0	0	0	0	0	0	0	0	0	0	0	0
PA14_RS02930 ← / ← PA14_RS02935:630,099:intergenic (‑118/+11)	PA14_RS02930	PA14_07310		hydrolase	0	0.07	0	0	0	0	-0.06	-0.09	0	0	0	0	0	0.07	0	0	0	0	0	0	0	0.06	0.09	0	0	0	0
PA14_RS05280 → / → PA14_RS05285:1,128,149:intergenic (+10/‑51)	PA14_RS05280	PA14_13130		hypothetical protein	0	0.07	0	0	0	0.09	0	-0.07	0	0	0	0	0	0.07	0	0	0	0	0	0	0.09	0	0.07	0	0	0	0
PA14_RS07925 ← / ← PA14_RS07930:1,705,557:intergenic (‑58/+33)	PA14_RS07925	PA14_19770		hypothetical protein	0	0.07	0	0	0	0	-0.1	0	0.06	0	0	0	0	0.07	0	0	0	0	0	0	0	0.1	0	0.05	0	0	0.11
PA14_RS08865 ←:1,908,716:K260N (AAA→AAC)	PA14_RS08865	PA14_21940		hypothetical protein	0	0.07	0	0	0	0	0.06	0	0	0	0	0	0	0.07	0	0	0	0	0	0	0	0	0	0	0.06	0	0
PA14_RS27760 → / → PA14_RS27765:6,074,265:intergenic (+28/‑34)	PA14_RS27760	PA14_68070		periplasmic binding protein	0	0.07	0	0	0	0	0	0	0	0	0	0	0	0.07	0	0	0	0	0	0	0	0	0	0	0	0	0
PA14_RS00255 ← / → PA14_RS00260:63,114:intergenic (‑176/‑587)	PA14_RS00255	PA14_00620		hypothetical protein	0	0.06	0	0	0	0.07	0	-0.08	-0.05	0	0	0	0	0.06	0	0	0	0	0	0	0.07	0	0.08	0.05	0	0	0
PA14_RS00920 ←:203,663:F343V (TTC→GTC)	PA14_RS00920	PA14_02270		chemotaxis transducer	0	0.06	0	0	0	0	0	0	0	0	0	0	0	0.06	0	0	0	0	0	0	0	0	0	0	0	0	0
PA14_RS04810 ←:1,029,422:R568G (CGG→GGG)	PA14_RS04810	PA14_11900		hypothetical protein	0	0.06	0	-0.07	0	0	-0.08	0	0	0	0	0	0	0.06	0	0.07	0	0	0	0	0	0.08	0	0	0	0	0
PA14_RS06335 ← / ← PA14_RS06340:1,350,722:intergenic (‑126/+117)	PA14_RS06335	PA14_15830		GntR family transcriptional regulator	0	0.06	0	0	-0.05	0	0	0	0	0	0	0	0	0.06	0	0	0.05	0	0	0	0	0	0	0	0	0	0
PA14_RS11605 ← / → PA14_RS11610:2,461,274:intergenic (‑180/‑43)	PA14_RS11605	PA14_28530		hypothetical protein	0	0.06	0	0	0	0	0	0	0	0	0	0	0	0.06	0	0	0	0	0	0	0	0	0	0	0	0	0
PA14_RS13690 ←:2,954,268:P95P (CCC→CCG)	PA14_RS13690	PA14_33580		hypothetical protein	0	0.06	0	0	0	0	0	0	0	0	0	0	0	0.06	0	0	0	0	0	0	0	0	0	0	0	0	0
PA14_RS18120 →:3,968,541:E295V (GAG→GTG)	PA14_RS18120	PA14_44570		short-chain dehydrogenase	0	0.06	0	0	0	0	0	0	0	0	0	0	0	0.06	0	0	0	0	0	0	0	0	0	0	0	0	0
PA14_RS19125 ←:4,191,803:Q256Q (CAG→CAA)	PA14_RS19125	PA14_47060		short chain dehydrogenase	0	0.06	0	0	0	0	0	0	0	0	0	0	0	0.06	0	0	0	0	0	0	0	0	0	0	0	0	0
PA14_RS26330 ← / → PA14_RS26335:5,741,440:intergenic (‑36/‑172)	PA14_RS26330	PA14_64440		hypothetical protein	0	0.06	0	0	0	0	0	0	0	0	0	0	0	0.06	0	0	0	0	0	0	0	0	0	0	0	0	0
PA14_RS28185 ←:6,167,315:Q54K (CAA→AAA)	PA14_RS28185	PA14_69140		CDP-6-deoxy-delta-3,4-glucoseen reductase	0	0.06	0	0	0	0	0	0.09	0	0	0	0	0	0.06	0	0	0	0	0	0	0	0	0	0	0	0.09	0
PA14_RS29350 →:6,424,853:T104T (ACC→ACA)	PA14_RS29350	PA14_72070		hypothetical protein	0	0.06	0	0	0	0	0	0	0	0	0	0	0	0.06	0	0	0	0	0	0	0	0	0	0	0	0	0
PA14_RS01165 →:256,926:A171P (GCG→CCG)	PA14_RS01165	PA14_02910		IclR family transcriptional regulator	0	0.05	0	0	0	0	0.07	-0.06	0	0	0	0	0	0.05	0	0	0	0	0	0	0	0	0.06	0	0.07	0	0
PA14_RS03275 →:701,223:R185R (CGC→CGG)	PA14_RS03275	PA14_08160		lytic enzyme	0	0.05	0	0.01	0	0.09	0	0	0	0	0	0.06	0	0.05	0.06	0.05	0.07	0	0.06	0.07	0.09	0	0	0	0	0	0
PA14_RS07235 → / ← PA14_RS07245:1,548,980:intergenic (+512/+591)	PA14_RS07235	PA14_18020		PhzF family phenazine biosynthesis protein	0	0.05	0	0	0	0	0	0	-0.05	0	0	0	0	0.05	0	0	0	0	0	0	0	0	0	0.05	0	0	0
PA14_RS18305 → / → PA14_RS18310:4,015,989:intergenic (+233/‑64)	PA14_RS18305	PA14_45020		oxidoreductase	0	0.05	0	0	0	0	0	0	0	0	0	0	0	0.05	0	0	0	0	0	0	0	0	0	0	0	0	0
PA14_RS03275 →:700,857:N63N (AAT→AAC)	PA14_RS03275	PA14_08160		lytic enzyme	0	0.02	0	0	0.05	0	0	0	0	0	0.05	0	0	0.07	0	0	0	0	0	0.05	0	0	0	0	0	0	0
PA14_RS03275 →:700,863:S65S (AGC→AGT)	PA14_RS03275	PA14_08160		lytic enzyme	0	0.02	0	0	0.01	0	0	0	0	0	0.06	0	0	0.08	0	0	0.05	0	0	0.06	0	0	0	0	0	0	0
PA14_RS03275 →:700,868:Q67R (CAA→CGA) ‡	PA14_RS03275	PA14_08160		lytic enzyme	0	0.02	0	0	0.01	0	0	0	0	0	0.05	0	0	0.07	0	0	0.05	0	0	0.06	0	0	0	0	0	0	0
PA14_RS03275 →:700,869:Q67H (CAA→CAT) ‡	PA14_RS03275	PA14_08160		lytic enzyme	0	0.02	0	0	0.01	0	0	0	0	0	0.05	0	0	0.07	0	0	0.05	0	0	0.06	0	0	0	0	0	0	0
PA14_RS03275 →:700,873:L69L (TTG→CTG)	PA14_RS03275	PA14_08160		lytic enzyme	0	0.02	0	0	0	0	0	0	0	0	0.06	0	0	0.08	0	0	0.06	0	0	0.06	0	0	0	0	0	0	0
PA14_RS29770 ← / ← PA14_RS29775:6,512,659:intergenic (‑130/+34)	PA14_RS29770	PA14_73120		hypothetical protein	0	0.02	0	0	-0.09	-0.11	-0.02	0	0	0	0.11	0	0	0.13	0	0	0.09	0.11	0	0	0	0.09	0	0	0.07	0	0
PA14_RS03275 →:701,037:R123R (CGT→CGC)	PA14_RS03275	PA14_08160		lytic enzyme	0	0.01	0	0	-0.05	-0.09	0	0	0	0	0.05	0	0	0.06	0	0	0.05	0.09	0	0	0	0	0	0	0	0	0
PA14_RS03275 →:701,040:G124G (GGC→GGG)	PA14_RS03275	PA14_08160		lytic enzyme	0	0.01	0	0	-0.05	-0.09	0	0	0	0	0.05	0	0	0.06	0	0	0.05	0.09	0	0	0	0	0	0	0	0	0
PA14_RS03275 →:701,041:L125L (TTG→CTG)	PA14_RS03275	PA14_08160		lytic enzyme	0	0.01	0	0	-0.05	-0.09	0	0	0	0	0.05	0	0	0.06	0	0	0.05	0.09	0	0	0	0	0	0	0	0	0
PA14_RS03275 →:701,046:L126L (CTA→CTG)	PA14_RS03275	PA14_08160		lytic enzyme	0	0.01	0	0	-0.05	-0.08	0	0	0	0	0.05	0	0	0.06	0	0	0.05	0.08	0	0	0	0	0	0	0	0	0
[PA14_RS18515]–[PA14_RS18720]:4,056,218:	PA14_RS18515	PA14_45590		two-component sensor	0	0	0	0	0	0	1	0	0	0	0	0	0	0	0	0	0	0	0	0	0	0	0	0	1	0	0
acs ← / ← PA14_RS21505:4,682,074:intergenic (‑153/+29)	PA14_RS21505	PA14_52810		C4-dicarboxylate transporter	0	0	0	-0.09	0	0	0	0	0.15	0	0	0	0	0	0	0.09	0	0	0	0	0	0	0	0	0	0	0.15
acs → / → PA14_RS25600:5,589,435:intergenic (+34/‑63)	PA14_RS25600	PA14_62640		hypothetical protein	0	0	0	0	0	0	0	1	0	0	0	0	0	0	0	0	0	0	0	0	0	0	0	0	0	1	0
acs → / → PA14_RS25600:5,589,464:intergenic (+63/‑34)	PA14_RS25600	PA14_62640		hypothetical protein	0	0	0	0	0	0	-0.21	0	0	0	0	0	0	0	0	0	0	0	0	0	0	0.21	0	0	0	0	0
asd → / → PA14_RS09650:2,068,813:intergenic (+11/‑91)	PA14_RS09650	PA14_23810		aspartate-semialdehyde dehydrogenase	0	0	0	0	0	0	0.12	0	0	0	0	0	0	0	0	0	0	0	0	0	0	0	0	0	0.12	0	0
asd → / → PA14_RS09650:2,068,824:intergenic (+22/‑80)	PA14_RS09650	PA14_23810		aspartate-semialdehyde dehydrogenase	0	0	0	0	0	0	0	0	0.02	0	0	0	0	0	0	0	0	0	0	0	0	0	0	0.29	0	0	0.31
asd → / → PA14_RS09650:2,068,832:intergenic (+30/‑72)	PA14_RS09650	PA14_23810		aspartate-semialdehyde dehydrogenase	0	0	0	0	-0.14	0	0	0	0	0	0	0	0	0	0	0	0.14	0	0	0	0	0	0	0	0	0	0
brnQ → / → PA14_RS15850:3,482,504:intergenic (+65/‑171)	PA14_RS15850	PA14_39060		lipoprotein	0	0	0	0	0	0	-0.13	0	0	0	0	0	0	0	0	0	0	0	0	0	0	0.13	0	0	0	0	0
dsbG → / → PA14_RS13305:2,833,176:intergenic (+10/‑63)	PA14_RS13305	PA14_32630		cytochrome P450	0	0	0	0	0	0	0	0	-0.05	0	0	0	0	0	0	0	0	0	0	0	0	0	0	0.05	0	0	0
dusA ← / → PA14_RS11350:2,421,784:intergenic (‑33/‑270)	PA14_RS11350	PA14_27990		sialidase	0	0	0	0	0	0	-0.06	0	0	0	0	0	0	0	0	0	0	0	0	0	0	0.06	0	0	0	0	0
gdhA ← / ← PA14_RS24805:5,411,482:intergenic (‑260/+36)	PA14_RS24805	PA14_60730		outer membrane protein	0	0	0	-0.12	0	0	0	0	0	0	0	0	0	0	0	0.12	0	0	0	0	0	0	0	0	0	0	0
gdhA ← / ← PA14_RS24805:5,411,484:intergenic (‑262/+34)	PA14_RS24805	PA14_60730		outer membrane protein	0	0	0	0	0	0.08	0	0	0	0	0	0	0	0	0	0	0	0	0	0	0.08	0	0	0	0	0	0
gdhA ← / ← PA14_RS24805:5,411,485:intergenic (‑263/+33)	PA14_RS24805	PA14_60730		outer membrane protein	0	0	0	0	0	0	-0.15	0	0	0	0	0	0	0	0	0	0	0	0	0	0	0.15	0	0	0	0	0
glpK → / → PA14_RS07235:1,547,529:intergenic (+42/‑154)	PA14_RS07235	PA14_18020		PhzF family phenazine biosynthesis protein	0	0	0	0	-0.12	0	0	0	0	0	0	0	0	0	0	0	0.12	0	0	0	0	0	0	0	0	0	0
glpK → / → PA14_RS07235:1,547,542:intergenic (+55/‑141)	PA14_RS07235	PA14_18020		PhzF family phenazine biosynthesis protein	0	0	0	0	0	0.14	0	0	0	0	0	0	0	0	0	0	0	0	0	0	0.14	0	0	0	0	0	0
glpT → / ← PA14_RS28185:6,166,505:intergenic (+36/+1)	PA14_RS28185	PA14_69140		CDP-6-deoxy-delta-3,4-glucoseen reductase	0	0	0	0	0	0	0	0.07	0	0	0	0	0	0	0	0	0	0	0	0	0	0	0	0	0	0.07	0
guaD ← / → PA14_RS00690:151,328:intergenic (‑105/‑1053)	PA14_RS00690	PA14_01670		ABC transporter ATP-binding protein	0	0	0	0	0	-0.12	0	0.13	0	0	0	0	0	0	0	0	0	0.12	0	0	0	0	0	0	0	0.13	0
hydA ← / → PA14_RS02340:511,378:intergenic (‑372/‑244)	PA14_RS02340	PA14_05790		transporter	0	0	0	0	0	0	0	0	-0.14	0	0	0	0	0	0	0	0	0	0	0	0	0	0	0.14	0	0	0
hydA ← / → PA14_RS02340:511,392:intergenic (‑386/‑230)	PA14_RS02340	PA14_05790		transporter	0	0	0	0	0	0	0	0.05	0	0	0	0	0	0	0	0	0	0	0	0	0	0	0	0	0	0.05	0
kynU → / → PA14_RS15305:3,347,318:intergenic (+17/‑139)	PA14_RS15305	PA14_37630		amino acid permease	0	0	0	0	0	0	0	-0.13	0	0	0	0	0	0	0	0	0	0	0	0	0	0	0.13	0	0	0	0
lipA → / ← PA14_RS04915:1,049,279:intergenic (+26/+119)	PA14_RS04915	PA14_12140		transcriptional regulator	0	0	0	0	-0.06	0	0	0	0	0	0	0	0	0	0	0	0.06	0	0	0	0	0	0	0	0	0	0
lipA → / ← PA14_RS04915:1,049,289:intergenic (+36/+109)	PA14_RS04915	PA14_12140		transcriptional regulator	0	0	0	-0.06	0	0	0	0	0	0	0	0	0	0	0	0.06	0	0	0	0	0	0	0	0	0	0	0
lipA → / ← PA14_RS04915:1,049,290:intergenic (+37/+108)	PA14_RS04915	PA14_12140		transcriptional regulator	0	0	0	0	0	-0.06	0	0	0	0	0	0	0	0	0	0	0	0.06	0	0	0	0	0	0	0	0	0
lnt ← / ← PA14_RS04975:1,061,221:intergenic (‑169/+17)	PA14_RS04975	PA14_12300		hypothetical protein	0	0	0	0	0	0	0	-0.09	0	0	0	0	0	0	0	0	0	0	0	0	0	0	0.09	0	0	0	0
mexK → / ← PA14_RS06750:1,441,854:intergenic (+24/+19)	PA14_RS06750	PA14_16830		hypothetical protein	0	0	0	0	0	0.05	0	0	0	0	0	0	0	0	0	0	0	0	0	0	0.05	0	0	0	0	0	0
narI → / → PA14_RS05565:1,190,389:intergenic (+12/‑43)	PA14_RS05565	PA14_13840		peptidyl-prolyl cis-trans isomerase, PpiC-type	0	0	0	-0.07	0	0	-0.08	0	0	0	0	0	0	0	0	0.07	0	0	0	0	0	0.08	0	0	0	0	0
oprM → / ← PA14_RS02265:492,558:intergenic (+17/+79)	PA14_RS02265	PA14_05560		ATP-dependent RNA helicase	0	0	0	0	0	0	0	0.06	0	0	0	0	0	0	0	0	0	0	0	0	0	0	0	0	0	0.06	0
PA14_RS00065 → / ← PA14_RS00070:16,307:intergenic (+33/+29)	PA14_RS00065	PA14_00140		hypothetical protein	0	0	0	0	0	-0.06	0.05	0	0	0	0	0	0	0	0	0	0	0.06	0	0	0	0	0	0	0.05	0	0
PA14_RS00100 → / → dprA:22,805:intergenic (+47/‑88)	PA14_RS00100	PA14_00210		lysin domain-containing protein	0	0	0	0	0	0	0	-0.06	0	0	0	0	0	0	0	0	0	0	0	0	0	0	0.06	0	0	0	0
PA14_RS00110 →:24,506:G162D (GGC→GAC)	PA14_RS00110	PA14_00240		hypothetical protein	0	0	0	0	0	0.17	0	0	0	0	0	0	0	0	0	0	0	0	0	0	0.17	0	0	0	0	0	0
PA14_RS00110 →:24,524:R168P (CGC→CCC)	PA14_RS00110	PA14_00240		hypothetical protein	0	0	0	0	0	-1	0	0	0	0	0	0	0	0	0	0	0	1	0	0	0	0	0	0	0	0	0
PA14_RS00210 → / → PA14_RS31165:52,931:intergenic (+506/‑334)	PA14_RS00210	PA14_00510		hemagglutinin	0	0	0	0	0	0	0	0.01	0	0	0	0	0	0	0	0	0	0	0	0	0	0	0.1	0	0	0.11	0
PA14_RS00255 ← / → PA14_RS00260:62,992:intergenic (‑54/‑709)	PA14_RS00255	PA14_00620		hypothetical protein	0	0	0	0	0	0	0.08	0	0	0	0	0	0	0	0	0	0	0	0	0	0	0	0	0	0.08	0	0
PA14_RS00255 ← / → PA14_RS00260:63,001:intergenic (‑63/‑700)	PA14_RS00255	PA14_00620		hypothetical protein	0	0	0	0	0.17	0	0	0	0	0	0	0	0	0	0	0	0	0	0	0.17	0	0	0	0	0	0	0
PA14_RS00255 ← / → PA14_RS00260:63,003:intergenic (‑65/‑698)	PA14_RS00255	PA14_00620		hypothetical protein	0	0	0	0	0	0	0	0.08	-0.06	0	0	0	0	0	0	0	0	0	0	0	0	0	0	0.06	0	0.08	0
PA14_RS00345 →:78,641:N82K (AAT→AAA)	PA14_RS00345	PA14_00800		hypothetical protein	0	0	0	0	0	0	-0.15	0	0	0	0	0	0	0	0	0	0	0	0	0	0	0.15	0	0	0	0	0
PA14_RS00345 →:78,659:K88N (AAG→AAC)	PA14_RS00345	PA14_00800		hypothetical protein	0	0	0	0.07	0	0	0	0	0	0	0	0	0	0	0	0	0	0	0.07	0	0	0	0	0	0	0	0
PA14_RS00500 →:117,283:R59G (CGC→GGC)	PA14_RS00500	PA14_01190		3-oxoacyl-ACP synthase	0	0	0	-0.14	0.24	0	0	0	0	0	0	0	0	0	0	0.14	0	0	0	0.24	0	0	0	0	0	0	0
PA14_RS00515 → / → PA14_RS00520:121,677:intergenic (+267/‑109)	PA14_RS00515	PA14_01230		hypothetical protein	0	0	0	0	0	0	0	0	0.1	0	0	0	0	0	0	0	0	0	0	0	0	0	0	0	0	0	0.1
PA14_RS00525 →:123,221:S166W (TCG→TGG)	PA14_RS00525	PA14_01250		sulfate transporter	0	0	0	0	0	0	-0.07	0	0	0	0	0	0	0	0	0	0	0	0	0	0	0.07	0	0	0	0	0
PA14_RS00525 →:123,233:D170V (GAC→GTC)	PA14_RS00525	PA14_01250		sulfate transporter	0	0	0	0	0	0	-0.07	0	0	0	0	0	0	0	0	0	0	0	0	0	0	0.07	0	0	0	0	0
PA14_RS00575 →:132,430:A66G (GCG→GGG)	PA14_RS00575	PA14_01380		protoheme IX farnesyltransferase	0	0	0	0	0	-0.08	0	0	0	0	0	0	0	0	0	0	0	0.08	0	0	0	0	0	0	0	0	0
PA14_RS00585 ←:133,862:M147R (ATG→AGG)	PA14_RS00585	PA14_01400		hypothetical protein	0	0	0	0	0	-0.07	0	0	0	0	0	0	0	0	0	0	0	0.07	0	0	0	0	0	0	0	0	0
PA14_RS00585 ←:133,958:L115H (CTC→CAC)	PA14_RS00585	PA14_01400		hypothetical protein	0	0	0	0.06	0	0	0	0	0	0	0	0	0	0	0	0	0	0	0.06	0	0	0	0	0	0	0	0
PA14_RS00595 →:135,554:Q131H (CAG→CAC)	PA14_RS00595	PA14_01430		short chain dehydrogenase	0	0	0	0	0	-0.11	0	0	-0.06	0	0	0	0	0	0	0	0	0.11	0	0	0	0	0	0.06	0	0	0
PA14_RS00615 → / → PA14_RS00620:139,694:intergenic (+43/‑161)	PA14_RS00615	PA14_01480		hypothetical protein	0	0	0	0	0	0	0.05	0	0	0	0	0	0	0	0	0	0	0	0	0	0	0	0	0	0.05	0	0
PA14_RS00625 ←:140,715:R156P (CGC→CCC)	PA14_RS00625	PA14_01500		transcriptional regulator	0	0	0	0	0	0	0	-0.19	0	0	0	0	0	0	0	0	0	0	0	0	0	0	0.19	0	0	0	0
PA14_RS00625 ←:140,715:R156P (CGC→CCC) ‡	PA14_RS00625	PA14_01500		transcriptional regulator	0	0	0	0	-0.2	0	0	0	0	0	0	0	0	0	0	0	0.2	0	0	0	0	0	0	0	0	0	0
PA14_RS00625 ←:140,716:R156G (CGC→GGC) ‡	PA14_RS00625	PA14_01500		transcriptional regulator	0	0	0	0	-0.06	0	0	0	0	0	0	0	0	0	0	0	0.06	0	0	0	0	0	0	0	0	0	0
PA14_RS00625 ←:140,718:A155G (GCG→GGG)	PA14_RS00625	PA14_01500		transcriptional regulator	0	0	0	0	-0.13	0	0.08	0	-0.09	0	0	0	0	0	0	0	0.13	0	0	0	0	0	0	0.09	0.08	0	0
PA14_RS00690 →:152,642:I88F (ATC→TTC)	PA14_RS00690	PA14_01670		ABC transporter ATP-binding protein	0	0	0	0	0	0	0	-0.08	0	0	0	0	0	0	0	0	0	0	0	0	0	0	0.08	0	0	0	0
PA14_RS00745 →:164,893:L22L (CTC→CTG)	PA14_RS00745	PA14_01800		hypothetical protein	0	0	0	0	-0.08	0	0	0	0	0	0	0	0	0	0	0	0.08	0	0	0	0	0	0	0	0	0	0
PA14_RS00745 →:164,905:A26A (GCT→GCA)	PA14_RS00745	PA14_01800		hypothetical protein	0	0	0	0.12	0	0	0.11	0	0	0	0	0	0	0	0	0	0	0	0.12	0	0	0	0	0	0.11	0	0
PA14_RS00745 →:164,907:L27R (CTC→CGC)	PA14_RS00745	PA14_01800		hypothetical protein	0	0	0	0	0	0	0.04	0	0	0	0	0	0	0	0	0	0	0	0	0	0	0.11	0	0	0.15	0	0
PA14_RS00765 →:169,027:R92C (CGC→TGC)	PA14_RS00765	PA14_01860		transmembrane sensor	0	0	0	0	0	0.05	0	0	0	0	0	0	0	0	0	0	0	0	0	0	0.05	0	0	0	0	0	0
PA14_RS00770 →:170,041:A49P (GCG→CCG)	PA14_RS00770	PA14_01870		TonB-dependent receptor	0	0	0	0.1	-0.1	0	-0.14	0	0	0	0	0	0	0	0	0	0.1	0	0.1	0	0	0.14	0	0	0	0	0
PA14_RS00815 → / → PA14_RS00825:182,985:intergenic (+118/‑469)	PA14_RS00815	PA14_01990		hypothetical protein	0	0	0	0	0	0	0	0	0.12	0	0	0	0	0	0	0	0	0	0	0	0	0	0	0	0	0	0.12
PA14_RS00900 ←:200,402:V33G (GTC→GGC)	PA14_RS00900	PA14_02220		chemotaxis transducer	0	0	0	0	0	-1	0	0	0	0	0	0	0	0	0	0	0	1	0	0	0	0	0	0	0	0	0
PA14_RS00920 ←:204,064:N209T (AAC→ACC)	PA14_RS00920	PA14_02270		chemotaxis transducer	0	0	0	0	0	0	0	0	-0.07	0	0	0	0	0	0	0	0	0	0	0	0	0	0	0.07	0	0	0
PA14_RS00925 ←:205,192:R208R (CGG→CGC)	PA14_RS00925	PA14_02290		LysR family transcriptional regulator	0	0	0	0	0	0	0	0	-0.08	0	0	0	0	0	0	0	0	0	0	0	0	0	0	0.08	0	0	0
PA14_RS00925 ←:205,214:V201G (GTG→GGG)	PA14_RS00925	PA14_02290		LysR family transcriptional regulator	0	0	0	0	-0.07	0	-0.06	0	0	0	0	0	0	0	0	0	0.07	0	0	0	0	0.06	0	0	0	0	0
PA14_RS00965 ←:215,262:P99R (CCG→CGG)	PA14_RS00965	PA14_02390		transcriptional regulator	0	0	0	0	0	-0.11	0	0.1	0	0	0	0	0	0	0	0	0	0.11	0	0	0	0	0	0	0	0.1	0
PA14_RS00970 →:216,021:A38A (GCT→GCA)	PA14_RS00970	PA14_02410		TonB-dependent receptor	0	0	0	0	0	-0.08	0	-0.06	0	0	0	0	0	0	0	0	0	0.08	0	0	0	0	0.06	0	0	0	0
PA14_RS01165 →:256,919:G168G (GGT→GGA)	PA14_RS01165	PA14_02910		IclR family transcriptional regulator	0	0	0	0	0	0	0	0.08	0	0	0	0	0	0	0	0	0	0	0	0	0	0	0	0	0	0.08	0
PA14_RS01165 →:256,931:P172P (CCG→CCC)	PA14_RS01165	PA14_02910		IclR family transcriptional regulator	0	0	0	0.09	0	0	0	0	0	0	0	0	0	0	0	0	0	0	0.09	0	0	0	0	0	0	0	0
PA14_RS01255 ←:275,811:L70R (CTG→CGG)	PA14_RS01255	PA14_03130		hypothetical protein	0	0	0	0	0.09	0	-0.09	0.07	0	0	0	0	0	0	0	0	0	0	0	0.09	0	0.09	0	0	0	0.07	0
PA14_RS01255 ←:275,838:A61G (GCG→GGG)	PA14_RS01255	PA14_03130		hypothetical protein	0	0	0	0	-0.08	0	0	0	0	0	0	0	0	0	0	0	0.08	0	0	0	0	0	0	0	0	0	0
PA14_RS01480 → / ← PA14_RS01485:325,574:intergenic (+8/+32)	PA14_RS01480	PA14_03590		hypothetical protein	0	0	0	0	0	0	0	-0.08	0	0	0	0	0	0	0	0	0	0	0	0	0	0	0.08	0	0	0	0
PA14_RS01480 → / ← PA14_RS01485:325,590:intergenic (+24/+16)	PA14_RS01480	PA14_03590		hypothetical protein	0	0	0	0	0	0	0	0.12	0	0	0	0	0	0	0	0	0	0	0	0	0	0	0	0	0	0.12	0
PA14_RS01485 ←:325,608:*253K (TAA→AAA)	PA14_RS01485	PA14_03610		Zn-dependent protease with chaperone function	0	0	0	0	0	0	0	0	0.1	0	0	0	0	0	0	0	0	0	0	0	0	0	0	0	0	0	0.1
PA14_RS01530 → / → PA14_RS01535:336,223:intergenic (+125/‑104)	PA14_RS01530	PA14_03730		fatty acid desaturase	0	0	0	0.1	0	-0.09	0	0.06	0	0	0	0	0	0	0	0	0	0.09	0.1	0	0	0	0	0	0	0.06	0
PA14_RS01575 ← / ← PA14_RS01580:347,103:intergenic (‑155/+101)	PA14_RS01575	PA14_03855		periplasmic polyamine binding protein	0	0	0	0	0	0	-0.07	-0.06	0.06	0	0	0	0	0	0	0	0	0	0	0	0	0.07	0.06	0	0	0	0.06
PA14_RS01695 → / → PA14_RS01700:373,006:intergenic (+26/‑73)	PA14_RS01695	PA14_04150		hypothetical protein	0	0	0	0	0.1	0	0	0	-0.06	0	0	0	0	0	0	0	0	0	0	0.1	0	0	0	0.06	0	0	0
PA14_RS01705 → / ← PA14_RS01710:374,509:intergenic (+7/+74)	PA14_RS01705	PA14_04180		hypothetical protein	0	0	0	0	0	0	-0.08	0	0	0	0	0	0	0	0	0	0	0	0	0	0	0.08	0	0	0	0	0
PA14_RS01705 →:374,500:*117K (TAA→AAA)	PA14_RS01705	PA14_04180		hypothetical protein	0	0	0	0.06	0	0	0	0	0	0	0	0	0	0	0	0	0	0	0.06	0	0	0	0	0	0	0	0
PA14_RS01725 ←:378,682:G216R (GGC→CGC)	PA14_RS01725	PA14_04230		ABC transporter permease	0	0	0	0	0.06	0	0	0	0	0	0	0	0	0	0	0	0	0	0	0.06	0	0	0	0	0	0	0
PA14_RS01770 →:388,548:A46G (GCG→GGG)	PA14_RS01770	PA14_04340		hypothetical protein	0	0	0	0	0	0	-0.06	0	0	0	0	0	0	0	0	0	0	0	0	0	0	0.06	0	0	0	0	0
PA14_RS01785 ←:391,425:I214F (ATT→TTT)	PA14_RS01785	PA14_04380		hypothetical protein	0	0	0	0	0	0	0.06	0	0	0	0	0	0	0	0	0	0	0	0	0	0	0	0	0	0.06	0	0
PA14_RS02150 ←:461,524:A186G (GCC→GGC)	PA14_RS02150	PA14_05290		hypothetical protein	0	0	0	0	0	0	0.06	0	0	0	0	0	0	0	0	0	0	0	0	0	0	0	0	0	0.06	0	0
PA14_RS02280 ← / ← PA14_RS02285:497,442:intergenic (‑26/+15)	PA14_RS02280	PA14_05600		hypothetical protein	0	0	0	0.18	0	0	0.2	-0.17	0.16	0	0	0	0	0	0	0	0	0	0.18	0	0	0	0.17	0	0.2	0	0.16
PA14_RS02280 ←:497,307:Y37F (TAT→TTT)	PA14_RS02280	PA14_05600		hypothetical protein	0	0	0	0	-0.09	0	0	0	0	0	0	0	0	0	0	0	0.09	0	0	0	0	0	0	0	0	0	0
PA14_RS02375 →:522,184:L424V (CTG→GTG)	PA14_RS02375	PA14_05880		membrane-bound protease	0	0	0	0	-0.07	0	0	0	0	0	0	0	0	0	0	0	0.07	0	0	0	0	0	0	0	0	0	0
PA14_RS02480 ←:545,479:D278A (GAC→GCC)	PA14_RS02480	PA14_06170		transmembrane sensor	0	0	0	0	0	0	0.07	0	-0.07	0	0	0	0	0	0	0	0	0	0	0	0	0	0	0.07	0.07	0	0
PA14_RS02520 ← / → pcaD:553,584:intergenic (‑61/‑43)	PA14_RS02520	PA14_06260		LysR family transcriptional regulator	0	0	0	0	0	0	0.07	0	0	0	0	0	0	0	0	0	0	0	0	0	0	0	0	0	0.07	0	0
PA14_RS02520 ← / → pcaD:553,610:intergenic (‑87/‑17)	PA14_RS02520	PA14_06260		LysR family transcriptional regulator	0	0	0	0	0	0	0	0.06	0	0	0	0	0	0	0	0	0	0	0	0	0	0	0	0	0	0.06	0
PA14_RS02555 ←:560,510:L229V (CTG→GTG)	PA14_RS02555	PA14_06330		serine/threonine protein kinase	0	0	0	0.1	0	0	0	0	0	0	0	0	0	0	0	0	0	0	0.1	0	0	0	0	0	0	0	0
PA14_RS02555 ←:560,868:R109R (CGC→CGG)	PA14_RS02555	PA14_06330		serine/threonine protein kinase	0	0	0	0	0	0	0.06	0	0	0	0	0	0	0	0	0	0	0	0	0	0	0	0	0	0.06	0	0
PA14_RS02595 →:566,195:P135A (CCG→GCG)	PA14_RS02595	PA14_06450		acetyl-CoA carboxylase biotin carboxylase subunit	0	0	0	0	0	0.16	0	0	0	0	0	0	0	0	0	0	0	0	0	0	0.16	0	0	0	0	0	0
PA14_RS02595 →:566,214:L141R (CTG→CGG)	PA14_RS02595	PA14_06450		acetyl-CoA carboxylase biotin carboxylase subunit	0	0	0	0.09	0	0	0	0	0	0	0	0	0	0	0	0	0	0	0.09	0	0	0	0	0	0	0	0
PA14_RS02865 →:618,214:H28P (CAT→CCT)	PA14_RS02865	PA14_07140		hypothetical protein	0	0	0	0	0	0	0.07	0	0	0	0	0	0	0	0	0	0	0	0	0	0	0	0	0	0.07	0	0
PA14_RS02865 →:618,215:H28Q (CAT→CAG)	PA14_RS02865	PA14_07140		hypothetical protein	0	0	0	0	0	0	0	0.17	-0.15	0	0	0	0	0	0	0	0	0	0	0	0	0	0	0.15	0	0.17	0
PA14_RS02885 → / → PA14_RS02890:622,817:intergenic (+125/‑35)	PA14_RS02885	PA14_07200		hypothetical protein	0	0	0	0	0	0.05	0	0	0	0	0	0	0	0	0	0	0	0	0	0	0.05	0	0	0	0	0	0
PA14_RS02885 → / → PA14_RS02890:622,851:intergenic (+159/‑1)	PA14_RS02885	PA14_07200		hypothetical protein	0	0	0	0	0	-0.05	0	0	0	0	0	0	0	0	0	0	0	0.05	0	0	0	0	0	0	0	0	0
PA14_RS02890 →:622,858:Y3N (TAC→AAC) ‡	PA14_RS02890	PA14_07210		hypothetical protein	0	0	0	0	0	0	0	0.11	0	0	0	0	0	0	0	0	0	0	0	0	0	0	0	0	0	0.11	0
PA14_RS02890 →:622,860:Y3* (TAC→TAA) ‡	PA14_RS02890	PA14_07210		hypothetical protein	0	0	0	0	0	0	0	0.08	0	0	0	0	0	0	0	0	0	0	0	0	0	0	0	0	0	0.08	0
PA14_RS02890 →:622,874:L8R (CTG→CGG)	PA14_RS02890	PA14_07210		hypothetical protein	0	0	0	0.08	0	0	0	0	0	0	0	0	0	0	0	0	0	0	0.08	0	0	0	0	0	0	0	0
PA14_RS02890 →:622,878:L9L (CTC→CTG)	PA14_RS02890	PA14_07210		hypothetical protein	0	0	0	0	0	-0.1	0	0	0	0	0	0	0	0	0	0	0	0.1	0	0	0	0	0	0	0	0	0
PA14_RS02890 →:622,886:L12R (CTC→CGC)	PA14_RS02890	PA14_07210		hypothetical protein	0	0	0	0	0	0	0	0	0.12	0	0	0	0	0	0	0	0	0	0	0	0	0	0	0	0	0	0.12
PA14_RS02890 →:623,175:R108R (CGC→CGG)	PA14_RS02890	PA14_07210		hypothetical protein	0	0	0	0	0	0	-0.08	0	0	0	0	0	0	0	0	0	0	0	0	0	0	0.08	0	0	0	0	0
PA14_RS02930 ← / ← PA14_RS02935:630,008:intergenic (‑27/+102)	PA14_RS02930	PA14_07310		hydrolase	0	0	0	0	0	0	0	0	-0.08	0	0	0	0	0	0	0	0	0	0	0	0	0	0	0.08	0	0	0
PA14_RS02930 ← / ← PA14_RS02935:630,016:intergenic (‑35/+94)	PA14_RS02930	PA14_07310		hydrolase	0	0	0	-0.06	0	0	0	0	0	0	0	0	0	0	0	0.06	0	0	0	0	0	0	0	0	0	0	0
PA14_RS02930 ← / ← PA14_RS02935:630,025:intergenic (‑44/+85)	PA14_RS02930	PA14_07310		hydrolase	0	0	0	-0.08	0	0	0	0	-0.07	0	0	0	0	0	0	0.08	0	0	0	0	0	0	0	0.07	0	0	0
PA14_RS02930 ← / ← PA14_RS02935:630,036:intergenic (‑55/+74)	PA14_RS02930	PA14_07310		hydrolase	0	0	0	0	0	0	0.07	0	0	0	0	0	0	0	0	0	0	0	0	0	0	0	0	0	0.07	0	0
PA14_RS02985 ←:638,384:A87A (GCA→GCT)	PA14_RS02985	PA14_07440		hypothetical protein	0	0	0	0	0	0	0	0	-0.08	0	0	0	0	0	0	0	0	0	0	0	0	0	0	0.08	0	0	0
PA14_RS02985 ←:638,466:V60D (GTC→GAC)	PA14_RS02985	PA14_07440		hypothetical protein	0	0	0	0	0	0	-0.05	0	0	0	0	0	0	0	0	0	0	0	0	0	0	0.05	0	0	0	0	0
PA14_RS03155 →:680,485:A186P (GCC→CCC)	PA14_RS03155	PA14_07890		ABC transporter permease	0	0	0	0.23	0.29	-0.12	0	-0.02	0	0	0	0	0	0	0	0	0	0.12	0.23	0.29	0	0	0.22	0	0	0.2	0
PA14_RS03275 →:701,170:G168S (GGT→AGT)	PA14_RS03275	PA14_08160		lytic enzyme	0	0	0	0	-0.02	0.06	0	0	0	0	0	0	0	0	0	0	0.08	0	0	0.06	0.06	0	0	0	0	0	0
PA14_RS03275 →:701,178:G170G (GGG→GGC)	PA14_RS03275	PA14_08160		lytic enzyme	0	0	0	0	-0.01	0.06	0	0	0	0	0	0	0	0	0	0	0.07	0	0	0.06	0.06	0	0	0	0	0	0
PA14_RS03275 →:701,179:L171F (CTC→TTC) ‡	PA14_RS03275	PA14_08160		lytic enzyme	0	0	0	0	-0.01	0.06	0	0	0	0	0	0	0	0	0	0	0.07	0	0	0.06	0.06	0	0	0	0	0	0
PA14_RS03275 →:701,181:L171L (CTC→CTG) ‡	PA14_RS03275	PA14_08160		lytic enzyme	0	0	0	0	-0.02	0.06	0	0	0	0	0	0	0	0	0	0	0.07	0	0	0.05	0.06	0	0	0	0	0	0
PA14_RS03320 →:706,812:L176R (CTG→CGG)	PA14_RS03320	PA14_08270		hypothetical protein	0	0	0	0	0	0	0	-0.09	0	0	0	0	0	0	0	0	0	0	0	0	0	0	0.09	0	0	0	0
PA14_RS03320 →:706,844:M187L (ATG→TTG)	PA14_RS03320	PA14_08270		hypothetical protein	0	0	0	0	0	-0.15	0	0	0	0	0	0	0	0	0	0	0	0.15	0	0	0	0	0	0	0	0	0
PA14_RS03330 →:707,785:I5N (ATC→AAC)	PA14_RS03330	PA14_08300		phage-related protein, tail component	0	0	0	0	0	0.06	0	0	0.06	0	0	0	0	0	0	0	0	0	0	0	0.06	0	0	0	0	0	0.06
PA14_RS03345 → / → PA14_RS03350:714,276:intergenic (+234/‑185)	PA14_RS03345	PA14_08330		hypothetical protein	0	0	0	-0.1	0	0	0	0	0	0	0	0	0	0	0	0.1	0	0	0	0	0	0	0	0	0	0	0
PA14_RS03905 ←:829,056:E535V (GAG→GTG)	PA14_RS03905	PA14_09660		acyl-CoA synthetase	0	0	0	0	0	0	0	0	-0.06	0	0	0	0	0	0	0	0	0	0	0	0	0	0	0.06	0	0	0
PA14_RS03925 ←:836,017:E227A (GAG→GCG)	PA14_RS03925	PA14_09710		aldehyde dehydrogenase	0	0	0	0	0.07	0	0	0	0	0	0	0	0	0	0	0	0	0	0	0.07	0	0	0	0	0	0	0
PA14_RS03925 ←:836,059:I213N (ATC→AAC)	PA14_RS03925	PA14_09710		aldehyde dehydrogenase	0	0	0	0	-0.11	0	0	0	0	0	0	0	0	0	0	0	0.11	0	0	0	0	0	0	0	0	0	0
PA14_RS03925 ←:836,446:R84P (CGC→CCC)	PA14_RS03925	PA14_09710		aldehyde dehydrogenase	0	0	0	0	0	-0.1	0	0	0	0	0	0	0	0	0	0	0	0.1	0	0	0	0	0	0	0	0	0
PA14_RS03965 ←:844,118:N122K (AAT→AAA)	PA14_RS03965	PA14_09810		hypothetical protein	0	0	0	0	0	0	0	0	-0.08	0	0	0	0	0	0	0	0	0	0	0	0	0	0	0.08	0	0	0
PA14_RS04025 →:856,330:Q130L (CAG→CTG)	PA14_RS04025	PA14_09960		hypothetical protein	0	0	0	0	0	-0.08	0	0	0	0	0	0	0	0	0	0	0	0.08	0	0	0	0	0	0	0	0	0
PA14_RS04150 ←:883,909:G126A (GGC→GCC) ‡	PA14_RS04150	PA14_10260		dehydrogenase E1 component	0	0	0	0	0	0.2	0	0	0	0	0	0	0	0	0	0	0	0	0	0	0.2	0	0	0	0	0	0
PA14_RS04150 ←:883,910:G126R (GGC→CGC) ‡	PA14_RS04150	PA14_10260		dehydrogenase E1 component	0	0	0	0	0	0.32	0	0	0	0	0	0	0	0	0	0	0	0	0	0	0.32	0	0	0	0	0	0
PA14_RS04200 ←:895,881:E534V (GAG→GTG)	PA14_RS04200	PA14_10370		hypothetical protein	0	0	0	0	0	0	0	0	-0.07	0	0	0	0	0	0	0	0	0	0	0	0	0	0	0.07	0	0	0
PA14_RS04205 ← / → PA14_RS04210:897,919:intergenic (‑7/‑752)	PA14_RS04205	PA14_10380		hypothetical protein	0	0	0	0	-0.07	0	0	0	0	0	0	0	0	0	0	0	0.07	0	0	0	0	0	0	0	0	0	0
PA14_RS04340 →:928,550:N267T (AAC→ACC)	PA14_RS04340	PA14_10770		sensor/response regulator hybrid	0	0	0	0	0	0.13	-0.18	0	0	0	0	0	0	0	0	0	0	0	0	0	0.13	0.18	0	0	0	0	0
PA14_RS04340 →:928,563:A271A (GCG→GCC)	PA14_RS04340	PA14_10770		sensor/response regulator hybrid	0	0	0	0	0	0	0	0	-0.08	0	0	0	0	0	0	0	0	0	0	0	0	0	0	0.08	0	0	0
PA14_RS04340 →:930,854:A1035G (GCC→GGC)	PA14_RS04340	PA14_10770		sensor/response regulator hybrid	0	0	0	0	0	0	0	0.08	0	0	0	0	0	0	0	0	0	0	0	0	0	0	0	0	0	0.08	0
PA14_RS04375 ← / ← PA14_RS04380:940,471:intergenic (‑40/+115)	PA14_RS04375	PA14_10850		dehydrogenase	0	0	0	-0.11	0.15	-0.1	-0.09	0	0	0.11	0	0	0.11	0	0	0.11	0	0.1	0	0.15	0	0.09	0	0	0	0	0
PA14_RS04375 ←:940,420:T4T (ACT→ACA)	PA14_RS04375	PA14_10850		dehydrogenase	0	0	0	0	0	0	0	0.06	0	0	0	0	0	0	0	0	0	0	0	0	0	0	0	0	0	0.06	0
PA14_RS04395 ←:945,012:N6K (AAT→AAA)	PA14_RS04395	PA14_10910		major facilitator transporter	0	0	0	0	0	0	0	0	-0.08	0	0	0	0	0	0	0	0	0	0	0	0	0	0	0.08	0	0	0
PA14_RS04515 →:972,289:D66V (GAC→GTC)	PA14_RS04515	PA14_11170		hypothetical protein	0	0	0	0	-0.08	0	0.08	-0.1	0	0	0	0	0	0	0	0	0.08	0	0	0	0	0	0.1	0	0.08	0	0
PA14_RS04565 ←:982,438:L33Q (CTG→CAG)	PA14_RS04565	PA14_11280		hypothetical protein	0	0	0	0	0	0	0	-0.06	0	0	0	0	0	0	0	0	0	0	0	0	0	0	0.06	0	0	0	0
PA14_RS04685 →:1,001,173:S27C (AGC→TGC)	PA14_RS04685	PA14_11580		hypothetical protein	0	0	0	0	0	-0.06	0	0	0	0	0	0	0	0	0	0	0	0.06	0	0	0	0	0	0	0	0	0
PA14_RS04690 ←:1,003,064:Q147L (CAG→CTG)	PA14_RS04690	PA14_11590		hypothetical protein	0	0	0	0	-0.02	0	0	0	0	0	0	0	0	0	0	0	0.07	0	0	0.05	0	0	0	0	0	0	0
PA14_RS04690 ←:1,003,092:L138V (CTG→GTG)	PA14_RS04690	PA14_11590		hypothetical protein	0	0	0	0	0	-0.06	0	0	0	0	0	0	0	0	0	0	0	0.06	0	0	0	0	0	0	0	0	0
PA14_RS04690 ←:1,003,111:A131A (GCG→GCC)	PA14_RS04690	PA14_11590		hypothetical protein	0	0	0	0	0	-0.1	0	0.13	0	0	0	0	0	0	0	0	0	0.1	0	0	0	0	0	0	0	0.13	0
PA14_RS04715 ← / ← aqpZ:1,010,846:intergenic (‑147/+19)	PA14_RS04715	PA14_11650		hypothetical protein	0	0	0	0	0	0	0.12	0.07	0.09	0	0	0	0	0	0	0	0	0	0	0	0	0	0	0	0.12	0.07	0.09
PA14_RS04785 →:1,025,836:R507P (CGC→CCC)	PA14_RS04785	PA14_11830		transcriptional regulator	0	0	0	0	0	0	-0.08	0	0	0	0	0	0	0	0	0	0	0	0	0	0	0.08	0	0	0	0	0
PA14_RS04785 →:1,025,838:S508R (AGC→CGC)	PA14_RS04785	PA14_11830		transcriptional regulator	0	0	0	0	0	-0.09	-0.09	0	0.08	0	0	0	0	0	0	0	0	0.09	0	0	0	0.09	0	0	0	0	0.08
PA14_RS04805 ← / ← PA14_RS04810:1,029,374:intergenic (‑37/+10)	PA14_RS04805	PA14_11890		hypothetical protein	0	0	0	0	0	0	-0.07	0	0	0	0	0	0	0	0	0	0	0	0	0	0	0.07	0	0	0	0	0
PA14_RS04805 ←:1,029,263:I25I (ATA→ATT)	PA14_RS04805	PA14_11890		hypothetical protein	0	0	0	0	0	0	-0.06	0	0	0	0	0	0	0	0	0	0	0	0	0	0	0.06	0	0	0	0	0
PA14_RS04850 ←:1,036,822:F340C (TTC→TGC)	PA14_RS04850	PA14_11990		hydrolase	0	0	0	0	-0.15	0	0	0	0	0	0	0	0	0	0	0	0.15	0	0	0	0	0	0	0	0	0	0
PA14_RS04850 ←:1,036,849:A331G (GCG→GGG)	PA14_RS04850	PA14_11990		hydrolase	0	0	0	-0.09	0.05	0	0	0	0	0	0	0	0	0	0	0.09	0	0	0	0.05	0	0	0	0	0	0	0
PA14_RS04890 →:1,045,566:T184P (ACC→CCC)	PA14_RS04890	PA14_12090		RlpA family lipoprotein	0	0	0	0	-0.07	0	0	0	0	0	0	0	0	0	0	0	0.07	0	0	0	0	0	0	0	0	0	0
PA14_RS04890 →:1,045,744:Q243P (CAG→CCG)	PA14_RS04890	PA14_12090		RlpA family lipoprotein	0	0	0	0	-0.18	0	0	0	0	0	0	0	0	0	0	0	0.18	0	0	0	0	0	0	0	0	0	0
PA14_RS04890 →:1,045,759:V248G (GTG→GGG)	PA14_RS04890	PA14_12090		RlpA family lipoprotein	0	0	0	-0.06	0	0	0	0	0	0	0	0	0	0	0	0.06	0	0	0	0	0	0	0	0	0	0	0
PA14_RS05000 ← / ← hemL:1,066,236:intergenic (‑134/+75)	PA14_RS05000	PA14_12370		hypothetical protein	0	0	0	0	0	0	0	0.06	0	0	0	0	0	0	0	0	0	0	0	0	0	0	0	0	0	0.06	0
PA14_RS05000 ← / ← hemL:1,066,266:intergenic (‑164/+45)	PA14_RS05000	PA14_12370		hypothetical protein	0	0	0	0	0	0	0	-0.09	0	0	0	0	0	0	0	0	0	0	0	0	0	0	0.09	0	0	0	0
PA14_RS05065 ←:1,079,158:G53G (GGC→GGG)	PA14_RS05065	PA14_12560		hypothetical protein	0	0	0	0	0	0	0	0	-0.06	0	0	0	0	0	0	0	0	0	0	0	0	0	0	0.06	0	0	0
PA14_RS05145 →:1,094,303:S416C (AGT→TGT)	PA14_RS05145	PA14_12760		ATP-dependent RNA helicase	0	0	0	0	0	0	-0.07	0	0	0	0	0	0	0	0	0	0	0	0	0	0	0.07	0	0	0	0	0
PA14_RS05215 → / → tauD:1,110,149:intergenic (+15/‑92)	PA14_RS05215	PA14_12960		taurine ABC transporter permease	0	0	0	0.1	0	0	0	0	0	0	0	0	0	0	0	0	0	0	0.1	0	0	0	0	0	0	0	0
PA14_RS05215 → / → tauD:1,110,153:intergenic (+19/‑88)	PA14_RS05215	PA14_12960		taurine ABC transporter permease	0	0	0	0	0	0	-0.15	0	0	0	0	0	0	0	0	0	0	0	0	0	0	0.15	0	0	0	0	0
PA14_RS05235 ← / ← PA14_RS05240:1,116,567:intergenic (‑61/+115)	PA14_RS05235	PA14_13000		transcriptional regulator	0	0	0	0	0	0	0.06	0	0	0	0	0	0	0	0	0	0	0	0	0	0	0	0	0	0.06	0	0
PA14_RS05280 → / → PA14_RS05285:1,128,152:intergenic (+13/‑48)	PA14_RS05280	PA14_13130		hypothetical protein	0	0	0	0	0	-0.14	0	0.18	0	0	0	0	0	0	0	0	0	0.14	0	0	0	0	0	0	0	0.18	0
PA14_RS05280 →:1,128,109:F632L (TTC→TTG)	PA14_RS05280	PA14_13130		hypothetical protein	0	0	0	0.01	0	0	-0.07	0	0	0	0	0	0	0	0	0.07	0	0	0.08	0	0	0.07	0	0	0	0	0
PA14_RS05280 →:1,128,113:A634P (GCG→CCG)	PA14_RS05280	PA14_13130		hypothetical protein	0	0	0	0	0	-0.06	0	0	0	0	0	0	0	0	0	0	0	0.06	0	0	0	0	0	0	0	0	0
PA14_RS05280 →:1,128,128:M639L (ATG→TTG)	PA14_RS05280	PA14_13130		hypothetical protein	0	0	0	0.09	0	0	0	0	0	0	0	0	0	0	0	0	0	0	0.09	0	0	0	0	0	0	0	0
PA14_RS05360 →:1,145,469:L271V (CTG→GTG)	PA14_RS05360	PA14_13330		hypothetical protein	0	0	0	0	0	0	0	-0.05	0	0	0	0	0	0	0	0	0	0	0	0	0	0	0.05	0	0	0	0
PA14_RS05365 → / ← PA14_RS05370:1,148,621:intergenic (+21/+301)	PA14_RS05365	PA14_13340		extracellular nuclease	0	0	0	0	0	-0.06	0	0.09	0	0	0	0	0	0	0	0	0	0.06	0	0	0	0	0	0	0	0.09	0
PA14_RS05365 → / ← PA14_RS05370:1,148,635:intergenic (+35/+287)	PA14_RS05365	PA14_13340		extracellular nuclease	0	0	0	0	0	0	0	-0.13	0	0	0	0	0	0	0	0	0	0	0	0	0	0	0.13	0	0	0	0
PA14_RS05365 →:1,146,603:L116V (CTG→GTG)	PA14_RS05365	PA14_13340		extracellular nuclease	0	0	0	-0.18	0	0	0	0	0	0	0	0	0	0	0	0.18	0	0	0	0	0	0	0	0	0	0	0
PA14_RS05390 ←:1,151,641:I25M (ATC→ATG)	PA14_RS05390	PA14_13390		hypothetical protein	0	0	0	-0.07	0	0	0	0	0	0	0	0	0	0	0	0.07	0	0	0	0	0	0	0	0	0	0	0
PA14_RS05440 →:1,164,062:L464H (CTC→CAC)	PA14_RS05440	PA14_13520		outer membrane protein	0	0	0	0	0	0	0	0	-0.06	0	0	0	0	0	0	0	0	0	0	0	0	0	0	0.06	0	0	0
PA14_RS05500 ←:1,175,255:I17S (ATC→AGC)	PA14_RS05500	PA14_13670		hypothetical protein	0	0	0	0	-0.1	0	0	0	0	0	0	0	0	0	0	0	0.1	0	0	0	0	0	0	0	0	0	0
PA14_RS05660 →:1,211,526:G119A (GGC→GCC)	PA14_RS05660	PA14_14160		acetyltransferase	0	0	0	0	-0.1	0	0	0	0	0	0	0	0	0	0	0	0.1	0	0	0	0	0	0	0	0	0	0
PA14_RS05675 →:1,214,178:S140R (AGC→CGC)	PA14_RS05675	PA14_14210		hypothetical protein	0	0	0	0	0	0	0	-0.07	0	0	0	0	0	0	0	0	0	0	0	0	0	0	0.07	0	0	0	0
PA14_RS05695 →:1,218,050:F79Y (TTC→TAC)	PA14_RS05695	PA14_14270		isochorismatase family hydrolase	0	0	0	0	0	0	0	0	-0.05	0	0	0	0	0	0	0	0	0	0	0	0	0	0	0.05	0	0	0
PA14_RS05695 →:1,218,087:P91P (CCC→CCG)	PA14_RS05695	PA14_14270		isochorismatase family hydrolase	0	0	0	0	0	-0.09	0	0	0	0	0	0	0	0	0	0	0	0.09	0	0	0	0	0	0	0	0	0
PA14_RS05695 →:1,218,094:D94H (GAC→CAC)	PA14_RS05695	PA14_14270		isochorismatase family hydrolase	0	0	0	0	0	0	0	0	-0.08	0	0	0	0	0	0	0	0	0	0	0	0	0	0	0.08	0	0	0
PA14_RS05740 ← / ← PA14_RS05745:1,226,053:intergenic (‑107/+12)	PA14_RS05740	PA14_14360		sodium:sulfate symporter	0	0	0	0.08	0	0	0	-0.07	0.06	0	0	0	0	0	0	0	0	0	0.08	0	0	0	0.07	0	0	0	0.06
PA14_RS05850 → / ← PA14_RS05855:1,251,111:intergenic (+41/+64)	PA14_RS05850	PA14_14660		hypothetical protein	0	0	0	0	-0.07	0	0	0	0	0	0	0	0	0	0	0	0.07	0	0	0	0	0	0	0	0	0	0
PA14_RS05855 ←:1,251,590:G134A (GGC→GCC)	PA14_RS05855	PA14_14680		extragenic suppressor protein SuhB	0	0	0	0	0	0	-1	0	0	0	0	0	0	0	0	0	0	0	0	0	0	1	0	1	0	0	1
PA14_RS06005 ←:1,280,412:G87A (GGC→GCC)	PA14_RS06005	PA14_15090		hypothetical protein	0	0	0	0	-0.13	0	0	0	0	0	0	0	0	0	0	0	0.13	0	0	0	0	0	0	0	0	0	0
PA14_RS06025 →:1,283,266:G146G (GGC→GGG)	PA14_RS06025	PA14_15130		hypothetical protein	0	0	0	0	0	0	0	0.13	0	0	0	0	0	0	0	0	0	0	0	0	0	0	0	0	0	0.13	0
PA14_RS06025 →:1,283,283:E152V (GAG→GTG)	PA14_RS06025	PA14_15130		hypothetical protein	0	0	0	0	0	0	0.13	-0.16	0	0	0	0	0	0	0	0	0	0	0	0	0	0	0.16	0	0.13	0	0
PA14_RS06025 →:1,283,292:D155V (GAC→GTC)	PA14_RS06025	PA14_15130		hypothetical protein	0	0	0	0	0	0	0	0	0.09	0	0	0	0	0	0	0	0	0	0	0	0	0	0	0	0	0	0.09
PA14_RS06025 →:1,283,299:P157P (CCG→CCC)	PA14_RS06025	PA14_15130		hypothetical protein	0	0	0	0	0	0	0	0.06	0	0	0	0	0	0	0	0	0	0	0	0	0	0	0	0	0	0.06	0
PA14_RS06025 →:1,283,317:F163L (TTC→TTA)	PA14_RS06025	PA14_15130		hypothetical protein	0	0	0	0	0	0	0	-0.1	0	0	0	0	0	0	0	0	0	0	0	0	0	0	0.1	0	0	0	0
PA14_RS06040 ←:1,285,866:L11H (CTC→CAC)	PA14_RS06040	PA14_15160		hypothetical protein	0	0	0	0	0	0	-0.05	0	0	0	0	0	0	0	0	0	0	0	0	0	0	0.05	0	0	0	0	0
PA14_RS06040 ←:1,285,868:V10V (GTT→GTA)	PA14_RS06040	PA14_15160		hypothetical protein	0	0	0	0	0	0	-0.05	0	-0.06	0	0	0	0	0	0	0	0	0	0	0	0	0.05	0	0.06	0	0	0
PA14_RS06260 →:1,328,523:Q171L (CAG→CTG)	PA14_RS06260	PA14_15620		oxidoreductase	0	0	0	-0.08	0	0	0	0	0	0	0	0	0	0	0	0.08	0	0	0	0	0	0	0	0	0	0	0
PA14_RS06310 → / ← PA14_RS06315:1,343,346:intergenic (+104/+98)	PA14_RS06310	PA14_15770		hypothetical protein	0	0	0	0	0	0	0.07	0	0	0	0	0	0	0	0	0	0	0	0	0	0	0	0	0	0.07	0	0
PA14_RS06310 → / ← PA14_RS06315:1,343,382:intergenic (+140/+62)	PA14_RS06310	PA14_15770		hypothetical protein	0	0	0	0.16	0	0	0	0	0	0	0	0	0	0	0	0	0	0	0.16	0	0	0	0	0	0	0	0
PA14_RS06310 → / ← PA14_RS06315:1,343,393:intergenic (+151/+51)	PA14_RS06310	PA14_15770		hypothetical protein	0	0	0	0	0	0	0	0	-0.16	0	0	0	0	0	0	0	0	0	0	0	0	0	0	0.16	0	0	0
PA14_RS06315 ←:1,344,757:F134V (TTC→GTC)	PA14_RS06315	PA14_15780		PTS system N-acetylglucosamine-specific IIBC component	0	0	0	0	0	0	0.11	0	0	0	0	0	0	0	0	0	0	0	0	0	0	0	0	0	0.11	0	0
PA14_RS06325 ←:1,348,063:I229N (ATC→AAC)	PA14_RS06325	PA14_15810		aminotransferase	0	0	0	0	0	0	-0.07	0	0	0	0	0	0	0	0	0	0	0	0	0	0	0.07	0	0	0	0	0
PA14_RS06335 ← / ← PA14_RS06340:1,350,712:intergenic (‑116/+127)	PA14_RS06335	PA14_15830		GntR family transcriptional regulator	0	0	0	0	0	0	0	0	0.07	0	0	0	0	0	0	0	0	0	0	0	0	0	0	0	0	0	0.07
PA14_RS06465 →:1,374,667:V23V (GTG→GTT)	PA14_RS06465	PA14_16140		hypothetical protein	0	0	0	-0.06	0	0	0	0	0	0	0	0	0	0	0	0.06	0	0	0	0	0	0	0	0	0	0	0
PA14_RS06485 →:1,383,847:E1657V (GAG→GTG)	PA14_RS06485	PA14_16190		hypothetical protein	0	0	0	0	0	0	0	-0.14	0	0	0	0	0	0	0	0	0	0	0	0	0	0	0.14	0	0	0	0
PA14_RS06535 →:1,393,354:I309F (ATT→TTT)	PA14_RS06535	PA14_16310		MFS permease	0	0	0	0.07	0	0.06	0	0	0	0	0	0	0	0	0	0	0	0	0.07	0	0.06	0	0	0	0	0	0
PA14_RS06545 →:1,394,344:L12H (CTC→CAC)	PA14_RS06545	PA14_16330		hypothetical protein	0	0	0	0	0	0	0	0.07	0	0	0	0	0	0	0	0	0	0	0	0	0	0	0	0	0	0.07	0
PA14_RS06565 →:1,400,853:R229P (CGC→CCC)	PA14_RS06565	PA14_16370		hypothetical protein	0	0	0	0	0	0.08	0	0.08	0	0	0	0	0	0	0	0	0	0	0	0	0.08	0	0	0	0	0.08	0
PA14_RS06780 →:1,450,178:V215G (GTT→GGT)	PA14_RS06780	PA14_16910		hypothetical protein	0	0	0	0	0.07	0	0	0	0	0	0	0	0	0	0	0	0	0	0	0.07	0	0	0	0	0	0	0
PA14_RS06825 → / ← PA14_RS06830:1,457,928:intergenic (+12/+39)	PA14_RS06825	PA14_17010		Na(+)/H(+) exchanger protein	0	0	0	0	0	0	0	0.1	0	0	0	0	0	0	0	0	0	0	0	0	0	0	0	0	0	0.1	0
PA14_RS06825 → / ← PA14_RS06830:1,457,940:intergenic (+24/+27)	PA14_RS06825	PA14_17010		Na(+)/H(+) exchanger protein	0	0	0	0	0.09	0	-0.1	0	0	0	0	0	0	0	0	0	0	0	0	0.09	0	0.1	0	0	0	0	0
PA14_RS06830 ←:1,458,344:Y278N (TAC→AAC)	PA14_RS06830	PA14_17030		succinyldiaminopimelate transaminase	0	0	0	0	0	0	0	0	-0.06	0	0	0	0	0	0	0	0	0	0	0	0	0	0	0.06	0	0	0
PA14_RS06830 ←:1,459,153:L8H (CTC→CAC)	PA14_RS06830	PA14_17030		succinyldiaminopimelate transaminase	0	0	0	0	0	0	0	0.01	0	0	0	0	0	0	0	0	0	0	0	0	0	0	0.06	0	0	0.07	0
PA14_RS07010 →:1,498,116:G6G (GGA→GGT)	PA14_RS07010	PA14_17470		hypothetical protein	0	0	0	0	0	0	0.05	0	0.05	0	0	0	0	0	0	0	0	0	0	0	0	0	0	0	0.05	0	0.05
PA14_RS07050 ←:1,507,568:I146N (ATC→AAC)	PA14_RS07050	PA14_17550		hypothetical protein	0	0	0	0	0	0	0	0	-0.05	0	0	0	0	0	0	0	0	0	0	0	0	0	0	0.05	0	0	0
PA14_RS07050 ←:1,507,605:E134Q (GAA→CAA)	PA14_RS07050	PA14_17550		hypothetical protein	0	0	0	0	0	0	0.14	0	0	0	0	0	0	0	0	0	0	0	0	0	0	0	0	0	0.14	0	0
PA14_RS07050 ←:1,507,624:G127G (GGC→GGG)	PA14_RS07050	PA14_17550		hypothetical protein	0	0	0	0	0	0.09	0	0	-0.13	0	0	0	0	0	0	0	0	0	0	0	0.09	0	0	0.13	0	0	0
PA14_RS07180 →:1,535,534:L235V (CTG→GTG)	PA14_RS07180	PA14_17880		acetyl-CoA acetyltransferase	0	0	0	-0.06	0	0	0	0	0	0	0	0	0	0	0	0.06	0	0	0	0	0	0	0	0	0	0	0
PA14_RS07265 →:1,553,002:M340L (ATG→TTG)	PA14_RS07265	PA14_18090		major facilitator subfamily transporter protein	0	0	0	0	0	0	0.06	0.06	0.06	0	0	0	0	0	0	0	0	0	0	0	0	0	0	0	0.06	0.06	0.06
PA14_RS07265 →:1,553,022:S346R (AGC→AGG)	PA14_RS07265	PA14_18090		major facilitator subfamily transporter protein	0	0	0	0	0	0	0.11	0	0	0	0	0	0	0	0	0	0	0	0	0	0	0	0	0	0.11	0	0
PA14_RS07270 ←:1,553,190:L53Q (CTG→CAG)	PA14_RS07270	PA14_18100		hypothetical protein	0	0	0	0	0.08	0	0	0	-0.07	0	0	0	0	0	0	0	0	0	0	0.08	0	0	0	0.07	0	0	0
PA14_RS07735 ← / ← PA14_RS07740:1,670,260:intergenic (‑108/+29)	PA14_RS07735	PA14_19340		sensor/response regulator hybrid	0	0	0	0	-0.09	0	0	0	-0.09	0	0	0	0	0	0	0	0.09	0	0	0	0	0	0	0.09	0	0	0
PA14_RS07760 ←:1,676,024:L217Q (CTG→CAG)	PA14_RS07760	PA14_19390		hypothetical protein	0	0	0	0	0	0	0	-0.07	0	0	0	0	0	0	0	0	0	0	0	0	0	0	0.07	0	0	0	0
PA14_RS07870 ←:1,696,391:H92R (CAC→CGC)	PA14_RS07870	PA14_19650		hypothetical protein	0	0	0	0	0	0	0	0	0.05	0	0	0	0	0	0	0	0	0	0	0	0	0	0	0	0	0	0.05
PA14_RS07870 ←:1,696,414:G84G (GGA→GGG)	PA14_RS07870	PA14_19650		hypothetical protein	0	0	0	0	0	0	0	0	0.06	0	0	0	0	0	0	0	0	0	0	0	0	0	0	0	0	0	0.06
PA14_RS07910 →:1,702,095:G67A (GGC→GCC)	PA14_RS07910	PA14_19730		oxidoreductase	0	0	0	0	0	0	0	0	-0.07	0	0	0	0	0	0	0	0	0	0	0	0	0	0	0.07	0	0	0
PA14_RS07925 ← / ← PA14_RS07930:1,705,564:intergenic (‑65/+26)	PA14_RS07925	PA14_19770		hypothetical protein	0	0	0	0	0	0	0	-0.16	0	0	0	0	0	0	0	0	0	0	0	0	0	0	0.16	0	0	0	0
PA14_RS07925 ←:1,704,908:A198P (GCC→CCC)	PA14_RS07925	PA14_19770		hypothetical protein	0	0	0	0	0	0	-0.09	0	0	0	0	0	0	0	0	0	0	0	0	0	0	0.09	0	0	0	0	0
PA14_RS07925 ←:1,704,922:L193R (CTC→CGC)	PA14_RS07925	PA14_19770		hypothetical protein	0	0	0	-0.13	0	0	-0.11	0	0	0	0	0	0	0	0	0.13	0	0	0	0	0	0.11	0	0	0	0	0
PA14_RS07945 →:1,711,057:S369T (AGC→ACC)	PA14_RS07945	PA14_19850		transcriptional regulator	0	0	0	0	0	0	0	0	-0.08	0	0	0	0	0	0	0	0	0	0	0	0	0	0	0.08	0	0	0
PA14_RS08040 →:1,730,905:R150G (CGG→GGG)	PA14_RS08040	PA14_20070		hypothetical protein	0	0	0	0	0	0.05	0	0	0	0	0	0	0	0	0	0	0	0	0	0	0.05	0	0	0	0	0	0
PA14_RS08050 →:1,732,495:E155D (GAA→GAT)	PA14_RS08050	PA14_20100		hypothetical protein	0	0	0	0	0	0	0	0	0.13	0	0	0	0	0	0	0	0	0	0	0	0	0	0	0	0	0	0.13
PA14_RS08240 →:1,765,340:L615H (CTC→CAC)	PA14_RS08240	PA14_20520		hypothetical protein	0	0	0	0	0	0	0	0.09	0	0	0	0	0	0	0	0	0	0	0	0	0	0	0	0	0	0.09	0
PA14_RS08305 → / → PA14_RS08310:1,780,672:intergenic (+54/‑130)	PA14_RS08305	PA14_20670		glutamine synthetase	0	0	0	0.06	0	0	0	0	0	0	0	0	0	0	0	0	0	0	0.06	0	0	0	0	0	0	0	0
PA14_RS08345 → / → PA14_RS08350:1,787,262:intergenic (+23/‑292)	PA14_RS08345	PA14_20760		chemotaxis protein methyltransferase	0	0	0	0	0	0	0.21	0.17	-0.15	0	0	0	0	0	0	0	0	0	0	0	0	0	0	0.15	0.21	0.17	0
PA14_RS08345 → / → PA14_RS08350:1,787,268:intergenic (+29/‑286)	PA14_RS08345	PA14_20760		chemotaxis protein methyltransferase	0	0	0	0	0	0	-0.15	0	0.11	0	0	0	0	0	0	0	0	0	0	0	0	0.15	0	0	0	0	0.11
PA14_RS08345 → / → PA14_RS08350:1,787,271:intergenic (+32/‑283)	PA14_RS08345	PA14_20760		chemotaxis protein methyltransferase	0	0	0	0	0	0	-0.13	0	-0.17	0	0	0	0	0	0	0	0	0	0	0	0	0.13	0	0.17	0	0	0
PA14_RS08345 → / → PA14_RS08350:1,787,282:intergenic (+43/‑272)	PA14_RS08345	PA14_20760		chemotaxis protein methyltransferase	0	0	0	0	0.2	0	0	0	0	0	0	0	0	0	0	0	0	0	0	0.2	0	0	0	0	0	0	0
PA14_RS08385 →:1,796,456:A330G (GCG→GGG)	PA14_RS08385	PA14_20860		Tfp pilus assembly protein FimV	0	0	0	0.06	0	0	0	0	0	0	0	0	0	0	0	0	0	0	0.06	0	0	0	0	0	0	0	0
PA14_RS08405 ←:1,801,490:A281G (GCC→GGC)	PA14_RS08405	PA14_20900		MFS transporter	0	0	0	0	0	0	0.06	0	0	0	0	0	0	0	0	0	0	0	0	0	0	0	0	0	0.06	0	0
PA14_RS08405 ←:1,801,524:F270V (TTC→GTC)	PA14_RS08405	PA14_20900		MFS transporter	0	0	0	0	0	0	0	0	0.05	0	0	0	0	0	0	0	0	0	0	0	0	0	0	0	0	0	0.05
PA14_RS08450 ←:1,814,384:I764M (ATC→ATG) ‡	PA14_RS08450	PA14_21020		non-ribosomal peptide synthetase	0	0	0	0	-0.19	0	0	0	0	0	0	0	0	0	0	0	0.19	0	0	0	0	0	0	0	0	0	0
PA14_RS08450 ←:1,814,385:I764S (ATC→AGC) ‡	PA14_RS08450	PA14_21020		non-ribosomal peptide synthetase	0	0	0	0	-0.14	0	0	0	0	0	0	0	0	0	0	0	0.14	0	0	0	0	0	0	0	0	0	0
PA14_RS08450 ←:1,814,386:I764F (ATC→TTC)	PA14_RS08450	PA14_21020		non-ribosomal peptide synthetase	0	0	0	0.16	0	0	0	0	-0.18	0	0	0	0	0	0	0	0	0	0.16	0	0	0	0	0.18	0	0	0
PA14_RS08455 → / ← PA14_RS08460:1,818,070:intergenic (+308/+37)	PA14_RS08455	PA14_21030		ATP-dependent Clp protease proteolytic subunit	0	0	0	-1	0	0	0	0	0	0	0	0	0	0	0	1	0	0	0	0	0	0	0	0	0	0	0
PA14_RS08495 ← / ← PA14_RS08500:1,827,129:intergenic (‑17/+49)	PA14_RS08495	PA14_21120		hypothetical protein	0	0	0	0	0	0.06	0	0	0	0	0	0	0	0	0	0	0	0	0	0	0.06	0	0	0	0	0	0
PA14_RS08510 ←:1,829,165:L150R (CTG→CGG)	PA14_RS08510	PA14_21150		ABC transporter permease	0	0	0	0.11	0	0.09	0.01	-0.11	0	0	0	0	0	0	0	0	0	0	0.11	0	0.09	0.11	0.11	0	0.12	0	0
PA14_RS08510 ←:1,829,187:L143V (CTG→GTG)	PA14_RS08510	PA14_21150		ABC transporter permease	0	0	0	0	0	0	0.06	0	0	0	0	0	0	0	0	0	0	0	0	0	0	0.08	0	0	0.14	0	0
PA14_RS08515 ←:1,830,374:A13P (GCC→CCC)	PA14_RS08515	PA14_21160		ABC transporter ATP-binding protein	0	0	0	0	0	0	0.09	0	0	0	0	0	0	0	0	0	0	0	0	0	0	0	0	0	0.09	0	0
PA14_RS08650 ←:1,866,006:G57D (GGC→GAC)	PA14_RS08650	PA14_21510		hypothetical protein	0	0	0	0	0	0	-0.05	0	0	0	0	0	0	0	0	0	0	0	0	0	0	0.05	0	0	0	0	0
PA14_RS08825 →:1,900,084:K87* (AAA→TAA)	PA14_RS08825	PA14_21860		hypothetical protein	0	0	0	0	0	0	0	-0.09	0	0	0	0	0	0	0	0	0	0	0	0	0	0	0.09	0	0	0	0
PA14_RS08825 →:1,900,093:Y90N (TAC→AAC)	PA14_RS08825	PA14_21860		hypothetical protein	0	0	0	0	0.08	0	0	0	0	0	0	0	0	0	0	0	0	0	0	0.08	0	0	0	0	0	0	0
PA14_RS08825 →:1,900,130:R102P (CGG→CCG)	PA14_RS08825	PA14_21860		hypothetical protein	0	0	0	0	0	0	0	-0.1	0	0	0	0	0	0	0	0	0	0	0	0	0	0	0.1	0	0	0	0
PA14_RS08825 →:1,900,135:A104P (GCG→CCG)	PA14_RS08825	PA14_21860		hypothetical protein	0	0	0	0.12	0	0	-0.05	0	-0.1	0	0	0	0	0	0	0	0	0	0.12	0	0	0.05	0	0.1	0	0	0
PA14_RS08825 →:1,900,141:D106H (GAC→CAC)	PA14_RS08825	PA14_21860		hypothetical protein	0	0	0	0.07	0	-0.06	0	-0.03	0	0	0	0	0	0	0	0	0	0.06	0.07	0	0	0	0.09	0	0	0.06	0
PA14_RS08825 →:1,900,144:A107P (GCG→CCG)	PA14_RS08825	PA14_21860		hypothetical protein	0	0	0	0	0	0.1	0	-0.04	0	0	0	0	0	0	0	0	0	0	0	0	0.1	0	0.13	0	0	0.09	0
PA14_RS08825 →:1,900,153:A110P (GCC→CCC)	PA14_RS08825	PA14_21860		hypothetical protein	0	0	0	0	0	0	-0.06	0.03	-0.07	0	0	0	0	0	0	0	0	0	0	0	0	0.06	0.07	0.07	0	0.1	0
PA14_RS08860 ←:1,907,937:A251A (GCG→GCC)	PA14_RS08860	PA14_21930		ABC transporter permease	0	0	0	0	0	-0.06	0	0	0	0	0	0	0	0	0	0	0	0.06	0	0	0	0	0	0	0	0	0
PA14_RS08860 ←:1,907,947:M248R (ATG→AGG)	PA14_RS08860	PA14_21930		ABC transporter permease	0	0	0	0	0	0	0.15	0	0	0	0	0	0	0	0	0	0	0	0	0	0	0	0	0	0.15	0	0
PA14_RS08865 ← / ← PA14_RS08870:1,909,537:intergenic (‑42/+13)	PA14_RS08865	PA14_21940		hypothetical protein	0	0	0	0	0	-0.09	0	0	0	0	0	0	0	0	0	0	0	0.09	0	0	0	0	0	0	0	0	0
PA14_RS08870 ←:1,909,584:Q342L (CAG→CTG)	PA14_RS08870	PA14_21960		hypothetical protein	0	0	0	0	0	0	-0.06	0	0	0	0	0	0	0	0	0	0	0	0	0	0	0.06	0	0	0	0	0
PA14_RS08935 ← / ← PA14_RS08940:1,922,961:intergenic (‑266/+71)	PA14_RS08935	PA14_22080		resolvase	0	0	0	0	0	0	0	0	-0.08	0	0	0	0	0	0	0	0	0	0	0	0	0	0	0.08	0	0	0
PA14_RS08935 ← / ← PA14_RS08940:1,922,980:intergenic (‑285/+52)	PA14_RS08935	PA14_22080		resolvase	0	0	0	0	0	0	0.05	0	0	0	0	0	0	0	0	0	0	0	0	0	0	0	0	0	0.05	0	0
PA14_RS09040 → / → PA14_RS09045:1,945,518:intergenic (+110/‑108)	PA14_RS09040	PA14_22330		glycine betaine-binding protein	0	0	0	0	0	0	0	0	-0.05	0	0	0	0	0	0	0	0	0	0	0	0	0	0	0.05	0	0	0
PA14_RS09055 →:1,949,330:Q551L (CAG→CTG)	PA14_RS09055	PA14_22370		hypothetical protein	0	0	0	0	-0.12	0	0	0	0	0	0	0	0	0	0	0	0.12	0	0	0	0	0	0	0	0	0	0
PA14_RS09065 → / → PA14_RS09070:1,950,431:intergenic (+63/‑214)	PA14_RS09065	PA14_22400		hypothetical protein	0	0	0	0	0	0	0	0	-0.1	0	0	0	0	0	0	0	0	0	0	0	0	0	0	0.1	0	0	0
PA14_RS09180 ←:1,970,485:P45P (CCT→CCA)	PA14_RS09180	PA14_22650		ABC transporter	0	0	0	0	0	0	0	0	-0.11	0	0	0	0	0	0	0	0	0	0	0	0	0	0	0.11	0	0	0
PA14_RS09185 ←:1,970,956:Q200L (CAG→CTG)	PA14_RS09185	PA14_22660		hypothetical protein	0	0	0	0	0	0	0.05	0	0	0	0	0	0	0	0	0	0	0	0	0	0	0	0	0	0.05	0	0
PA14_RS09270 → / → PA14_RS09275:1,985,226:intergenic (+15/‑100)	PA14_RS09270	PA14_22870		hypothetical protein	0	0	0	0	0	0	0	-0.06	0	0	0	0	0	0	0	0	0	0	0	0	0	0	0.06	0	0	0	0
PA14_RS09305 → / → PA14_RS09310:1,993,582:intergenic (+14/‑87)	PA14_RS09305	PA14_22980		sugar ABC transporter substrate-binding protein	0	0	0	0	0	0	-0.01	0	-0.09	0	0	0	0	0	0	0	0	0	0	0	0	0.1	0	0.09	0.09	0	0
PA14_RS09480 →:2,032,471:L190F (TTA→TTT)	PA14_RS09480	PA14_23400		hypothetical protein	0	0	0	0	0	0	-0.07	0	-0.05	0	0	0	0	0	0	0	0	0	0	0	0	0.07	0	0.05	0	0	0
PA14_RS09480 →:2,032,493:A198S (GCT→TCT)	PA14_RS09480	PA14_23400		hypothetical protein	0	0	0	0.07	0	0	0	0	0	0	0	0	0	0	0	0	0	0	0.07	0	0	0	0	0	0	0	0
PA14_RS09480 →:2,032,507:M202I (ATG→ATT)	PA14_RS09480	PA14_23400		hypothetical protein	0	0	0	0	0	0	0.14	0	0	0	0	0	0	0	0	0	0	0	0	0	0	0	0	0	0.14	0	0
PA14_RS09480 →:2,032,513:L204F (TTG→TTT)	PA14_RS09480	PA14_23400		hypothetical protein	0	0	0	0.17	0.21	0	0	0	0.15	0	0	0	0	0	0	0	0	0	0.17	0.21	0	0	0	0	0	0	0.15
PA14_RS09580 → / → PA14_RS09585:2,056,381:intergenic (+50/‑43)	PA14_RS09580	PA14_23630		hypothetical protein	0	0	0	0	0	0	0	-0.15	0.01	0	0	0	0	0	0	0	0	0	0	0	0	0	0.15	0.12	0	0	0.13
PA14_RS09580 → / → PA14_RS09585:2,056,389:intergenic (+58/‑35)	PA14_RS09580	PA14_23630		hypothetical protein	0	0	0	0	0	0	-0.07	0	0	0	0	0	0	0	0	0	0	0	0	0	0	0.07	0	0	0	0	0
PA14_RS09605 ←:2,059,680:V422L (GTC→CTC)	PA14_RS09605	PA14_23690		secreted protein	0	0	0	0	0	0	0	0	-0.07	0	0	0	0	0	0	0	0	0	0	0	0	0	0	0.07	0	0	0
PA14_RS09605 ←:2,059,724:S407T (AGC→ACC)	PA14_RS09605	PA14_23690		secreted protein	0	0	0	0	0	0	0	-0.09	0	0	0	0	0	0	0	0	0	0	0	0	0	0	0.09	0	0	0	0
PA14_RS09605 ←:2,059,725:S407R (AGC→CGC)	PA14_RS09605	PA14_23690		secreted protein	0	0	0	0	0	-0.07	0	0	0	0	0	0	0	0	0	0	0	0.07	0	0	0	0	0	0	0	0	0
PA14_RS09775 ←:2,094,022:E46Q (GAA→CAA)	PA14_RS09775	PA14_24140		AraC family transcriptional regulator	0	0	0	0	0	0	0	0.12	0	0	0	0	0	0	0	0	0	0	0	0	0	0	0	0	0	0.12	0
PA14_RS09790 →:2,098,053:Y64F (TAT→TTT)	PA14_RS09790	PA14_24180		hypothetical protein	0	0	0	0	0	0	0	-0.06	0	0	0	0	0	0	0	0	0	0	0	0	0	0	0.06	0	0	0	0
PA14_RS09840 → / → PA14_RS09845:2,111,769:intergenic (+22/‑158)	PA14_RS09840	PA14_24300		hypothetical protein	0	0	0	0	0	0	0.06	0	0	0	0	0	0	0	0	0	0	0	0	0	0	0	0	0	0.06	0	0
PA14_RS09850 → / ← PA14_RS09855:2,115,475:intergenic (+58/+14)	PA14_RS09850	PA14_24330		hypothetical protein	0	0	0	0	0	0	0	-0.15	0	0	0	0	0	0	0	0	0	0	0	0	0	0	0.15	0	0	0	0
PA14_RS09870 ←:2,121,299:N163T (AAC→ACC)	PA14_RS09870	PA14_24370		hypothetical protein	0	0	0	0.08	0	0	0	0	0.08	0	0	0	0	0	0	0	0	0	0.08	0	0	0	0	0	0	0	0.08
PA14_RS09950 ←:2,147,736:E67* (GAA→TAA)	PA14_RS09950	PA14_24570		hypothetical protein	0	0	0	0	0	0	-0.07	0	0	0	0	0	0	0	0	0	0	0	0	0	0	0.07	0	0	0	0	0
PA14_RS10495 → / ← PA14_RS10500:2,260,014:intergenic (+64/+9)	PA14_RS10495	PA14_25900		fabV	0	0	0	0	0	0	0.11	0	0.11	0	0	0	0	0	0	0	0	0	0	0	0	0	0	0	0.11	0	0.11
PA14_RS10540 →:2,271,379:Q313L (CAG→CTG)	PA14_RS10540	PA14_25990		magnesium chelatase	0	0	0	0	0	0	0.07	0	0	0	0	0	0	0	0	0	0	0	0	0	0	0	0	0	0.07	0	0
PA14_RS10650 ←:2,291,666:S94T (AGC→ACC)	PA14_RS10650	PA14_26260		hydrolase	0	0	0	-0.1	-0.05	0	0	0.04	0	0	0	0	0	0	0	0.1	0.05	0	0	0	0	0	0.06	0	0	0.1	0
PA14_RS10695 ←:2,299,855:E226A (GAG→GCG)	PA14_RS10695	PA14_26390		hypothetical protein	0	0	0	0	0	0	-0.12	0	0	0	0	0	0	0	0	0	0	0	0	0	0	0.12	0	0	0	0	0
PA14_RS10790 →:2,320,113:L129R (CTG→CGG)	PA14_RS10790	PA14_26620		hypothetical protein	0	0	0	0	0	0	0	-0.12	0	0	0	0	0	0	0	0	0	0	0	0	0	0	0.12	0	0	0	0
PA14_RS10790 →:2,320,130:Q135E (CAG→GAG)	PA14_RS10790	PA14_26620		hypothetical protein	0	0	0	0	-0.09	0	0	0	0	0	0	0	0	0	0	0	0.09	0	0	0	0	0	0	0	0	0	0
PA14_RS10925 ←:2,348,917:Q286P (CAG→CCG)	PA14_RS10925	PA14_27000		chemotaxis transducer	0	0	0	0	0	0	0.08	-0.06	0	0	0	0	0	0	0	0	0	0	0	0	0	0	0.06	0	0.08	0	0
PA14_RS10925 ←:2,348,920:G285A (GGC→GCC)	PA14_RS10925	PA14_27000		chemotaxis transducer	0	0	0	0	0	0	0	-0.1	0	0	0	0	0	0	0	0	0	0	0	0	0	0	0.1	0	0	0	0
PA14_RS10925 ←:2,348,924:A284P (GCC→CCC)	PA14_RS10925	PA14_27000		chemotaxis transducer	0	0	0	0	0	-0.07	0	0	0	0	0	0	0	0	0	0	0	0.07	0	0	0	0	0	0	0	0	0
PA14_RS11050 ← / → PA14_RS11055:2,371,849:intergenic (‑108/‑68)	PA14_RS11050	PA14_27330		phospho-2-dehydro-3-deoxyheptonate aldolase	0	0	0	0	0	0	-0.08	0	0	0	0	0	0	0	0	0	0	0	0	0	0	0.08	0	0	0	0	0
PA14_RS11050 ←:2,371,596:L49R (CTG→CGG)	PA14_RS11050	PA14_27330		phospho-2-dehydro-3-deoxyheptonate aldolase	0	0	0	0	0	0.12	0	0	0	0	0	0	0	0	0	0	0	0	0	0	0.12	0	0	0	0	0	0
PA14_RS11120 ← / ← PA14_RS11125:2,387,008:intergenic (‑25/+26)	PA14_RS11120	PA14_27490		hypothetical protein	0	0	0	0	0	0	0	0	-0.14	0	0	0	0	0	0	0	0	0	0	0	0	0	0	0.14	0	0	0
PA14_RS11120 ← / ← PA14_RS11125:2,387,013:intergenic (‑30/+21)	PA14_RS11120	PA14_27490		hypothetical protein	0	0	0	0	0	0	0.1	0	0	0	0	0	0	0	0	0	0	0	0	0	0	0	0	0	0.1	0	0
PA14_RS11120 ← / ← PA14_RS11125:2,387,017:intergenic (‑34/+17)	PA14_RS11120	PA14_27490		hypothetical protein	0	0	0	0	0.16	-0.14	0	-0.03	0.05	0	0	0	0	0	0	0	0	0.14	0	0.16	0	0	0.21	0.14	0	0.18	0.19
PA14_RS11150 →:2,392,619:A82G (GCC→GGC)	PA14_RS11150	PA14_27560		hypothetical protein	0	0	0	0	0	0	0	0	0.1	0	0	0	0	0	0	0	0	0	0	0	0	0	0	0	0	0	0.1
PA14_RS11150 →:2,392,645:L91V (CTC→GTC)	PA14_RS11150	PA14_27560		hypothetical protein	0	0	0	0	0	-0.07	0	0.13	-0.11	0	0	0	0	0	0	0	0	0.07	0	0	0	0	0	0.11	0	0.13	0
PA14_RS11150 →:2,392,647:L91L (CTC→CTG)	PA14_RS11150	PA14_27560		hypothetical protein	0	0	0	0	-0.08	0	-0.06	-0.07	0	0	0	0	0	0	0	0	0.08	0	0	0	0	0.06	0.07	0	0	0	0
PA14_RS11150 →:2,392,648:W92G (TGG→GGG)	PA14_RS11150	PA14_27560		hypothetical protein	0	0	0	0	0	0	0.06	0	0	0	0	0	0	0	0	0	0	0	0	0	0	0	0	0	0.06	0	0
PA14_RS11150 →:2,392,655:A94G (GCC→GGC)	PA14_RS11150	PA14_27560		hypothetical protein	0	0	0	0	0	0	-0.04	0	0	0	0	0	0	0	0	0	0	0	0	0	0	0.19	0	0	0.15	0	0
PA14_RS11150 →:2,392,678:L102V (CTG→GTG)	PA14_RS11150	PA14_27560		hypothetical protein	0	0	0	0	0	0	0.09	0.08	-0.09	0	0	0	0	0	0	0	0	0	0	0	0	0	0	0.09	0.09	0.08	0
PA14_RS11150 →:2,392,700:E109A (GAG→GCG)	PA14_RS11150	PA14_27560		hypothetical protein	0	0	0	0	0	0	0.08	0	0	0	0	0	0	0	0	0	0	0	0	0	0	0	0	0	0.08	0	0
PA14_RS11150 →:2,392,703:L110R (CTG→CGG)	PA14_RS11150	PA14_27560		hypothetical protein	0	0	0	0	0	0	0.13	0.11	0	0	0	0	0	0	0	0	0	0	0	0	0	0	0	0	0.13	0.11	0
PA14_RS11190 ← / ← PA14_RS11195:2,396,764:intergenic (‑69/+82)	PA14_RS11190	PA14_27640		protein associated with synthesis and assembly of refractile inclusion bodies	0	0	0	0	0	0	-0.05	0	0	0	0	0	0	0	0	0	0	0	0	0	0	0.05	0	0	0	0	0
PA14_RS11190 ← / ← PA14_RS11195:2,396,783:intergenic (‑88/+63)	PA14_RS11190	PA14_27640		protein associated with synthesis and assembly of refractile inclusion bodies	0	0	0	0	0	0	0	-0.06	0	0	0	0	0	0	0	0	0	0	0	0	0	0	0.06	0	0	0	0
PA14_RS11365 →:2,425,887:L89R (CTT→CGT)	PA14_RS11365	PA14_28020		hypothetical protein	0	0	0	0	-0.03	0	0	0.07	0	0	0	0	0	0	0	0	0.08	0	0	0.05	0	0	0	0	0	0.07	0
PA14_RS11430 →:2,437,315:P2P (CCC→CCT)	PA14_RS11430	PA14_28150		hypothetical protein	0	0	0	0	0	0.05	0	0	0	0	0	0	0	0	0	0	0	0	0	0	0.05	0	0	0	0	0	0
PA14_RS11650 ←:2,465,334:R57P (CGC→CCC)	PA14_RS11650	PA14_28610		hypothetical protein	0	0	0	0.05	0	0	0	0	0	0	0	0	0	0	0	0	0	0	0.05	0	0	0	0	0	0	0	0
PA14_RS11660 →:2,466,668:R188L (CGA→CTA)	PA14_RS11660	PA14_28630		hydrolase	0	0	0	0	0	0	0.09	0	0	0	0	0	0	0	0	0	0	0	0	0	0	0	0	0	0.09	0	0
PA14_RS11745 →:2,491,209:coding (1807/2211 nt)	PA14_RS11745	PA14_28840		helicase	0	0	0	0	0	0	0	0	0.05	0	0	0	0	0	0	0	0	0	0	0	0	0	0	0	0	0	0.05
PA14_RS11745 →:2,491,210:coding (1808/2211 nt)	PA14_RS11745	PA14_28840		helicase	0	0	0	0	0	0	0	0	0.05	0	0	0	0	0	0	0	0	0	0	0	0	0	0	0	0	0	0.05
PA14_RS11745 →:2,491,211:coding (1809/2211 nt)	PA14_RS11745	PA14_28840		helicase	0	0	0	0	0	0	0	0	0.05	0	0	0	0	0	0	0	0	0	0	0	0	0	0	0	0	0	0.05
PA14_RS11745 →:2,491,212:coding (1810/2211 nt)	PA14_RS11745	PA14_28840		helicase	0	0	0	0	0	0	0	0	0.05	0	0	0	0	0	0	0	0	0	0	0	0	0	0	0	0	0	0.05
PA14_RS11765 ←:2,494,369:G1956A (GGC→GCC)	PA14_RS11765	PA14_28895		hypothetical protein	0	0	0	0	0	0.06	0	0.02	0	0	0	0	0	0	0	0	0	0	0	0	0.06	0	0.07	0	0	0.09	0
PA14_RS11780 ←:2,502,998:D132V (GAT→GTT)	PA14_RS11780	PA14_28930		hypothetical protein	0	0	0	0	0	0	-0.06	0	0	0	0	0	0	0	0	0	0	0	0	0	0	0.06	0	0	0	0	0
PA14_RS11780 ←:2,503,024:P123P (CCG→CCC)	PA14_RS11780	PA14_28930		hypothetical protein	0	0	0	0	0	0	-0.06	0.05	0.06	0	0	0	0	0	0	0	0	0	0	0	0	0.06	0	0	0	0.05	0.06
PA14_RS11780 ←:2,503,080:M105L (ATG→TTG)	PA14_RS11780	PA14_28930		hypothetical protein	0	0	0	0	0	0.07	0	0	-0.1	0	0	0	0	0	0	0	0	0	0	0	0.07	0	0	0.1	0	0	0
PA14_RS11920 → / → PA14_RS11925:2,531,327:intergenic (+38/‑19)	PA14_RS11920	PA14_29240		hydrolase	0	0	0	-0.07	0	0	0	0	0	0	0	0	0	0	0	0.07	0	0	0	0	0	0	0	0	0	0	0
PA14_RS11925 →:2,531,349:K2* (AAG→TAG)	PA14_RS11925	PA14_29250		hypothetical protein	0	0	0	0	-0.06	0	0	0	0	0	0	0	0	0	0	0	0.06	0	0	0	0	0	0	0	0	0	0
PA14_RS11945 ←:2,534,530:S105C (AGT→TGT)	PA14_RS11945	PA14_29290		hypothetical protein	0	0	0	0	0	0	-0.08	0	-0.09	0	0	0	0	0	0	0	0	0	0	0	0	0.08	0	0.09	0	0	0
PA14_RS11955 →:2,536,371:I189M (ATC→ATG)	PA14_RS11955	PA14_29320		NADH dehydrogenase, FAD-containing subunit	0	0	0	0	0	0	0	0	-0.05	0	0	0	0	0	0	0	0	0	0	0	0	0	0	0.05	0	0	0
PA14_RS11955 →:2,536,422:S206R (AGC→AGG)	PA14_RS11955	PA14_29320		NADH dehydrogenase, FAD-containing subunit	0	0	0	0	-0.05	0	0	0	0	0	0	0	0	0	0	0	0.05	0	0	0	0	0	0	0	0	0	0
PA14_RS11955 →:2,536,436:E211A (GAG→GCG)	PA14_RS11955	PA14_29320		NADH dehydrogenase, FAD-containing subunit	0	0	0	0.08	0	0	-0.1	0	0	0	0	0	0	0	0	0	0	0	0.08	0	0	0.1	0	0	0	0	0
PA14_RS11990 →:2,547,366:A389T (GCC→ACC)	PA14_RS11990	PA14_29400		hypothetical protein	0	0	0	0	0	-0.05	0	0	0	0	0	0	0	0	0	0	0	0.05	0	0	0	0	0	0	0	0	0
PA14_RS11990 →:2,550,032:A1277A (GCG→GCC)	PA14_RS11990	PA14_29400		hypothetical protein	0	0	0	0	0	0	-0.09	0.1	0	0	0	0	0	0	0	0	0	0	0	0	0	0.09	0	0	0	0.1	0
PA14_RS12015 ←:2,554,758:A23A (GCG→GCC)	PA14_RS12015	PA14_29460		quinone oxidoreductase	0	0	0	0	0	0	0	0	0.29	0	0	0	0	0	0	0	0	0	0	0	0	0	0	0	0	0	0.29
PA14_RS12115 ←:2,571,813:pseudogene (137/816 nt)	PA14_RS12115	PA14_29680		hypothetical protein	0	0	0	0	0	0	-0.05	0	0	0	0	0	0	0	0	0	0	0	0	0	0	0.05	0	0	0	0	0
PA14_RS12245 ← / ← PA14_RS12250:2,602,530:intergenic (‑152/+28)	PA14_RS12245	PA14_30040		hypothetical protein	0	0	0	0	-0.07	0	0	0.07	0	0	0	0	0	0	0	0	0.07	0	0	0	0	0	0	0	0	0.07	0
PA14_RS12370 ←:2,629,936:E313A (GAA→GCA)	PA14_RS12370	PA14_30350		hypothetical protein	0	0	0	0	0	0	0	0.11	0	0	0	0	0	0	0	0	0	0	0	0	0	0	0	0	0	0.11	0
PA14_RS12370 ←:2,629,949:A309P (GCG→CCG)	PA14_RS12370	PA14_30350		hypothetical protein	0	0	0	0	0	0	0	0	-0.09	0	0	0	0	0	0	0	0	0	0	0	0	0	0	0.09	0	0	0
PA14_RS12370 ←:2,629,952:R308G (CGC→GGC)	PA14_RS12370	PA14_30350		hypothetical protein	0	0	0	-0.15	0	0	0	-0.16	0	0	0	0	0	0	0	0.15	0	0	0	0	0	0	0.16	0	0	0	0
PA14_RS12410 ←:2,635,420:I209N (ATC→AAC)	PA14_RS12410	PA14_30430		thiosulfate sulfurtransferase	0	0	0	0	0.1	0	-0.05	0	0	0	0	0	0	0	0	0	0	0	0	0.1	0	0.05	0	0	0	0	0
PA14_RS12455 →:2,644,945:S155R (AGC→CGC)	PA14_RS12455	PA14_30550		periplasmic aliphatic sulfonate-binding protein	0	0	0	-0.13	0	-0.09	-0.05	0	0.02	0	0	0	0	0	0	0.13	0	0.09	0	0	0	0.05	0	0.08	0	0	0.1
PA14_RS12455 →:2,644,946:S155T (AGC→ACC)	PA14_RS12455	PA14_30550		periplasmic aliphatic sulfonate-binding protein	0	0	0	0	0	0	0	0.12	0	0	0	0	0	0	0	0	0	0	0	0	0	0	0	0	0	0.12	0
PA14_RS12660 ← / ← PA14_RS12665:2,692,096:intergenic (‑156/+31)	PA14_RS12660	PA14_30970		transcriptional regulator	0	0	0	0	0	0	-0.18	0	0	0	0	0	0	0	0	0	0	0	0	0	0	0.18	0	0	0	0	0
PA14_RS12680 ←:2,696,638:G135A (GGC→GCC)	PA14_RS12680	PA14_31010		cation efflux system protein	0	0	0	0	0	0	-0.23	0	0	0	0	0	0	0	0	0	0	0	0	0	0	0.23	0	0	0	0	0
PA14_RS12705 ← / ← PA14_RS12710:2,703,307:intergenic (‑152/+297)	PA14_RS12705	PA14_31070		hypothetical protein	0	0	0	0	0	0	0	-0.06	0	0	0	0	0	0	0	0	0	0	0	0	0	0	0.06	0	0	0	0
PA14_RS12705 ← / ← PA14_RS12710:2,703,310:intergenic (‑155/+294)	PA14_RS12705	PA14_31070		hypothetical protein	0	0	0	0	0	0	0	0.06	0	0	0	0	0	0	0	0	0	0	0	0	0	0	0	0	0	0.06	0
PA14_RS12705 ← / ← PA14_RS12710:2,703,326:intergenic (‑171/+278)	PA14_RS12705	PA14_31070		hypothetical protein	0	0	0	0	0	0	0	-0.07	0	0	0	0	0	0	0	0	0	0	0	0	0	0	0.07	0	0	0	0
PA14_RS12705 ← / ← PA14_RS12710:2,703,350:intergenic (‑195/+254)	PA14_RS12705	PA14_31070		hypothetical protein	0	0	0	0	0	0	-0.08	0	0	0	0	0	0	0	0	0	0	0	0	0	0	0.08	0	0	0	0	0
PA14_RS12705 ← / ← PA14_RS12710:2,703,366:intergenic (‑211/+238)	PA14_RS12705	PA14_31070		hypothetical protein	0	0	0	0	0	0	0	0.11	0	0	0	0	0	0	0	0	0	0	0	0	0	0	0	0	0	0.11	0
PA14_RS12705 ← / ← PA14_RS12710:2,703,386:intergenic (‑231/+218)	PA14_RS12705	PA14_31070		hypothetical protein	0	0	0	0	0	0	0	-0.15	0.15	0	0	0	0	0	0	0	0	0	0	0	0	0	0.15	0	0	0	0.15
PA14_RS12705 ← / ← PA14_RS12710:2,703,393:intergenic (‑238/+211)	PA14_RS12705	PA14_31070		hypothetical protein	0	0	0	0	0	0	0	-0.11	0	0	0	0	0	0	0	0	0	0	0	0	0	0	0.11	0	0	0	0
PA14_RS12705 ←:2,702,155:M334R (ATG→AGG)	PA14_RS12705	PA14_31070		hypothetical protein	0	0	0	0.07	0	0	0	0	0	0	0	0	0	0	0	0	0	0	0.07	0	0	0	0	0	0	0	0
PA14_RS12705 ←:2,702,920:M79K (ATG→AAG)	PA14_RS12705	PA14_31070		hypothetical protein	0	0	0	0	0	0.02	-0.13	0	0	0	0	0	0	0	0	0	0	0.08	0	0	0.1	0.13	0	0	0	0	0
PA14_RS12750 → / ← PA14_RS12755:2,709,551:intergenic (+368/+26)	PA14_RS12750	PA14_31160		hypothetical protein	0	0	0	0	0	0	0	0	-0.12	0	0	0	0	0	0	0	0	0	0	0	0	0	0	0.12	0	0	0
PA14_RS12840 →:2,726,663:C221W (TGC→TGG)	PA14_RS12840	PA14_31350		hypothetical protein	0	0	0	0	0	0	0	0	-0.06	0	0	0	0	0	0	0	0	0	0	0	0	0	0	0.06	0	0	0
PA14_RS12860 → / ← PA14_RS12865:2,730,681:intergenic (+19/+95)	PA14_RS12860	PA14_31390		hypothetical protein	0	0	0	0	0	1	1	0	0	1	1	1	1	1	1	1	1	0	1	1	1	0	1	1	1	1	1
PA14_RS12860 → / ← PA14_RS12865:2,730,681:intergenic (+19/+96)	PA14_RS12860	PA14_31390		hypothetical protein	0	0	0	0	0	-1	-1	0	0	0	0	0	0	0	0	0	0	1	0	0	0	1	0	0	0	0	0
PA14_RS12860 → / ← PA14_RS12865:2,730,682:intergenic (+20/+95)	PA14_RS12860	PA14_31390		hypothetical protein	0	0	0	0	0	-0.9	-0.88	0	0	0	0	0	0	0	0	0	0	0.9	0	0	0	0.88	0	0	0	0	0
PA14_RS12860 → / ← PA14_RS12865:2,730,693:intergenic (+31/+84)	PA14_RS12860	PA14_31390		hypothetical protein	0	0	0	0	0	0	-0.07	0	0	0	0	0	0	0	0	0	0	0	0	0	0	0.07	0	0	0	0	0
PA14_RS12940 ←:2,747,151:R422G (CGC→GGC)	PA14_RS12940	PA14_31620		hypothetical protein	0	0	0	0	0	-0.06	0	0	0	0	0	0	0	0	0	0	0	0.06	0	0	0	0	0	0	0	0	0
PA14_RS12970 →:2,754,130:T190T (ACG→ACC)	PA14_RS12970	PA14_31690		hypothetical protein	0	0	0	0	0	0	0	-0.1	0	0	0	0	0	0	0	0	0	0	0	0	0	0	0.1	0	0	0	0
PA14_RS12980 →:2,758,101:E6* (GAA→TAA)	PA14_RS12980	PA14_31720		hypothetical protein	0	0	0	0	0	0	0	0.05	0	0	0	0	0	0	0	0	0	0	0	0	0	0	0	0	0	0.05	0
PA14_RS13005 ←:2,763,688:N239Y (AAC→TAC)	PA14_RS13005	PA14_31770		oxidoreductase	0	0	0	0	0	0	0.08	0	0	0	0	0	0	0	0	0	0	0	0	0	0	0	0	0	0.08	0	0
PA14_RS13025 ← / ← PA14_RS13030:2,769,019:intergenic (‑176/+21)	PA14_RS13025	PA14_31820		aminotransferase	0	0	0	1	0	0	0	1	0	0	0	0	0	0	0	0	0	0	1	0	0	0	0	0	0	1	0
PA14_RS13025 ← / ← PA14_RS13030:2,769,022:intergenic (‑179/+18)	PA14_RS13025	PA14_31820		aminotransferase	0	0	0	1	0	0	0	0	0	0	0	0	0	0	0	0	0	0	1	0	0	0	0	0	0	0	0
PA14_RS13030 ←:2,770,100:L89Q (CTG→CAG)	PA14_RS13030	PA14_31840		hypothetical protein	0	0	0	0	0	0	0	-0.09	0	0	0	0	0	0	0	0	0	0	0	0	0	0	0.09	0	0	0	0
PA14_RS13035 ←:2,771,181:G206G (GGC→GGG)	PA14_RS13035	PA14_31850		hypothetical protein	0	0	0	0	0	-0.1	0	0	0	0	0	0	0	0	0	0	0	0.1	0	0	0	0	0	0	0	0	0
PA14_RS13155 ← / → PA14_RS13160:2,803,419:intergenic (‑355/‑8)	PA14_RS13155	PA14_32250		hypothetical protein	0	0	0	0	0	-0.05	0	0	0	0	0	0	0	0	0	0	0	0.05	0	0	0	0	0	0	0	0	0
PA14_RS13160 → / → PA14_RS13165:2,804,990:intergenic (+217/‑35)	PA14_RS13160	PA14_32270		porin	0	0	0	0.08	0	-0.06	0	0	0	0	0	0	0	0	0	0	0	0.06	0.08	0	0	0	0	0	0	0	0
PA14_RS13175 →:2,807,691:P278P (CCG→CCC)	PA14_RS13175	PA14_32300		kinase	0	0	0	0	0	0	-0.19	0	0	0	0	0	0	0	0	0	0	0	0	0	0	0.19	0	0	0	0	0
PA14_RS13180 → / ← PA14_RS13185:2,808,632:intergenic (+4/+40)	PA14_RS13180	PA14_32310		hypothetical protein	0	0	0	0	0	0	0	0.11	0	0	0	0	0	0	0	0	0	0	0	0	0	0	0	0	0	0.11	0
PA14_RS13245 ←:2,822,635:N161T (AAC→ACC)	PA14_RS13245	PA14_32460		transcriptional regulator	0	0	0	0.07	0	0	0	0	-0.05	0	0	0	0	0	0	0	0	0	0.07	0	0	0	0	0.05	0	0	0
PA14_RS13275 → / ← PA14_RS13280:2,827,514:intergenic (+72/+118)	PA14_RS13275	PA14_32540		hypothetical protein	0	0	0	0	0	0	0	0	0.06	0	0	0	0	0	0	0	0	0	0	0	0	0	0	0	0	0	0.06
PA14_RS13395 ←:2,871,362:Q630L (CAG→CTG)	PA14_RS13395	PA14_32830		hypothetical protein	0	0	0	0	0	0	0	-0.08	0	0	0	0	0	0	0	0	0	0	0	0	0	0	0.08	0	0	0	0
PA14_RS13495 →:2,898,644:E4D (GAA→GAC)	PA14_RS13495	PA14_33110		hypothetical protein	0	0	0	0	0	0	-0.1	0	0	0	0	0	0	0	0	0	0	0	0	0	0	0.1	0	0	0	0	0
PA14_RS13495 →:2,898,658:L9R (CTG→CGG)	PA14_RS13495	PA14_33110		hypothetical protein	0	0	0	0	0.13	0	0	0	0	0	0	0	0	0	0	0	0	0	0	0.13	0	0	0	0	0	0	0
PA14_RS13495 →:2,898,660:R10G (CGC→GGC)	PA14_RS13495	PA14_33110		hypothetical protein	0	0	0	0	0	0	-0.1	0	-0.13	0	0	0	0	0	0	0	0	0	0	0	0	0.1	0	0.13	0	0	0
PA14_RS13510 →:2,902,438:R26P (CGC→CCC)	PA14_RS13510	PA14_33150		hypothetical protein	0	0	0	0.08	0	0	0	0	0	0	0	0	0	0	0	0	0	0	0.08	0	0	0	0	0	0	0	0
PA14_RS13660 → / ← PA14_RS13665:2,950,075:intergenic (+63/+37)	PA14_RS13660	PA14_33520		thioesterase	0	0	0	0	-0.09	0	0	0	0	0	0	0	0	0	0	0	0.09	0	0	0	0	0	0	0	0	0	0
PA14_RS13670 ←:2,951,685:G83R (GGG→CGG)	PA14_RS13670	PA14_33540		ABC transporter permease	0	0	0	0	-0.06	0	0	0	0	0	0	0	0	0	0	0	0.06	0	0	0	0	0	0	0	0	0	0
PA14_RS13685 ←:2,954,192:G12A (GGC→GCC)	PA14_RS13685	PA14_33570		hypothetical protein	0	0	0	0	0	0	0.02	0	0	0	0	0	0	0	0	0	0	0	0	0	0	0.08	0	0	0.1	0	0
PA14_RS13685 ←:2,954,200:A9A (GCC→GCG) ‡	PA14_RS13685	PA14_33570		hypothetical protein	0	0	0	0	0	-0.2	0	0	0	0	0	0	0	0	0	0	0	0.2	0	0	0	0	0	0	0	0	0
PA14_RS13685 ←:2,954,201:A9G (GCC→GGC) ‡	PA14_RS13685	PA14_33570		hypothetical protein	0	0	0	0	0	-0.07	0	0	0	0	0	0	0	0	0	0	0	0.07	0	0	0	0	0	0	0	0	0
PA14_RS13685 ←:2,954,226:M1M (ATG→TTG) †	PA14_RS13685	PA14_33570		hypothetical protein	0	0	0	0	0.11	0	0.11	0	0	0	0	0	0	0	0	0	0	0	0	0.11	0	0	0	0	0.11	0	0
PA14_RS13690 ←::P109P (CCA→CCT)	PA14_RS13690	PA14_33580		hypothetical protein	0	0	0	0	0	0	0	0	0	0	0	0	0	0	0	0	0	0	0	0	0	0	0	0	0	0	0
PA14_RS13690 ←:2,954,296:E86V (GAG→GTG)	PA14_RS13690	PA14_33580		hypothetical protein	0	0	0	0	0	0	0	0.05	0	0	0	0	0	0	0	0	0	0	0	0	0	0	0	0	0	0.05	0
PA14_RS13705 →:2,961,836:L1741R (CTG→CGG)	PA14_RS13705	PA14_33610		peptide synthase	0	0	0	-0.12	0	0	0	0	0	0	0	0	0	0	0	0.12	0	0	0	0	0	0	0	0	0	0	0
PA14_RS13705 →:2,964,784:M2724L (ATG→TTG)	PA14_RS13705	PA14_33610		peptide synthase	0	0	0	0	0	0	0	0.08	0	0	0	0	0	0	0	0	0	0	0	0	0	0	0	0	0	0.08	0
PA14_RS13705 →:2,966,624:V3337D (GTC→GAC)	PA14_RS13705	PA14_33610		peptide synthase	0	0	0	0	0	0	0	0	-0.05	0	0	0	0	0	0	0	0	0	0	0	0	0	0	0.05	0	0	0
PA14_RS13800 → / → PA14_RS13805:3,008,756:intergenic (+14/‑83)	PA14_RS13800	PA14_33840		transcriptional regulator	0	0	0	0	0	0	0	-0.06	0	0	0	0	0	0	0	0	0	0	0	0	0	0	0.06	0	0	0	0
PA14_RS13800 →:3,008,677:L286V (CTG→GTG)	PA14_RS13800	PA14_33840		transcriptional regulator	0	0	0	0.08	0	0	-0.06	0	0	0	0	0	0	0	0	0	0	0	0.08	0	0	0.06	0	0	0	0	0
PA14_RS13930 → / → msuE:3,039,181:intergenic (+15/‑145)	PA14_RS13930	PA14_34170		hypothetical protein	0	0	0	0	0	0.1	0	0	0	0	0	0	0	0	0	0	0	0	0	0	0.1	0	0	0	0	0	0
PA14_RS14080 ← / ← PA14_RS14085:3,073,648:intergenic (‑203/+15)	PA14_RS14080	PA14_34580		hypothetical protein	0	0	0	0	0	0	0	-0.12	0	0	0	0	0	0	0	0	0	0	0	0	0	0	0.12	0	0	0	0
PA14_RS14080 ←:3,073,168:I93N (ATC→AAC)	PA14_RS14080	PA14_34580		hypothetical protein	0	0	0	0	0	0	0	0	-0.06	0	0	0	0	0	0	0	0	0	0	0	0	0	0	0.06	0	0	0
PA14_RS14080 ←:3,073,256:R64G (CGC→GGC)	PA14_RS14080	PA14_34580		hypothetical protein	0	0	0	0	0	0	0	0.09	0	0	0	0	0	0	0	0	0	0	0	0	0	0	0	0	0	0.09	0
PA14_RS14125 → / → PA14_RS14130:3,084,562:intergenic (+151/‑148)	PA14_RS14125	PA14_34710		major facilitator transporter	0	0	0	0	-0.05	0	0	0	0	0	0	0	0	0	0	0	0.05	0	0	0	0	0	0	0	0	0	0
PA14_RS14125 → / → PA14_RS14130:3,084,616:intergenic (+205/‑94)	PA14_RS14125	PA14_34710		major facilitator transporter	0	0	0	0	0	0	0	-0.09	-0.1	0	0	0	0	0	0	0	0	0	0	0	0	0	0.09	0.1	0	0	0
PA14_RS14175 →:3,095,120:G153D (GGC→GAC)	PA14_RS14175	PA14_34820		regulatory protein	0	0	0	0	0	-0.07	0	0	0	0	0	0	0	0	0	0	0	0.07	0	0	0	0	0	0	0	0	0
PA14_RS14180 →:3,096,138:W131R (TGG→AGG)	PA14_RS14180	PA14_34830		regulatory protein	0	0	0	0	-0.05	0	0	0	0	0	0	0	0	0	0	0	0.05	0	0	0	0	0	0	0	0	0	0
PA14_RS14185 → / → PA14_RS14190:3,103,195:intergenic (+31/‑37)	PA14_RS14185	PA14_34840		non-ribosomal peptide synthetase	0	0	0	0	0	0.17	0	0	-0.16	0	0	0	0	0	0	0	0	0	0	0	0.17	0	0	0.16	0	0	0
PA14_RS14185 →:3,100,522:A1246P (GCG→CCG)	PA14_RS14185	PA14_34840		non-ribosomal peptide synthetase	0	0	0	0	0	-0.08	0	0	0	0	0	0	0	0	0	0	0	0.08	0	0	0	0	0	0	0	0	0
PA14_RS14185 →:3,102,994:S2070T (TCC→ACC)	PA14_RS14185	PA14_34840		non-ribosomal peptide synthetase	0	0	0	0	0	0	-0.06	0	0	0	0	0	0	0	0	0	0	0	0	0	0	0.06	0	0	0	0	0
PA14_RS14190 →:3,103,257:R9P (CGC→CCC)	PA14_RS14190	PA14_34850		tRNA synthase	0	0	0	0	0	0	0.06	0	0	0	0	0	0	0	0	0	0	0	0	0	0	0	0	0	0.06	0	0
PA14_RS14255 ←:3,117,865:A414A (GCG→GCC) ‡	PA14_RS14255	PA14_35020		hypothetical protein	0	0	0	0	0	0	0	0	-0.15	0	0	0	0	0	0	0	0	0	0	0	0	0	0	0.15	0	0	0
PA14_RS14255 ←:3,117,867:A414P (GCG→CCG) ‡	PA14_RS14255	PA14_35020		hypothetical protein	0	0	0	0	0	0	0	0	-0.19	0	0	0	0	0	0	0	0	0	0	0	0	0	0	0.19	0	0	0
PA14_RS14255 ←:3,117,869:R413P (CGC→CCC)	PA14_RS14255	PA14_35020		hypothetical protein	0	0	0	0	0	0	0	-0.13	0	0	0	0	0	0	0	0	0	0	0	0	0	0	0.13	0	0	0	0
PA14_RS14255 ←:3,117,872:A412G (GCG→GGG)	PA14_RS14255	PA14_35020		hypothetical protein	0	0	0	0	0	0.11	0	0	0	0	0	0	0	0	0	0	0	0	0	0	0.11	0	0	0	0	0	0
PA14_RS14270 ←:3,121,773:Q40L (CAG→CTG)	PA14_RS14270	PA14_35050		hypothetical protein	0	0	0	0.12	0	0	0	0	0	0	0	0	0	0	0	0	0	0	0.12	0	0	0	0	0	0	0	0
PA14_RS14350 → / ← PA14_RS14355:3,135,879:intergenic (+47/+53)	PA14_RS14350	PA14_35250		LysR family transcriptional regulator	0	0	0	0	0	0	0	-0.09	0	0	0	0	0	0	0	0	0	0	0	0	0	0	0.09	0	0	0	0
PA14_RS14365 ← / ← PA14_RS14370:3,139,899:intergenic (‑142/+26)	PA14_RS14365	PA14_35300		hypothetical protein	0	0	0	0.08	0	0	0	0	0	0	0	0	0	0	0	0	0	0	0.08	0	0	0	0	0	0	0	0
PA14_RS14380 ←:3,142,917:S112A (TCG→GCG)	PA14_RS14380	PA14_35340		2-ketogluconate kinase	0	0	0	-0.08	0	0	0	0	0	0	0	0	0	0	0	0.08	0	0	0	0	0	0	0	0	0	0	0
PA14_RS14520 ← / ← PA14_RS14525:3,176,855:intergenic (‑279/+129)	PA14_RS14520	PA14_35720		hypothetical protein	0	0	0	0	0	0	0.05	-0.05	0	0	0	0	0	0	0	0	0	0	0	0	0	0	0.05	0.06	0.05	0	0.06
PA14_RS14535 → / ← PA14_RS14540:3,180,917:intergenic (+37/+143)	PA14_RS14535	PA14_35750		tpnA repressor protein	0	0	0	0	0	0.06	0	0	0	0	0	0	0	0	0	0	0	0	0	0	0.06	0	0	0	0	0	0
PA14_RS14535 → / ← PA14_RS14540:3,180,942:intergenic (+62/+118)	PA14_RS14535	PA14_35750		tpnA repressor protein	0	0	0	0.08	0	0	0	0	0	0	0	0	0	0	0	0	0	0	0.08	0	0	0	0	0	0	0	0
PA14_RS14660 ←:3,210,282:A406P (GCC→CCC)	PA14_RS14660	PA14_36050		aldehyde dehydrogenase	0	0	0	0	0	0	-0.07	0	0	0	0	0	0	0	0	0	0	0	0	0	0	0.07	0	0	0	0	0
PA14_RS14660 ←:3,210,307:S397R (AGC→AGG)	PA14_RS14660	PA14_36050		aldehyde dehydrogenase	0	0	0	-0.09	0	0	0	0	0	0	0	0	0	0	0	0.09	0	0	0	0	0	0	0	0	0	0	0
PA14_RS14680 ←:3,215,808:D269V (GAT→GTT)	PA14_RS14680	PA14_36090		porin	0	0	0	0	0	-0.06	0	0	0	0	0	0	0	0	0	0	0	0.06	0	0	0	0	0	0	0	0	0
PA14_RS14745 ←:3,229,456:M250L (ATG→CTG)	PA14_RS14745	PA14_36260		signal transduction protein	0	0	0	0	0	0	0	-0.07	0	0	0	0	0	0	0	0	0	0	0	0	0	0	0.07	0	0	0	0
PA14_RS14760 ←:3,232,062:A164P (GCC→CCC)	PA14_RS14760	PA14_36290		hypothetical protein	0	0	0	0	0	0	0	0	-0.08	0	0	0	0	0	0	0	0	0	0	0	0	0	0	0.08	0	0	0
PA14_RS14760 ←:3,232,067:V162G (GTC→GGC)	PA14_RS14760	PA14_36290		hypothetical protein	0	0	0	0	0	0	0	-0.06	0	0	0	0	0	0	0	0	0	0	0	0	0	0	0.06	0	0	0	0
PA14_RS14800 ←:3,240,237:D42H (GAC→CAC)	PA14_RS14800	PA14_36370		carboxylate-amine ligase	0	0	0	-0.08	0	0	0	0	0	0	0	0	0	0	0	0.08	0	0	0	0	0	0	0	0	0	0	0
PA14_RS14800 ←:3,240,256:G35G (GGA→GGT)	PA14_RS14800	PA14_36370		carboxylate-amine ligase	0	0	0	0	0	0	0	0.07	0	0	0	0	0	0	0	0	0	0	0	0	0	0	0	0	0	0.07	0
PA14_RS14815 ← / → PA14_RS14820:3,243,156:intergenic (‑95/‑67)	PA14_RS14815	PA14_36400		hypothetical protein	0	0	0	-0.07	0	0	0	0	0	0	0	0	0	0	0	0.07	0	0	0	0	0	0	0	0	0	0	0
PA14_RS14815 ← / → PA14_RS14820:3,243,178:intergenic (‑117/‑45)	PA14_RS14815	PA14_36400		hypothetical protein	0	0	0	0	0	0	0	0	-0.08	0	0	0	0	0	0	0	0	0	0	0	0	0	0	0.08	0	0	0
PA14_RS14815 ←:3,242,949:D38V (GAT→GTT)	PA14_RS14815	PA14_36400		hypothetical protein	0	0	0	0	0	0.09	0	-0.07	0	0	0	0	0	0	0	0	0	0	0	0	0.09	0	0.07	0	0	0	0
PA14_RS14815 ←:3,242,958:E35V (GAG→GTG)	PA14_RS14815	PA14_36400		hypothetical protein	0	0	0	0	0	0	0	0	0	0	0	0	0	0	0	0	0	0	0	0	0	0	0	0.1	0	0	0.1
PA14_RS14815 ←:3,243,003:R20P (CGC→CCC)	PA14_RS14815	PA14_36400		hypothetical protein	0	0	0	0	0	0	0	0.1	0	0	0	0	0	0	0	0	0	0	0	0	0	0	0	0	0	0.1	0
PA14_RS14840 →:3,247,268:A6G (GCG→GGG)	PA14_RS14840	PA14_36470		hypothetical protein	0	0	0	-0.07	0	0	0	0	0	0	0	0	0	0	0	0.07	0	0	0	0	0	0	0	0	0	0	0
PA14_RS14845 ← / ← PA14_RS14850:3,247,842:intergenic (‑30/+26)	PA14_RS14845	PA14_36480		hypothetical protein	0	0	0	0	0	0	0.25	0	-0.13	0	0	0	0	0	0	0	0	0	0	0	0	0	0	0.13	0.25	0	0
PA14_RS14875 ←:3,252,324:E41V (GAG→GTG)	PA14_RS14875	PA14_36550		hypothetical protein	0	0	0	0	0	-0.06	0	0	0	0	0	0	0	0	0	0	0	0.06	0	0	0	0	0	0	0	0	0
PA14_RS14875 ←:3,252,385:E21Q (GAA→CAA)	PA14_RS14875	PA14_36550		hypothetical protein	0	0	0	0	0.13	-0.11	0	-0.19	0	0	0	0	0	0	0	0	0	0.11	0	0.13	0	0	0.19	0	0	0	0
PA14_RS14905 →:3,261,735:E40D (GAA→GAC)	PA14_RS14905	PA14_36620		hypothetical protein	0	0	0	0	0	0.1	0	0	0	0	0	0	0	0	0	0	0	0	0	0	0.1	0	0	0	0	0	0
PA14_RS14930 →:3,267,388:L179Q (CTG→CAG)	PA14_RS14930	PA14_36680		hypothetical protein	0	0	0	0	0	0	0	0	0.09	0	0	0	0	0	0	0	0	0	0	0	0	0	0	0	0	0	0.09
PA14_RS15010 ←:3,285,828:N285K (AAC→AAG)	PA14_RS15010	PA14_36870		short-chain dehydrogenase	0	0	0	0	0	0	-0.06	0	0	0	0	0	0	0	0	0	0	0	0	0	0	0.06	0	0	0	0	0
PA14_RS15110 ←:3,306,418:L257Q (CTG→CAG)	PA14_RS15110	PA14_37100		dehydrogenase	0	0	0	0.09	0.11	-0.08	0	0	0	0	0	0	0	0	0	0	0	0.08	0.09	0.11	0	0	0	0	0	0	0
PA14_RS15110 ←:3,306,434:R252G (CGC→GGC)	PA14_RS15110	PA14_37100		dehydrogenase	0	0	0	0	0	0	0	0	-0.09	0	0	0	0	0	0	0	0	0	0	0	0	0	0	0.09	0	0	0
PA14_RS15120 ←:3,308,652:P249R (CCG→CGG)	PA14_RS15120	PA14_37130		hypothetical protein	0	0	0	0	0	0	0	0	0.08	0	0	0	0	0	0	0	0	0	0	0	0	0	0	0	0	0	0.08
PA14_RS15205 ←:3,325,848:A60V (GCG→GTG)	PA14_RS15205	PA14_37360		short chain dehydrogenase	0	0	0	0	0	0	0	-0.05	0	0	0	0	0	0	0	0	0	0	0	0	0	0	0.05	0	0	0	0
PA14_RS15205 ←:3,325,899:coding (128/759 nt)	PA14_RS15205	PA14_37360		short chain dehydrogenase	0	0	0	-0.32	0	0	0	0	0	0	0	0	0	0	0	0.32	0	0	0	0	0	0	0	0	0	0	0
PA14_RS15230 ←:3,331,216:L115Q (CTG→CAG)	PA14_RS15230	PA14_37420		transmembrane sensor protein	0	0	0	0.06	0	0	0	0	0	0	0	0	0	0	0	0	0	0	0.06	0	0	0	0	0	0	0	0
PA14_RS15245 ←:3,334,362:R91R (CGC→CGG)	PA14_RS15245	PA14_37460		permease	0	0	0	0.13	0	0	0	0	0	0	0	0	0	0	0	0	0	0	0.13	0	0	0	0	0	0	0	0
PA14_RS15305 → / → PA14_RS15310:3,349,031:intergenic (+168/‑118)	PA14_RS15305	PA14_37630		amino acid permease	0	0	0	0.32	0	-0.34	0	0	0.26	0	0	0	0	0	0	0	0	0.34	0.32	0	0	0	0	0	0	0	0.26
PA14_RS15305 → / → PA14_RS15310:3,349,034:intergenic (+171/‑115)	PA14_RS15305	PA14_37630		amino acid permease	0	0	0	0	0	0	0	0	-0.26	0	0	0	0	0	0	0	0	0	0	0	0	0	0	0.26	0	0	0
PA14_RS15305 → / → PA14_RS15310:3,349,036:intergenic (+173/‑113)	PA14_RS15305	PA14_37630		amino acid permease	0	0	0	0	0	0	0.12	0	0	0	0	0	0	0	0	0	0	0	0	0	0	0	0	0	0.12	0	0
PA14_RS15305 → / → PA14_RS15310:3,349,037:intergenic (+174/‑112)	PA14_RS15305	PA14_37630		amino acid permease	0	0	0	0	0	0	-0.16	0	0.25	0	0	0	0	0	0	0	0	0	0	0	0	0.16	0	0	0	0	0.25
PA14_RS15315 →:3,352,501:Q480L (CAG→CTG)	PA14_RS15315	PA14_37650		hypothetical protein	0	0	0	0	0	0	-0.09	0	0	0	0	0	0	0	0	0	0	0	0	0	0	0.09	0	0	0	0	0
PA14_RS15380 ←:3,372,338:L334R (CTG→CGG)	PA14_RS15380	PA14_37820		hypothetical protein	0	0	0	0	0	0	0	0	-0.09	0	0	0	0	0	0	0	0	0	0	0	0	0	0	0.09	0	0	0
PA14_RS15380 ←:3,372,339:L334V (CTG→GTG)	PA14_RS15380	PA14_37820		hypothetical protein	0	0	0	0	0	0	0	-0.13	0	0	0	0	0	0	0	0	0	0	0	0	0	0	0.13	0	0	0	0
PA14_RS15690 ← / ← PA14_RS15695:3,445,914:intergenic (‑186/+27)	PA14_RS15690	PA14_38610		hypothetical protein	0	0	0	0	0	0	0	0	0.17	0	0	0	0	0	0	0	0	0	0	0	0	0	0	0	0	0	0.17
PA14_RS15715 →:3,450,210:A144T (GCG→ACG)	PA14_RS15715	PA14_38690		acetoacetyl-CoA synthetase	0	0	0	0	0	0.06	0	0	0	0	0	0	0	0	0	0	0	0	0	0	0.06	0	0	0	0	0	0
PA14_RS15780 ←:3,462,968:T412T (ACC→ACT)	PA14_RS15780	PA14_38840		NAD+ dependent acetaldehyde dehydrogenase	0	0	0	0	0.05	0	0	0	0	0	0	0	0	0	0	0	0	0	0	0.05	0	0	0	0	0	0	0
PA14_RS15875 ←:3,485,302:D20V (GAT→GTT)	PA14_RS15875	PA14_39110		hypothetical protein	0	0	0	0	0	0	0	0.05	0	0	0	0	0	0	0	0	0	0	0	0	0	0	0	0	0	0.05	0
PA14_RS15935 →:3,494,138:S102R (AGC→CGC)	PA14_RS15935	PA14_39240		hypothetical protein	0	0	0	0	0	0.06	0	0	0	0	0	0	0	0	0	0	0	0	0	0	0.06	0	0	0	0	0	0
PA14_RS15935 →:3,494,812:A326A (GCC→GCG)	PA14_RS15935	PA14_39240		hypothetical protein	0	0	0	0	0	0	-0.07	0	0	0	0	0	0	0	0	0	0	0	0	0	0	0.07	0	0	0	0	0
PA14_RS15950 → / ← rbsK:3,497,784:intergenic (+93/+41)	PA14_RS15950	PA14_39270		hypothetical protein	0	0	0	0	0	0	0	-0.16	0	0	0	0	0	0	0	0	0	0	0	0	0	0	0.16	0	0	0	0
PA14_RS15950 → / ← rbsK:3,497,787:intergenic (+96/+38)	PA14_RS15950	PA14_39270		hypothetical protein	0	0	0	0	0	0	0	0.09	0	0	0	0	0	0	0	0	0	0	0	0	0	0	0	0	0	0.09	0
PA14_RS15950 → / ← rbsK:3,497,789:intergenic (+98/+36)	PA14_RS15950	PA14_39270		hypothetical protein	0	0	0	0	0	0	0	0	0.12	0	0	0	0	0	0	0	0	0	0	0	0	0	0	0	0	0	0.12
PA14_RS16090 →:3,538,332:G48A (GGC→GCC)	PA14_RS16090	PA14_39710		radical SAM protein	0	0	0	0	0	0	-0.09	0	0	0	0	0	0	0	0	0	0	0	0	0	0	0.09	0	0	0	0	0
PA14_RS16130 →:3,547,494:A197P (GCG→CCG)	PA14_RS16130	PA14_39810		transmembrane sensor	0	0	0	0	-0.16	0	0	0	0	0	0	0	0	0	0	0	0.16	0	0	0	0	0	0	0	0	0	0
PA14_RS16150 →:3,552,790:L312V (CTG→GTG)	PA14_RS16150	PA14_39850		MFS transporter	0	0	0	0	0	-0.09	0	0	0	0	0	0	0	0	0	0	0	0.09	0	0	0	0	0	0	0	0	0
PA14_RS16155 →:3,553,787:G241G (GGC→GGG)	PA14_RS16155	PA14_39860		hypothetical protein	0	0	0	0	0	-0.12	0	0	0	0	0	0	0	0	0	0	0	0.12	0	0	0	0	0	0	0	0	0
PA14_RS16155 →:3,553,796:S244S (TCG→TCC)	PA14_RS16155	PA14_39860		hypothetical protein	0	0	0	0	0.11	0	0	0	0	0	0	0	0	0	0	0	0	0	0	0.11	0	0	0	0	0	0	0
PA14_RS16155 →:3,553,820:T252T (ACG→ACC)	PA14_RS16155	PA14_39860		hypothetical protein	0	0	0	-0.16	0	0	0	0	0	0	0	0	0	0	0	0.16	0	0	0	0	0	0	0	0	0	0	0
PA14_RS16325 ←:3,590,868:T1949T (ACT→ACA)	PA14_RS16325	PA14_40260		hypothetical protein	0	0	0	0	0	0	0	0	-0.05	0	0	0	0	0	0	0	0	0	0	0	0	0	0	0.05	0	0	0
PA14_RS16335 → / ← lasA:3,599,180:intergenic (+92/+35)	PA14_RS16335	PA14_40280		hypothetical protein	0	0	0	0	0	0	0	0	-0.09	0	0	0	0	0	0	0	0	0	0	0	0	0	0	0.09	0	0	0
PA14_RS16335 → / ← lasA:3,599,182:intergenic (+94/+33)	PA14_RS16335	PA14_40280		hypothetical protein	0	0	0	0	0	0	0	0.14	0	0	0	0	0	0	0	0	0	0	0	0	0	0	0	0	0	0.14	0
PA14_RS16360 ← / ← PA14_RS16365:3,604,787:intergenic (‑72/+70)	PA14_RS16360	PA14_40330		hypothetical protein	0	0	0	0	0	0	-0.11	0	0	0	0	0	0	0	0	0	0	0	0	0	0	0.11	0	0	0	0	0
PA14_RS16420 → / → ccoN:3,617,879:intergenic (+129/‑218)	PA14_RS16420	PA14_40490		hypothetical protein	0	0	0	-0.08	0	0	0	0	0	0	0	0	0	0	0	0.08	0	0	0	0	0	0	0	0	0	0	0
PA14_RS16450 ←:3,622,770:L303W (TTG→TGG)	PA14_RS16450	PA14_40570		two-component response regulator	0	0	0	0	0	0	0	0	-0.09	0	0	0	0	0	0	0	0	0	0	0	0	0	0	0.09	0	0	0
PA14_RS16530 → / ← PA14_RS16535:3,640,030:intergenic (+20/+45)	PA14_RS16530	PA14_40780		hypothetical protein	0	0	0	0	0	0	0.11	0	0	0	0	0	0	0	0	0	0	0	0	0	0	0	0	0	0.11	0	0
PA14_RS16605 ←:3,652,985:L226Q (CTG→CAG)	PA14_RS16605	PA14_40960		pilin biosynthetic protein	0	0	0	0	-0.05	0	0	0	0.01	0	0	0	0	0	0	0	0.05	0	0	0	0	0	0	0.06	0	0	0.07
PA14_RS16805 →:3,695,994:R245G (CGC→GGC)	PA14_RS16805	PA14_41440		hypothetical protein	0	0	0	0	0	0	0.1	0	0	0	0	0	0	0	0	0	0	0	0	0	0	0	0	0	0.1	0	0
PA14_RS16925 →:3,724,230:D80V (GAT→GTT)	PA14_RS16925	PA14_41730		hypothetical protein	0	0	0	-0.06	-0.05	0	0	0	0	0	0	0	0	0	0	0.06	0.05	0	0	0	0	0	0	0	0	0	0
PA14_RS16925 →:3,724,236:V82D (GTC→GAC)	PA14_RS16925	PA14_41730		hypothetical protein	0	0	0	0	0	0	0	0	-0.08	0	0	0	0	0	0	0	0	0	0	0	0	0	0	0.08	0	0	0
PA14_RS16925 →:3,724,251:Q87P (CAG→CCG)	PA14_RS16925	PA14_41730		hypothetical protein	0	0	0	-0.02	0	0	0	0	0	0	0	0	0	0	0	0.11	0	0	0.09	0	0	0	0	0	0	0	0
PA14_RS16980 →:3,739,378:N111K (AAT→AAA)	PA14_RS16980	PA14_41860		hypothetical protein	0	0	0	0	0	0	0	0.06	0	0	0	0	0	0	0	0	0	0	0	0	0	0	0	0	0	0.06	0
PA14_RS16990 ← / ← PA14_RS16995:3,741,188:intergenic (‑135/+28)	PA14_RS16990	PA14_41880		universal stress protein	0	0	0	0	0	0	0	0	0.08	0	0	0	0	0	0	0	0	0	0	0	0	0	0	0	0	0	0.08
PA14_RS17045 → / ← PA14_RS17050:3,747,619:intergenic (+4/+54)	PA14_RS17045	PA14_42000		hypothetical protein	0	0	0	0	0	0	0.12	0	0	0	0	0	0	0	0	0	0	0	0	0	0	0	0	0	0.12	0	0
PA14_RS17050 ← / → PA14_RS17055:3,748,479:intergenic (‑84/‑160)	PA14_RS17050	PA14_42010		amidotransferase	0	0	0	0	0	0	0	0.08	0	0	0	0	0	0	0	0	0	0	0	0	0	0	0	0	0	0.08	0
PA14_RS17050 ← / → PA14_RS17055:3,748,494:intergenic (‑99/‑145)	PA14_RS17050	PA14_42010		amidotransferase	0	0	0	0	0	-0.05	0	0	0	0	0	0	0	0	0	0	0	0.05	0	0	0	0	0	0	0	0	0
PA14_RS17070 → / ← PA14_RS17075:3,752,240:intergenic (+164/+221)	PA14_RS17070	PA14_42060		transcriptional regulator	0	0	0	0	0	0	0	0	-0.11	0	0	0	0	0	0	0	0	0	0	0	0	0	0	0.11	0	0	0
PA14_RS17125 ← / → PA14_RS17130:3,763,859:intergenic (‑170/‑183)	PA14_RS17125	PA14_42200		hypothetical protein	0	0	0	0	0	-0.13	0	0	0	0	0	0	0	0	0	0	0	0.13	0	0	0	0	0	0	0	0	0
PA14_RS17350 ←:3,800,605:M145K (ATG→AAG)	PA14_RS17350	PA14_42730		oxidase	0	0	0	0	0	0.06	0	0	0	0	0	0	0	0	0	0	0	0	0	0	0.06	0	0	0	0	0	0
PA14_RS17350 ←:3,800,615:W142R (TGG→AGG)	PA14_RS17350	PA14_42730		oxidase	0	0	0	0	0	0	0	-0.15	0	0	0	0	0	0	0	0	0	0	0	0	0	0	0.15	0	0	0	0
PA14_RS17360 ←:3,801,882:S307C (AGT→TGT)	PA14_RS17360	PA14_42750		MFS metabolite transporter	0	0	0	0	0	0.07	0	0	0	0	0	0	0	0	0	0	0	0	0	0	0.07	0	0	0	0	0	0
PA14_RS17375 →:3,805,477:Q125P (CAA→CCA)	PA14_RS17375	PA14_42780		hypothetical protein	0	0	0	0	0	-0.17	0	0	0	0	0	0	0	0	0	0	0	0.17	0	0	0	0	0	0	0	0	0
PA14_RS17390 →:3,808,008:R83G (CGT→GGT)	PA14_RS17390	PA14_42830		hypothetical protein	0	0	0	0	0	0	0	-0.06	0	0	0	0	0	0	0	0	0	0	0	0	0	0	0.06	0	0	0	0
PA14_RS17405 ←:3,809,799:V16D (GTC→GAC)	PA14_RS17405	PA14_42860		hypothetical protein	0	0	0	0	-0.08	0	0	0	0	0	0	0	0	0	0	0	0.08	0	0	0	0	0	0	0	0	0	0
PA14_RS17640 ←:3,868,633:T88T (ACC→ACA)	PA14_RS17640	PA14_43420		acyl-CoA dehydrogenase	0	0	0	0	0	0	0	0.08	0	0	0	0	0	0	0	0	0	0	0	0	0	0	0	0	0	0.08	0
PA14_RS17675 ←:3,875,922:P208A (CCG→GCG)	PA14_RS17675	PA14_43520		hypothetical protein	0	0	0	0.12	0	0	0	0	-0.08	0	0	0	0	0	0	0	0	0	0.12	0	0	0	0	0.08	0	0	0
PA14_RS17810 ← / ← htpG:3,904,019:intergenic (‑19/+49)	PA14_RS17810	PA14_43840		hypothetical protein	0	0	0	0	0	0	0	0	-0.06	0	0	0	0	0	0	0	0	0	0	0	0	0	0	0.06	0	0	0
PA14_RS17820 ←:3,906,308:A338P (GCC→CCC)	PA14_RS17820	PA14_43870		hypothetical protein	0	0	0	0	0	-0.1	0.01	0.04	-0.08	0	0	0	0	0	0	0	0	0.1	0	0	0	0.1	0.08	0.08	0.11	0.12	0
PA14_RS17935 ←:3,929,350:Q31H (CAG→CAC)	PA14_RS17935	PA14_44150		hypothetical protein	0	0	0	0	0	-0.06	0	0	0	0	0	0	0	0	0	0	0	0.06	0	0	0	0	0	0	0	0	0
PA14_RS17940 ←:3,930,099:V167G (GTG→GGG)	PA14_RS17940	PA14_44160		ATP-NAD kinase	0	0	0	0	0	-0.09	0	0	0	0	0	0	0	0	0	0	0	0.09	0	0	0	0	0	0	0	0	0
PA14_RS17965 →:3,934,291:L58V (CTG→GTG)	PA14_RS17965	PA14_44210		glycine/D-amino acid oxidase	0	0	0	0	-0.08	0	-0.08	0	0	0	0	0	0	0	0	0	0.08	0	0	0	0	0.08	0	0	0	0	0
PA14_RS17965 →:3,934,311:C64W (TGC→TGG)	PA14_RS17965	PA14_44210		glycine/D-amino acid oxidase	0	0	0	-0.06	0	0	0	0	0	0	0	0	0	0	0	0.06	0	0	0	0	0	0	0	0	0	0	0
PA14_RS17970 →:3,936,121:V46D (GTC→GAC)	PA14_RS17970	PA14_44240		glutamine synthetase	0	0	0	0	0	0	0.07	0	0	0	0	0	0	0	0	0	0	0	0	0	0	0	0	0	0.07	0	0
PA14_RS18095 → / → PA14_RS18100:3,964,245:intergenic (+82/‑327)	PA14_RS18095	PA14_44510		hypothetical protein	0	0	0	0	0	0	0.06	0	0	0	0	0	0	0	0	0	0	0	0	0	0	0	0	0	0.06	0	0
PA14_RS18285 → / ← PA14_RS18290:4,011,022:intergenic (+49/+356)	PA14_RS18285	PA14_44980		TetR family transcriptional regulator	0	0	0	0	-0.07	0	0	0	0	0	0	0	0	0	0	0	0.07	0	0	0	0	0	0	0	0	0	0
PA14_RS18305 → / → PA14_RS18310:4,015,958:intergenic (+202/‑95)	PA14_RS18305	PA14_45020		oxidoreductase	0	0	0	0.07	0	0	0	0	0	0	0	0	0	0	0	0	0	0	0.07	0	0	0	0	0	0	0	0
PA14_RS18305 →:4,015,737:F291Y (TTC→TAC)	PA14_RS18305	PA14_45020		oxidoreductase	0	0	0	0	0	0	-0.06	0	0	0	0	0	0	0	0	0	0	0	0	0	0	0.06	0	0	0	0	0
PA14_RS18320 →:4,019,762:L215V (CTG→GTG)	PA14_RS18320	PA14_45060		transporter	0	0	0	0	0	-0.1	-0.12	0	0	0	0	0	0	0	0	0	0	0.1	0	0	0	0.12	0	0	0	0	0
PA14_RS18365 →:4,029,393:G163A (GGC→GCC)	PA14_RS18365	PA14_45180		oxidoreductase	0	0	0	0	0	0	0	-0.07	0	0	0	0	0	0	0	0	0	0	0	0	0	0	0.07	0	0	0	0
PA14_RS18365 →:4,029,441:G179A (GGC→GCC)	PA14_RS18365	PA14_45180		oxidoreductase	0	0	0	0	0	0	0	-0.1	0	0	0	0	0	0	0	0	0	0	0	0	0	0	0.1	0	0	0	0
PA14_RS18455 ←:4,045,975:A7P (GCC→CCC)	PA14_RS18455	PA14_45430		short chain dehydrogenase	0	0	0	0.06	0	0	0	0	0	0	0	0	0	0	0	0	0	0	0.06	0	0	0	0	0	0	0	0
PA14_RS18490 ←:4,050,849:E72V (GAG→GTG)	PA14_RS18490	PA14_45510		CheW domain-containing protein	0	0	0	0	0	0	-0.08	0	0	0	0	0	0	0	0	0	0	0	0	0	0	0.08	0	0	0	0	0
PA14_RS18550 ←:4,064,871:E175* (GAA→TAA)	PA14_RS18550	PA14_45700		hypothetical protein	0	0	0	-0.06	0	0	0	0	0	0	0	0	0	0	0	0.06	0	0	0	0	0	0	0	0	0	0	0
PA14_RS18665 ← / → PA14_RS18670:4,089,974:intergenic (‑160/‑100)	PA14_RS18665	PA14_45980		acetyltransferase	0	0	0	0	0	0	0	0	-0.05	0	0	0	0	0	0	0	0	0	0	0	0	0	0	0.05	0	0	0
PA14_RS18710 → / → PA14_RS18715:4,099,952:intergenic (+32/‑62)	PA14_RS18710	PA14_46100		transporter	0	0	0	0	0	0.11	0	0	0	0	0	0	0	0	0	0	0	0	0	0	0.11	0	0	0	0	0	0
PA14_RS18710 →:4,099,892:R495Q (CGG→CAG)	PA14_RS18710	PA14_46100		transporter	0	0	0	0	0.05	0	0	0	0	0	0	0	0	0	0	0	0	0	0	0.05	0	0	0	0	0	0	0
PA14_RS18720 →:4,102,475:E332V (GAG→GTG)	PA14_RS18720	PA14_46120		hypothetical protein	0	0	0	0	0	0	-0.02	0	0	0	0	0	0	0	0	0	0	0	0	0	0	0.17	0	0	0.15	0	0
PA14_RS18720 →:4,102,480:S334A (TCG→GCG)	PA14_RS18720	PA14_46120		hypothetical protein	0	0	0	0.1	0.12	0	0.1	0	0	0	0	0	0	0	0	0	0	0	0.1	0.12	0	0	0	0	0.1	0	0
PA14_RS18725 →:4,103,798:A235P (GCC→CCC)	PA14_RS18725	PA14_46140		hypothetical protein	0	0	0	0.1	0	0	0	0	0	0	0	0	0	0	0	0	0	0	0.1	0	0	0	0	0	0	0	0
PA14_RS18780 → / ← PA14_RS18785:4,117,802:intergenic (+15/+117)	PA14_RS18780	PA14_46280		hypothetical protein	0	0	0	0.08	0	0	0	0	0	0	0	0	0	0	0	0	0	0	0.08	0	0	0	0	0	0	0	0
PA14_RS18780 → / ← PA14_RS18785:4,117,814:intergenic (+27/+105)	PA14_RS18780	PA14_46280		hypothetical protein	0	0	0	0	0.28	0	0	0	0	0	0	0	0	0	0	0	0	0	0	0.28	0	0	0	0	0	0	0
PA14_RS18995 ←:4,165,306:L142H (CTC→CAC)	PA14_RS18995	PA14_46750		hypothetical protein	0	0	0	-0.16	0	0	0.11	0	0	0	0	0	0	0	0	0.16	0	0	0	0	0	0	0	0	0.11	0	0
PA14_RS18995 ←:4,165,323:W136C (TGG→TGC) ‡	PA14_RS18995	PA14_46750		hypothetical protein	0	0	0	0	0	0	0.18	0	0	0	0	0	0	0	0	0	0	0	0	0	0	0	0	0	0.18	0	0
PA14_RS18995 ←:4,165,325:W136G (TGG→GGG) ‡	PA14_RS18995	PA14_46750		hypothetical protein	0	0	0	0	0	0	0.42	0	0	0	0	0	0	0	0	0	0	0	0	0	0	0	0	0	0.42	0	0
PA14_RS18995 ←:4,165,329:A134A (GCC→GCG)	PA14_RS18995	PA14_46750		hypothetical protein	0	0	0	0	0.09	0	0	0	0	0	0	0	0	0	0	0	0	0	0	0.09	0	0	0	0	0	0	0
PA14_RS18995 ←:4,165,535:A66P (GCC→CCC)	PA14_RS18995	PA14_46750		hypothetical protein	0	0	0	0	0	-0.06	0	0	0	0	0	0	0	0	0	0	0	0.06	0	0	0	0	0	0	0	0	0
PA14_RS19010 → / → PA14_RS19015:4,167,193:intergenic (+38/‑134)	PA14_RS19010	PA14_46780		hypothetical protein	0	0	0	0	0	0.09	0	0	0	0	0	0	0	0	0	0	0	0	0	0	0.09	0	0	0	0	0	0
PA14_RS19020 ←:4,168,595:Q392P (CAG→CCG)	PA14_RS19020	PA14_46810		RNA polymerase ECF-subfamily sigma-70 factor	0	0	0	0	0	0.14	0	0	0	0	0	0	0	0	0	0	0	0	0	0	0.14	0	0	0	0	0	0
PA14_RS19080 →:4,180,882:I147S (ATC→AGC)	PA14_RS19080	PA14_46950		ABC transporter ATP-binding protein	0	0	0	0.06	0	0	0	0	0	0	0	0	0	0	0	0	0	0	0.06	0	0	0	0	0	0	0	0
PA14_RS19105 → / → PA14_RS19110:4,188,833:intergenic (+16/‑179)	PA14_RS19105	PA14_47000		oxidoreductase	0	0	0	0	0	0	0	0	-0.05	0	0	0	0	0	0	0	0	0	0	0	0	0	0	0.05	0	0	0
PA14_RS19140 ←:4,195,199:R245P (CGC→CCC)	PA14_RS19140	PA14_47090		protease	0	0	0	0	0	-0.08	0	0	-0.06	0	0	0	0	0	0	0	0	0.08	0	0	0	0	0	0.06	0	0	0
PA14_RS19140 ←:4,195,213:V240V (GTC→GTG) ‡	PA14_RS19140	PA14_47090		protease	0	0	0	0	0.11	0	0	0	0	0	0	0	0	0	0	0	0	0	0	0.11	0	0	0	0	0	0	0
PA14_RS19140 ←:4,195,214:V240G (GTC→GGC)	PA14_RS19140	PA14_47090		protease	0	0	0	0.09	-0.08	0.08	0	0	-0.09	0	0	0	0	0	0	0	0.08	0	0.09	0	0.08	0	0	0.09	0	0	0
PA14_RS19140 ←:4,195,214:V240G (GTC→GGC) ‡	PA14_RS19140	PA14_47090		protease	0	0	0	0	0.08	0	0	0	0	0	0	0	0	0	0	0	0	0	0	0.08	0	0	0	0	0	0	0
PA14_RS19200 →:4,209,337:A153A (GCC→GCG)	PA14_RS19200	PA14_47240		transcriptional regulator	0	0	0	0	0	0	0	-0.1	0	0	0	0	0	0	0	0	0	0	0	0	0	0	0.1	0	0	0	0
PA14_RS19200 →:4,209,343:P155P (CCG→CCC)	PA14_RS19200	PA14_47240		transcriptional regulator	0	0	0	0	0	-0.06	0	0	0	0	0	0	0	0	0	0	0	0.06	0	0	0	0	0	0	0	0	0
PA14_RS19215 → / ← PA14_RS19220:4,212,299:intergenic (+21/+30)	PA14_RS19215	PA14_47270		LysR family transcriptional regulator	0	0	0	0.16	0	0	0	0	0	0	0	0	0	0	0	0	0	0	0.16	0	0	0	0	0	0	0	0
PA14_RS19215 → / ← PA14_RS19220:4,212,301:intergenic (+23/+28)	PA14_RS19215	PA14_47270		LysR family transcriptional regulator	0	0	0	0	0	0	0	0.26	0	0	0	0	0	0	0	0	0	0	0	0	0	0	0	0	0	0.26	0
PA14_RS19255 → / → lepB:4,219,895:intergenic (+24/‑53)	PA14_RS19255	PA14_47360		oligopeptidase	0	0	0	0	0	0.1	0	0	0	0	0	0	0	0	0	0	0	0	0	0	0.1	0	0	0	0	0	0
PA14_RS19275 ←:4,224,330:L119R (CTG→CGG)	PA14_RS19275	PA14_47400		RNA polymerase ECF-subfamily sigma-70 factor	0	0	0	0	0	0	0	0	-0.07	0	0	0	0	0	0	0	0	0	0	0	0	0	0	0.07	0	0	0
PA14_RS19275 ←:4,224,331:L119V (CTG→GTG)	PA14_RS19275	PA14_47400		RNA polymerase ECF-subfamily sigma-70 factor	0	0	0	0	-0.08	0	0	0	0	0	0	0	0	0	0	0	0.08	0	0	0	0	0	0	0	0	0	0
PA14_RS19275 ←:4,224,342:L115R (CTG→CGG)	PA14_RS19275	PA14_47400		RNA polymerase ECF-subfamily sigma-70 factor	0	0	0	0	0	-0.07	0	0	0	0	0	0	0	0	0	0	0	0.07	0	0	0	0	0	0	0	0	0
PA14_RS19295 ← / ← PA14_RS19300:4,227,830:intergenic (‑232/+23)	PA14_RS19295	PA14_47440		2-hydroxyacid dehydrogenase	0	0	0	0.08	0	0	0	0	0	0	0	0	0	0	0	0	0	0	0.08	0	0	0	0	0	0	0	0
PA14_RS19300 ←:4,227,881:E89V (GAG→GTG)	PA14_RS19300	PA14_47450		hypothetical protein	0	0	0	0	-0.09	0	0	0	0	0	0	0	0	0	0	0	0.09	0	0	0	0	0	0	0	0	0	0
PA14_RS19325 →:4,232,696:V34D (GTC→GAC)	PA14_RS19325	PA14_47520		transcriptional regulator	0	0	0	0	0	0	0	-0.08	0	0	0	0	0	0	0	0	0	0	0	0	0	0	0.08	0	0	0	0
PA14_RS19340 ←:4,235,615:V122G (GTG→GGG)	PA14_RS19340	PA14_47550		glutathione peroxidase	0	0	0	0	0	0.1	0	0	0	0	0	0	0	0	0	0	0	0	0	0	0.1	0	0	0	0	0	0
PA14_RS19355 →:4,239,425:R477G (CGG→GGG)	PA14_RS19355	PA14_47600		acyl-CoA dehydrogenase	0	0	0	0	0	0	0	0	0.17	0	0	0	0	0	0	0	0	0	0	0	0	0	0	0	0	0	0.17
PA14_RS19450 →:4,259,246:L250F (CTC→TTC)	PA14_RS19450	PA14_47860		oxidoreductase	0	0	0	0	0.06	0	0	0	0	0	0	0	0	0	0	0	0	0	0	0.06	0	0	0	0	0	0	0
PA14_RS19460 →:4,261,285:I179L (ATC→CTC) ‡	PA14_RS19460	PA14_47880		transcriptional regulator	0	0	0	-0.24	0	0	0	-0.18	0	0	0	0	0	0	0	0.24	0	0	0	0	0	0	0.18	0	0	0	0
PA14_RS19460 →:4,261,286:I179S (ATC→AGC) ‡	PA14_RS19460	PA14_47880		transcriptional regulator	0	0	0	-0.22	0	0	0	-0.14	0	0	0	0	0	0	0	0.22	0	0	0	0	0	0	0.14	0	0	0	0
PA14_RS19470 → / → PA14_RS19475:4,264,349:intergenic (+10/‑32)	PA14_RS19470	PA14_47900		MFS transporter	0	0	0	0	0	0	0	-0.13	0	0	0	0	0	0	0	0	0	0	0	0	0	0	0.13	0	0	0	0
PA14_RS19475 →:4,264,400:S7T (AGC→ACC)	PA14_RS19475	PA14_47910		transcriptional regulator	0	0	0	0	0	0	-0.08	0	0	0	0	0	0	0	0	0	0	0	0	0	0	0.08	0	0	0	0	0
PA14_RS19505 →:4,270,187:I22M (ATC→ATG)	PA14_RS19505	PA14_47970		hypothetical protein	0	0	0	-0.11	0	0	0	0	0	0	0	0	0	0	0	0.11	0	0	0	0	0	0	0	0	0	0	0
PA14_RS19510 → / → PA14_RS19515:4,272,256:intergenic (+32/‑61)	PA14_RS19510	PA14_48000		dihydrodipicolinate synthetase	0	0	0	0	0	0	0	-0.07	-0.08	0	0	0	0	0	0	0	0	0	0	0	0	0	0.07	0.08	0	0	0
PA14_RS19515 →:4,272,318:M1K (ATG→AAG) †	PA14_RS19515	PA14_48010		semialdehyde dehydrogenase	0	0	0	-0.06	0	0	0	0	0	0	0	0	0	0	0	0.06	0	0	0	0	0	0	0	0	0	0	0
PA14_RS19515 →:4,272,359:S15R (AGC→CGC)	PA14_RS19515	PA14_48010		semialdehyde dehydrogenase	0	0	0	0	0	0	0	-0.11	0	0	0	0	0	0	0	0	0	0	0	0	0	0	0.11	0	0	0	0
PA14_RS19585 →:4,293,024:R75S (CGC→AGC)	PA14_RS19585	PA14_48210		hydrolase	0	0	0	0	-0.1	0	0	0	0	0	0	0	0	0	0	0	0.1	0	0	0	0	0	0	0	0	0	0
PA14_RS19595 →:4,296,258:F249I (TTC→ATC)	PA14_RS19595	PA14_48280		multidrug resistance efflux pump	0	0	0	0	0	0	0	0	0.13	0	0	0	0	0	0	0	0	0	0	0	0	0	0	0	0	0	0.13
PA14_RS19605 ←:4,298,679:P91P (CCG→CCC)	PA14_RS19605	PA14_48310		transcriptional regulator	0	0	0	0.11	0	0	0	0	0	0	0	0	0	0	0	0	0	0	0.11	0	0	0	0	0	0	0	0
PA14_RS19605 ←:4,298,724:R76R (CGC→CGG)	PA14_RS19605	PA14_48310		transcriptional regulator	0	0	0	0.1	0	0	0	0	0	0	0	0	0	0	0	0	0	0	0.1	0	0	0	0	0	0	0	0
PA14_RS19635 →:4,303,321:P37A (CCG→GCG)	PA14_RS19635	PA14_48390		AraC family transcriptional regulator	0	0	0	0	-0.16	0	0	0	0	0	0	0	0	0	0	0	0.16	0	0	0	0	0	0	0	0	0	0
PA14_RS19635 →:4,303,322:P37R (CCG→CGG)	PA14_RS19635	PA14_48390		AraC family transcriptional regulator	0	0	0	0	0	0.11	-0.08	0	0	0	0	0	0	0	0	0	0	0	0	0	0.11	0.08	0	0	0	0	0
PA14_RS19690 → / → PA14_RS19700:4,313,625:intergenic (+81/‑639)	PA14_RS19690	PA14_48520		membrane-bound lytic murein transglycosylase A	0	0	0	0	0	0	0	0.1	-0.17	0	0	0	0	0	0	0	0	0	0	0	0	0	0	0.17	0	0.1	0
PA14_RS19765 ←:4,328,840:F481Y (TTC→TAC)	PA14_RS19765	PA14_48680		hypothetical protein	0	0	0	0	0	0	-0.08	0	0	0	0	0	0	0	0	0	0	0	0	0	0	0.08	0	0	0	0	0
PA14_RS19840 ←:4,343,545:N222K (AAT→AAA)	PA14_RS19840	PA14_48860		hypothetical protein	0	0	0	0	0	0	0	0	0.06	0	0	0	0	0	0	0	0	0	0	0	0	0	0	0	0	0	0.06
PA14_RS19840 ←:4,343,659:K184N (AAA→AAC)	PA14_RS19840	PA14_48860		hypothetical protein	0	0	0	0	0	0	0	0	0.07	0	0	0	0	0	0	0	0	0	0	0	0	0	0	0	0	0	0.07
PA14_RS19860 ←:4,347,796:P406P (CCT→CCA)	PA14_RS19860	PA14_48910		hypothetical protein	0	0	0	0	0	0	-0.07	0	0	0	0	0	0	0	0	0	0	0	0	0	0	0.07	0	0	0	0	0
PA14_RS19940 ←:4,361,045:K118T (AAG→ACG)	PA14_RS19940	PA14_49090		hypothetical protein	0	0	0	0	0	0	0	0	0.07	0	0	0	0	0	0	0	0	0	0	0	0	0	0	0	0	0	0.07
PA14_RS20020 →:4,379,176:Q227L (CAG→CTG)	PA14_RS20020	PA14_49290		hypothetical protein	0	0	0	0	-0.08	0	0	0	0	0	0	0	0	0	0	0	0.08	0	0	0	0	0	0	0	0	0	0
PA14_RS20025 ← / ← PA14_RS20030:4,381,355:intergenic (‑23/+55)	PA14_RS20025	PA14_49300		lipoxygenase	0	0	0	0	0	0.11	0	0	0	0	0	0	0	0	0	0	0	0	0	0	0.11	0	0	0	0	0	0
PA14_RS20025 ←:4,379,810:D508V (GAC→GTC)	PA14_RS20025	PA14_49300		lipoxygenase	0	0	0	-0.08	0	0	0	0	0	0	0	0	0	0	0	0.08	0	0	0	0	0	0	0	0	0	0	0
PA14_RS20040 →:4,383,747:N224T (AAC→ACC)	PA14_RS20040	PA14_49330		hypothetical protein	0	0	0	0	0	0	-0.06	0	0	0	0	0	0	0	0	0	0	0	0	0	0	0.06	0	0	0	0	0
PA14_RS20165 ←:4,419,468:L52Q (CTG→CAG)	PA14_RS20165	PA14_49660		hypothetical protein	0	0	0	0	-0.11	0	0	0	-0.11	0	0	0	0	0	0	0	0.11	0	0	0	0	0	0	0.11	0	0	0
PA14_RS20180 ← / → hchA:4,422,549:intergenic (‑91/‑81)	PA14_RS20180	PA14_49700		transcriptional regulator	0	0	0	0.07	0	-0.09	0	0	-0.06	0	0	0	0	0	0	0	0	0.09	0.07	0	0	0	0	0.06	0	0	0
PA14_RS20300 →:4,444,747:I39F (ATC→TTC)	PA14_RS20300	PA14_49990		hypothetical protein	0	0	0	0	0	0	0	0.05	0	0	0	0	0	0	0	0	0	0	0	0	0	0	0	0	0	0.05	0
PA14_RS20310 ←:4,445,681:D206E (GAC→GAA)	PA14_RS20310	PA14_50010		dehydrogenase	0	0	0	0	0	0	0	0	0.07	0	0	0	0	0	0	0	0	0	0	0	0	0	0	0	0	0	0.07
PA14_RS20530 ←:4,496,110:A61G (GCG→GGG)	PA14_RS20530	PA14_50590		HSP90 family protein	0	0	0	0	-0.09	0	0	0.07	0	0	0	0	0	0	0	0	0.09	0	0	0	0	0	0	0	0	0.07	0
PA14_RS20570 ←:4,501,367:A212P (GCG→CCG)	PA14_RS20570	PA14_50670		hypothetical protein	0	0	0	-0.07	0	0	0	0	0	0	0	0	0	0	0	0.07	0	0	0	0	0	0	0	0	0	0	0
PA14_RS20570 ←:4,501,387:D205A (GAC→GCC)	PA14_RS20570	PA14_50670		hypothetical protein	0	0	0	0	0	0	-0.13	0	0	0	0	0	0	0	0	0	0	0	0	0	0	0.13	0	0	0	0	0
PA14_RS20570 ←:4,501,391:A204P (GCC→CCC)	PA14_RS20570	PA14_50670		hypothetical protein	0	0	0	0.2	0	0	0	0	0	0	0	0	0	0	0	0	0	0	0.2	0	0	0	0	0	0	0	0
PA14_RS20635 ←:4,514,084:H147N (CAT→AAT)	PA14_RS20635	PA14_50810		hypothetical protein	0	0	0	0	0	0.06	0	0	0	0	0	0	0	0	0	0	0	0	0	0	0.06	0	0	0	0	0	0
PA14_RS20635 ←:4,514,090:D145Y (GAT→TAT)	PA14_RS20635	PA14_50810		hypothetical protein	0	0	0	0	0	0.17	0	0	0	0	0	0	0	0	0	0	0	0	0	0	0.17	0	0	0	0	0	0
PA14_RS20635 ←:4,514,107:V139D (GTC→GAC)	PA14_RS20635	PA14_50810		hypothetical protein	0	0	0	0	0	0	0.11	0	0	0	0	0	0	0	0	0	0	0	0	0	0	0	0	0	0.11	0	0
PA14_RS21095 → / → PA14_RS21100:4,604,025:intergenic (+39/‑175)	PA14_RS21095	PA14_51830		DNA-binding stress protein	0	0	0	0	0	0	0	0	-0.08	0	0	0	0	0	0	0	0	0	0	0	0	0	0	0.08	0	0	0
PA14_RS21220 → / ← PA14_RS21225:4,622,038:intergenic (+22/+19)	PA14_RS21220	PA14_52120		hypothetical protein	0	0	0	0	0	0	0.19	0	0	0	0	0	0	0	0	0	0	0	0	0	0	0	0	0	0.19	0	0
PA14_RS21220 → / ← PA14_RS21225:4,622,045:intergenic (+29/+12)	PA14_RS21220	PA14_52120		hypothetical protein	0	0	0	0	0	0	0	-0.15	0	0	0	0	0	0	0	0	0	0	0	0	0	0	0.15	0	0	0	0
PA14_RS21325 →:4,648,037:I149F (ATT→TTT)	PA14_RS21325	PA14_52370		hypothetical protein	0	0	0	0	0	0	-0.06	0	0	0	0	0	0	0	0	0	0	0	0	0	0	0.06	0	0	0	0	0
PA14_RS21325 →:4,648,075:P161P (CCG→CCC)	PA14_RS21325	PA14_52370		hypothetical protein	0	0	0	0	0	0	0	0	-0.06	0	0	0	0	0	0	0	0	0	0	0	0	0	0	0.06	0	0	0
PA14_RS21390 →:4,659,516:V157G (GTG→GGG)	PA14_RS21390	PA14_52530		transcriptional regulator	0	0	0	0	0	0	0	-0.09	0.07	0	0	0	0	0	0	0	0	0	0	0	0	0	0.09	0	0	0	0.07
PA14_RS21390 →:4,659,525:D160V (GAC→GTC)	PA14_RS21390	PA14_52530		transcriptional regulator	0	0	0	0	-0.11	0	0	0	0	0	0	0	0	0	0	0	0.11	0	0	0	0	0	0	0	0	0	0
PA14_RS21480 ←:4,676,114:A332A (GCC→GCG)	PA14_RS21480	PA14_52760		hypothetical protein	0	0	0	0	0	0	0	0.09	0	0	0	0	0	0	0	0	0	0	0	0	0	0	0	0	0	0.09	0
PA14_RS21505 ←:4,682,117:L424V (CTG→GTG)	PA14_RS21505	PA14_52810		C4-dicarboxylate transporter	0	0	0	0	0	0	0	-0.1	0	0	0	0	0	0	0	0	0	0	0	0	0	0	0.1	0	0	0	0
PA14_RS21535 ←:4,688,950:T33S (ACC→TCC)	PA14_RS21535	PA14_52890		ring-cleaving dioxygenase	0	0	0	0.14	0	0	0	0	0	0	0	0	0	0	0	0	0	0	0.14	0	0	0	0	0	0	0	0
PA14_RS21550 → / ← PA14_RS21555:4,692,182:intergenic (+75/+59)	PA14_RS21550	PA14_52920		transcriptional regulator	0	0	0	0	0	0	0.07	0.1	0	0	0	0	0	0	0	0	0	0	0	0	0	0	0	0	0.07	0.1	0
PA14_RS21625 → / ← PA14_RS21630:4,708,136:intergenic (+13/+38)	PA14_RS21625	PA14_53110		oxidoreductase	0	0	0	-0.05	0	0	0	0	0	0	0	0	0	0	0	0.05	0	0	0	0	0	0	0	0	0	0	0
PA14_RS21625 → / ← PA14_RS21630:4,708,158:intergenic (+35/+16)	PA14_RS21625	PA14_53110		oxidoreductase	0	0	0	0	-0.06	0	0	0	0	0	0	0	0	0	0	0	0.06	0	0	0	0	0	0	0	0	0	0
PA14_RS21625 →:4,707,961:G266G (GGC→GGG)	PA14_RS21625	PA14_53110		oxidoreductase	0	0	0	0	0	0	-0.23	0	0	0	0	0	0	0	0	0	0	0	0	0	0	0.23	0	0	0	0	0
PA14_RS21730 →:4,733,395:L107R (CTG→CGG)	PA14_RS21730	PA14_53380		glycosyl transferase family protein	0	0	0	0	0	-0.07	0	0	0	0	0	0	0	0	0	0	0	0.07	0	0	0	0	0	0	0	0	0
PA14_RS21775 ←:4,743,852:A53G (GCC→GGC)	PA14_RS21775	PA14_53500		hypothetical protein	0	0	0	0	0	0.07	0	0	0	0	0	0	0	0	0	0	0	0	0	0	0.07	0	0	0	0	0	0
PA14_RS21870 →:4,763,295:E254V (GAA→GTA)	PA14_RS21870	PA14_53720		transcriptional regulator	0	0	0	0	0	0	0	0	-0.01	0	0	0	0	0	0	0	0	0	0	0	0	0	0	0.12	0	0	0.11
PA14_RS21930 ←:4,774,825:L202R (CTC→CGC)	PA14_RS21930	PA14_53850		oxidoreductase	0	0	0	-0.09	0	0	0	0	0	0	0	0	0	0	0	0.09	0	0	0	0	0	0	0	0	0	0	0
PA14_RS21930 ←:4,774,864:P189R (CCG→CGG)	PA14_RS21930	PA14_53850		oxidoreductase	0	0	0	0	0	0	0	0	0.1	0	0	0	0	0	0	0	0	0	0	0	0	0	0	0	0	0	0.1
PA14_RS21945 ←:4,777,582:P83P (CCC→CCA)	PA14_RS21945	PA14_53880		hypothetical protein	0	0	0	0	0	0	0	0.07	0	0	0	0	0	0	0	0	0	0	0	0	0	0	0	0	0	0.07	0
PA14_RS22020 →:4,797,458:D937A (GAC→GCC)	PA14_RS22020	PA14_54080		hypothetical protein	0	0	0	0	0	0	0	-0.06	0	0	0	0	0	0	0	0	0	0	0	0	0	0	0.06	0	0	0	0
PA14_RS22170 → / → PA14_RS22175:4,830,575:intergenic (+21/‑80)	PA14_RS22170	PA14_54480		hypothetical protein	0	0	0	0	0	0	0	0.13	0	0	0	0	0	0	0	0	0	0	0	0	0	0	0	0	0	0.13	0
PA14_RS22195 → / → PA14_RS22200:4,836,070:intergenic (+18/‑31)	PA14_RS22195	PA14_54540		hypothetical protein	0	0	0	0	0	0	0	0	-0.12	0	0	0	0	0	0	0	0	0	0	0	0	0	0	0.12	0	0	0
PA14_RS22195 → / → PA14_RS22200:4,836,079:intergenic (+27/‑22)	PA14_RS22195	PA14_54540		hypothetical protein	0	0	0	0	0	0	-0.17	0.23	0	0	0	0	0	0	0	0	0	0	0	0	0	0.17	0	0	0	0.23	0
PA14_RS22200 →:4,836,474:I125N (ATC→AAC)	PA14_RS22200	PA14_54550		hypothetical protein	0	0	0	0	0	0	0	0	-0.08	0	0	0	0	0	0	0	0	0	0	0	0	0	0	0.08	0	0	0
PA14_RS22275 ←:4,852,250:Y36* (TAT→TAA)	PA14_RS22275	PA14_54720		hypothetical protein	0	0	0	0	0	0	0.07	0	0	0	0	0	0	0	0	0	0	0	0	0	0	0	0	0	0.07	0	0
PA14_RS22305 →:4,855,698:M1M (ATG→TTG) †	PA14_RS22305	PA14_54790		hypothetical protein	0	0	0	0	0	0	-0.05	0	0	0	0	0	0	0	0	0	0	0	0	0	0	0.22	0	0	0.17	0	0
PA14_RS22305 →:4,855,714:R6P (CGC→CCC)	PA14_RS22305	PA14_54790		hypothetical protein	0	0	0	0	0	0	-0.12	0	0	0	0	0	0	0	0	0	0	0	0	0	0	0.12	0	0	0	0	0
PA14_RS22520 ←:4,907,527:S54T (AGC→ACC)	PA14_RS22520	PA14_55250		transcriptional regulator	0	0	0	0	0	0	0	0	-0.05	0	0	0	0	0	0	0	0	0	0	0	0	0	0	0.05	0	0	0
PA14_RS22520 ←:4,907,587:E34V (GAG→GTG)	PA14_RS22520	PA14_55250		transcriptional regulator	0	0	0	0	0	0	0	0.08	0	0	0	0	0	0	0	0	0	0	0	0	0	0	0	0	0	0.08	0
PA14_RS22550 ←:4,912,240:L186R (CTG→CGG)	PA14_RS22550	PA14_55330		hypothetical protein	0	0	0	0	0	0	-0.18	0	-0.18	0	0	0	0	0	0	0	0	0	0	0	0	0.18	0	0.18	0	0	0
PA14_RS22765 ←:4,980,039:E919A (GAG→GCG)	PA14_RS22765	PA14_55780		two-component sensor	0	0	0	-0.11	0	0.08	0.05	0	0	0	0	0	0	0	0	0.11	0	0	0	0	0.08	0.08	0	0	0.13	0	0
PA14_RS22790 ←:4,986,683:L43V (CTG→GTG)	PA14_RS22790	PA14_55840		hypothetical protein	0	0	0	0	0	0.08	0	0	0	0	0	0	0	0	0	0	0	0	0	0	0.08	0	0	0	0	0	0
PA14_RS22900 →:5,011,534:L198V (CTG→GTG)	PA14_RS22900	PA14_56110		hypothetical protein	0	0	0	-0.06	0	0	0	0	0	0	0	0	0	0	0	0.06	0	0	0	0	0	0	0	0	0	0	0
PA14_RS22965 ← / → PA14_RS22970:5,025,128:intergenic (‑202/‑74)	PA14_RS22965	PA14_56280		hypothetical protein	0	0	0	0	0	0	0	-0.14	0	0	0	0	0	0	0	0	0	0	0	0	0	0	0.14	0	0	0	0
PA14_RS23085 → / ← PA14_RS23090:5,048,237:intergenic (+28/+32)	PA14_RS23085	PA14_56660		xenobiotic reductase	0	0	0	0	0	0	0.09	0	0	0	0	0	0	0	0	0	0	0	0	0	0	0	0	0	0.09	0	0
PA14_RS23120 →:5,054,677:T280T (ACC→ACG)	PA14_RS23120	PA14_56730		hypothetical protein	0	0	0	0	0	0	0	0.07	0	0	0	0	0	0	0	0	0	0	0	0	0	0	0	0	0	0.07	0
PA14_RS23285 ← / ← PA14_RS23290:5,088,757:intergenic (‑118/+115)	PA14_RS23285	PA14_57110		hypothetical protein	0	0	0	0	0	0	-0.08	0	0	0	0	0	0	0	0	0	0	0	0	0	0	0.08	0	0	0	0	0
PA14_RS23285 ← / ← PA14_RS23290:5,088,769:intergenic (‑130/+103)	PA14_RS23285	PA14_57110		hypothetical protein	0	0	0	0	-0.15	0	0	0.11	0	0	0	0	0	0	0	0	0.15	0	0	0	0	0	0	0	0	0.11	0
PA14_RS23285 ← / ← PA14_RS23290:5,088,771:intergenic (‑132/+101)	PA14_RS23285	PA14_57110		hypothetical protein	0	0	0	0	0	0	0	0.17	-0.21	0	0	0	0	0	0	0	0	0	0	0	0	0	0	0.21	0	0.17	0
PA14_RS23305 →:5,092,615:S354R (AGC→AGG)	PA14_RS23305	PA14_57170		two-component sensor	0	0	0	0	0	0	0	-0.06	0	0	0	0	0	0	0	0	0	0	0	0	0	0	0.06	0	0	0	0
PA14_RS23320 ←:5,095,580:Q120H (CAG→CAC)	PA14_RS23320	PA14_57200		glutathione S-transferase	0	0	0	0.07	0	0	0	0	0	0	0	0	0	0	0	0	0	0	0.07	0	0	0	0	0	0	0	0
PA14_RS23320 ←:5,095,612:R110G (CGC→GGC)	PA14_RS23320	PA14_57200		glutathione S-transferase	0	0	0	-0.1	0	0	0	0	0	0	0	0	0	0	0	0.1	0	0	0	0	0	0	0	0	0	0	0
PA14_RS23605 →:5,154,379:Q168H (CAG→CAC)	PA14_RS23605	PA14_57900		hypothetical protein	0	0	0	0.06	0	0	0	0	0	0	0	0	0	0	0	0	0	0	0.06	0	0	0	0	0	0	0	0
PA14_RS23690 ←:5,167,601:L247V (CTG→GTG)	PA14_RS23690	PA14_58080		hypothetical protein	0	0	0	0	0	0	-0.07	0	0	0	0	0	0	0	0	0	0	0	0	0	0	0.07	0	0	0	0	0
PA14_RS23690 ←:5,167,609:A244G (GCG→GGG)	PA14_RS23690	PA14_58080		hypothetical protein	0	0	0	0	0	0	0.08	0	0	0	0	0	0	0	0	0	0	0	0	0	0	0	0	0	0.08	0	0
PA14_RS23860 ←:5,210,875:G309G (GGC→GGG)	PA14_RS23860	PA14_58515		hypothetical protein	0	0	0	0	0	0	0	-0.09	0.09	0	0	0	0	0	0	0	0	0	0	0	0	0	0.09	0	0	0	0.09
PA14_RS23885 ←:5,219,494:P30P (CCG→CCC)	PA14_RS23885	PA14_58570		outer membrane ferric siderophore receptor	0	0	0	0	0	0	0	0	-0.05	0	0	0	0	0	0	0	0	0	0	0	0	0	0	0.05	0	0	0
PA14_RS23945 ←:5,232,760:A233S (GCT→TCT)	PA14_RS23945	PA14_58720		hypothetical protein	0	0	0	0	0.1	0	0	0	0	0	0	0	0	0	0	0	0	0	0	0.1	0	0	0	0	0	0	0
PA14_RS23945 ←:5,232,778:D227Y (GAC→TAC)	PA14_RS23945	PA14_58720		hypothetical protein	0	0	0	0	0	0	0	-0.16	0	0	0	0	0	0	0	0	0	0	0	0	0	0	0.16	0	0	0	0
PA14_RS24005 →:5,241,596:I9F (ATC→TTC)	PA14_RS24005	PA14_58850		hypothetical protein	0	0	0	0	0	0.11	0	0	0	0	0	0	0	0	0	0	0	0	0	0	0.11	0	0	0	0	0	0
PA14_RS24005 →:5,241,618:R16P (CGC→CCC)	PA14_RS24005	PA14_58850		hypothetical protein	0	0	0	0	0	0	0	-0.07	0	0	0	0	0	0	0	0	0	0	0	0	0	0	0.07	0	0	0	0
PA14_RS24005 →:5,241,627:I19N (ATC→AAC)	PA14_RS24005	PA14_58850		hypothetical protein	0	0	0	0	0	0	0	0	0.05	0	0	0	0	0	0	0	0	0	0	0	0	0	0	0	0	0	0.05
PA14_RS24005 →:5,241,694:P41P (CCG→CCC)	PA14_RS24005	PA14_58850		hypothetical protein	0	0	0	0	0	0	0	0	0.05	0	0	0	0	0	0	0	0	0	0	0	0	0	0	0	0	0	0.05
PA14_RS24010 → / → PA14_RS24015:5,242,269:intergenic (+52/‑12)	PA14_RS24010	PA14_58860		hypothetical protein	0	0	0	0	0	0	0	-0.1	0	0	0	0	0	0	0	0	0	0	0	0	0	0	0.1	0	0	0	0
PA14_RS24120 → / → PA14_RS24125:5,264,280:intergenic (+30/‑233)	PA14_RS24120	PA14_59100		hypothetical protein	0	0	0	0	-0.1	0	0	0	0	0	0	0	0	0	0	0	0.1	0	0	0	0	0	0	0	0	0	0
PA14_RS24120 → / → PA14_RS24125:5,264,284:intergenic (+34/‑229)	PA14_RS24120	PA14_59100		hypothetical protein	0	0	0	-0.11	0	0	0	0	0	0	0	0	0	0	0	0.11	0	0	0	0	0	0	0	0	0	0	0
PA14_RS24120 →:5,263,641:P239P (CCG→CCC)	PA14_RS24120	PA14_59100		hypothetical protein	0	0	0	0	0	0	0	0	-0.1	0	0	0	0	0	0	0	0	0	0	0	0	0	0	0.1	0	0	0
PA14_RS24705 → / → PA14_RS24710:5,390,823:intergenic (+163/‑180)	PA14_RS24705	PA14_60480		hypothetical protein	0	0	0	0	0	0.05	0	0	0	0	0	0	0	0	0	0	0	0	0	0	0.05	0	0	0	0	0	0
PA14_RS24720 ← / ← PA14_RS24725:5,394,279:intergenic (‑172/+85)	PA14_RS24720	PA14_60520		hypothetical protein	0	0	0	0	0	0	0	0	0.14	0	0	0	0	0	0	0	0	0	0	0	0	0	0	0	0	0	0.14
PA14_RS24720 ← / ← PA14_RS24725:5,394,286:intergenic (‑179/+78)	PA14_RS24720	PA14_60520		hypothetical protein	0	0	0	0	0	0	0	0	-0.09	0	0	0	0	0	0	0	0	0	0	0	0	0	0	0.09	0	0	0
PA14_RS24720 ← / ← PA14_RS24725:5,394,317:intergenic (‑210/+47)	PA14_RS24720	PA14_60520		hypothetical protein	0	0	0	0.08	0	0	0	0	0	0	0	0	0	0	0	0	0	0	0.08	0	0	0	0	0	0	0	0
PA14_RS24805 ← / ← PA14_RS24810:5,413,155:intergenic (‑246/+14)	PA14_RS24805	PA14_60730		outer membrane protein	0	0	0	0	0	0	0	0	0.07	0	0	0	0	0	0	0	0	0	0	0	0	0	0	0	0	0	0.07
PA14_RS24805 ←:5,411,522:F463Y (TTC→TAC)	PA14_RS24805	PA14_60730		outer membrane protein	0	0	0	0	0	0	0	-0.08	0	0	0	0	0	0	0	0	0	0	0	0	0	0	0.08	0	0	0	0
PA14_RS24925 ← / ← PA14_RS24930:5,442,600:intergenic (‑11/+43)	PA14_RS24925	PA14_61020		hypothetical protein	0	0	0	0.07	0	0.08	0	0	0	0	0	0	0	0	0	0	0	0	0.07	0	0.08	0.07	0	0	0.07	0	0
PA14_RS24980 ←:5,453,086:T548P (ACC→CCC)	PA14_RS24980	PA14_61150		oxidoreductase	0	0	0	-0.06	0	0	0	0	0	0	0	0	0	0	0	0.06	0	0	0	0	0	0	0	0	0	0	0
PA14_RS24980 ←:5,453,124:Y535F (TAT→TTT)	PA14_RS24980	PA14_61150		oxidoreductase	0	0	0	0	0	0	0	0	0.09	0	0	0	0	0	0	0	0	0	0	0	0	0	0	0	0	0	0.09
PA14_RS25155 ← / ← hemH:5,494,335:intergenic (‑135/+145)	PA14_RS25155	PA14_61560		MFS transporter	0	0	0	0	-1	1	0	0	0	0	0	0	0	0	0	0	1	0	0	0	1	0	0	0	0	0	0
PA14_RS25155 ← / ← hemH:5,494,382:intergenic (‑182/+98)	PA14_RS25155	PA14_61560		MFS transporter	0	0	0	0	0	-0.13	0	0	0	0	0	0	0	0	0	0	0	0.13	0	0	0	0	0	0	0	0	0
PA14_RS25280 ←:5,519,010:E119V (GAG→GTG)	PA14_RS25280	PA14_61870		hypothetical protein	0	0	0	0	0	-0.08	0	0	0.08	0	0	0	0	0	0	0	0	0.08	0	0	0	0	0	0	0	0	0.08
PA14_RS25340 ←:5,532,276:*769C (TGA→TGT)	PA14_RS25340	PA14_62020		paraquat-inducible protein B-like protein	0	0	0	0	0	-0.06	0	0	0	0	0	0	0	0	0	0	0	0.06	0	0	0	0	0	0	0	0	0
PA14_RS25420 ←:5,549,163:K241* (AAG→TAG)	PA14_RS25420	PA14_62190		hypothetical protein	0	0	0	0	0	0	0	0	0.01	0	0	0	0	0	0	0	0	0	0	0	0	0	0	0.06	0	0	0.07
PA14_RS25460 ←:5,558,389:Y188N (TAC→AAC)	PA14_RS25460	PA14_62290		ABC transporter permease	0	0	0	0	0	0	0	-0.11	0	0	0	0	0	0	0	0	0	0	0	0	0	0	0.11	0	0	0	0
PA14_RS25505 →:5,567,478:E126D (GAA→GAC)	PA14_RS25505	PA14_62410		hypothetical protein	0	0	0	0	0	-0.06	0	0	0.07	0	0	0	0	0	0	0	0	0.06	0	0	0	0	0	0	0	0	0.07
PA14_RS25515 ← / → PA14_RS25520:5,569,762:intergenic (‑348/‑66)	PA14_RS25515	PA14_62430		hypothetical protein	0	0	0	0	-0.12	0	0	0	0	0	0	0	0	0	0	0	0.12	0	0	0	0	0	0	0	0	0	0
PA14_RS25535 ←:5,573,809:L106V (CTG→GTG)	PA14_RS25535	PA14_62480		hypothetical protein	0	0	0	0.16	0	0	-0.16	0	0.17	0	0	0	0	0	0	0	0	0	0.16	0	0	0.16	0	0	0	0	0.17
PA14_RS25605 →:5,591,598:E365D (GAA→GAC)	PA14_RS25605	PA14_62650		hypothetical protein	0	0	0	0	0	0	0	0	-0.05	0	0	0	0	0	0	0	0	0	0	0	0	0	0	0.05	0	0	0
PA14_RS26050 ←:5,678,931:A340G (GCG→GGG)	PA14_RS26050	PA14_63700		hypothetical protein	0	0	0	0	0	0	0	0	0.06	0	0	0	0	0	0	0	0	0	0	0	0	0	0	0	0	0	0.06
PA14_RS26085 ← / ← mgtA:5,686,016:intergenic (‑61/+37)	PA14_RS26085	PA14_63780		hypothetical protein	0	0	0	-0.06	0	0	0	0	-0.05	0	0	0	0	0	0	0.06	0	0	0	0	0	0	0	0.05	0	0	0
PA14_RS26085 ←:5,685,901:A19P (GCG→CCG)	PA14_RS26085	PA14_63780		hypothetical protein	0	0	0	0	0	-0.11	0	0	0	0	0	0	0	0	0	0	0	0.11	0	0	0	0	0	0	0	0	0
PA14_RS26085 ←:5,685,909:L16Q (CTG→CAG)	PA14_RS26085	PA14_63780		hypothetical protein	0	0	0	0	0	-0.08	0	0	0	0	0	0	0	0	0	0	0	0.08	0	0	0	0	0	0	0	0	0
PA14_RS26185 →:5,709,103:M223L (ATG→TTG)	PA14_RS26185	PA14_64060		chemotaxis transducer	0	0	0	0	0	0	0	-0.07	0	0	0	0	0	0	0	0	0	0	0	0	0	0	0.07	0	0	0	0
PA14_RS26295 →:5,734,601:D7A (GAC→GCC)	PA14_RS26295	PA14_64360		hypothetical protein	0	0	0	0	0	0	0	0	0.09	0	0	0	0	0	0	0	0	0	0	0	0	0	0	0	0	0	0.09
PA14_RS26330 ← / → PA14_RS26335:5,741,597:intergenic (‑193/‑15)	PA14_RS26330	PA14_64440		hypothetical protein	0	0	0	0	-0.08	0	0	0	0	0	0	0	0	0	0	0	0.08	0	0	0	0	0	0	0	0	0	0
PA14_RS26335 → / ← PA14_RS26340:5,742,941:intergenic (+64/+92)	PA14_RS26335	PA14_64450		heat-shock protein	0	0	0	0	0	0	-0.1	0	0	0	0	0	0	0	0	0	0	0	0	0	0	0.1	0	0	0	0	0
PA14_RS26335 → / ← PA14_RS26340:5,742,944:intergenic (+67/+89)	PA14_RS26335	PA14_64450		heat-shock protein	0	0	0	0	0	0	0	1	0	0	0	0	0	0	0	0	0	0	0	0	0	0	0	0	0	1	0
PA14_RS26335 → / ← PA14_RS26340:5,742,946:intergenic (+69/+87)	PA14_RS26335	PA14_64450		heat-shock protein	0	0	0	0	0	0.29	0	0.46	-0.31	0	0	0	0	0	0	0	0	0	0	0	0.29	0	0	0.31	0	0.46	0
PA14_RS26335 → / ← PA14_RS26340:5,742,948:intergenic (+71/+85)	PA14_RS26335	PA14_64450		heat-shock protein	0	0	0	0	0	0	-0.2	0	0	0	0	0	0	0	0	0	0	0	0	0	0	0.2	0	0	0	0	0
PA14_RS26335 → / ← PA14_RS26340:5,742,958:intergenic (+81/+75)	PA14_RS26335	PA14_64450		heat-shock protein	0	0	0	0	0	0	0	1	0	0	0	0	0	0	0	0	0	0	0	0	0	0	0	0	0	1	0
PA14_RS26335 → / ← PA14_RS26340:5,742,978:intergenic (+101/+55)	PA14_RS26335	PA14_64450		heat-shock protein	0	0	0	0	0	0	0	0.16	0	0	0	0	0	0	0	0	0	0	0	0	0	0	0	0	0	0.16	0
PA14_RS26335 →:5,741,666:S19T (TCC→ACC)	PA14_RS26335	PA14_64450		heat-shock protein	0	0	0	0.09	0	0	0	0	0	0	0	0	0	0	0	0	0	0	0.09	0	0	0	0	0	0	0	0
PA14_RS26335 →:5,742,711:D367A (GAC→GCC)	PA14_RS26335	PA14_64450		heat-shock protein	0	0	0	0	-0.07	0	0	0.08	0	0	0	0	0	0	0	0	0.07	0	0	0	0	0	0	0	0	0.08	0
PA14_RS26405 ← / ← PA14_RS26410:5,755,342:intergenic (‑168/+52)	PA14_RS26405	PA14_64590		MFS transporter	0	0	0	0	0	-0.07	0.06	0	0	0	0	0	0	0	0	0	0	0.07	0	0	0	0	0	0	0.06	0	0
PA14_RS26405 ← / ← PA14_RS26410:5,755,356:intergenic (‑182/+38)	PA14_RS26405	PA14_64590		MFS transporter	0	0	0	-0.07	0	0	0	0	0	0	0	0	0	0	0	0.07	0	0	0	0	0	0	0	0	0	0	0
PA14_RS26485 ←:5,772,754:D442V (GAC→GTC)	PA14_RS26485	PA14_64790		MFS transporter	0	0	0	0	0	0	0	-0.06	0	0	0	0	0	0	0	0	0	0	0	0	0	0	0.06	0	0	0	0
PA14_RS26485 ←:5,773,057:L341R (CTG→CGG)	PA14_RS26485	PA14_64790		MFS transporter	0	0	0	0	0.17	0	0	0	0	0	0	0	0	0	0	0	0	0	0	0.17	0	0	0	0	0	0	0
PA14_RS26485 ←:5,773,466:R205G (CGC→GGC)	PA14_RS26485	PA14_64790		MFS transporter	0	0	0	0	0	0	0	0.1	0	0	0	0	0	0	0	0	0	0	0	0	0	0	0	0	0	0.1	0
PA14_RS26505 ←:5,777,625:G131R (GGG→CGG)	PA14_RS26505	PA14_64840		short-chain dehydrogenase	0	0	0	0	0	0	0	0	0.11	0	0	0	0	0	0	0	0	0	0	0	0	0	0	0	0	0	0.11
PA14_RS26510 ← / ← PA14_RS26515:5,779,326:intergenic (‑60/+11)	PA14_RS26510	PA14_64850		ornithine cyclodeaminase	0	0	0	0	0	0	-0.07	0	0	0	0	0	0	0	0	0	0	0	0	0	0	0.07	0	0	0	0	0
PA14_RS26770 →:5,834,995:M1M (ATG→CTG) †	PA14_RS26770	PA14_65520		hypothetical protein	0	0	0	0	0	0	0	-0.11	0	0	0	0	0	0	0	0	0	0	0	0	0	0	0.11	0	0	0	0
PA14_RS26770 →:5,836,502:L503Q (CTG→CAG)	PA14_RS26770	PA14_65520		hypothetical protein	0	0	0	-0.11	0	0	0	-0.11	0	0	0	0	0	0	0	0.11	0	0	0	0	0	0	0.11	0	0	0	0
PA14_RS26830 ←:5,851,382:S41A (TCG→GCG)	PA14_RS26830	PA14_65700		hypothetical protein	0	0	0	0	-0.16	0	0	0	0	0	0	0	0	0	0	0	0.16	0	0	0	0	0	0	0	0	0	0
PA14_RS26830 ←:5,851,382:S41A (TCG→GCG) ‡	PA14_RS26830	PA14_65700		hypothetical protein	0	0	0	0	0	0	-0.18	0	0	0	0	0	0	0	0	0	0	0	0	0	0	0.18	0	0	0	0	0
PA14_RS26830 ←:5,851,397:R36G (CGC→GGC)	PA14_RS26830	PA14_65700		hypothetical protein	0	0	0	0	0	0.02	-0.08	-0.09	0	0	0	0	0	0	0	0	0	0.08	0	0	0.1	0.08	0.09	0	0	0	0
PA14_RS26840 → / ← thiC:5,853,118:intergenic (+19/+40)	PA14_RS26840	PA14_65720		lipoprotein	0	0	0	0	0	0	-0.07	0	0	0	0	0	0	0	0	0	0	0	0	0	0	0.07	0	0	0	0	0
PA14_RS26840 → / ← thiC:5,853,125:intergenic (+26/+33)	PA14_RS26840	PA14_65720		lipoprotein	0	0	0	0	0	0	0	-0.13	0	0	0	0	0	0	0	0	0	0	0	0	0	0	0.13	0	0	0	0
PA14_RS26840 → / ← thiC:5,853,129:intergenic (+30/+29)	PA14_RS26840	PA14_65720		lipoprotein	0	0	0	0	0	0	0	0	0.16	0	0	0	0	0	0	0	0	0	0	0	0	0	0	0	0	0	0.16
PA14_RS26855 ←:5,857,026:Q230H (CAG→CAC)	PA14_RS26855	PA14_65760		NAD(P)H quinone oxidoreductase	0	0	0	0	-0.1	0	0	0	0	0	0	0	0	0	0	0	0.1	0	0	0	0	0	0	0	0	0	0
PA14_RS26855 ←:5,857,039:D226A (GAC→GCC)	PA14_RS26855	PA14_65760		NAD(P)H quinone oxidoreductase	0	0	0	0	0	0	-0.07	0	0	0	0	0	0	0	0	0	0	0	0	0	0	0.07	0	0	0	0	0
PA14_RS26855 ←:5,857,064:R218G (CGG→GGG)	PA14_RS26855	PA14_65760		NAD(P)H quinone oxidoreductase	0	0	0	0	0	0	-0.11	0	0	0	0	0	0	0	0	0	0	0	0	0	0	0.11	0	0	0	0	0
PA14_RS26870 ←:5,860,754:L677M (TTG→ATG)	PA14_RS26870	PA14_65810		hypothetical protein	0	0	0	0	0	0	-0.07	-0.09	0	0	0	0	0	0	0	0	0	0	0	0	0	0.07	0.09	0	0	0	0
PA14_RS26870 ←:5,860,788:H665Q (CAT→CAA)	PA14_RS26870	PA14_65810		hypothetical protein	0	0	0	0	0	0	0	-0.13	0	0	0	0	0	0	0	0	0	0	0	0	0	0	0.13	0	0	0	0
PA14_RS26880 ← / ← PA14_RS26885:5,865,015:intergenic (‑194/+65)	PA14_RS26880	PA14_65840		enoyl-CoA hydratase/isomerase	0	0	0	0	0	0	-0.11	0	-0.08	0	0	0	0	0	0	0	0	0	0	0	0	0.11	0	0.08	0	0	0
PA14_RS26880 ← / ← PA14_RS26885:5,865,026:intergenic (‑205/+54)	PA14_RS26880	PA14_65840		enoyl-CoA hydratase/isomerase	0	0	0	0	0	0	0	-0.1	0	0	0	0	0	0	0	0	0	0	0	0	0	0	0.1	0	0	0	0
PA14_RS26900 ← / ← PA14_RS26905:5,870,486:intergenic (‑47/+71)	PA14_RS26900	PA14_65880		two-component response regulator	0	0	0	-0.08	0	0	0	0	0	0	0	0	0	0	0	0.08	0	0	0	0	0	0	0	0	0	0	0
PA14_RS26900 ← / ← PA14_RS26905:5,870,489:intergenic (‑50/+68)	PA14_RS26900	PA14_65880		two-component response regulator	0	0	0	-0.11	0	0	-0.11	0	-0.11	0	0	0	0	0	0	0.11	0	0	0	0	0	0.11	0	0.11	0	0	0
PA14_RS27015 ←:5,896,897:G294R (GGC→CGC)	PA14_RS27015	PA14_66190		hypothetical protein	0	0	0	0	0	0	0	0	-0.06	0	0	0	0	0	0	0	0	0	0	0	0	0	0	0.06	0	0	0
PA14_RS27015 ←:5,896,899:D293A (GAC→GCC)	PA14_RS27015	PA14_66190		hypothetical protein	0	0	0	0	0	0	0.13	0	0	0	0	0	0	0	0	0	0	0	0	0	0	0	0	0	0.13	0	0
PA14_RS27015 ←:5,896,904:Y291* (TAC→TAA) ‡	PA14_RS27015	PA14_66190		hypothetical protein	0	0	0	0	0.12	0	0.05	-0.07	0.05	0	0	0	0	0	0	0	0	0	0	0.12	0	0	0.07	0	0.05	0	0.05
PA14_RS27015 ←:5,896,906:Y291N (TAC→AAC) ‡	PA14_RS27015	PA14_66190		hypothetical protein	0	0	0	0	0.1	0	0.1	-0.08	0.06	0	0	0	0	0	0	0	0	0	0	0.1	0	0	0.08	0	0.1	0	0.06
PA14_RS27015 ←:5,896,908:V290D (GTC→GAC)	PA14_RS27015	PA14_66190		hypothetical protein	0	0	0	0	0	0	0.06	0	0	0	0	0	0	0	0	0	0	0	0	0	0	0	0	0	0.06	0	0
PA14_RS27015 ←:5,896,921:A286P (GCC→CCC)	PA14_RS27015	PA14_66190		hypothetical protein	0	0	0	0	0	0.09	0	0	0	0	0	0	0	0	0	0	0	0	0	0	0.09	0	0	0	0	0	0
PA14_RS27015 ←:5,896,926:L284Q (CTG→CAG)	PA14_RS27015	PA14_66190		hypothetical protein	0	0	0	0.13	0	0.13	0	0	-0.14	0	0	0	0	0	0	0	0	0	0.13	0	0.13	0	0	0.14	0	0	0
PA14_RS27015 ←:5,896,938:D280V (GAC→GTC)	PA14_RS27015	PA14_66190		hypothetical protein	0	0	0	0	-0.1	0	0	0	0	0	0	0	0	0	0	0	0.1	0	0	0	0	0	0	0	0	0	0
PA14_RS27015 ←:5,896,963:E272Q (GAG→CAG)	PA14_RS27015	PA14_66190		hypothetical protein	0	0	0	0	-0.12	0	0	-0.09	0	0	0	0	0	0	0	0	0.12	0	0	0	0	0	0.09	0	0	0	0
PA14_RS27015 ←:5,897,421:A119G (GCG→GGG)	PA14_RS27015	PA14_66190		hypothetical protein	0	0	0	0	0	0	-0.15	0	0	0	0	0	0	0	0	0	0	0	0	0	0	0.15	0	0	0	0	0
PA14_RS27090 → / → mscK:5,920,853:intergenic (+26/‑66)	PA14_RS27090	PA14_66380		potassium/proton antiporter	0	0	0	0	0	0	0	0	0.11	0	0	0	0	0	0	0	0	0	0	0	0	0	0	0	0	0	0.11
PA14_RS27100 →:5,925,357:L339R (CTG→CGG)	PA14_RS27100	PA14_66410		hypothetical protein	0	0	0	0	0	0	0	0	-0.09	0	0	0	0	0	0	0	0	0	0	0	0	0	0	0.09	0	0	0
PA14_RS27130 ←:5,931,475:I36N (ATC→AAC)	PA14_RS27130	PA14_66490		LysR family transcriptional regulator	0	0	0	0	0	0	0	0	0.07	0	0	0	0	0	0	0	0	0	0	0	0	0	0	0	0	0	0.07
PA14_RS27130 ←:5,931,504:G26G (GGG→GGT)	PA14_RS27130	PA14_66490		LysR family transcriptional regulator	0	0	0	0	0	0	0	0	0.1	0	0	0	0	0	0	0	0	0	0	0	0	0	0	0	0	0	0.1
PA14_RS27225 ←:5,958,274:I52I (ATC→ATA)	PA14_RS27225	PA14_66700		nuclease	0	0	0	0	0	0	-0.06	0	0	0	0	0	0	0	0	0	0	0	0	0	0	0.06	0	0	0	0	0
PA14_RS27405 ←:5,994,066:V279G (GTC→GGC)	PA14_RS27405	PA14_67150		oxidoreductase	0	0	0	0	0	0.06	0	0	0	0	0	0	0	0	0	0	0	0	0	0	0.06	0	0	0	0	0	0
PA14_RS27445 ←:6,006,412:S498I (AGT→ATT)	PA14_RS27445	PA14_67260		histidine/phenylalanine ammonia-lyase	0	0	0	0	0.09	0	0	0	0	0	0	0	0	0	0	0	0	0	0	0.09	0	0	0	0	0	0	0
PA14_RS27465 ←:6,010,931:R388P (CGC→CCC)	PA14_RS27465	PA14_67310		amino acid permease	0	0	0	0	0	0	0.09	0	0	0	0	0	0	0	0	0	0	0	0	0	0	0	0	0	0.09	0	0
PA14_RS27510 → / ← PA14_RS27515:6,023,150:intergenic (+79/+64)	PA14_RS27510	PA14_67440		N-formimino-L-glutamate deiminase	0	0	0	0	0	0	0	0	0.02	0	0	0	0	0	0	0	0	0	0	0	0	0	0	0.05	0	0	0.07
PA14_RS27560 →:6,034,801:K133N (AAG→AAC)	PA14_RS27560	PA14_67550		transcriptional regulator	0	0	0	0	0	0	0	0.04	0.11	0	0	0	0	0	0	0	0	0	0	0	0	0	0.08	0	0	0.12	0.11
PA14_RS27585 ← / → PA14_RS27590:6,042,979:intergenic (‑77/‑211)	PA14_RS27585	PA14_67630		hypothetical protein	0	0	0	0	0	0	0	-0.08	0	0	0	0	0	0	0	0	0	0	0	0	0	0	0.08	0	0	0	0
PA14_RS27585 ← / → PA14_RS27590:6,042,998:intergenic (‑96/‑192)	PA14_RS27585	PA14_67630		hypothetical protein	0	0	0	0	0	0	0.09	0	0	0	0	0	0	0	0	0	0	0	0	0	0	0	0	0	0.09	0	0
PA14_RS27585 ← / → PA14_RS27590:6,043,003:intergenic (‑101/‑187)	PA14_RS27585	PA14_67630		hypothetical protein	0	0	0	0	0	0	0	-0.1	0	0	0	0	0	0	0	0	0	0	0	0	0	0	0.1	0	0	0	0
PA14_RS27585 ← / → PA14_RS27590:6,043,010:intergenic (‑108/‑180)	PA14_RS27585	PA14_67630		hypothetical protein	0	0	0	0	0	0	-0.06	-0.06	0	0	0	0	0	0	0	0	0	0	0	0	0	0.06	0.06	0	0	0	0
PA14_RS27585 ← / → PA14_RS27590:6,043,040:intergenic (‑138/‑150)	PA14_RS27585	PA14_67630		hypothetical protein	0	0	0	0	0	0	0	-0.07	0	0	0	0	0	0	0	0	0	0	0	0	0	0	0.07	0	0	0	0
PA14_RS27585 ←:6,041,693:G404R (GGC→CGC)	PA14_RS27585	PA14_67630		hypothetical protein	0	0	0	0	0	0	-0.07	0	0	0	0	0	0	0	0	0	0	0	0	0	0	0.07	0	0	0	0	0
PA14_RS27585 ←:6,041,708:S399C (AGT→TGT)	PA14_RS27585	PA14_67630		hypothetical protein	0	0	0	0.1	0	0	0	0	0	0	0	0	0	0	0	0	0	0	0.1	0	0	0	0	0	0	0	0
PA14_RS27585 ←:6,041,761:A381G (GCG→GGG)	PA14_RS27585	PA14_67630		hypothetical protein	0	0	0	0.08	0	0	0	0	0	0	0	0	0	0	0	0	0	0	0.08	0	0	0	0	0	0	0	0
PA14_RS27585 ←:6,042,788:L39V (TTG→GTG)	PA14_RS27585	PA14_67630		hypothetical protein	0	0	0	0	0	-0.06	0	0	0	0	0	0	0	0	0	0	0	0.06	0	0	0	0	0	0	0	0	0
PA14_RS27670 ←:6,059,725:V16V (GTC→GTG)	PA14_RS27670	PA14_67850		ABC-type amino acid transport protein, periplasmic component	0	0	0	-0.07	0	0	0	0	0	0	0	0	0	0	0	0.07	0	0	0	0	0	0	0	0	0	0	0
PA14_RS27760 → / → PA14_RS27765:6,074,295:intergenic (+58/‑4)	PA14_RS27760	PA14_68070		periplasmic binding protein	0	0	0	0	0	0	0	0	-0.05	0	0	0	0	0	0	0	0	0	0	0	0	0	0	0.05	0	0	0
PA14_RS27760 → / → PA14_RS27765:6,074,297:intergenic (+60/‑2)	PA14_RS27760	PA14_68070		periplasmic binding protein	0	0	0	0	0	0.08	0	0	0	0	0	0	0	0	0	0	0	0	0	0	0.08	0	0	0	0	0	0
PA14_RS27760 →:6,074,228:S248R (AGC→AGA)	PA14_RS27760	PA14_68070		periplasmic binding protein	0	0	0	0	0	0	0	0.06	0	0	0	0	0	0	0	0	0	0	0	0	0	0	0	0	0	0.06	0
PA14_RS27845 → / → arcD:6,092,451:intergenic (+163/‑635)	PA14_RS27845	PA14_68290		C4-dicarboxylate transporter	0	0	0	0	0	-0.07	0	-0.06	0	0	0	0	0	0	0	0	0	0.07	0	0	0	0	0.06	0	0	0	0
PA14_RS27845 → / → arcD:6,092,529:intergenic (+241/‑557)	PA14_RS27845	PA14_68290		C4-dicarboxylate transporter	0	0	0	0	0	0	-0.09	0	0	0	0	0	0	0	0	0	0	0	0	0	0	0.09	0	0	0	0	0
PA14_RS27870 →:6,098,921:A193P (GCC→CCC)	PA14_RS27870	PA14_68360		beta-ketoacyl synthase	0	0	0	0	0	0	0	0	-0.06	0	0	0	0	0	0	0	0	0	0	0	0	0	0	0.06	0	0	0
PA14_RS28010 →:6,126,367:E191D (GAA→GAC)	PA14_RS28010	PA14_68710		hypothetical protein	0	0	0	0	0.06	0	0	0	0	0	0	0	0	0	0	0	0	0	0	0.06	0	0	0	0	0	0	0
PA14_RS28055 →:6,137,503:L22V (CTG→GTG)	PA14_RS28055	PA14_68820		secretion pathway ATPase	0	0	0	0	0	-0.1	0	0	0	0	0	0	0	0	0	0	0	0.1	0	0	0	0	0	0	0	0	0
PA14_RS28065 → / ← PA14_RS28070:6,140,386:intergenic (+27/+8)	PA14_RS28065	PA14_68840		hypothetical protein	0	0	0	0.1	0	0	0	0	0	0	0	0	0	0	0	0	0	0	0.1	0	0	0	0	0	0	0	0
PA14_RS28130 ←:6,155,633:L53Q (CTG→CAG)	PA14_RS28130	PA14_69010		hypothetical protein	0	0	0	0	0	0	-0.06	0	-0.07	0	0	0	0	0	0	0	0	0	0	0	0	0.06	0	0.07	0	0	0
PA14_RS28240 ← / ← PA14_RS28245:6,180,588:intergenic (‑45/+22)	PA14_RS28240	PA14_69280		hypothetical protein	0	0	0	0	0	0	0	0	-0.07	0	0	0	0	0	0	0	0	0	0	0	0	0	0	0.07	0	0	0
PA14_RS28265 ←:6,185,052:K561N (AAG→AAC)	PA14_RS28265	PA14_69340		ABC transporter ATP-binding protein	0	0	0	0	0	0	0	-0.05	0	0	0	0	0	0	0	0	0	0	0	0	0	0	0.05	0	0	0	0
PA14_RS28340 ←:6,203,138:N242K (AAT→AAA)	PA14_RS28340	PA14_69540		hypothetical protein	0	0	0	0	0	-0.06	0	-0.01	0	0	0	0	0	0	0	0	0	0.06	0	0	0	0	0.08	0	0	0.07	0
[truncated: 617 more rows]
