# Supplementary material for: Metabolic basis for the evolution of a common pathogenic Pseudomonas aeruginosa variant
Source: eLife. 2022 May 3;11:e76555. doi: 10.7554/eLife.76555 (PMC9224983; doi:10.7554/eLife.76555)
Supplement: Supplementary file 2. — Number of replicates (three possible) with no LasR- phenotypes observed at time of plating in LB microtiter evolution assay for each clean deletion mutant. The locus tag, gene length, start and stop genomic position, gene name indicated were used to generate Circos plot shown in Figure 2—figure supplement 1. Deletion mutants that displayed no LasR- phenotypes across all three replicates were followed up in a secondary 5 mL LB evolution assay. [file elife-76555-supp2.xlsx]

## Sheet: Note
Supplementary File 2. Evolution screen for spontaneous LasR- strains in kinase deletion mutant backgrounds. Number of replicates (three possible) with no LasR- phenotypes observed at time of plating in LB microtiter evolution assay for each clean deletion mutant. The locus tag, gene length, start and stop genomic position, gene name indicated were used to generate Circos plot shown in Figure 2 – …

## Sheet: PA14_kinase_screen_genes_only
Locus Tag of Deletion Mutant	Length (nucleotides)	Start	End	Gene Deleted	Replicates with LasR- colonies
PA14_10770	4254	927751	932004	PA14_10770	0
PA14_50200	1209	4459551	4460759	fleS	0
PA14_52260	2778	4635805	4638582	gacS	0
PA14_62530	2952	5575942	5578893	cbrA	0
PA14_64580	1392	5752476	5753867	PA14_64580	0
PA14_11630	2301	1007379	1009679	PA14_11630	1
PA14_16470	2310	1409737	1412046	wspE	1
PA14_27800	1332	2409545	2410876	copS	1
PA14_29740	1338	2574563	2575900	bqsS	1
PA14_31950	1419	2781439	2782857	czcS	1
PA14_38910	651	3468329	3468979	exaD	1
PA14_49170	1347	4369305	4370651	phoQ	1
PA14_64230	2829	5722815	5725643	retS	1
PA14_65860	2313	5866676	5868988	aruS	1
PA14_67670	1077	6044551	6045627	ntrB	1
PA14_70760	1332	6300460	6301791	phoR	1
PA14_05390	7431	468864	476294	chpA	2
PA14_10700	2187	921046	923232	bphP	2
PA14_12820	3639	1098155	1101793	rocS1	2
PA14_13740	1869	1178774	1180642	narX	2
PA14_19340	2757	1667396	1670152	PA14_19340	2
PA14_21700	3480	1883722	1887201	mxtR	2
PA14_22730	1338	1976668	1978005	cpxS	2
PA14_22960	1422	1990360	1991781	gtrS	2
PA14_26810	1116	2333988	2335103	PA14_26810	2
PA14_30700	2979	2661144	2664122	PA14_30700	2
PA14_30840	1413	2676132	2677544	PA14_30840	2
PA14_32570	1323	2827632	2828954	PA14_32570	2
PA14_36420	2100	3243835	3245934	PA14_36420	2
PA14_38970	2646	3471184	3473829	ercS'	2
PA14_41270	1287	3682952	3684238	parS	2
PA14_43670	1956	3887946	3889901	PA14_43670	2
PA14_49420	1359	4391560	4392918	PA14_49420	2
PA14_52240	1338	4633563	4634900	pirS	2
PA14_56940	1281	5074423	5075703	colS	2
PA14_57170	2097	5091554	5093650	PA14_57170	2
PA14_60250	1593	5365845	5367437	pilS	2
PA14_63160	1434	5636684	5638117	pmrB	2
PA14_68230	1839	6085898	6087736	PA14_68230	2
PA14_69480	1077	6195509	6196585	algZ	2
PA14_07820	2394	673136	675529	uhpB	2
PA14_02250	1920	201007	202926	cheA	3
PA14_06070	1425	536757	538181	creC	3
PA14_09680	2277	830905	833181	bfiS	3
PA14_24340	1296	2115489	2116784	PA14_24340	3
PA14_24720	2226	2160811	2163036	rocS2	3
PA14_27550	2361	2389932	2392292	sagS	3
PA14_29360	1341	2541769	2543109	pfeS	3
PA14_38740	1785	3454285	3456069	ercS	3
PA14_43350	2658	3860306	3862963	kdpD	3
PA14_45590	2262	4054930	4057191	PA14_45590	3
PA14_45870	1446	4074936	4076381	PA14_45870	3
PA14_46370	1623	4125450	4127072	PA14_46370	3
PA14_46980	1902	4184198	4186099	PA14_46980	3
PA14_48160	2577	4286772	4289348	PA14_48160	3
PA14_54500	1383	4831499	4832881	tctE	3
PA14_55780	2769	4980026	4982794	pprA	3
PA14_58320	1269	5192561	5193829	roxS	3
PA14_59780	3255	5320295	5323549	rcsC	3
PA14_59800	2796	5324826	5327621	pvrS	3
PA14_68680	1320	6123449	6124768	amgS/envZ	3
PA14_72390	1788	6447605	6449392	kinB	3
PA14_72740	1767	6477682	6479448	PA14_72740	3
