# Supplementary material for: Metabolic basis for the evolution of a common pathogenic Pseudomonas aeruginosa variant
Source: eLife. 2022 May 3;11:e76555. doi: 10.7554/eLife.76555 (PMC9224983; doi:10.7554/eLife.76555)
Supplement: Supplementary file 4. — Values listed for each biochemical are normalized and imputed as described in the methods section. The percent forced expiratory volume in 1 s is noted for samples from people with CF as part of the column title. For Non-CF samples, column labels are listed numerically with ‘Non-CF’ indicator. Counts are shown per sample, as the average across CF (n = 10) and non-CF (n = 10) samples and as ratio of the averages between CF and non-CF as well. Information on (sub)pathway, biochemical identifiers, and methodology shown per biochemical. [file elife-76555-supp4.xlsx]

## Sheet: Notes
Supplementary File 4. Relative metabolite counts in bronchioalveolar lavage fluid from people with cystic fibrosis (CF) and non-CF comparators by LC/MS. Values listed for each biochemical are normalized and imputed as described in the methods section. The percent forced expiratory volume in one second is noted for samples from people with CF as part of the column title. For Non-CF samples, column…

## Sheet: BAL_FEV
BIOCHEMICAL	SUPER PATHWAY	SUB PATHWAY	COMP ID	PLATFORM	CHEMICAL ID	RI	MASS	PUBCHEM	CAS	KEGG	non-CF 1	non-CF 2	non-CF 3	non-CF 4	non-CF 5	non-CF 6	non-CF 7	non-CF 8	non-CF 9	non-CF 10	FEV1 113	FEV1 92	FEV1 91	FEV1 91	FEV1 61	FEV1 112	FEV1 77	FEV1 76	FEV1 59	FEV1 63	Average non-CF	Average CF	average cf/average non-cf
N6,N6,N6-trimethyllysine	Amino Acid	Lysine Metabolism	1498	LC/MS Pos Early	189	2825	189.16	440120	23284-33-5	C03793	0.0565	0.0565	0.0565	0.0565	0.2187	0.0565	0.0565	0.0649	0.0565	0.0565	0.0565	2.3248	0.2575	1.0569	3.6202	0.1884	0.9431	2.0294	18.8916	52.8024	0.07356	8.21708	111.706
glycylvaline	Peptide	Dipeptide	18357	LC/MS Pos Early	100000487	2734	175.108	2724807	1963-21-9		0.0405	0.0405	0.0405	0.0405	0.0405	0.0405	0.0405	0.0405	0.0405	0.0405	0.0405	1.7517	0.193	0.8534	1.8277	0.1829	0.3335	1.1466	7.8833	23.6809	0.0405	3.78935	93.5642
X - 25768			63537	LC/MS Neg							0.0401	0.0401	0.0401	0.0401	0.0401	0.0401	0.0401	0.0401	0.0401	0.0401	0.0401	2.7203	0.1626	0.6275	1.7162	0.196	0.1552	1.3725	6.3305	23.2205	0.0401	3.65414	91.1257
2'-deoxyinosine	Nucleotide	Purine Metabolism, (Hypo)Xanthine/Inosine containing	15076	LC/MS Neg	100000135	1688	251.079	135398593	890-38-0	C05512	0.152	0.152	0.152	0.152	0.152	0.152	0.152	0.152	0.152	0.152	0.152	10.5393	0.9124	0.7069	7.0198	0.152	0.1844	1	3.1741	95.3049	0.152	11.9146	78.3854
N6,N6-dimethyllysine	Amino Acid	Lysine Metabolism	62862	LC/MS Pos Early	100020417	2831	175.144	193344	2259-86-1	C05545	0.0563	0.0563	0.0563	0.0563	0.0563	0.0563	0.0563	0.0563	0.0563	0.0563	0.0563	1.2796	0.147	0.7204	2.3355	0.1298	0.6159	1.3077	10.321	19.6079	0.0563	3.65211	64.8687
methionine sulfoxide	Amino Acid	Methionine, Cysteine, SAM and Taurine Metabolism	18374	LC/MS Pos Early	100000039	1272	166.053	158980	3226-65-1	C02989	0.1008	0.0818	0.1324	0.098	1.3974	0.1454	0.1027	0.0818	0.1028	0.0878	0.0835	8.4698	1	2.322	8.8572	1.1869	3.0418	9.6115	45.4947	65.4238	0.23309	14.5491	62.4185
2'-deoxyguanosine	Nucleotide	Purine Metabolism, Guanine containing	1411	LC/MS Neg	348	1700	266.089	135398592	961-07-9	C00330	0.1124	0.1124	0.1124	0.1124	0.1124	0.1124	0.1124	0.1124	0.1124	0.1124	0.1124	6.2521	0.637	0.6329	4.0525	0.1124	0.1229	1	1.3255	50.8304	0.1124	6.50781	57.8987
glutamine conjugate of C6H10O2 (2)*	Partially Characterized Molecules	Partially Characterized Molecules	63660	LC/MS Pos Early	100020262	2383	243.134				0.0562	0.0562	0.0562	0.0562	0.0562	0.0562	0.0562	0.0562	0.0562	0.0562	0.0562	2.0229	0.1714	0.6633	1.9267	0.2222	0.1384	1.3367	6.0519	17.0335	0.0562	2.96232	52.7103
methionine	Amino Acid	Methionine, Cysteine, SAM and Taurine Metabolism	1302	LC/MS Polar	415	1871.8	148.044	6137	63-68-3	C00073	0.1784	0.267	0.2358	0.1784	0.4077	0.1784	0.2319	0.1784	0.2296	0.1784	0.1784	2.9315	1	3.927	14.2647	0.3541	2.1367	1.1363	20.6711	60.2216	0.2264	10.6821	47.1826
diglycerol	Xenobiotics	Chemical	40700	LC/MS Pos Early	100003700	818	167.091	42953	627-82-7		1.0913	0.3541	0.3541	0.5003	2.5282	0.5148	0.3541	0.6948	0.3541	0.797	0.3541	0.3541	0.3541	0.8631	6.6703	0.9087	5.0711	1.674	162.997	172.62	0.75428	35.1866	46.6493
N1,N12-diacetylspermine	Amino Acid	Polyamine Metabolism	52987	LC/MS Pos Early	100002132	3105	287.244	132680	61345-83-3	C03413	0.1502	0.1502	0.1502	0.1502	0.1502	0.1502	0.1502	0.1502	0.1502	0.1502	0.1502	1	0.589	1.6187	4.8484	0.1502	0.5209	0.9838	15.5125	44.436	0.1502	6.98097	46.4778
cysteinylglycine disulfide*	Amino Acid	Glutathione Metabolism	62103	LC/MS Pos Early	100002466	2547	298.053	22833544	70555-24-7		0.1096	0.1096	0.1096	0.1096	0.1096	0.1096	0.1096	0.1096	0.1096	0.1096	0.1096	3.0657	0.437	0.9327	1	0.5302	0.1096	1.7658	4.7524	36.2155	0.1096	4.89185	44.6337
valine	Amino Acid	Leucine, Isoleucine and Valine Metabolism	1649	LC/MS Pos Early	566	2479	118.086	6287	72-18-4	C00183	0.2101	0.1313	0.8297	0.1884	1.1703	0.4665	0.3935	0.264	0.3697	0.1991	0.6436	7.3199	2.372	5.9362	17.8218	1.2095	4.5108	5.2873	40.8704	100.774	0.42226	18.6746	44.2253
X - 19929			47378	LC/MS Neg							0.0908	0.0908	0.0908	0.0908	0.0908	0.0908	0.0908	0.0908	0.0908	0.0908	0.0908	2.286	0.1307	0.6225	1.5248	0.1891	0.2118	1.3775	6.1636	26.1285	0.0908	3.87253	42.649
N-acetylthreonine	Amino Acid	Glycine, Serine and Threonine Metabolism	33939	LC/MS Neg	100001274	821.6	160.061	152204	17093-74-2		0.119	0.1534	0.2044	0.119	1.232	0.2187	0.119	0.1989	0.119	0.1348	0.119	2.5399	0.768	2.3364	7.4695	0.5319	1.6654	1.7016	21.9638	70.5437	0.26182	10.9639	41.8758
N(1)-acetylspermine	Amino Acid	Polyamine Metabolism	32360	LC/MS Pos Early	1200	3356	245.234	496;916	77928-70-2	C02567	0.1216	0.1216	0.1216	0.1216	0.1216	0.1216	0.1216	0.1216	0.1216	0.1216	0.1216	1	0.6582	2.3849	5.7497	0.1216	0.7797	0.8148	10.5635	27.5082	0.1216	4.97022	40.8735
1-carboxyethylleucine	Amino Acid	Leucine, Isoleucine and Valine Metabolism	62559	LC/MS Neg	100020425	2663	202.108				0.1866	0.1866	0.1866	0.1866	0.1866	0.1866	0.1866	0.1866	0.1866	0.1866	0.1866	0.1866	0.5712	1.4127	9.2575	0.1866	0.5873	0.2342	23.4412	40.1615	0.1866	7.62254	40.8496
cadaverine	Amino Acid	Lysine Metabolism	15308	LC/MS Pos Early	100000110	3036	103.123	273	462-94-2;1476-39-7	C01672	0.4372	0.4372	0.4372	0.4372	0.4372	0.4372	0.4372	0.4372	0.4372	0.4372	0.4372	0.4372	0.4372	0.4372	0.4372	0.4372	1	3.9646	0.5366	167.199	0.4372	17.5324	40.1015
glycylleucine	Peptide	Dipeptide	34398	LC/MS Pos Early	100001258	3059	189.123	92843	869-19-2	C02155	0.0991	0.0991	0.0991	0.0991	0.0991	0.0991	0.0991	0.0991	0.0991	0.0991	0.0991	1.7492	0.2057	0.7825	1.4759	0.0991	0.1768	1	6.7018	27.0698	0.0991	3.93599	39.7174
thymidine	Nucleotide	Pyrimidine Metabolism, Thymine containing	2183	LC/MS Neg	872	1963.7	241.083	5789	50-89-5	C00214	0.1326	0.1326	0.1326	0.1326	0.1326	0.1326	0.1326	0.1326	0.1326	0.1326	0.1326	7.2991	0.6396	1	5.2026	0.1326	0.2742	0.9766	3.0017	33.7665	0.1326	5.24255	39.5366
X - 16267			47273	LC/MS Neg							0.0574	0.0574	0.0574	0.0574	0.0574	0.0574	0.0574	0.0574	0.0574	0.0574	0.0574	1.0616	0.0574	0.3266	1	0.0574	0.0574	0.4586	2.6271	16.4549	0.0574	2.21584	38.6035
lysine	Amino Acid	Lysine Metabolism	1301	LC/MS Pos Early	407	2850	147.113	5962	56-87-1	C00047,C00739	0.2829	0.3166	0.611	0.1968	1.389	0.5509	0.3614	0.4342	0.5539	0.2553	0.3278	9.8256	2.0142	7.0911	16.9916	1.5894	4.8368	7.2984	42.1106	91.8655	0.4952	18.3951	37.1468
tryptophan	Amino Acid	Tryptophan Metabolism	54	LC/MS Pos Early	565	2986	205.097	6305	73-22-3	C00078	0.4138	0.6202	0.6301	0.345	1.0688	0.693	0.5354	0.9312	0.8058	0.3972	0.4054	8.7773	2.3946	11.2588	28.8835	1.4322	6.1934	5.1038	52.0256	115.452	0.64405	23.1926	36.0106
ornithine	Amino Acid	Urea cycle; Arginine and Proline Metabolism	1493	LC/MS Pos Early	444	2800	133.097	6262	3184-13-2	C00077	0.5057	0.2815	0.4551	0.2761	1.2339	0.7661	0.3215	0.6403	0.4338	0.3992	0.3108	5.0038	1.8168	10.7662	24.1133	1.579	3.8767	4.2955	39.6855	93.6482	0.53132	18.5096	34.837
tyrosine	Amino Acid	Tyrosine Metabolism	1299	LC/MS Pos Early	815	2430	182.081	6057	60-18-4	C00082	0.1851	0.3808	0.7645	0.123	0.8799	1.2136	0.3329	0.3529	0.7097	0.0909	0.1366	6.647	1.9601	7.38	19.6318	1.1201	4.129	4.2575	38.3525	91.7108	0.50333	17.5325	34.8331
isoleucine	Amino Acid	Leucine, Isoleucine and Valine Metabolism	1125	LC/MS Pos Early	376	2800	132.102	6306	73-32-5	C16424,C00407,C06418	0.5108	0.5648	0.6581	0.3974	1.3164	0.5963	0.5416	0.6499	0.6836	0.4446	0.5162	10.9253	2.5635	10.1421	26.9787	1.6815	7.0111	6.9577	52.6819	93.3611	0.63635	21.2819	33.4437
cysteinylglycine	Amino Acid	Glutathione Metabolism	35637	LC/MS Pos Early	278	2132	179.048	439498	19246-18-5	C01419	0.0936	0.0936	0.0936	0.0936	0.0936	0.0936	0.0936	0.0936	0.0936	0.0936	0.0936	1	0.0936	0.3062	1.9827	0.0936	0.5519	0.0936	19.4839	4.9196	0.0936	2.86187	30.5755
2'-deoxyuridine	Nucleotide	Pyrimidine Metabolism, Uracil containing	52602	LC/MS Neg	536	1586	227.067	13712	951-78-0	C00526	0.2036	0.2036	0.2036	0.2036	0.2036	0.2036	0.2036	0.2036	0.2036	0.2036	0.2036	8.5243	0.5857	1	6.325	0.2123	0.2036	0.8918	3.1871	40.7854	0.2036	6.19188	30.412
X - 25109			61682	LC/MS Pos Early							0.0476	0.0476	0.0476	0.0476	0.0476	0.0476	0.0476	0.0476	0.0476	0.0476	0.0476	0.0476	0.3918	0.9178	4.4155	0.0476	1	0.0476	1.8426	5.5409	0.0476	1.4299	30.0399
1-carboxyethylphenylalanine	Amino Acid	Phenylalanine Metabolism	62566	LC/MS Neg	100020419	2844	236.093	59100900			0.2455	0.2455	0.2455	0.2455	0.2455	0.2455	0.2455	0.2455	0.2455	0.2455	0.2455	0.2455	0.6206	1.3794	8.4144	0.2455	0.601	0.254	18.8359	41.4335	0.2455	7.22753	29.44
oxindolylalanine	Amino Acid	Tryptophan Metabolism	64568	LC/MS Pos Early	100022120	2756	221.092	20977764			0.088	0.088	0.088	0.088	0.088	0.088	0.088	0.088	0.088	0.088	0.088	1.9164	0.0885	1.0468	2.7734	0.195	0.5844	0.9532	7.1965	11.0099	0.088	2.58521	29.3774
N-acetylmethionine	Amino Acid	Methionine, Cysteine, SAM and Taurine Metabolism	1589	LC/MS Neg	1083	1787	190.054	448580	65-82-7	C02712	0.2096	0.1743	0.2853	0.1743	0.8639	0.2671	0.2285	0.1743	0.4581	0.1743	0.1743	1.6704	1.1361	3.8604	9.7067	0.5062	1.7911	1.2326	16.5331	49.4672	0.30097	8.60781	28.6002
citrulline	Amino Acid	Urea cycle; Arginine and Proline Metabolism	2132	LC/MS Pos Early	391	1520	176.103	9750	372-75-8	C00327	0.3744	0.1655	0.4781	0.1972	1.5223	0.3923	0.2064	0.3353	0.3092	0.3311	0.2515	9.6147	1.6536	3.9812	8.0738	1.5219	5.5411	7.5719	23.75	59.1938	0.43118	12.1154	28.0981
histidine	Amino Acid	Histidine Metabolism	59	LC/MS Neg	355	755.9	154.062	6274	5934-29-2	C00135	0.156	0.208	1.0688	0.0982	1.1256	0.6511	0.3749	0.4122	0.6873	0.1659	0.3683	5.4539	1.494	4.757	12.5345	0.9312	2.6993	4.2917	33.9074	68.1166	0.4948	13.4554	27.1936
X - 22140			47386	LC/MS Neg							0.0864	0.0864	0.0864	0.0864	0.0864	0.0864	0.0864	0.0864	0.0864	0.0864	0.0864	1.3546	0.0864	0.3716	1	0.0864	0.0864	0.6743	3.2154	16.4866	0.0864	2.34481	27.139
N6-acetyllysine	Amino Acid	Lysine Metabolism	36752	LC/MS Neg	100001734	1059	187.109	92832	692-04-6	C02727	0.0932	0.0932	0.0932	0.0932	0.0932	0.0932	0.0932	0.0932	0.0932	0.0932	0.0932	0.8374	0.0932	0.5502	1.4326	0.0932	0.776	1.1626	6.9129	13.2767	0.0932	2.5228	27.0687
leucine	Amino Acid	Leucine, Isoleucine and Valine Metabolism	60	LC/MS Pos Early	397	2864	132.102	6106	61-90-5	C00123	0.3972	0.6283	0.7978	0.3361	1.1336	0.787	0.6317	0.4634	0.8664	0.3598	0.5134	7.355	2.1626	6.7479	20.3511	1.3654	5.1097	5.3227	46.494	75.9584	0.64013	17.138	26.7727
phenylalanine	Amino Acid	Phenylalanine Metabolism	64	LC/MS Pos Early	460	2878	166.086	6140	63-91-2	C00079	0.3565	0.5731	0.8044	0.2785	1.0479	0.9521	0.5237	0.4692	0.8922	0.3037	0.356	7.5145	2.2197	6.8334	20.6919	1.2531	4.7995	4.7507	40.8589	73.1066	0.62013	16.2384	26.1855
guanine	Nucleotide	Purine Metabolism, Guanine containing	32352	LC/MS Pos Early	172	2032	152.057	135398634	73-40-5	C00242	0.0875	0.1611	0.8286	0.0875	0.3161	0.0875	0.0875	0.0875	0.0875	0.0875	0.0875	5.5403	1.303	1.4113	3.16	0.6731	1	0.6625	2.3297	33.2414	0.19183	4.94088	25.7566
threonine	Amino Acid	Glycine, Serine and Threonine Metabolism	1284	LC/MS Pos Early	564	1514	120.066	6288	72-19-5	C00188	0.4738	0.5049	0.6335	0.3083	1.7765	0.6973	0.4734	0.4716	0.6504	0.4641	0.3897	7.0258	1.5015	4.212	8.6356	1.3027	2.406	5.8167	33.9455	98.5567	0.64538	16.3792	25.3792
N6-methyllysine	Amino Acid	Lysine Metabolism	62860	LC/MS Pos Early	100003415	2831	161.129	164795	1188-07-4	C02728	0.1747	0.1747	0.3021	0.1747	0.1747	0.882	0.1811	0.3953	0.319	0.4132	1.118	3.2415	0.1747	2.2396	6.5007	0.4696	1.4185	2.9576	16.8413	45.132	0.31915	8.00935	25.0959
X - 25955			63906	LC/MS Pos Early							0.0789	0.0789	0.0789	0.0789	0.1068	0.0789	0.0789	0.0789	0.0789	0.0789	0.0789	1.053	0.0789	0.9862	2.2464	0.23	0.0995	1.0138	3.0645	10.8226	0.08169	1.96738	24.0835
dimethylarginine (ADMA + SDMA)	Amino Acid	Urea cycle; Arginine and Proline Metabolism	36808	LC/MS Pos Early	100001810	2850	203.15	123831;169148	102783-24-4	C21189,C03626	0.1423	0.1423	0.1423	0.1423	0.2313	0.1423	0.1423	0.1423	0.1423	0.1423	0.1423	1.1992	0.1423	0.8937	2.4025	0.1423	0.6736	1	7.2666	21.8963	0.1512	3.57588	23.65
1-carboxyethylisoleucine	Amino Acid	Leucine, Isoleucine and Valine Metabolism	62558	LC/MS Neg	100020427	2628	202.108				0.2627	0.2627	0.2627	0.2627	0.2627	0.2627	0.2627	0.2627	0.2627	0.2627	0.2627	0.9604	0.3586	1.0396	6.8425	0.2627	0.5829	0.2627	13.5245	37.5232	0.2627	6.16198	23.4563
uracil	Nucleotide	Pyrimidine Metabolism, Uracil containing	605	LC/MS Neg	825	1086	111.02	1174	66-22-8	C00106	0.1339	0.1339	0.1339	0.1339	0.4077	0.1339	0.1339	0.1339	0.1339	0.1339	0.1339	1.1392	0.1339	0.8608	5.7999	0.1339	0.777	0.1339	3.6663	24.5576	0.16128	3.73364	23.15
X - 25936			63840	LC/MS Pos Early							0.1745	0.1745	0.1745	0.1745	0.2271	0.5349	0.1745	0.1745	0.515	0.1745	0.1745	0.7288	1.2712	3.4826	8.0266	0.1745	1.5036	0.6851	12.3146	29.2314	0.24985	5.75929	23.051
gamma-glutamylleucine	Peptide	Gamma-glutamyl Amino Acid	18369	LC/MS Pos Early	1268	2991	261.144	151023	2566-39-4		0.143	0.143	0.143	0.143	0.143	0.143	0.143	0.143	0.143	0.143	0.143	1.2478	0.1448	0.8423	1.4415	0.143	0.2764	1	5.8349	20.8788	0.143	3.19525	22.3444
X - 17009			47545	LC/MS Neg							0.1551	0.1551	0.1551	0.1551	0.1551	0.1551	0.1551	0.1551	0.1551	0.1551	0.1551	5.4302	0.3349	0.1551	3.6381	0.1551	0.1551	0.2539	1	21.8267	0.1551	3.31042	21.3438
cystine	Amino Acid	Methionine, Cysteine, SAM and Taurine Metabolism	56	LC/MS Polar	279	3424	239.017	67678	56-89-3	C00491	0.1876	0.1876	0.1876	0.1876	0.7717	0.1876	0.1876	0.1876	0.1876	0.1876	0.1876	1.7153	0.2023	1.2283	6.3639	0.1876	0.3951	0.7262	5.2966	33.7213	0.24601	5.00242	20.3342
1-carboxyethylvaline	Amino Acid	Leucine, Isoleucine and Valine Metabolism	62562	LC/MS Neg	100020423	2008	188.093				0.3593	0.3593	0.3593	0.3826	0.3593	0.3593	0.3593	0.3593	0.3593	0.3701	0.3593	0.6001	1	2.1412	9.8085	0.3593	1.1469	0.6248	20.6712	35.4651	0.36271	7.21764	19.8992
xanthine	Nucleotide	Purine Metabolism, (Hypo)Xanthine/Inosine containing	3147	LC/MS Neg	1004	910	151.026	1188	69-89-6	C00385	0.141	0.3179	0.4918	0.0802	10.4524	0.777	0.2175	0.0819	0.2652	0.199	0.0904	16.0271	3.568	10.2174	31.5239	1.223	6.5218	5.2293	53.5923	127.155	1.30239	25.5148	19.5908
serine	Amino Acid	Glycine, Serine and Threonine Metabolism	1648	LC/MS Pos Early	503	1239	106.05	5951	56-45-1	C00065	0.4632	0.3918	0.6089	0.2647	1.0269	0.9731	0.4506	0.3086	0.5339	0.562	0.237	5.1368	1.222	3.9784	6.7812	1.1179	1.9339	3.1691	24.2496	61.5456	0.55837	10.9371	19.5876
hypoxanthine	Nucleotide	Purine Metabolism, (Hypo)Xanthine/Inosine containing	3127	LC/MS Neg	171	1291.2	135.031	790;135398638	68-94-0	C00262	0.1274	0.3321	1	0.0854	2.5785	0.7898	0.4661	0.1077	0.2943	0.1258	0.0854	5.6067	2.5193	6.2103	18.7147	0.7924	6.0542	3.1201	25.1849	46.2522	0.59071	11.454	19.3903
X - 23665			49542	LC/MS Pos Early							0.0885	0.0885	0.0885	0.0885	0.0885	0.0885	0.0885	0.0885	0.0885	0.0885	0.0885	1.2028	0.0885	0.7791	1	0.1597	0.1331	1.3603	8.0442	4.1341	0.0885	1.69903	19.1981
1-stearoyl-2-oleoyl-GPE (18:0/18:1)	Lipid	Phosphatidylethanolamine (PE)	42448	LC/MS Pos Late	100001856	2950	746.569	9546742			0.1451	0.1451	0.1581	0.1451	0.1653	0.1673	0.1451	0.1451	0.1451	0.1451	0.1451	3.6779	0.3977	1.2864	3.3984	0.8217	0.1451	1.1783	6.0082	11.3764	0.15064	2.84352	18.8763
1-(1-enyl-palmitoyl)-2-oleoyl-GPE (P-16:0/18:1)*	Lipid	Plasmalogen	52477	LC/MS Pos Late	100009005	2750	702.543	52925128			0.1305	0.1305	0.2577	0.1305	0.4135	0.4008	0.1804	0.1305	0.1305	0.1305	0.1305	3.7342	0.4295	1.1602	3.8558	0.8398	1.7541	1.6978	5.9036	13.5534	0.20354	3.30589	16.242
1-carboxyethyltyrosine	Amino Acid	Tyrosine Metabolism	62564	LC/MS Neg	100020421	1846	252.088				0.0819	0.0819	0.0819	0.0819	0.0819	0.0819	0.0819	0.0819	0.0819	0.0819	0.0819	0.0819	0.0819	0.2988	1.7012	0.0819	0.0988	0.0819	2.7062	6.3985	0.0819	1.1613	14.1795
gamma-glutamylthreonine	Peptide	Gamma-glutamyl Amino Acid	33364	LC/MS Pos Early	100001314	1750	249.108	76078708	5652-48-2		0.0915	0.0915	0.0915	0.0915	0.0915	0.0915	0.0915	0.0915	0.0915	0.0915	0.0915	1	0.0915	0.1336	0.25	0.0915	0.0915	1.4898	1.4811	7.8008	0.0915	1.25213	13.6845
threonylphenylalanine	Peptide	Dipeptide	31530	LC/MS Neg	100001125	2322	265.119	7010580	16875-27-7		0.1319	0.1319	0.1319	0.1319	0.1319	0.1319	0.1319	0.1319	0.1319	0.1319	0.1319	1.0911	0.1319	0.5559	1.0726	0.1319	0.1551	0.9274	9.3837	4.0674	0.1319	1.76489	13.3805
asparagine	Amino Acid	Alanine and Aspartate Metabolism	512	LC/MS Pos Early	917	1225	133.061	6267	70-47-3	C00152	0.4542	0.5147	0.9115	0.2401	1.3259	0.8891	0.5486	0.3177	0.8243	0.4081	0.3632	6.2333	1.5551	4.2284	9.6593	1.0885	2.9823	3.8136	9.1857	45.7745	0.64342	8.48839	13.1926
xanthosine	Nucleotide	Purine Metabolism, (Hypo)Xanthine/Inosine containing	15136	LC/MS Neg	100000299	1075	283.068	64959	146-80-5	C01762	0.1386	0.1386	0.1386	0.1386	0.1386	0.1386	0.1386	0.1386	0.1386	0.1386	0.1386	1.3374	0.1386	0.3578	1	0.1386	0.1386	0.6368	4.9051	9.2158	0.1386	1.80073	12.9923
3-ureidopropionate	Nucleotide	Pyrimidine Metabolism, Uracil containing	3155	LC/MS Pos Early	1053	875	133.061	111	462-88-4	C02642	0.5121	0.5121	0.5121	0.5121	0.5121	0.7164	0.5121	0.5121	0.5121	0.5121	0.5121	0.5121	0.5121	0.5121	0.6961	1.0439	0.9561	1.2768	21.0147	41.7261	0.53253	6.87621	12.9123
arginine	Amino Acid	Urea cycle; Arginine and Proline Metabolism	1638	LC/MS Pos Early	231	2825	175.119	6322	1119-34-2	C00062	0.3731	0.5655	0.9681	0.2637	1.4167	0.9762	0.5566	0.4212	0.7633	0.3459	0.3989	6.4637	1.351	4.4555	7.625	1.0238	2.6803	4.7935	15.796	38.9367	0.66503	8.35244	12.5595
X - 14056			46632	LC/MS Pos Early							0.3083	0.9137	4.9161	0.2732	1.0863	0.4225	1.2298	0.2264	3.1828	0.2914	0.8254	0.7257	4.4184	21.6857	18.6123	0.1597	10.9311	0.3954	37.7051	63.946	1.28505	15.9405	12.4046
fructosyllysine	Amino Acid	Lysine Metabolism	46227	LC/MS Pos Early	100005373	2784	309.166	9839580	21291-40-7		0.2636	0.2636	0.2636	0.2636	0.282	0.2636	0.2636	0.4506	0.5539	0.2636	0.2736	1	3.4435	3.4844	3.3519	0.2636	1.6983	0.5839	5.0783	19.56	0.31317	3.87375	12.3695
X - 25786			63556	LC/MS Neg							0.1987	0.1987	0.1987	0.1987	0.2434	0.1987	0.1987	0.1987	0.1987	0.1987	0.1987	1.4658	0.1987	0.3883	1.3524	0.1987	0.2304	1	4.3217	15.7581	0.20317	2.51128	12.3605
dihomolinoleate (20:2n6)	Lipid	Long Chain Polyunsaturated Fatty Acid (n3 and n6)	17805	LC/MS Neg	1231	5730	307.264	6439848	2091-39-6	C16525	0.1982	0.1982	0.1982	0.1982	0.1982	0.1982	0.2967	0.1982	0.1982	0.1982	0.1982	1.4948	1	0.7973	4.0793	0.3818	1.7508	0.2537	1.9369	13.0666	0.20805	2.49594	11.9968
alanine	Amino Acid	Alanine and Aspartate Metabolism	1126	LC/MS Pos Early	811	1700	90.055	5950	56-41-7	C00041	0.4539	0.6902	0.9532	0.2409	1.0468	1.0542	0.5621	0.5798	0.848	0.4674	0.5688	3.9998	1.4207	4.4575	9.799	0.7503	3.7336	2.8054	16.1647	38.1018	0.68965	8.18016	11.8613
N-acetylalanine	Amino Acid	Alanine and Aspartate Metabolism	1585	LC/MS Polar	1110	1564.8	130.051	88064	97-69-8	C02847	0.2568	0.2568	0.3335	0.2568	1.0027	0.4215	0.2568	0.2568	0.5165	0.2568	0.2568	0.9973	0.7234	1.8391	4.7382	0.3061	1.2684	1.1579	11.9743	21.1127	0.3815	4.43742	11.6315
X - 17825			47293	LC/MS Neg							0.1654	0.1654	0.1654	0.1654	0.1654	0.1654	0.1654	0.1654	0.1654	0.1654	0.1654	0.9925	0.1654	0.1654	1.0075	0.1654	0.1654	0.3363	2.5468	12.9517	0.1654	1.86618	11.2828
X - 12100			47687	LC/MS Pos Early							0.1498	0.1498	0.1498	0.1498	0.5241	0.1498	0.1498	0.1498	0.1498	0.1498	0.1498	0.9818	0.2226	1.0489	1.4202	0.1498	0.8426	1.0182	5.564	9.3975	0.18723	2.07954	11.1069
X - 26097			64372	LC/MS Pos Early							0.1316	0.1316	0.1316	0.1316	0.1316	0.1316	0.1316	0.1316	0.1316	0.1316	0.1316	1	0.1316	0.1316	1.0115	0.1316	0.1491	0.4581	4.107	6.4714	0.1316	1.37235	10.4282
proline	Amino Acid	Urea cycle; Arginine and Proline Metabolism	1898	LC/MS Pos Early	480	1603	116.071	145742;614;8988	147-85-3	C00148,C000763	0.5376	0.6188	0.8852	0.3283	1.2921	0.8994	0.549	0.7578	1.1006	0.3676	0.5943	3.0623	1.6526	3.4354	7.0438	0.7204	3.0943	3.635	13.4392	39.3766	0.73364	7.60539	10.3667
X - 24425			52655	LC/MS Pos Early							0.0784	0.0784	0.0784	0.0784	0.0784	0.0784	0.0784	0.0784	0.0784	0.0784	0.0784	1.3101	0.0784	0.114	0.0784	0.0784	0.0784	2.247	0.6899	3.3392	0.0784	0.80922	10.3217
gulonate*	Cofactors and Vitamins	Ascorbate and Aldarate Metabolism	46957	LC/MS Polar	100001586	2750	195.051	152304	20246-53-1	C00800	0.3461	0.3665	0.3461	0.3461	1.0063	0.3461	0.3461	0.3461	0.3461	0.3461	0.3461	0.9937	0.62	0.3461	5.7058	0.3461	0.3461	0.3461	6.2489	26.8213	0.41416	4.21202	10.17
histidine betaine (hercynine)*	Xenobiotics	Food Component/Plant	62278	LC/MS Pos Early	100004059	2094	198.124	3083620	534-30-5		0.1153	0.0876	0.0876	0.0876	1.0442	0.3942	0.0876	0.0876	0.0876	0.0876	0.0876	2.4866	0.0876	0.0917	0.5932	0.0876	1.8133	1	1.0133	14.1264	0.21669	2.13873	9.87
X - 25770			63539	LC/MS Neg							0.1779	0.1779	0.1779	0.1779	0.1779	0.1779	0.1779	0.1779	0.1779	0.1779	0.1779	0.8217	0.1779	0.1779	1.1783	0.1779	0.1779	0.3225	2.8054	11.1712	0.1779	1.71886	9.66194
N-palmitoyl-sphingosine (d18:1/16:0)	Lipid	Ceramides	44877	LC/MS Pos Late	1518	2893	538.519	5283564	24696-26-2		0.3699	0.2639	0.7242	0.0748	2.3816	1.7223	0.6848	0.0748	0.3791	0.1083	0.0815	7.3	0.7522	1	8.5246	2.1824	7.596	3.1518	9.5195	25.2423	0.67837	6.53503	9.63343
phenylalanylalanine	Peptide	Dipeptide	41374	LC/MS Pos Early	100003589	2909	237.123	5488196	3918-87-4		0.1568	0.1568	0.1568	0.1568	0.1568	0.1568	0.1568	0.1568	0.1568	0.1568	0.1568	1.7646	0.1568	0.3679	0.9146	0.1568	0.2673	1.0854	3.9007	6.1415	0.1568	1.49124	9.51046
N-acetylmethionine sulfoxide	Amino Acid	Methionine, Cysteine, SAM and Taurine Metabolism	45428	LC/MS Pos Early	100005463	880	208.064	11902949	108646-71-5		0.1889	0.1889	0.1889	0.1889	0.9359	0.1889	0.1889	0.1889	0.1889	0.1889	0.1889	1.0641	0.1998	0.5112	1.4407	0.1889	0.7384	1.2073	5.3471	13.9856	0.2636	2.4872	9.43551
1-(1-enyl-stearoyl)-2-oleoyl-GPE (P-18:0/18:1)	Lipid	Plasmalogen	52614	LC/MS Pos Late	100008919	3100	730.574	42607457	144371-68-6		0.2093	0.2093	0.2093	0.2093	0.241	0.2093	0.2093	0.2093	0.2093	0.2093	0.2093	2.0514	0.2093	0.6782	3.0462	0.4997	0.8547	1.1453	3.5082	7.5172	0.21247	1.97195	9.28107
N-acetylserine	Amino Acid	Glycine, Serine and Threonine Metabolism	37076	LC/MS Polar	100001851	2000	146.046	65249	97-14-3		0.4893	0.4356	0.808	0.573	2.2221	0.6118	0.6161	0.3734	0.9401	0.559	0.4435	2.8081	1.2205	3.7143	7.625	1.0599	2.4868	2.0058	16.9073	30.6787	0.76284	6.89499	9.03858
lactosyl-N-palmitoyl-sphingosine (d18:1/16:0)	Lipid	Lactosylceramides (LCER)	53010	LC/MS Pos Late	100009030	2527	862.625	53477895	4201-62-1		0.2464	0.2464	0.2464	0.2464	0.2464	0.2464	0.2464	0.2464	0.2464	0.2464	0.2464	2.6052	0.3259	0.8445	2.5908	0.8545	0.6088	1.1455	4.2573	8.7683	0.2464	2.22472	9.0289
cytosine	Nucleotide	Pyrimidine Metabolism, Cytidine containing	573	LC/MS Pos Early	881	2060	112.05	597	71-30-7	C00380	0.239	0.239	0.239	0.239	0.239	0.239	0.239	0.4224	0.239	0.239	0.239	0.7447	1.8398	0.239	0.239	0.239	0.5231	10.6341	1.2553	7.189	0.25734	2.3142	8.99277
glutamate	Amino Acid	Glutamate Metabolism	57	LC/MS Pos Early	561	1500	148.06	33032	56-86-0	C00025,C00217	0.4663	0.5291	1.3804	0.3176	1.5068	0.7465	0.8815	0.3979	0.7285	0.56	0.5533	3.3491	1.1185	2.6605	7.6283	0.6967	2.4585	2.1364	14.9353	31.9522	0.75146	6.74888	8.98102
2-methylcitrate/homocitrate	Energy	TCA Cycle	52282	LC/MS Neg	100008929	575	205.035	515;439459		C01251	0.2937	0.2937	0.2952	0.2937	0.3857	0.2937	0.2937	0.2937	0.2937	0.2937	0.2937	1.2793	0.2937	0.3438	1.6133	0.2937	0.8852	1.1148	7.6682	12.396	0.30305	2.61817	8.6394
4-imidazoleacetate	Amino Acid	Histidine Metabolism	32349	LC/MS Pos Early	100001207	2055	127.05	96215	645-65-8	C02835	0.1834	0.1834	0.1834	0.1834	0.1834	0.1834	0.1834	0.1834	0.1834	0.1834	0.1834	1.0533	0.1834	0.3577	0.4227	0.1834	0.9846	1.0154	5.2693	5.9658	0.1834	1.5619	8.51636
3-(4-hydroxyphenyl)lactate (HPLA)	Amino Acid	Tyrosine Metabolism	32197	LC/MS Neg	240	1379	181.051	9378	6482-98-0	C03672	0.4167	0.4688	0.6334	0.524	2.5134	1.0618	0.459	0.5097	2.0035	0.4009	0.4031	0.9382	2.7527	1.836	3.1475	0.366	1.5639	1.9754	12.965	50.0845	0.89912	7.60323	8.4563
putrescine	Amino Acid	Polyamine Metabolism	1408	LC/MS Pos Early	49	3027	89.1073	1045	110-60-1	C00134	0.125	0.125	0.125	0.125	0.1878	1.0888	0.4925	0.125	0.1647	0.125	0.125	1.7049	0.3716	0.125	0.9112	0.125	1.5928	1.3359	11.9452	3.8825	0.26838	2.21191	8.24171
glycosyl-N-palmitoyl-sphingosine (d18:1/16:0)	Lipid	Hexosylceramides (HCER)	53013	LC/MS Pos Late	100009272	2623	700.572				0.2317	0.2317	0.2317	0.2317	0.6697	0.3429	0.2396	0.2317	0.2317	0.2317	0.2317	2.0284	0.2317	0.2417	2.2518	0.8638	2.0543	1.1362	4.109	9.7878	0.28741	2.29364	7.98038
N-acetyltaurine	Amino Acid	Methionine, Cysteine, SAM and Taurine Metabolism	48187	LC/MS Neg	100005466	800	166.018	159864			0.2354	0.2354	0.7866	0.2354	0.5246	0.2354	0.3058	0.2354	0.4841	0.2354	0.5378	0.4873	1.2326	1.547	3.1724	0.2354	1.2134	2.1946	6.7221	10.4176	0.35135	2.77602	7.90101
alanylleucine	Peptide	Dipeptide	37093	LC/MS Pos Early	100001890	3055	203.139	259583	1638-60-4		0.1871	0.1871	0.1871	0.1871	0.1871	0.1871	0.1871	0.1871	0.1871	0.1871	0.1871	1.0974	0.1871	1.0715	0.9285	0.1871	0.2676	0.9087	6.0167	3.7137	0.1871	1.45654	7.78482
cysteine	Amino Acid	Methionine, Cysteine, SAM and Taurine Metabolism	1868	LC/MS Pos Early	800	1475	122.027	5862	52-90-4;56-89-3	C00097	0.2947	0.7335	1	0.4004	2.1358	0.5407	1.2046	0.1731	1.4441	0.6783	0.2207	1.4412	0.6145	3.2705	13.6205	0.1731	3.0357	0.6806	32.6426	11.2044	0.86052	6.69038	7.77481
gamma-glutamylglutamate	Peptide	Gamma-glutamyl Amino Acid	36738	LC/MS Pos Early	331	1775	277.103	92865	1116-22-9	C05282	0.3277	0.3277	0.3277	0.3277	0.3277	0.3277	0.3277	0.3277	0.3277	0.3277	0.3277	1	0.3277	0.8676	1.7934	0.3277	0.3277	0.7054	4.3787	15.3557	0.3277	2.54116	7.75453
1-stearoyl-2-oleoyl-GPS (18:0/18:1)	Lipid	Phosphatidylserine (PS)	19265	LC/MS Pos Late	100000639	3000	790.559	9547087			0.3851	0.1581	0.6663	0.2357	1.3522	1	0.628	0.1581	0.4991	0.4379	0.5932	5.4004	0.8242	1.4125	5.4941	1.744	3.1805	2.4443	7.7241	13.9663	0.55205	4.27836	7.74995
N-stearoyl-sphingosine (d18:1/18:0)*	Lipid	Ceramides	54979	LC/MS Pos Late	1547	3392	566.551	5283565	104404-17-3		0.1414	0.1139	0.1139	0.1139	1.128	0.6292	0.1572	0.1139	0.1139	0.1139	0.1139	2.1696	0.1139	0.1139	2.9484	0.841	2.894	0.872	2.7871	8.2674	0.27392	2.11212	7.71072
1-methylnicotinamide	Cofactors and Vitamins	Nicotinate and Nicotinamide Metabolism	27665	LC/MS Pos Early	55	1940	137.071	457	1005-24-9	C02918	0.3498	0.3498	0.539	0.4091	0.3498	0.3498	0.3498	0.3498	0.3498	0.3498	0.3498	1.1151	1	2.2799	2.0716	0.4124	0.5754	0.3498	2.0145	18.5239	0.37465	2.86924	7.65845
erucate (22:1n9)	Lipid	Long Chain Monounsaturated Fatty Acid	1552	LC/MS Neg	1087	6355.6	337.311	8216;5281116	112-86-7	C08316	0.9009	0.3665	0.6236	0.3665	0.3665	0.3665	0.3665	0.6861	0.3665	0.3665	0.3665	1.5488	0.7421	1	3.2896	0.3665	1.5636	0.3665	1.8362	24.3061	0.47761	3.53859	7.40895
N-acetylisoleucine	Amino Acid	Leucine, Isoleucine and Valine Metabolism	33967	LC/MS Neg	100001276	2325	172.098	306109	3077-46-1		0.1791	0.1791	0.1791	0.1791	0.1791	0.1791	0.1791	0.1791	0.1791	0.1791	0.1791	0.1791	0.1791	0.1791	0.1791	0.1791	0.1791	0.1791	1	10.7115	0.1791	1.31443	7.33908
5,6-dihydrouridine	Nucleotide	Pyrimidine Metabolism, Uracil containing	61833	LC/MS Neg	100001425	1119	245.078	94312	2027-05-04		0.4018	0.4018	0.7444	0.4018	0.6727	0.4018	0.4018	0.4018	0.6997	0.4018	0.4018	2.4453	0.7971	1.4701	1.5988	0.4018	0.8055	1.1945	6.9272	20.029	0.49294	3.60711	7.31754
X - 12462			46620	LC/MS Pos Early							0.1921	0.1921	0.1921	0.1921	0.9237	0.1921	0.1921	0.1921	0.1921	0.3418	0.1921	1.9093	0.285	1.0763	7.1862	0.1921	0.1921	0.5643	6.7932	1.5027	0.28023	1.98933	7.09892
N-acetylputrescine	Amino Acid	Polyamine Metabolism	37496	LC/MS Pos Early	192	2230	131.118	122356	18233-70-0	C02714	0.1983	0.1983	0.1983	0.1983	0.1983	0.6649	0.1983	0.1983	0.1983	0.1983	0.1983	2.1086	0.242	0.1983	0.6752	0.1983	1	1.3108	1.73	9.4977	0.24496	1.71592	7.0049
N-acetylvaline	Amino Acid	Leucine, Isoleucine and Valine Metabolism	1591	LC/MS Neg	1084	1704	158.082	66789	96-81-1		0.1878	0.1878	0.1878	0.1878	0.1878	0.1878	0.1878	0.1878	0.1878	0.1878	0.1878	0.1878	0.1878	0.1878	0.3943	0.1878	0.1878	0.1878	1.6057	9.6316	0.1878	1.29462	6.89361
cysteine-glutathione disulfide	Amino Acid	Glutathione Metabolism	35159	LC/MS Pos Early	100001437	2465	427.095	3080690	13081-14-6	R00900	0.0929	0.0929	0.693	0.0929	2.0239	0.2916	0.0929	0.1929	0.9539	0.0929	0.0929	2.3514	0.7741	2.5342	5.7895	0.4684	2.1137	1	8.449	8.0808	0.46198	3.1654	6.85181
4-methyl-2-oxopentanoate	Amino Acid	Leucine, Isoleucine and Valine Metabolism	22116	LC/MS Neg	100000551	2170	129.056	70	816-66-0	C00233	0.4451	0.4451	0.6081	0.4451	0.7849	0.4451	0.4451	0.8578	1.0314	0.4451	0.55	1.0234	0.9526	1.6052	4.3829	0.4451	1.5969	0.9766	10.8344	18.2068	0.59528	4.05739	6.81594
gamma-glutamylglutamine	Peptide	Gamma-glutamyl Amino Acid	2730	LC/MS Pos Early	1140	1430	276.119	150914	10148-81-9	C05283	0.1924	0.1924	0.6927	0.1924	0.5148	0.6044	0.1924	0.1924	0.1924	0.1924	0.1924	1.2468	0.9141	1.0859	1.6842	0.1924	1.1941	0.5696	2.4084	11.4757	0.31587	2.09636	6.63678
3-methyl-2-oxovalerate	Amino Acid	Leucine, Isoleucine and Valine Metabolism	15676	LC/MS Neg	100000036	2064.2	129.056	440877;439286	1460-34-0;51829-07-3	C00671,C06008,C03465	0.4247	0.4247	0.7743	0.4247	0.9766	0.4247	0.4247	0.9336	0.4247	0.4247	0.7917	1	4.0796	1.5586	1.0848	0.4247	1.5831	0.8652	11.5046	14.4929	0.56574	3.73852	6.60819
lactate	Carbohydrate	Glycolysis, Gluconeogenesis, and Pyruvate Metabolism	527	LC/MS Polar	482	1469	89.0244	612	79-33-4	C00186	0.4408	0.4812	0.9435	0.4232	1.1469	0.458	0.4134	0.5834	1.0565	0.3018	0.3436	1.1839	1.5907	2.4286	5.7497	0.5361	1.9367	1.3881	12.0556	14.0564	0.62487	4.12694	6.60448
2-hydroxyglutarate	Lipid	Fatty Acid, Dicarboxylate	37253	LC/MS Polar	100002070	3352.8	147.03	43	40951-21-1	C02630	0.2805	0.6143	0.9532	0.2395	2.1319	1.8355	0.6691	0.2213	1.0468	0.3657	0.3858	2.4535	1.2853	2.5619	5.4963	0.8897	1.5161	0.9433	13.5486	25.6207	0.83578	5.47012	6.54493
dCMP	Nucleotide	Pyrimidine Metabolism, Cytidine containing	533	LC/MS Pos Early	298	975	308.064	13945	1032-65-1	C00239	0.3317	0.3317	0.3317	0.3317	0.3317	0.3317	0.3317	0.3317	0.3317	0.3317	0.3317	1.4079	0.3317	0.3317	1	0.3317	0.3317	0.4086	0.3317	16.8003	0.3317	2.1607	6.51402
cholesterol	Lipid	Sterol	63	LC/MS Pos Late	266	2707	369.352	6432564;11025495;5997	57-88-5	C00187	0.1807	0.1807	0.3837	0.1807	2.3207	0.7159	0.6866	0.1807	0.2922	0.3239	0.1807	4.8797	0.2285	1.2382	5.8324	1.2051	3.2438	0.7949	6.3131	11.4566	0.54458	3.5373	6.49546
thioproline	Xenobiotics	Chemical	53231	LC/MS Pos Early	100009232	1250	134.027	93176	34592-47-4		0.517	0.5867	0.9987	0.344	1.2382	0.1042	1.0471	0.0749	1.6279	0.3346	0.4336	1.6615	1.0013	3.3609	11.2101	0.2932	3.3346	0.4656	10.8739	10.4285	0.68733	4.30632	6.26529
glycylisoleucine	Peptide	Dipeptide	36659	LC/MS Pos Early	100001790	3002	189.123	259613	19461-38-2		0.3613	0.3613	0.3613	0.3613	0.3613	0.3613	0.3613	0.3613	0.3613	0.3613	0.3613	1.2038	0.3613	0.3613	0.7962	0.3613	0.3613	0.685	3.3142	13.9906	0.3613	2.17963	6.03274
X - 25477			62901	LC/MS Neg							0.305	0.305	0.305	0.305	0.305	0.305	0.305	0.305	0.305	0.305	0.305	0.8228	0.305	0.305	1.1772	0.305	0.305	0.8197	3.2771	10.5556	0.305	1.81774	5.9598
sphingomyelin (d18:1/24:1, d18:2/24:0)*	Lipid	Sphingomyelins	47153	LC/MS Pos Late	100005986	3200	813.684	44260126	94359-13-4		0.1613	0.2515	0.4268	0.1613	1.2305	0.4565	0.4553	1	0.5353	0.1613	0.1613	3.6527	0.3969	1.0279	3.4877	0.9492	1.403	1.7457	6.1953	9.6935	0.48398	2.87132	5.93272
inosine 5'-monophosphate (IMP)	Nucleotide	Purine Metabolism, (Hypo)Xanthine/Inosine containing	2133	LC/MS Pos Early	362	650	349.054	8582	4691-65-0	C00130	0.2029	0.2029	0.2029	0.2029	0.2029	0.2029	0.2029	0.2029	0.2029	0.2029	0.2029	1.0089	0.693	0.9762	1.7128	0.2029	1	0.5304	2.4003	3.2822	0.2029	1.20096	5.91897
orotate	Nucleotide	Pyrimidine Metabolism, Orotate containing	1505	LC/MS Polar	445	1638.1	155.01	967	50887-69-9	C00295	0.0896	0.0896	0.0896	0.0896	1.3074	0.0896	0.0896	0.0896	0.0896	0.0896	0.0896	1.4743	0.0896	0.6926	2.0325	0.484	0.5097	0.1849	3.4153	3.4734	0.21138	1.24459	5.88793
adenine	Nucleotide	Purine Metabolism, Adenine containing	554	LC/MS Pos Early	880	2221	136.062	190	73-24-5	C00147	0.9795	0.5638	1.2554	0.2013	0.5002	1.3615	0.2013	0.8365	0.7406	0.2013	0.8726	4.0668	1.1476	1.0946	3.5144	0.466	4.1498	0.8181	1.0205	22.6715	0.68414	3.98219	5.82072
beta-alanine	Nucleotide	Pyrimidine Metabolism, Uracil containing	55	LC/MS Pos Early	244	1905	90.055	239	56-41-7;107-95-9	C00099	1.1681	0.1906	0.1906	0.1906	0.1906	0.4611	0.1906	0.1906	0.3149	1.2797	1.104	0.7114	0.5123	0.896	3.3046	0.1906	4.5336	0.2272	2.2001	11.0522	0.43674	2.4732	5.66287
trimethylamine N-oxide	Lipid	Phospholipid Metabolism	40406	LC/MS Pos Early	100003397	2100	76.0757	1145	1184-78-7	C01104	0.426	0.2995	1.0823	0.7663	1.5402	0.7065	0.311	0.9558	1.0442	0.2817	2.6768	10.4245	8.0912	0.7402	1.8385	0.7636	6.1301	3.0458	7.4765	0.4577	0.74135	4.16449	5.61744
tyrosylglycine	Peptide	Dipeptide	41375	LC/MS Neg	100003598	1635	237.088	7021854	673-05-5		0.32	0.32	0.32	0.32	0.32	0.32	0.32	0.32	0.32	0.32	0.32	1.2971	0.32	0.5753	1	0.32	0.32	0.7271	3.6085	9.1992	0.32	1.76872	5.52725
N-acetylglutamate	Amino Acid	Glutamate Metabolism	15720	LC/MS Polar	100000282	3106	188.056	70914	2017-08-03	C00624	0.4054	0.4054	0.4054	0.4054	0.5143	0.4054	0.4054	0.4054	0.4054	0.4054	0.4054	1.367	0.4054	0.4054	1.0144	0.4054	0.596	0.9856	10.9361	6.3957	0.41629	2.29164	5.50491
pseudouridine	Nucleotide	Pyrimidine Metabolism, Uracil containing	33442	LC/MS Neg	821	1100	243.062	15047	1445-07-4	C02067	0.4036	0.4542	1.3935	0.4696	0.7821	1.0608	0.3703	0.5753	0.9392	0.3672	0.4228	2.6402	1.1883	1.271	1.7423	0.2909	1.3878	1.7842	8.4168	17.7738	0.68158	3.69181	5.41655
N-acetylglucosamine/N-acetylgalactosamine	Carbohydrate	Aminosugar Metabolism	46539	LC/MS Pos Early	100006435	715	222.097	84265;439174		C01074	0.0553	0.7869	0.1687	0.0553	4.8997	0.3521	0.3693	0.0553	0.362	0.0553	0.0553	2.076	0.6933	1.2131	3.793	0.5602	1.6237	1.4839	4.8202	21.925	0.71599	3.82437	5.34137
X - 18167			47339	LC/MS Neg							0.4274	0.4274	0.4274	0.4274	0.4274	0.4274	0.4274	0.4274	0.4274	0.4274	0.4274	0.9288	0.4274	0.4274	1.0712	0.4274	0.4274	0.7447	2.6758	14.5121	0.4274	2.20696	5.16369
5-oxoproline	Amino Acid	Glutathione Metabolism	1494	LC/MS Pos Early	1021	1000	130.05	439685;7405	98-79-3	C01879,C02237	0.864	0.2986	0.8419	0.4472	0.998	2.2395	0.3823	0.6365	0.7505	1.002	0.317	1.5295	1.37	3.1728	6.7214	0.9313	1.5079	1.1118	7.5515	19.436	0.84605	4.36492	5.15917
N-delta-acetylornithine	Amino Acid	Urea cycle; Arginine and Proline Metabolism	43249	LC/MS Neg	100004523	858	173.093	9920500		C00437	0.3671	0.3671	0.3671	0.3671	0.3671	0.3671	0.3671	0.3671	0.3671	0.3671	0.3671	0.3832	0.4962	0.5349	4.5016	0.3671	1.1242	1	8.1708	1.7773	0.3671	1.87224	5.10008
kynurenine	Amino Acid	Tryptophan Metabolism	15140	LC/MS Pos Early	100000265	2739	209.092	161166	2922-83-0	C00328	0.8167	0.7271	0.984	0.74	1.7445	0.831	0.7698	0.9874	1.0062	0.7254	0.9585	3.8395	1.2617	1.4826	4.2743	0.9938	2.0828	2.573	10.0662	19.6158	0.93321	4.71482	5.05226
X - 22771			48076	LC/MS Neg							0.2801	0.2801	0.2801	0.2801	0.2801	0.2801	0.2801	0.2801	0.2801	0.2801	0.2801	0.5135	0.2801	1	3.996	0.2801	0.5757	0.2801	3.6831	3.2154	0.2801	1.41041	5.03538
palmitoyl sphingomyelin (d18:1/16:0)	Lipid	Sphingomyelins	37506	LC/MS Pos Late	100002107	2168	703.575	9939941	6254-89-3		0.4067	0.5903	0.5744	0.3327	1.2397	0.5123	0.8996	1.0859	0.5566	0.3534	0.4371	4.4517	0.9141	1.354	4.5392	1.4166	1.8519	2.0164	7.0047	8.9233	0.65516	3.2909	5.02305
N-palmitoyl-sphinganine (d18:0/16:0)	Lipid	Dihydroceramides	52604	LC/MS Pos Late	100009028	3090	540.535	5283572	5966-29-0		0.1399	0.1399	0.1399	0.1399	0.1399	0.1399	0.1399	0.1399	0.1399	0.1399	0.1399	1	0.1399	0.1399	1.0531	0.1399	0.5695	0.399	1.1095	2.3194	0.1399	0.70101	5.01079
2-piperidinone	Xenobiotics	Food Component/Plant	43400	LC/MS Pos Early	100004295	1675	100.076	12665	675-20-7		0.6864	0.2828	0.6191	0.6017	1.1377	0.6468	0.5444	0.5952	0.9179	0.6747	3.687	4.9742	6.2491	1.0821	1.7646	1.3237	4.166	6.826	2.5654	0.8461	0.67067	3.34842	4.99265
aspartate	Amino Acid	Alanine and Aspartate Metabolism	443	LC/MS Pos Early	234	1165	134.045	5960	56-84-8	C00049	0.8485	0.7647	1.5689	0.3663	1.2967	0.7954	1.1515	0.4739	0.8165	0.7008	0.4332	1.9683	0.7151	1.6128	4.3736	0.5026	1.5284	1.2721	9.1118	22.2876	0.87832	4.38055	4.98742
1-stearoyl-2-oleoyl-GPC (18:0/18:1)	Lipid	Phosphatidylcholine (PC)	52438	LC/MS Pos Late	100008904	2644	788.616	24778825	56421-10-4		1.0553	0.1593	0.4216	0.2779	1.1549	0.6121	0.6205	0.6485	0.768	0.6154	0.9447	4.6758	0.6245	1.264	4.4783	1.1647	1.7034	1.6737	4.4503	10.1278	0.63335	3.11072	4.91153
2-oxoarginine*	Amino Acid	Urea cycle; Arginine and Proline Metabolism	55072	LC/MS Pos Early	100002784	1760	174.087	558	2015-10-04	C03771	0.327	0.2011	0.317	0.2011	2.0693	0.2011	0.2011	0.9529	0.5254	0.2011	0.2011	2.1818	0.2322	1.0069	1.3891	0.2011	0.9931	1.1415	1.778	15.8703	0.51971	2.49951	4.80943
nicotinamide ribonucleotide (NMN)	Cofactors and Vitamins	Nicotinate and Nicotinamide Metabolism	22152	LC/MS Pos Early	1312	766	335.064	14180	1094-61-7	C00455	0.4707	1.0525	1.2942	0.4707	0.6161	0.4707	0.4707	0.4707	0.4707	0.4707	0.4707	0.5932	0.4707	1.4458	1	0.5092	0.7897	0.4707	3.7115	19.9998	0.62577	2.94613	4.70801
1-(1-enyl-palmitoyl)-2-arachidonoyl-GPE (P-16:0/20:4)*	Lipid	Plasmalogen	52673	LC/MS Pos Late	100009002	2300	724.528	52925126			0.3732	0.6473	0.9308	0.2034	1.0246	0.9754	1.1905	0.203	0.8029	0.4041	0.3667	4.156	0.4612	1.3644	3.7571	1.3825	2.5011	1.6344	5.9581	9.9206	0.67552	3.15021	4.66339
indolelactate	Amino Acid	Tryptophan Metabolism	18349	LC/MS Neg	100000463	2286	204.067	92904	832-97-3	C02043	0.573	0.4113	0.3814	0.3814	0.6798	0.3814	0.3814	0.5848	1.3369	0.3814	0.3814	0.3814	1	1.0989	1.964	0.3814	0.8498	1.0001	8.187	10.1505	0.54928	2.53945	4.62323
1-palmitoyl-2-oleoyl-GPE (16:0/18:1)	Lipid	Phosphatidylethanolamine (PE)	19263	LC/MS Pos Late	1526	2600	718.538	5283496	26662-94-2		0.5296	0.4059	0.6076	0.4059	0.9384	0.9494	0.7778	0.4059	0.8121	0.4059	1.0506	4.5477	0.4059	1.0853	3.9721	0.7837	2.7207	2.643	3.8047	7.1749	0.62385	2.81886	4.51849
X - 25769			63538	LC/MS Neg							0.4145	0.4145	0.4145	0.4145	0.4145	0.4145	0.4145	0.4145	0.4145	0.4145	0.4145	1.1126	0.4145	0.4145	0.8874	0.4145	0.4145	0.4827	3.5316	10.6082	0.4145	1.8695	4.51025
nicotinate	Cofactors and Vitamins	Nicotinate and Nicotinamide Metabolism	1504	LC/MS Pos Early	567	1673	124.039	938	59-67-6	C00253	0.4468	0.4468	0.4468	0.4468	0.4468	0.4468	0.4468	0.4468	0.4468	0.4468	0.4468	0.4468	0.4468	0.4468	1.2697	0.4468	0.7303	0.5013	12.921	2.2954	0.4468	1.99517	4.46547
glutamine	Amino Acid	Glutamate Metabolism	53	LC/MS Pos Early	563	1291	147.076	5961	56-85-9	C00064	0.4817	0.503	1.0498	0.2705	1.1373	1.4846	0.6808	0.3812	0.7655	0.5767	0.4776	2.0705	1.3103	1.7438	3.6926	0.3734	1.7378	0.9502	3.2968	16.98	0.73311	3.2633	4.45131
C-glycosyltryptophan	Amino Acid	Tryptophan Metabolism	48782	LC/MS Pos Early	100006379	2700	367.15	10981970	180509-18-6		0.3298	0.3298	0.3298	0.3298	1	0.3298	0.3298	0.3298	0.3298	0.3298	0.3298	1.065	0.3298	0.9887	1.2127	0.3298	0.8925	0.3885	3.9349	7.598	0.39682	1.70697	4.30162
glutamine_degradant*	Partially Characterized Molecules	Partially Characterized Molecules	46225	LC/MS Pos Early	100001540	1900	129.066		2353-44-8		0.1336	0.1667	0.4112	0.185	1.4006	2.1851	0.073	0.7606	0.5204	0.3002	0.4743	1	1.9964	2.1641	2.6581	0.073	1.3795	3.4502	8.0078	4.9985	0.61364	2.62019	4.26991
5-methylthioadenosine (MTA)	Amino Acid	Polyamine Metabolism	1419	LC/MS Pos Early	212	2752	298.097	439176	2457-80-9	C00170	0.2371	0.7584	1	0.2371	0.2371	0.4695	0.6666	0.2778	1.2073	0.2371	0.4723	0.9703	2.0402	1.243	2.35	0.2371	1.4793	0.2371	5.192	7.8941	0.5328	2.21154	4.15079
methyl-4-hydroxybenzoate sulfate	Xenobiotics	Benzoate Metabolism	48429	LC/MS Neg	100006116	2873	230.997	10657183			0.8883	0.4916	1.7925	0.4476	3.9121	1.7127	0.1921	0.2133	0.8284	0.6139	0.1886	6.453	2.253	1.1117	5.9061	0.2723	3.5828	1.4371	24.0926	0.6183	1.10925	4.59155	4.13933
1-stearoyl-2-arachidonoyl-GPE (18:0/20:4)	Lipid	Phosphatidylethanolamine (PE)	52447	LC/MS Pos Late	100008977	2475	768.554	5289133		C05210	0.5559	0.5559	0.9001	0.5559	0.9335	0.599	1.0374	0.5559	0.889	0.5559	0.5559	5.0628	0.5559	0.917	4.2361	1.0017	2.4284	0.9983	4.2518	7.7208	0.71385	2.77287	3.88439
hypotaurine	Amino Acid	Methionine, Cysteine, SAM and Taurine Metabolism	590	LC/MS Pos Early	358	724	110.027	107812	300-84-5	C00519	0.1549	0.3983	1.1614	0.0758	0.5175	2.4527	1	0.0758	0.5434	1.2248	0.0758	0.4648	0.4824	1.8682	4.7851	0.0758	1.4161	0.4478	1.1739	18.4941	0.76046	2.9284	3.85083
arachidonate (20:4n6)	Lipid	Long Chain Polyunsaturated Fatty Acid (n3 and n6)	1110	LC/MS Neg	229	5535	303.233	444899	506-32-1	C00219	0.2846	0.175	1.1926	0.1665	1.6925	0.1665	0.6036	0.2716	1.4071	0.5006	0.1665	1.7883	0.1665	0.9476	3.0096	0.4952	2.8221	1.0952	1	12.8145	0.64606	2.43055	3.76211
2-O-methylascorbic acid	Cofactors and Vitamins	Ascorbate and Aldarate Metabolism	63990	LC/MS Polar	100003258	1512	189.041	54726398	17860-87-6		0.4468	0.5884	1	0.3817	1.3402	1.1993	0.8158	0.2886	0.7653	0.4948	0.3615	1.6419	1.2223	1.542	2.4867	0.2886	1.4464	0.7738	7.1695	10.1833	0.73209	2.7116	3.70392
N-acetylhistidine	Amino Acid	Histidine Metabolism	33946	LC/MS Pos Early	100001293	2065	198.087	75619	39145-52-3	C02997	0.2103	0.2103	0.2103	0.2103	0.2103	0.2103	0.2103	0.2103	0.2103	0.2103	0.2103	0.2103	0.2103	0.2103	1.252	0.2103	0.748	0.2103	0.2103	4.3001	0.2103	0.77722	3.69577
ergothioneine	Xenobiotics	Food Component/Plant	37459	LC/MS Pos Early	100002154	850	230.096	5351619	58511-63-0	C05570	0.4263	0.1801	0.8916	0.1647	1.1084	4.8312	0.3679	0.1647	0.5052	0.5774	0.1647	1.8885	0.1647	1.1372	2.3439	0.1647	5.2095	0.2938	3.3658	18.8676	0.92175	3.36004	3.64528
1-(1-enyl-palmitoyl)-2-palmitoyl-GPC (P-16:0/16:0)*	Lipid	Plasmalogen	52716	LC/MS Pos Late	100009162	2550	718.574	11146967			0.3109	0.3109	0.3109	0.3109	1	0.3109	0.3109	0.3109	0.3109	0.3109	0.3891	2.0715	0.3109	0.3613	3.1634	0.9789	1.4087	0.9338	1.835	2.336	0.37981	1.37886	3.63039
sphingomyelin (d18:2/24:1, d18:1/24:2)*	Lipid	Sphingomyelins	52437	LC/MS Pos Late	100008957	2750	811.669	85336023			0.1354	0.1354	0.1354	0.1354	0.1354	0.1354	0.1354	0.5103	0.1354	0.1354	0.1354	1.2754	0.1354	0.1354	1	0.1354	0.276	0.1354	1.8008	1.2325	0.17289	0.62617	3.62178
glucuronate	Carbohydrate	Aminosugar Metabolism	15443	LC/MS Polar	100000257	3233.3	193.035	441478;94715;23677976;65041;444791	207300-70-7	C16245	0.2092	0.2092	0.2092	0.2092	1.0568	0.2092	0.2092	0.2092	0.2092	0.2092	0.2092	0.9598	0.2092	0.2092	1.0402	0.2092	0.4507	0.4889	1.7609	4.9879	0.29396	1.05252	3.58049
1-(1-enyl-palmitoyl)-2-linoleoyl-GPE (P-16:0/18:2)*	Lipid	Plasmalogen	52677	LC/MS Pos Late	100009069	2400	700.528	52925127			0.2352	0.2352	0.2352	0.2352	0.2352	0.2352	0.2352	0.2352	0.2352	0.2352	0.2352	1.4111	0.2352	0.2608	1	0.2352	0.2352	0.2367	2.3504	1.9976	0.2352	0.81974	3.48529
threonate	Cofactors and Vitamins	Ascorbate and Aldarate Metabolism	27738	LC/MS Polar	100001022	2384	135.03	5460407;151152	70753-61-6	C01620	0.3991	0.8785	1.3963	0.3396	0.882	1.6945	1.6688	0.1991	0.5101	0.6732	0.403	2.4644	1.118	1.7233	3.1254	0.2009	1.6223	0.5429	10.2469	8.4842	0.86412	2.99313	3.46379
taurine	Amino Acid	Methionine, Cysteine, SAM and Taurine Metabolism	2125	LC/MS Pos Early	512	660	126.022	1123	107-35-7	C00245	0.6363	0.588	1.2497	0.318	0.8685	1.0338	1.0759	0.3961	0.559	0.7335	0.3346	1.84	0.9662	1.9927	2.8121	0.5191	1.6795	1.3975	7.0356	7.0956	0.74588	2.56729	3.44196
valylglycine	Peptide	Dipeptide	40475	LC/MS Neg	100003641	1506	173.093	136487	686-43-1		0.5986	0.5986	0.5986	0.5986	0.5986	0.5986	0.5986	0.5986	0.5986	0.5986	0.5986	0.7622	0.5986	0.7479	1.2378	0.5986	0.5986	0.5986	5.0987	9.6231	0.5986	2.04627	3.41843
NAD+	Cofactors and Vitamins	Nicotinate and Nicotinamide Metabolism	5278	LC/MS Neg	1310	1434	662.102	5892	53-84-9	C00006	0.3836	0.8924	0.346	0.7433	0.2909	1.1076	0.5648	0.5123	1.2195	1.4537	0.3457	1.3332	0.7655	1.2399	1.3045	0.5818	1.6205	1.6705	7.5069	9.1533	0.75141	2.55218	3.39652
1-ribosyl-imidazoleacetate*	Amino Acid	Histidine Metabolism	61868	LC/MS Pos Early	100001668	2006	259.092	440569	29605-99-0	C05131	0.3107	0.3107	0.3107	0.3107	0.3107	0.3107	0.3107	0.3107	0.3107	0.3107	0.3107	0.5956	0.3107	0.3107	0.3107	0.3107	0.3107	0.3107	1.4044	6.2735	0.3107	1.04484	3.36286
X - 22772			48077	LC/MS Neg							0.3896	0.3896	1.0104	0.3896	0.3896	0.3896	0.6656	0.3896	0.6129	0.3896	1.3499	0.3896	1.5098	3.7815	0.7898	0.9896	1.7154	0.3896	0.8281	5.1017	0.50161	1.6845	3.35819
thymine	Nucleotide	Pyrimidine Metabolism, Thymine containing	604	LC/MS Neg	882	1654	125.036	1135	65-71-4	C00178	0.4186	0.4186	0.4186	0.4186	0.4186	0.4186	0.4186	0.4186	0.4186	0.4186	0.4186	0.4303	0.4186	0.4186	1.5697	0.4186	0.4186	0.4186	0.4186	9.1172	0.4186	1.40474	3.35581
phenylacetylglutamine	Peptide	Acetylated Peptides	35126	LC/MS Neg	100001417	2330	263.104	92258	28047-15-6	C04148	0.2571	0.1311	0.8765	0.5867	1.2704	0.3166	0.2623	0.8724	1.5809	0.3107	2.477	2.9294	3.9013	1.1235	3.7481	0.4063	2.2445	4.5906	0.1311	0.1311	0.64647	2.16829	3.35405
butyrylcarnitine (C4)	Lipid	Fatty Acid Metabolism (also BCAA Metabolism)	32412	LC/MS Pos Early	100001054	2860	232.154	439829	25576-40-3	C02862	0.1391	0.1391	0.2377	0.1391	0.1391	3.3685	0.1391	0.1391	0.1391	0.1391	0.1391	0.1391	0.1391	0.1391	0.7692	0.1391	1.2308	0.3695	3.6419	9.1019	0.4719	1.58088	3.35003
malate	Energy	TCA Cycle	1303	LC/MS Polar	409	3343.1	133.014	525	6915-15-7	C00497,C00149,C00711	0.7075	0.9083	1.2086	0.3951	1.8126	0.9374	1.3541	0.3289	0.9934	1.0066	0.4907	1.2694	0.4662	2.6928	2.4073	0.3412	1.5514	0.6447	6.4599	15.4106	0.96525	3.17342	3.28767
2-aminophenol sulfate	Xenobiotics	Food Component/Plant	43266	LC/MS Neg	100004322	1677	188.002	181670			0.4077	0.4077	0.4077	0.4077	0.7294	0.4077	0.4077	0.4077	0.4077	0.4077	0.4077	1.2706	0.4536	0.4077	0.5401	0.4077	2.3442	0.4077	3.6249	4.4201	0.43987	1.42843	3.24739
erythronate*	Carbohydrate	Aminosugar Metabolism	42420	LC/MS Polar	100001320	2186	135.03	2781043	88759-55-1		0.3912	0.9449	1.0207	0.4168	1.1467	1.2589	0.7101	0.5176	0.9491	0.5723	0.6654	1.361	1.0077	1.2352	2.6751	0.363	1.5378	0.9923	6.1616	9.5429	0.79283	2.5542	3.22162
2'-deoxyadenosine 3'-monophosphate	Nucleotide	Purine Metabolism, Adenine containing	40663	LC/MS Pos Early	100003420	1240	332.075	167350	102832-10-0		0.197	0.197	0.197	0.197	0.197	0.197	0.197	0.197	0.197	0.197	0.197	1.4087	0.197	0.197	1	0.197	0.197	0.583	0.197	2.1451	0.197	0.63188	3.20751
kynurenate	Amino Acid	Tryptophan Metabolism	1417	LC/MS Neg	98	2224	188.035	3845	492-27-3	C01717	0.5723	0.5723	0.5723	0.5723	1	0.5723	0.5723	0.5723	0.5723	0.5723	0.5723	0.9466	0.5869	0.5723	0.5723	0.5723	0.5723	2.1318	7.7769	4.9151	0.61507	1.92188	3.12465
alpha-hydroxyisovalerate	Amino Acid	Leucine, Isoleucine and Valine Metabolism	46537	LC/MS Polar	100001300	1052	117.056	99823	600-37-3		0.3388	0.4154	0.8311	0.5346	0.6297	1.0209	0.7024	1.4795	1.3668	0.3388	0.9791	0.3388	3.4686	1.3646	1.9788	0.4677	1.9027	0.8366	2.5623	9.9134	0.7658	2.38126	3.10951
uridine	Nucleotide	Pyrimidine Metabolism, Uracil containing	606	LC/MS Neg	535	1457.6	243.062	6029	58-96-8	C00299	0.2407	1.0689	4.0578	0.2784	2.5297	0.9311	0.914	0.1637	0.8677	0.3385	0.3668	3.3677	1.1845	0.7161	3.4165	0.3883	3.0873	1.5073	9.8265	11.0719	1.13905	3.49329	3.06685
stachydrine	Xenobiotics	Food Component/Plant	34384	LC/MS Pos Early	100001296	1440	144.102	115244	4136-37-2	C10172	0.4831	0.7876	0.5694	1.6791	0.608	2.4509	0.2989	1.0805	1.0096	0.5578	0.2396	1.2798	1.007	0.2515	8.0706	0.2218	0.993	2.2725	7.9918	6.4771	0.95249	2.88047	3.02415
mannonate*	Xenobiotics	Food Component/Plant	62864	LC/MS Polar	100003695	2736	195.051	3246006	642-99-9		0.3789	0.3789	0.3789	0.3789	0.6447	0.3789	0.3789	0.3789	0.3789	0.3789	0.3789	1	0.416	0.3789	1.2345	0.3789	0.3789	0.3789	5.4204	2.2772	0.40548	1.22426	3.01929
3-methyl-2-oxobutyrate	Amino Acid	Leucine, Isoleucine and Valine Metabolism	44526	LC/MS Polar	100000936	911	115.04	49	3715-29-5	C00141	0.3685	0.5538	1.4709	0.3685	1.1774	0.6487	0.3685	0.3685	1	0.3685	0.3685	0.3685	0.9662	0.9419	0.3685	0.3685	1.399	0.3685	6.2016	8.8493	0.66933	2.02005	3.01802
glycine	Amino Acid	Glycine, Serine and Threonine Metabolism	58	LC/MS Pos Early	340	1375	76.0393	750	56-40-6	C00037	0.7218	0.5163	1.2939	0.5105	0.9253	1.2961	1.0187	0.5256	0.6698	0.9813	0.2781	1.5602	0.6485	1.1033	2.4231	0.3172	1.496	1.049	5.1255	11.5144	0.84593	2.55153	3.01624
stearoyl sphingomyelin (d18:1/18:0)	Lipid	Sphingomyelins	19503	LC/MS Pos Late	1538	2450	731.606	6453725	85187-10-6;85187-10-6	C00550	0.2969	0.2969	0.2969	0.2969	0.5339	0.2969	0.2969	0.9942	0.2969	0.2969	0.2969	1.2336	0.2969	0.2969	2.5567	0.2969	1	0.4717	1.8895	3.1222	0.39033	1.14613	2.93631
creatine	Amino Acid	Creatine Metabolism	27718	LC/MS Pos Early	1221	1947	132.077	586	57-00-1	C00300	1.2549	0.4965	1.6627	0.3706	1.0743	0.8978	0.9257	0.6561	0.8568	0.9177	0.8599	1.9192	0.6519	1.2707	2.9085	0.3756	2.5381	1.5873	2.9585	11.6367	0.91131	2.67064	2.93055
1-stearoyl-2-arachidonoyl-GPI (18:0/20:4)	Lipid	Phosphatidylinositol (PI)	52449	LC/MS Polar	100000616	870	885.549		383907-33-3		0.4974	0.4974	0.4974	0.4974	0.4974	0.6357	0.736	0.6651	0.6438	0.4974	0.5925	2.7707	0.4974	1.2344	2.1522	1.2121	1.0189	0.9811	2.2613	3.6851	0.5665	1.64057	2.89598
guaiacol sulfate	Xenobiotics	Benzoate Metabolism	46111	LC/MS Neg	100004208	2344	203.002	22473			0.5252	0.663	0.9659	0.7259	3.2229	0.5252	0.5252	0.6783	0.5407	0.5252	0.5252	0.5252	3.0398	3.0879	0.5252	1.0341	2.0274	3.1903	0.5351	10.9866	0.88975	2.54768	2.86337
3-aminoisobutyrate	Nucleotide	Pyrimidine Metabolism, Thymine containing	1566	LC/MS Pos Early	1114	2190	104.071	64956	10569-72-9;214139-20-5	C05145	0.7022	1.2281	1.1928	0.3544	1	1.3724	0.8749	0.9142	0.3544	0.4158	1.423	1.9329	0.3816	0.3544	0.7522	0.3544	2.7036	0.8593	1.3416	13.8874	0.84092	2.39904	2.85288
allantoin	Nucleotide	Purine Metabolism, (Hypo)Xanthine/Inosine containing	1107	LC/MS Polar	1002	1672	157.037	204;439714;439713	97-59-6	C02350,C02348,C01551	0.3836	0.3836	0.3887	0.3836	2.5082	1	0.3836	0.3836	0.4835	0.3836	0.4785	0.9445	0.8247	1.6407	2.3019	0.4166	1.7779	1.1539	4.8971	4.5211	0.6682	1.89569	2.83701
propionylcarnitine (C3)	Lipid	Fatty Acid Metabolism (also BCAA Metabolism)	32452	LC/MS Pos Early	100001162	2590	218.139	107738	17298-37-2	C03017	0.7744	0.7465	1.5471	0.3216	0.8672	1.6373	1.1087	0.4139	1.1771	0.7281	0.8975	1.3677	0.4472	0.5012	1.11	0.3234	1.8097	1.1025	4.8144	13.782	0.93219	2.61556	2.80582
5-(galactosylhydroxy)-L-lysine	Amino Acid	Lysine Metabolism	43582	LC/MS Pos Early	100002462	2755	325.161	66995551	32448-36-5		0.6885	2.9088	0.9845	0.6885	0.9544	0.8495	1.0155	0.6885	2.2779	0.6885	1.0808	0.6885	25.9766	0.6885	0.6885	0.6885	0.972	0.6885	0.6885	0.6885	1.17446	3.28489	2.79694
fumarate	Energy	TCA Cycle	1643	LC/MS Polar	330	3084	115.004	444972	100-17-8	C00122	0.4334	0.6583	1.1417	0.4334	1.4551	0.9658	1.0168	0.4334	0.7089	0.6436	0.4334	0.9832	0.5031	2.1347	2.207	0.4334	1.3017	0.6914	4.007	9.343	0.78904	2.20379	2.793
1-palmitoyl-2-palmitoleoyl-GPC (16:0/16:1)*	Lipid	Phosphatidylcholine (PC)	52470	LC/MS Pos Late	100008984	2200	732.554	6443788			0.7365	0.7466	0.8246	0.5162	1.2405	0.8677	0.9013	0.6825	1.6909	1.1537	3.0765	6.6272	0.8427	1.0674	4.1214	1.9864	3.102	3.4702	0.8098	0.9326	0.93605	2.60362	2.7815
pipecolate	Amino Acid	Lysine Metabolism	1444	LC/MS Pos Early	1025	2200	130.086		4043-87-2		0.7457	0.5634	0.5634	0.5634	1.0355	1	0.5634	1.0369	0.6995	0.936	0.5634	0.9105	1.748	0.8327	0.6969	0.5634	2.0271	1.2895	1.8842	10.3959	0.77072	2.09116	2.71326
sphinganine	Lipid	Sphingolipid Synthesis	17769	LC/MS Pos Late	313	1413	302.305	3126	3102-56-5	C00836	0.3762	0.6933	0.8013	0.3762	0.3762	0.3762	0.9342	0.3762	0.8455	0.3762	0.3762	2.5373	0.3762	0.3762	3.7339	1	1.272	0.3762	2.9747	1.5927	0.55315	1.46154	2.64221
benzoate	Xenobiotics	Benzoate Metabolism	15778	LC/MS Neg	100000008	1750	121.029	243	65-85-0	C00180	0.775	0.4715	0.4715	0.4715	0.4715	0.6911	0.4715	1.4665	0.8582	0.4715	1.0221	0.4715	0.7805	0.9779	0.4715	1.1845	1.1185	0.4715	2.4335	8.4342	0.66198	1.73657	2.6233
pyruvate	Carbohydrate	Glycolysis, Gluconeogenesis, and Pyruvate Metabolism	48990	LC/MS Polar	823	1083	87.0088	1060	127-17-3	C00022	0.1007	0.6263	0.9784	0.1007	1.6437	0.1007	0.2085	0.4874	1.2326	0.1007	0.1007	0.5307	1	1.2049	1.3561	0.1007	1.9718	0.3842	2.3251	5.1986	0.55797	1.41728	2.54006
1-palmitoyl-2-oleoyl-GPG (16:0/18:1)	Lipid	Phosphatidylglycerol (PG)	52448	LC/MS Pos Late	100000641	3206	766.559	70789105			1.109	0.3411	0.3411	0.3411	0.6394	0.3411	0.8221	0.3411	0.649	1.7168	2.9486	4.1625	0.3411	0.6089	4.1813	0.3411	2.6136	0.891	0.3411	0.3411	0.66418	1.67703	2.52496
N,N,N-trimethyl-5-aminovalerate	Amino Acid	Lysine Metabolism	57687	LC/MS Pos Early	100015962	2186	160.133	14274897			0.3924	0.7333	1.7201	0.3271	1.0188	0.5603	0.6907	0.5153	0.9812	0.6973	1.1049	1.0242	1.5906	0.7121	1.4703	0.3112	1.5703	1.2258	2.3388	7.916	0.76365	1.92642	2.52265
1-palmitoyl-2-oleoyl-GPC (16:0/18:1)	Lipid	Phosphatidylcholine (PC)	52461	LC/MS Pos Late	1539	2450	760.585	6436017	26853-31-6;26853-31-6	C13875	1.0321	0.355	0.5738	0.3823	1.1823	0.68	0.7315	0.6904	0.9679	0.8489	1.3865	3.5859	0.5181	0.7518	3.1465	1.2125	1.7249	1.6197	1.6713	2.7555	0.74442	1.83727	2.46806
5'- GMP	Nucleotide	Purine Metabolism, Guanine containing	2849	LC/MS Pos Early	347	800	364.065	6804	1950-12-09	C00144	0.5305	0.9148	0.1397	0.4339	0.3583	1.0852	1.3593	0.3172	1.7914	0.6215	0.5088	1.724	0.7518	1.366	1.7361	0.2847	1.5367	1.1526	6.0176	3.3671	0.75518	1.84454	2.44252
alpha-ketoglutarate	Energy	TCA Cycle	528	LC/MS Polar	93	2700	145.014	51	305-72-6;328-50-7;22202-68-2	C00026	0.4597	0.7104	1.7852	0.4202	1.5209	1.026	1.1558	0.5759	0.9153	0.3834	0.4651	1.4585	0.974	1.6526	2.3364	0.4686	2.0411	0.6681	3.9878	7.6962	0.89528	2.17484	2.42923
deoxycarnitine	Lipid	Carnitine Metabolism	36747	LC/MS Pos Early	100001662	2052	146.118	22620	6249-56-5	C01181	0.596	0.9082	1.505	0.2547	1.0036	1.3286	0.9964	0.3967	0.7881	0.4787	1.3143	1.3029	0.5851	0.8545	1.697	0.4612	2.277	1.3424	3.0153	7.0836	0.8256	1.99333	2.4144
N1-Methyl-2-pyridone-5-carboxamide	Cofactors and Vitamins	Nicotinate and Nicotinamide Metabolism	40469	LC/MS Neg	100001468	1668	151.051	69698	701-44-0	C05842	0.4578	0.1865	1.0761	0.2488	1.5483	1.1893	0.5272	0.3059	1.0114	0.316	0.3217	0.855	1.3407	1.1617	1.3431	0.514	2.1077	0.9886	3.0444	4.5557	0.68673	1.62326	2.36375
1-(1-enyl-palmitoyl)-2-arachidonoyl-GPC (P-16:0/20:4)*	Lipid	Plasmalogen	52689	LC/MS Pos Late	100009014	2200	766.574				0.5524	0.7123	0.6696	0.5524	0.7125	0.6518	1.108	1.1323	0.5524	0.5524	0.5524	2.5303	0.5524	0.5678	3.879	0.892	1.8883	0.5524	1.8184	3.7456	0.71961	1.69786	2.35942
cysteine s-sulfate	Amino Acid	Methionine, Cysteine, SAM and Taurine Metabolism	22176	LC/MS Neg	100000808	640.9	199.969	115015	1637-71-4	C05824	0.8544	0.7476	1.3106	0.8869	0.7344	1.2494	1.1296	0.9178	0.9475	0.8451	0.5938	1.3052	1.0128	0.9872	1.4506	0.7333	1.2509	1.1615	1.4915	12.1655	0.96233	2.21523	2.30194
1-myristoyl-2-palmitoyl-GPC (14:0/16:0)	Lipid	Phosphatidylcholine (PC)	19258	LC/MS Pos Late	100000672	2250	706.538	129657	69525-80-0		0.4311	0.369	0.9061	0.4628	1.5026	1.0477	0.7873	0.5172	1.6608	0.9523	2.0257	4.0691	0.9372	1.1294	4.0646	1.5997	2.1093	2.4474	0.587	0.3541	0.86369	1.93235	2.23732
X - 24432			52662	LC/MS Pos Early							0.6239	0.6308	1.3635	0.2835	1.9779	0.2835	0.9539	0.2835	1.0264	0.7281	0.2865	3.5957	0.8462	1	2.9451	0.2835	2.7722	0.7251	1.6186	4.139	0.8155	1.82119	2.23322
sphingosine	Lipid	Sphingosines	17747	LC/MS Pos Late	297	1393	300.29	5280335	123-78-4	C00319	0.9397	0.6101	1.3612	0.6364	1.633	0.3192	1.1078	0.3637	0.8845	0.5649	0.7584	2.4945	0.561	0.6547	4.8653	1.3078	2.5179	1.0603	1.8258	2.7199	0.84205	1.87656	2.22856
methyl-4-hydroxybenzoate	Xenobiotics	Benzoate Metabolism	34386	LC/MS Neg	100001252	3671	151.04	7456	99-76-3	D01400	0.3188	0.1682	0.2476	0.1682	11.1767	11.0368	0.1682	0.2253	0.1682	0.1682	0.1682	2.3643	0.7048	0.1682	2.7732	0.1682	0.6308	1.2952	44.5949	0.1682	2.38462	5.3036	2.22409
glutarate (C5-DC)	Lipid	Fatty Acid, Dicarboxylate	396	LC/MS Polar	339	2900	131.035	743;4418048	110-94-1	C00489	0.4624	0.4624	0.4624	0.6439	1.0467	0.4624	1	0.4624	0.4624	0.8714	0.4624	1.4167	0.7879	1.1324	1.4834	0.4624	0.9074	0.9854	5.1977	1.2234	0.63364	1.40591	2.21878
AMP	Nucleotide	Purine Metabolism, Adenine containing	32342	LC/MS Pos Early	209	1013	348.07	6083	149022-20-8	C00020	0.9844	0.4663	0.0323	0.3687	0.194	1.2735	1.4212	0.5486	1.174	0.8072	0.5345	1.8011	0.8172	1.4922	1.9646	0.3697	1.6298	1.0156	4.4922	2.0042	0.72702	1.61211	2.21742
cytidine 2' or 3'-monophosphate (2' or 3'-CMP)	Nucleotide	Pyrimidine Metabolism, Cytidine containing	61705	LC/MS Pos Early	100019915	847	324.059	53481031;66535		C03104,C05822	0.5152	0.9344	0.6955	0.4811	1.3538	0.9207	0.7148	0.1232	1.9175	0.2768	0.5369	1.5978	1.0656	1.3772	2.6549	0.2505	2.8223	1.081	3.0316	2.124	0.7933	1.65418	2.08519
azithromycin	Xenobiotics	Drug - Antibiotic	52966	LC/MS Pos Late	100008963	918	749.516	447043	83905-01-5	D06390,C06838,DG00606	0.3895	0.3895	0.3895	0.3895	0.3895	0.3895	0.3895	0.3895	0.3895	0.3895	0.3895	0.3895	0.3895	0.8393	3.3535	0.3895	0.3895	0.3895	1.1607	0.3895	0.3895	0.808	2.07445
ribonate	Carbohydrate	Pentose Metabolism	27731	LC/MS Polar	100001007	2425	165.041	5460677	1936-08-03	C01685	0.4012	0.4012	0.4012	0.4012	1	0.4012	0.4012	0.4012	0.4012	0.4012	0.4012	1.1932	0.4012	0.4012	0.637	0.4012	0.4012	0.4449	2.0437	3.2383	0.46108	0.95631	2.07407
1-palmitoyl-2-stearoyl-GPC (16:0/18:0)	Lipid	Phosphatidylcholine (PC)	52616	LC/MS Pos Late	100008921	2750	762.601	24778686	59403-51-9	C03889	0.8319	0.2567	0.5808	0.3892	2.2595	0.959	0.772	0.2585	1.041	1.1774	1.5967	4.5859	0.4897	0.7674	2.302	1.1992	2.068	0.9214	1.7372	1.8407	0.8526	1.75082	2.05351
lyxonate	Carbohydrate	Pentose Metabolism	61858	LC/MS Polar	100019968	2350	165.041				0.6974	0.9053	0.9772	0.3055	2.1834	0.6575	1.0228	0.3055	0.3055	1.7865	0.3055	2.5067	0.3055	0.3055	2.4063	0.3055	0.9635	0.4244	5.5736	5.6422	0.91466	1.87387	2.04871
N-acetylneuraminate	Carbohydrate	Aminosugar Metabolism	32377	LC/MS Pos Early	1162	660	310.113	439197	131-48-6	C00270	0.298	0.6209	0.8201	0.2313	3.5149	1.2561	0.5964	0.154	1.2333	0.1868	0.3925	2.1401	1.1799	0.6745	1.3311	0.5748	1.9229	1.417	3.1751	5.2836	0.89118	1.80915	2.03006
X - 23639			49515	LC/MS Pos Early							0.381	0.381	0.8775	0.381	0.6954	0.8262	0.6892	1	0.381	0.381	0.381	1.4237	1.5206	0.381	1.3493	0.381	1.0017	0.9405	1.7384	2.7385	0.59933	1.18557	1.97816
X - 12798			46624	LC/MS Pos Early							0.2786	0.2786	1.1151	0.2786	0.5851	0.2786	1.0841	0.2786	1.5214	0.4479	0.2786	0.2786	0.2786	0.2786	0.4857	0.2786	0.9159	0.2786	2.4664	6.2001	0.61466	1.17397	1.90995
glycerate	Carbohydrate	Glycolysis, Gluconeogenesis, and Pyruvate Metabolism	1572	LC/MS Polar	1052	2070.4	105.019	752;439194	600-19-1	C00258	0.751	0.8727	1.3037	0.4626	1.0731	1.8473	1.2142	0.5523	0.7774	0.9269	0.4485	1.8483	0.7767	1.4322	1.8281	0.2845	1.7667	0.587	3.5811	6.0793	0.97812	1.86324	1.90492
behenoyl sphingomyelin (d18:1/22:0)*	Lipid	Sphingomyelins	48492	LC/MS Pos Late	100006294	3250	787.669	44260125			0.3001	0.3001	0.3001	0.3001	0.8744	0.3269	0.3001	1.089	0.3001	0.3001	0.3001	1	0.3001	0.3001	1.9358	0.3001	0.3001	0.5496	1.2969	2.0459	0.4391	0.83287	1.89677
1,2-dipalmitoyl-GPC (16:0/16:0)	Lipid	Phosphatidylcholine (PC)	19130	LC/MS Pos Late	100000657	2450	734.569	452110	63-89-8	D03585	0.7813	0.4801	0.6786	0.4116	1.4458	1.0384	0.9616	0.3362	1.2214	1.2443	1.8235	3.8286	0.6179	0.6978	2.8958	1.3157	2.3607	1.3843	0.8209	0.5411	0.85993	1.62863	1.89391
catechol sulfate	Xenobiotics	Benzoate Metabolism	35320	LC/MS Neg	100001605	1906	188.986	3083879	4918-96-1		0.5146	0.2895	2.3625	0.9269	2.6196	1.9668	0.4186	1.4509	0.6711	0.6038	1.0206	0.9794	5.4046	0.9119	0.6941	1.2861	1.9011	3.0459	0.554	6.2175	1.18243	2.20152	1.86186
nicotinamide	Cofactors and Vitamins	Nicotinate and Nicotinamide Metabolism	594	LC/MS Pos Early	432	1942	123.055	936	98-92-0	C00153	0.672	0.8	1.281	0.2789	0.9885	0.9123	0.9912	0.2789	1.0246	0.2789	0.2789	1.7105	0.8328	1	2.8615	0.2789	1.8491	0.2789	1.9692	2.7963	0.75063	1.38561	1.84593
1-stearoyl-GPE (18:0)	Lipid	Lysophospholipid	42398	LC/MS Pos Late	100001461	1626	482.324	9547068	69747-55-3		0.6593	0.6593	0.6593	0.6593	0.7437	0.6593	0.6593	0.6593	0.6593	0.6593	0.6593	1.8294	0.6593	0.6593	1.1977	0.6593	0.6593	0.6593	0.8023	4.3365	0.66774	1.21217	1.81533
inosine	Nucleotide	Purine Metabolism, (Hypo)Xanthine/Inosine containing	1123	LC/MS Neg	361	1602.1	267.074	6021	58-63-9	C00294	0.1188	1.0902	2.8084	0.233	3.1478	1.0053	1.8508	0.1075	0.7463	0.299	0.2071	2.1953	0.9947	0.458	2.2937	0.4186	2.5548	0.916	5.6641	4.9688	1.14071	2.06711	1.81213
3-hydroxy-3-methylglutarate	Lipid	Mevalonate Metabolism	531	LC/MS Polar	112	2850	161.046	1662;5459993	503-49-1	C03761	0.6264	0.6264	0.9392	0.6777	2.204	0.811	0.7483	0.6264	1.16	1.0528	0.6264	0.9472	0.6264	0.8958	1.6988	0.6264	1.8567	0.6264	3.6356	5.5545	0.94722	1.70942	1.80467
palmitoylcarnitine (C16)	Lipid	Fatty Acid Metabolism (Acyl Carnitine, Long Chain Saturated)	44681	LC/MS Pos Late	100000776	1425	400.342	461	6865-14-1	C02990	1.0451	0.829	1.0437	0.5376	1.2916	1	0.6016	0.5564	0.7772	0.815	1.2529	0.8543	0.644	1.0288	2.4937	0.5376	1.1486	0.6201	1.6676	4.9955	0.84972	1.52431	1.7939
CMP	Nucleotide	Pyrimidine Metabolism, Cytidine containing	2372	LC/MS Pos Early	282	835	324.059	6131	63-37-6	C00055	0.4619	1.0392	1.0626	0.3652	0.8689	1.0302	1.336	0.3129	1.6059	0.572	0.3811	1.5198	0.9698	0.8321	1.5402	0.3447	1.5536	0.707	3.3061	4.1971	0.86548	1.53515	1.77376
isoleucylglycine	Peptide	Dipeptide	40008	LC/MS Neg	100003169	1992	187.109	342532	868-28-0		0.6446	0.6446	0.6446	0.6446	0.6446	0.6446	0.6446	0.6446	0.6446	0.6446	0.6446	0.8608	0.6446	0.6446	0.9447	0.6446	0.6446	1.0553	3.0284	2.2552	0.6446	1.13674	1.76348
dimethylglycine	Amino Acid	Glycine, Serine and Threonine Metabolism	5086	LC/MS Pos Early	806	1104	104.071	673	1118-68-9	C03626	0.8453	0.7956	1.9744	0.4694	0.8302	1.955	0.4498	1	0.7743	0.6163	0.9149	0.6231	1.4524	1.0571	1.5376	0.4498	1.5895	1.5105	3.7281	4.1745	0.97103	1.70375	1.75458
N-acetylleucine	Amino Acid	Leucine, Isoleucine and Valine Metabolism	1587	LC/MS Neg	1082	2400	172.098	70912	1188-21-2	C02710	0.2119	0.2119	0.2119	0.2119	0.2119	0.2119	0.2119	0.2119	0.2119	0.2119	0.2119	0.2119	0.2119	0.2119	0.2119	0.2119	0.2119	0.2119	0.2119	1.7881	0.2119	0.36952	1.74384
androstenediol (3beta,17beta) disulfate (1)	Lipid	Androgenic Steroids	37202	LC/MS Neg	100001992	3740	224.062	87120982		C04295	0.1649	0.1569	0.3923	0.2403	0.6832	0.1569	0.1569	1.3524	2.0311	0.1569	0.2949	0.1569	0.352	1.2584	1.2257	0.1569	1.2032	1	1.0938	2.7976	0.54918	0.95394	1.73703
(S)-3-hydroxybutyrylcarnitine	Lipid	Fatty Acid Metabolism (Acyl Carnitine, Hydroxy)	52984	LC/MS Pos Early	100009271	2340	248.149	71464477			0.6991	1.1231	0.8544	0.7762	1.361	1.0469	0.9275	0.8727	1.1545	1.0641	0.9531	0.8724	0.8911	1.4535	1.2717	0.5116	1.1306	0.8634	3.4663	5.3645	0.98795	1.67782	1.69828
mannitol/sorbitol	Carbohydrate	Fructose, Mannose and Galactose Metabolism	46142	LC/MS Polar	100001740	2320	181.072	6251;5780		C00392,C00794	0.5146	0.5146	0.8668	0.7494	1.1573	0.5146	0.5146	0.5146	1.1332	0.6043	0.5146	0.5146	1.6935	0.5146	0.5943	0.5146	1.3775	0.6226	4.1282	1.4897	0.7084	1.19642	1.6889
X - 11381			46347	LC/MS Neg							0.1437	0.4171	1	0.2706	1.6265	1.1532	0.9991	0.283	1.2573	0.645	0.4401	1.0368	0.429	0.4734	1.1352	0.1437	1.3793	1.0846	2.4618	4.5327	0.77955	1.31166	1.68259
creatinine	Amino Acid	Creatine Metabolism	513	LC/MS Pos Early	275	2055	114.066	588	60-27-5	C00791	0.5862	0.3713	1.3302	0.4734	2.4508	1.6096	0.468	0.8363	0.9692	0.3768	0.6824	1.0308	1.166	0.9669	1.529	0.3135	1.5493	1.2466	2.3175	5.0869	0.94718	1.58889	1.6775
hydroxyproline	Amino Acid	Urea cycle; Arginine and Proline Metabolism	32306	LC/MS Pos Early	1001	1064	132.065	5810	51-35-4	C01157	2.0579	0.8674	1.8409	0.5171	0.7452	1.0397	0.6935	1.1508	1.7822	1.0253	0.9747	0.9242	0.9068	0.6817	1.0742	0.276	4.2774	0.9341	2.2075	7.3637	1.172	1.96203	1.67409
ascorbic acid 2-sulfate	Cofactors and Vitamins	Ascorbate and Aldarate Metabolism	63590	LC/MS Neg	100009329	587	254.982	54676864			0.2556	0.2556	2.288	0.2556	1.425	2.2061	0.3361	0.2556	0.4742	0.3013	0.2556	0.9425	0.7526	0.4983	1.0575	0.2556	2.2156	0.2556	3.4994	3.7464	0.80531	1.34791	1.67378
trigonelline (N'-methylnicotinate)	Cofactors and Vitamins	Nicotinate and Nicotinamide Metabolism	32401	LC/MS Pos Early	100001092	1388	138.055	5570	535-83-1	C01004	2.1872	0.555	1.8129	0.767	1.2007	1.5801	0.5467	1.1149	1.2148	0.5393	1.3589	0.8851	0.2152	0.8648	0.6216	0.2152	0.6199	8.4535	0.2152	5.8292	1.15186	1.92786	1.67369
spermidine	Amino Acid	Polyamine Metabolism	485	LC/MS Pos Early	50	3355	146.165	1102	124-20-9	C00315	1.0308	1.0385	1.2578	0.5343	0.9899	0.8026	1.6058	0.4039	1.0101	0.9424	0.4127	1.4753	0.6108	0.9655	1.683	0.4673	1.5604	0.6724	5.2428	2.9615	0.96161	1.60517	1.66925
1-stearoyl-GPI (18:0)	Lipid	Lysophospholipid	19324	LC/MS Neg	100000656	5794	599.32	71581135;42607495	796963-93-4		0.5053	0.5053	0.5053	0.5053	0.7883	0.5053	0.5053	0.5053	0.5053	0.5053	0.5053	0.8669	0.5053	0.5053	2.161	0.5053	1.1331	0.5053	0.5053	1.7097	0.5336	0.89025	1.66838
sulfate*	Xenobiotics	Chemical	46960	LC/MS Neg	100002528	616	96.9601	5152822	14808-79-8	C00059	0.7746	0.7017	1.126	0.7827	1.2546	1.1686	0.4661	0.6719	0.8253	0.8556	0.774	1.0961	0.9164	1.1555	1.116	0.6018	1.2269	1.0836	3.3113	2.9376	0.86271	1.42192	1.6482
quinolinate	Cofactors and Vitamins	Nicotinate and Nicotinamide Metabolism	1899	LC/MS Pos Early	182	845	168.029	1066	89-00-9	C03722	0.2628	0.9789	0.4952	0.3358	13.2949	0.9058	2.158	0.5648	1.7676	0.2628	0.2628	5.0491	0.3282	0.7462	5.7207	1.0117	4.609	0.9883	3.266	12.5571	2.10266	3.45391	1.64264
3-hydroxypyridine sulfate	Xenobiotics	Chemical	48448	LC/MS Neg	100006098	1595.5	173.987		1955-23-3		0.668	0.668	0.668	1	5.4344	0.7102	0.668	1.4666	0.668	0.668	0.668	0.7501	0.668	0.8683	0.668	0.668	0.668	12.9817	0.668	1.9668	1.26192	2.05749	1.63044
ascorbate (Vitamin C)	Cofactors and Vitamins	Ascorbate and Aldarate Metabolism	32354	LC/MS Pos Early	233	770	177.039	54670067	134-03-2	C00072,D00018	0.3257	0.8745	2.8011	0.3257	0.8427	3.4616	2.7643	0.3257	0.5352	1.479	0.3257	2.6822	0.3257	1.1008	0.479	0.3257	0.8992	0.3441	15.5349	0.3257	1.37355	2.2343	1.62666
N,N,N-trimethyl-alanylproline betaine (TMAP)	Amino Acid	Urea cycle; Arginine and Proline Metabolism	62947	LC/MS Pos Early	100020217	2470	229.155				0.1732	0.4574	1.1244	0.2962	2.8285	1.9408	0.431	0.1845	1.3243	0.348	0.6028	1.1496	0.6588	1.135	1.9358	0.1732	1.4558	0.8756	6.4531	0.1732	0.91083	1.46129	1.60435
phosphate	Energy	Oxidative Phosphorylation	42109	LC/MS Pos Early	461	576	98.9842	1061	7664-38-2	C00009	0.5829	0.7441	1.5193	0.3798	1.0071	2.881	0.9489	0.6239	1.024	0.6883	0.4327	1.2658	0.9929	1.5624	2.2936	0.2703	1.8396	0.5662	4.5466	2.7821	1.03993	1.65522	1.59166
X - 25271			62500	LC/MS Pos Early							0.2549	0.2549	0.2549	0.2549	0.2549	0.2549	0.2549	0.2549	0.2549	0.2549	0.2549	0.2549	0.2549	0.2549	0.2549	0.2549	0.2549	0.2549	0.2549	1.7451	0.2549	0.40392	1.58462
maltose	Carbohydrate	Glycogen Metabolism	15586	LC/MS Polar	913	3329.4	387.114	10991489	6363-53-7	C00208	0.3555	2.0443	0.8689	0.2219	0.5392	1.2528	0.7637	0.275	1.3065	0.144	0.1115	1.895	1.3362	1	1.6378	0.4251	1.8942	1.4013	2.1375	0.1115	0.77718	1.19501	1.53762
3-amino-2-piperidone	Amino Acid	Urea cycle; Arginine and Proline Metabolism	62853	LC/MS Pos Early	100020361	2065	115.087	5200225	1892-22-4		1	0.6096	0.6096	0.6096	1.3063	3.4228	0.6096	0.6096	0.6096	0.9804	0.6096	0.9335	0.7147	1.1905	1.9013	0.6096	0.9947	0.7897	1.2088	6.9709	1.03671	1.59233	1.53595
caffeine	Xenobiotics	Xanthine Metabolism	569	LC/MS Pos Early	849	2106	195.088	2519	58-08-2	C07481	0.1072	0.1072	0.3173	1.1943	0.1072	0.1072	0.1072	1	1.8211	0.1072	0.1072	2.5537	0.1171	0.1072	0.1072	0.1072	0.1072	4.0666	0.2434	0.1072	0.49759	0.7624	1.53219
butyrate/isobutyrate (4:0)	Lipid	Short Chain Fatty Acid	40605	LC/MS Neg	1143	1062	87.0452	264	109-92-6	C00246	0.4973	0.4973	0.8477	0.4973	0.4973	0.8113	0.4973	0.4973	1.0417	0.9583	0.4973	0.4973	1.7307	1.0818	0.4973	1.0892	0.7902	0.4973	0.4973	2.9935	0.66428	1.01719	1.53127
carnitine	Lipid	Carnitine Metabolism	15500	LC/MS Pos Early	100000007	1978	162.113	288	461-05-2	C00487,C00308	0.8477	0.6633	2.2652	0.3962	0.7196	1.3527	0.9806	0.8044	0.5731	1.1807	1.4974	1.1441	1.0194	0.7075	1.1345	0.2978	2.0981	0.9613	2.0286	3.6612	0.97835	1.45499	1.48719
glucose	Carbohydrate	Glycolysis, Gluconeogenesis, and Pyruvate Metabolism	20488	LC/MS Polar	572	2342	179.056	5793	50-99-7	C00031	0.9475	0.7622	2.2951	0.4695	3.0826	1.8349	0.696	1.2402	1.0525	0.758	0.767	2.0659	0.804	0.6172	3.188	0.2811	2.4075	0.8744	6.7677	1.1748	1.31385	1.89476	1.44214
phenol sulfate	Amino Acid	Tyrosine Metabolism	32553	LC/MS Neg	100001510	2156	172.991	74426	937-34-8	C02180	0.6015	0.61	1.0945	1.2083	1.1036	0.897	0.5751	1.3581	3.607	0.9951	0.5012	1.5346	0.6794	0.6539	4.9259	0.4366	1.3495	0.813	1.0049	5.3799	1.20502	1.72789	1.43391
1-palmitoyl-2-linoleoyl-GPC (16:0/18:2)	Lipid	Phosphatidylcholine (PC)	42446	LC/MS Pos Late	1537	2160	758.569	5287971	40811-94-7		0.9408	0.5736	0.7366	0.465	1.3565	0.9017	0.7462	1.7793	1.2856	0.9591	1.7703	2.7356	0.9484	0.6532	2.3117	1.0409	1.216	1.089	1.129	0.8289	0.97444	1.3723	1.4083
beta-hydroxyisovalerate	Amino Acid	Leucine, Isoleucine and Valine Metabolism	12129	LC/MS Polar	1442	1149.8	117.056	69362	625-08-1		0.5609	0.986	1.0996	0.8742	0.8639	0.7072	0.9601	1.8345	0.9599	0.5609	1.0587	0.5609	1.0127	1	1.0114	0.9242	1.1138	0.5609	1.0533	4.6522	0.94072	1.29481	1.3764
spermine	Amino Acid	Polyamine Metabolism	603	LC/MS Pos Early	507	3350	203.223	1103	71-44-3	C00750	0.9718	2.0971	1.0282	0.6539	0.7734	1.5397	1.7065	0.4516	2.03	0.8736	0.4076	0.6072	1.4343	2.9375	2.9136	0.0634	1.3243	0.532	0.8146	5.6141	1.21258	1.66486	1.37299
urea	Amino Acid	Urea cycle; Arginine and Proline Metabolism	1670	LC/MS Pos Early	533	700	121.072	1176	57-13-6	C00086	0.6214	0.3716	1.6925	0.3023	2.7135	3.4843	0.4532	0.989	1.6588	0.3985	1.1087	0.4081	0.7704	0.9102	1.2952	0.3052	1.2958	1.011	2.3425	7.9535	1.26851	1.74006	1.37174
tryptophan betaine	Amino Acid	Tryptophan Metabolism	37097	LC/MS Pos Early	100001743	2673	247.144	442106	20671-76-5	C09213	1.2053	0.2151	1.6177	0.5943	2.1941	2.7361	2.8279	0.4359	1.9474	0.1004	0.1004	0.693	0.2163	1.1189	0.8811	0.1004	0.2184	0.5947	2.4474	12.1826	1.38742	1.85532	1.33724
quinate	Xenobiotics	Food Component/Plant	18335	LC/MS Polar	100000442	2432.9	191.056	6508	77-95-2	C00296	0.4733	0.2858	0.7546	1.0105	3.8664	0.4009	0.5016	0.6261	0.2952	0.2858	1	1.5749	0.2858	1.5554	0.2858	0.2858	0.2858	2.2815	2.3179	1.3676	0.85002	1.12405	1.32238
acetylcarnitine (C2)	Lipid	Fatty Acid Metabolism (Acyl Carnitine, Short Chain)	32198	LC/MS Pos Early	100000802	2282	204.123	7045767	5080-50-2	C02571	0.5396	1.0796	1.5791	0.3924	1.2101	1.6589	1.3773	0.6206	1.0531	0.9029	0.9469	0.8678	0.5856	0.7801	1.1246	0.1856	1.4204	0.8015	2.7207	4.3082	1.04136	1.37414	1.31956
X - 23644			49521	LC/MS Pos Early							0.9691	0.2342	1.2039	0.2342	0.8596	1	0.5351	1.4132	0.5117	0.2342	0.2342	2.7936	0.2342	0.2342	0.2342	0.2342	0.2342	2.3358	0.2342	2.7033	0.71952	0.94721	1.31645
1,5-anhydroglucitol (1,5-AG)	Carbohydrate	Glycolysis, Gluconeogenesis, and Pyruvate Metabolism	20675	LC/MS Neg	100000580	802	163.061	64960	154-58-5	C07326	0.376	0.4748	0.9634	0.6439	2.453	0.8116	0.4886	1.1046	1.1793	0.4474	0.5557	1.5439	1.4494	1.0366	0.5422	0.3226	1.6628	1.055	2.3878	1.1933	0.89426	1.17493	1.31386
glycerophosphoethanolamine	Lipid	Phospholipid Metabolism	37455	LC/MS Pos Early	100001620	659	216.063	123874	33049-08-0	C01233	0.824	0.8812	2.279	0.4178	0.9431	1.3106	1.6616	0.6012	1.0569	1.217	0.6242	2.0812	0.668	0.5094	2.1267	0.3581	2.0612	0.7698	2.3667	2.8976	1.11924	1.44629	1.29221
5-aminovalerate	Amino Acid	Lysine Metabolism	18319	LC/MS Pos Early	100000454	2220	118.086	138	660-88-8	C00431	0.1329	0.1329	0.1329	0.1329	0.7133	2.673	0.2866	0.3838	1.9999	0.1329	0.1329	0.6959	0.5285	0.1329	0.1329	0.1329	2.5923	1.4646	1.2867	1.4937	0.67211	0.85933	1.27856
creatine phosphate	Amino Acid	Creatine Metabolism	33951	LC/MS Polar	100000112	3831	210.029	587;9548602	922-32-7	C02305	1.3918	0.4554	0.8066	0.4554	0.4554	0.7442	1.2741	0.4554	0.4554	0.4554	0.8364	1.1636	0.4554	0.6376	1.1945	0.4554	1.614	0.4554	1.2927	0.6636	0.69491	0.87686	1.26183
malonate	Lipid	Fatty Acid Synthesis	15872	LC/MS Polar	818	3447	103.004	867	141-82-2;26522-22-85-0	C00383	0.8016	1.3444	0.778	1.2159	0.7753	2.3165	0.5613	3.5783	0.8298	1.0461	0.5351	0.4954	0.8031	0.5512	2.1443	2.9411	0.9539	2.7253	3.2534	1.9993	1.32472	1.64021	1.23816
1-stearoyl-2-arachidonoyl-GPC (18:0/20:4)	Lipid	Phosphatidylcholine (PC)	42450	LC/MS Pos Late	100001869	2400	810.601	16219824	35418-59-8		1.0023	0.6466	0.796	0.3899	1.3255	0.8938	0.9977	4.2583	0.9606	0.8782	0.9406	2.5789	0.6485	1.0208	2.0755	1.3191	1.2218	0.793	1.6276	2.1565	1.21489	1.43823	1.18384
1-stearoyl-GPC (18:0)	Lipid	Lysophospholipid	33961	LC/MS Neg	100001271	6870	598.373	497300	19420-57-6		0.8651	0.6797	0.4899	0.9072	1.021	0.4899	1.0841	2.28	0.6018	0.6164	0.994	1.4832	1.006	0.6108	2.1694	0.4899	1.1472	0.4899	0.4899	1.6286	0.90351	1.05089	1.16312
N-acetylaspartate (NAA)	Amino Acid	Alanine and Aspartate Metabolism	22185	LC/MS Polar	100000787	3143	174.041	65065	997-55-7;997-55-7	C01042	0.3889	1.212	0.9873	0.306	1.5743	3.1254	1.0424	0.2826	1.197	0.4998	0.333	1.0127	0.4663	0.6714	1.3052	0.3696	1.2655	0.7384	2.046	4.0199	1.06157	1.2228	1.15188
urate	Nucleotide	Purine Metabolism, (Hypo)Xanthine/Inosine containing	1604	LC/MS Pos Early	1134	776	169.036	1175	69-93-2;120K5305	C00366	0.5073	0.3084	1.1002	0.3713	1.7207	3.7493	0.5023	0.7296	1.1236	0.2598	0.6863	0.8475	1.1551	0.927	1.1871	0.2761	2.4163	1.073	1.3083	2.0278	1.03725	1.19045	1.1477
X - 24257			52311	LC/MS Neg							0.3348	0.5146	4.6691	0.3801	2.1198	11.035	1.0173	0.3204	1.1314	0.4906	0.3052	1.9943	0.4844	0.8612	2.5303	0.2354	4.6773	0.9827	6.6445	6.0807	2.20131	2.4796	1.12642
1-palmitoyl-2-arachidonoyl-GPC (16:0/20:4n6)	Lipid	Phosphatidylcholine (PC)	52462	LC/MS Pos Late	100008914	2200	782.569	10747814	35418-58-7	C05208	0.9219	0.7208	0.7092	0.4772	1.1919	0.7877	0.9326	3.136	1.1228	0.9151	1.0722	1.7306	0.5347	0.8156	2.2734	1.2756	1.1648	1.0567	0.9433	1.3545	1.09152	1.22214	1.11967
2-hydroxybutyrate/2-hydroxyisobutyrate	Amino Acid	Glutathione Metabolism	52281	LC/MS Polar	100008928	1258	103.04	4277439;440864		C21297,C05984	0.7475	0.7592	2.1517	0.3801	1.0931	1.2727	1	0.8449	1.7159	0.2294	1.4983	0.7433	0.8049	1.19	2.6046	0.2294	0.931	0.5023	1.3993	1.4931	1.01945	1.13962	1.11788
X - 18887			47301	LC/MS Neg							0.174	0.174	0.174	0.174	11.3978	0.174	0.174	0.174	0.174	0.174	0.174	1	0.174	0.174	0.8576	0.174	0.174	0.4514	2.4743	8.3161	1.29638	1.39694	1.07757
methylmalonate (MMA)	Lipid	Fatty Acid Metabolism (also BCAA Metabolism)	1496	LC/MS Polar	418	3078.4	117.019	487	516-05-2	C02170	1.0355	1.1035	1.0968	0.7939	0.9301	1.1583	0.9664	0.9742	1.035	0.8825	0.9206	1.1946	0.9216	1.0258	0.835	0.7055	0.9625	1.133	1.2108	1.623	0.99762	1.05324	1.05575
2,3-dihydroxyisovalerate	Xenobiotics	Food Component/Plant	38276	LC/MS Polar	100002417	1050	133.051	677	1756-18-9	C04039	0.8857	0.8857	0.8857	0.8857	0.8857	0.8857	0.8857	0.8857	0.8857	0.8857	0.8857	0.8857	0.8857	0.8857	0.8857	0.8857	0.8857	0.8857	1.1143	0.8857	0.8857	0.90856	1.02581
cytidine 2',3'-cyclic monophosphate	Nucleotide	Pyrimidine Metabolism, Cytidine containing	37465	LC/MS Neg	73	937	304.034	23421172	15718-51-1	C02354	1.4428	0.7262	1.5091	0.4316	1.2321	0.9529	0.4316	0.4316	2.229	1.0884	0.5867	1.7452	1.0471	0.854	0.5485	0.4316	3.7477	0.8034	0.4316	0.5353	1.04753	1.07311	1.02442
uridine-2',3'-cyclic monophosphate	Nucleotide	Pyrimidine Metabolism, Uracil containing	37137	LC/MS Neg	75	1090	305.018	439715	40632-52-8	C02355	0.928	0.928	1.8273	0.6786	1.7722	1.6497	0.4608	0.3943	2.3418	0.6917	0.6873	1.4562	1.1296	0.7785	1.3962	0.3943	2.9207	0.9292	1	1.2535	1.16724	1.19455	1.0234
beta-citrylglutamate	Amino Acid	Glutamate Metabolism	54923	LC/MS Neg	100003271	530	320.062	189741	73590-26-8	C20775	0.5306	1.0019	2.1284	0.5874	1.3457	1.1436	1.6345	0.5371	1.0284	0.8248	0.4896	1.298	0.5297	0.3026	0.9981	0.269	1.6222	0.9424	1.6981	2.7452	1.07624	1.08949	1.01231
1-palmitoyl-GPC (16:0)	Lipid	Lysophospholipid	33955	LC/MS Pos Late	100001263	1525	496.34	86554	17364-16-8	C04102	0.5981	0.5147	1.5171	0.4448	3.5402	1.3721	1.0253	3.6378	1.3125	0.3848	0.814	2.9099	0.5772	0.5417	3.296	0.7726	2.4113	0.9747	0.9701	1.1045	1.43474	1.4372	1.00171
2-hydroxyacetaminophen sulfate*	Xenobiotics	Drug - Analgesics, Anesthetics	33173	LC/MS Neg	100001791	1674	246.008	86290013			1	1	1	1	1	1	1	1	1	1	1	1	1	1	1	1	1	1	1	1	1	1	1
4-acetamidophenol	Xenobiotics	Drug - Analgesics, Anesthetics	12032	LC/MS Pos Early	1383	1670	152.071	1983	103-90-2	C06804	1	1	1	1	1	1	1	1	1	1	1	1	1	1	1	1	1	1	1	1	1	1	1
4-acetamidophenylglucuronide	Xenobiotics	Drug - Analgesics, Anesthetics	15736	LC/MS Neg	100000043	1400	326.088	83944;4022661	120595-80-4		1	1	1	1	1	1	1	1	1	1	1	1	1	1	1	1	1	1	1	1	1	1	1
4-acetaminophen sulfate	Xenobiotics	Drug - Analgesics, Anesthetics	37475	LC/MS Neg	2049	1792	230.013	83939	10066-90-7;32113-41-0	C06804	1	1	1	1	1	1	1	1	1	1	1	1	1	1	1	1	1	1	1	1	1	1	1
hydroxybupropion	Xenobiotics	Drug - Psychoactive	32882	LC/MS Pos Early	100001309	3479	256.11	446			1	1	1	1	1	1	1	1	1	1	1	1	1	1	1	1	1	1	1	1	1	1	1
N-desmethyl tramadol	Xenobiotics	Drug - Analgesics, Anesthetics	52355	LC/MS Pos Late	100006384	775	250.18	12149038	147762-57-0		1	1	1	1	1	1	1	1	1	1	1	1	1	1	1	1	1	1	1	1	1	1	1
O-desmethyltramadol	Xenobiotics	Drug - Analgesics, Anesthetics	53239	LC/MS Pos Early	100006382	3045	250.18	9838803	73986-53-5		1	1	1	1	1	1	1	1	1	1	1	1	1	1	1	1	1	1	1	1	1	1	1
tramadol	Xenobiotics	Drug - Analgesics, Anesthetics	53241	LC/MS Pos Early	100006381	3288	264.196	33741	27203-92-5	C07153	1	1	1	1	1	1	1	1	1	1	1	1	1	1	1	1	1	1	1	1	1	1	1
guanosine 3'-monophosphate (3'-GMP)	Nucleotide	Purine Metabolism, Guanine containing	39786	LC/MS Neg	100002704	773.9	362.051	135398727	117-68-0		0.5994	0.8074	0.5994	0.5994	0.5994	0.5994	0.5994	0.5994	2.314	0.5994	0.5994	0.5994	0.5994	0.5994	0.5994	0.5994	0.6702	1.1926	1.8568	0.5994	0.79166	0.79154	0.999848
butenoylcarnitine (C4:1)	Lipid	Fatty Acid Metabolism (Acyl Carnitine, Monounsaturated)	61778	LC/MS Pos Early	100016058	2765	230.139				1.3199	1.7978	0.7609	1.1837	1.5588	0.7875	0.8962	1.0435	0.9203	0.9206	1.6528	1.2618	1.4656	0.8678	0.9565	1.436	0.8959	0.9394	0.7609	0.7609	1.11892	1.09976	0.982876
guanosine	Nucleotide	Purine Metabolism, Guanine containing	1573	LC/MS Neg	1099	1662	282.084	6802	118-00-3	C00387	0.1007	1.8435	3.8641	0.3871	1.8321	0.9837	1.2839	0.1732	1.0163	0.5001	0.1798	1.2174	0.6152	0.2931	1.0861	0.266	1.3554	0.9641	2.1615	3.5992	1.19847	1.17378	0.979399
asmol	Xenobiotics	Drug - Respiratory	42588	LC/MS Pos Early	100003966	2722	240.159	2083	18559-94-9	C11770	0.2948	0.2948	0.2948	0.2948	1.3307	2.2488	0.2948	0.2948	0.3168	0.2948	0.2948	0.4469	0.2948	0.2948	0.6693	0.2948	1.3801	0.2948	1.5463	0.2948	0.59599	0.58114	0.975083
phosphocholine	Lipid	Phospholipid Metabolism	34396	LC/MS Pos Early	267	700	184.073	1014	72556-74-2	C00588	0.8928	0.5862	1.319	0.4036	1.0773	1.3985	1.4017	0.3685	0.9701	1.0299	0.4705	1.1869	0.4543	0.6296	1.3656	0.2633	1.4672	0.5654	1.5863	1.2107	0.94476	0.91998	0.973771
3-indoxyl sulfate	Amino Acid	Tryptophan Metabolism	27672	LC/MS Polar	100000467	751	212.002	10258	2642-37-7		0.5372	0.5372	0.6879	0.5372	1.048	0.5372	0.5372	0.5372	2.5299	0.5372	0.5372	0.591	1.036	0.5372	1.0816	0.5372	0.772	0.5372	0.964	1.0943	0.80262	0.76877	0.957826
salicylate	Xenobiotics	Drug - Topical Agents	1515	LC/MS Polar	501	802	137.024	338	69-72-7	C00805	0.8992	0.6742	1.0448	1.0984	0.6742	0.9926	0.6742	4.8783	0.6742	0.8626	0.6742	0.6742	0.6742	0.8768	1.4437	0.6742	1.046	0.9306	3.6238	1	1.24727	1.16177	0.93145
lidocaine	Xenobiotics	Drug - Analgesics, Anesthetics	35661	LC/MS Pos Late	100001538	746	235.18	3676	137-58-6	D00358	0.9892	0.6021	1.6552	0.3123	10.4197	14.1373	0.27	0.3267	1.0108	4.1221	0.164	4.2368	0.7109	0.0842	2.844	0.083	2.2542	4.1425	16.1679	0.0064	3.38454	3.06939	0.906885
citrate	Energy	TCA Cycle	1564	LC/MS Pos Early	1124	915	210.061	311	77-92-9	C00158	0.7597	0.7518	1.7847	0.9707	2.3971	3.8419	0.6159	0.6734	1.9945	1.4292	0.5134	1.0293	0.9183	0.565	0.8311	0.3108	4.1172	1.2375	1.9371	1.9241	1.52189	1.33838	0.87942
hexanoylcarnitine (C6)	Lipid	Fatty Acid Metabolism (Acyl Carnitine, Medium Chain)	32328	LC/MS Pos Early	100000781	3358	260.186	6426853	6920-35-0		1.1003	1.4176	1.6305	0.8456	0.7818	0.3643	1.7482	1.2066	0.7937	1.1451	1.0783	1.3052	0.5022	0.7914	0.4175	0.3643	0.9217	0.3643	0.5382	3.337	1.10337	0.96201	0.871883
choline	Lipid	Phospholipid Metabolism	15506	LC/MS Pos Early	1256	1961	104.107	305	67-48-1	C00114	0.4297	0.9281	1.2491	0.7133	5.9046	1.4278	0.6065	0.3138	3.2141	0.4269	0.4098	1.747	1.0719	0.8417	1.3426	0.4852	1.3864	0.9138	2.449	2.2885	1.52139	1.29359	0.850269
theophylline	Xenobiotics	Xanthine Metabolism	18394	LC/MS Neg	100000437	2356.9	179.058	2153	58-55-9	C07130	0.3578	0.3697	1	2.7773	0.3578	0.3578	0.3578	2.9826	2.6468	0.3578	0.5239	4.7767	0.6951	0.3578	0.3578	0.3578	0.3578	1.3798	0.5882	0.3578	1.15654	0.97527	0.843265
S-methylcysteine sulfoxide	Amino Acid	Methionine, Cysteine, SAM and Taurine Metabolism	43378	LC/MS Pos Early	100002927	900	152.038	82142	6853-87-8		1.4367	1	1.4125	0.3617	0.6831	0.9419	5.1213	0.6413	0.3617	3.8407	0.3617	5.9116	0.4617	0.3617	0.4575	0.3617	0.9924	0.3617	1.5418	2.2853	1.58009	1.30971	0.828883
adipate	Lipid	Fatty Acid, Dicarboxylate	21134	LC/MS Polar	100000863	3000	145.051	196	124-04-9	C06104	0.5415	0.5415	0.5415	0.8618	2.1494	1.1382	0.5415	0.5415	0.658	1.3159	0.5415	0.7882	0.5415	1.2469	0.5415	0.5415	0.761	0.5415	0.5415	1.2489	0.88308	0.7294	0.825973
betaine	Amino Acid	Glycine, Serine and Threonine Metabolism	3141	LC/MS Pos Early	799	1064	118.086	247	107-43-7	C00719	0.4152	1.7169	0.9675	0.6515	2.6387	1.6402	2.0393	0.553	1.6861	0.7905	0.4081	0.8709	0.9216	0.524	1.0325	0.3469	1.5288	1.3172	2.2401	1.4293	1.30989	1.06194	0.810709
N-acetylglutamine	Amino Acid	Glutamate Metabolism	33943	LC/MS Pos Early	100001253	845	189.087	182230	2490-97-3	C02716	0.4867	0.3436	0.4752	0.1313	0.5548	0.1313	0.1313	12.4365	0.1313	0.1313	0.1313	1.6603	0.7351	1.375	1	0.1313	1.032	0.1313	1.6481	3.5108	1.49533	1.13552	0.759378
N-ethylglycinexylidide	Xenobiotics	Drug - Analgesics, Anesthetics	33080	LC/MS Pos Early	100001539	3209	207.149	24415	7728-40-7	C16561	0.966	0.7343	1.2075	0.6523	3.0065	1.5689	0.1734	2.4207	2.9245	0.9788	0.2491	1.906	0.3773	0.1739	2.0751	0.0613	1.8306	1.0212	3.096	0.0902	1.46329	1.08807	0.743578
p-cresol sulfate	Xenobiotics	Benzoate Metabolism	36103	LC/MS Polar	100001315	717	187.007	4615423	3233-57-7		0.3543	0.4597	1.8312	1.0803	1.8826	0.5853	0.3586	2.2553	7.3827	0.5624	0.9412	1.8287	3.6624	0.3857	1.2943	0.8712	1.0588	1.6588	0.2918	0.3683	1.67524	1.23612	0.737876
3'-AMP	Nucleotide	Purine Metabolism, Adenine containing	35142	LC/MS Neg	100001449	1245	346.056	41211	84-21-9	C01267	0.2344	0.9765	0.2344	0.2344	0.2344	0.7447	1.4485	0.2344	2.3144	0.2344	0.2344	0.2344	0.2344	0.2344	0.3193	0.2344	0.2344	1.0235	2.076	0.2344	0.68905	0.50596	0.734286
5-dodecenoylcarnitine (C12:1)	Lipid	Fatty Acid Metabolism (Acyl Carnitine, Monounsaturated)	61769	LC/MS Pos Late	100016069	1135	342.264	91825571			0.3653	1.407	1.0854	0.9521	0.4525	0.3653	0.502	0.3653	1.8168	0.4609	1.6392	0.3653	0.3653	0.3653	0.3653	0.3653	0.3653	0.3653	0.3653	1.0479	0.77726	0.56095	0.721702
3-hydroxybutyrate (BHBA)	Lipid	Ketone Bodies	542	LC/MS Polar	254	1480	103.04	441;94318;92135	625-72-9	C03197,C01089	1.2635	3.1496	0.7186	1.1157	0.4692	1.6522	2.5555	0.7129	0.3613	0.2558	1.1359	1.3801	1.1028	0.2983	1	0.2558	0.33	0.3391	1.9445	0.9141	1.22543	0.87006	0.710004
octanoylcarnitine (C8)	Lipid	Fatty Acid Metabolism (Acyl Carnitine, Medium Chain)	33936	LC/MS Pos Late	100001247	950	288.217	11953814;123701	3671-77-0	C02838	1.0253	1.3495	1.5211	0.7845	1.5952	1	1.0293	0.6086	1.019	0.7613	1.2052	0.6797	0.5698	0.2982	0.9328	0.2982	0.2982	0.2982	0.8166	2.1525	1.06938	0.75494	0.70596
theobromine	Xenobiotics	Xanthine Metabolism	18392	LC/MS Pos Early	100000445	1600	181.072	5429	83-67-0	C07480	0.3302	0.3269	5.9527	2.7501	1	8.49	0.4366	3.2912	2.3756	0.3773	1.0162	6.4562	0.5303	0.525	0.3269	0.3269	0.3387	7.0754	0.5771	0.3269	2.53306	1.74996	0.690848
sedoheptulose-7-phosphate	Carbohydrate	Pentose Phosphate Pathway	35649	LC/MS Neg	100001628	599.6	289.033	616	2646-35-7	C05382	0.1246	1.6507	1.0175	0.1246	0.8465	0.9825	1.0434	0.1246	2.0087	0.1246	0.1246	0.5358	0.1246	0.1246	0.4389	0.1246	1.2046	0.1246	1.9324	0.7538	0.80477	0.54885	0.681996
myristoleoylcarnitine (C14:1)*	Lipid	Fatty Acid Metabolism (Acyl Carnitine, Monounsaturated)	48182	LC/MS Pos Late	100006051	1316	370.295	129691961	889848-55-9		0.8934	1.6904	2.0904	1.0267	0.8508	1.0453	0.4526	0.7725	1.3838	0.9042	2.647	0.4526	0.4526	0.4526	0.4526	0.4526	0.4526	0.4526	0.4526	0.9733	1.11101	0.72411	0.651758
laurylcarnitine (C12)	Lipid	Fatty Acid Metabolism (Acyl Carnitine, Medium Chain)	34534	LC/MS Pos Late	100001392	1235	344.279	168381	25518-54-1		0.8851	2.0073	1.5488	0.9262	1.1344	1.3956	0.4564	0.7152	1.6729	1.0738	2.7094	0.3382	0.3382	0.3382	0.3887	0.3382	0.4587	0.3382	0.5865	1.785	1.18157	0.76193	0.644845
mannose	Carbohydrate	Fructose, Mannose and Galactose Metabolism	584	LC/MS Polar	803	2200	179.056	185698;82308;18950;439680	3458-28-4	C00159,C02209,C00936	0.4964	0.4964	0.9841	0.9072	1.7132	1.3464	0.723	0.4964	1.0341	1.7798	0.4964	0.4964	0.4964	0.4964	0.4964	0.4964	1.0159	0.5111	0.586	1.3254	0.9977	0.64168	0.643159
1,2-dilinoleoyl-GPC (18:2/18:2)	Lipid	Phosphatidylcholine (PC)	52603	LC/MS Pos Late	100008903	2100	782.569	5288075	998-06-1		0.6847	0.3522	0.6777	0.373	4.9309	1.9848	0.6171	1.4448	1.386	1.1936	2.223	1.9228	1	0.3128	1.2823	0.3128	0.5838	0.3128	0.5114	0.3128	1.36448	0.87745	0.643065
glycerol 3-phosphate	Lipid	Glycerolipid Metabolism	43847	LC/MS Pos Early	100000258	580	173.021	754	29849-82-9	C0093	0.726	0.95	4.3119	0.4226	2.6302	1.9127	1.4322	0.6182	1.6586	1	0.3034	0.8518	0.6479	0.4654	1.9035	0.3034	2.4082	0.4359	1.7112	1.0278	1.56624	1.00585	0.642207
4-methylcatechol sulfate	Xenobiotics	Benzoate Metabolism	46146	LC/MS Neg	100004111	2665	203.002	54104170			0.984	0.6504	1.7562	0.9306	1.3372	3.1737	0.5634	1.9096	5.8738	0.5792	1.2836	2.1762	2.638	0.5654	1.016	0.6601	1.1203	0.7198	0.3757	0.5862	1.77581	1.11413	0.627393
phosphoethanolamine (PE)	Lipid	Phospholipid Metabolism	1600	LC/MS Neg	1026	638	140.012	1015	1071-23-4	C00346	0.8638	1.0902	2.5919	0.5666	1.2897	2.0224	2.1499	0.5183	1.2131	1.1538	0.3707	0.9331	0.5332	0.5582	1.0669	0.2178	1.5012	0.6476	1.8239	0.6869	1.34597	0.83395	0.61959
3-hydroxyindolin-2-one	Xenobiotics	Food Component/Plant	42561	LC/MS Pos Early	100003823	2035	132.044	6097	61-71-2	C11130	0.6255	1.0442	0.3958	2.3188	0.3797	1	0.3797	0.3797	2.5864	1.6548	0.3797	2.3174	0.7084	0.3797	0.9168	0.3797	0.3797	0.3797	0.3797	0.3797	1.07646	0.66005	0.613167
glycerophosphorylcholine (GPC)	Lipid	Phospholipid Metabolism	15990	LC/MS Pos Early	100000269	672	258.11	71920	28319-77-9	C00670	0.926	1.085	2.9638	0.513	1.2948	1.3435	1.8756	0.7489	1.6139	1.3297	0.6481	1.074	0.5832	0.4243	1.2279	0.2993	1.6511	0.404	0.8671	0.8152	1.36942	0.79942	0.583765
myo-inositol	Lipid	Inositol Metabolism	1124	LC/MS Polar	363	3506.3	225.062	892	87-89-8	C00137	1.016	0.984	2.4616	0.4993	1.9812	1.7252	2.0744	0.6082	0.9726	1.3835	0.3118	0.697	0.4446	0.4321	1.0162	0.1843	1.2284	0.4834	1.2826	1.8371	1.3706	0.79175	0.577667
glutathione, reduced (GSH)	Amino Acid	Glutathione Metabolism	2127	LC/MS Neg	496	790	306.077	124886	70-18-8	D00014,C00051	1.1681	1.4508	1.4218	0.2309	0.8059	2.0149	3.8721	0.1847	0.6325	4.184	0.1847	0.1847	0.1847	0.2077	0.8319	0.1847	0.2514	0.1847	6.5197	0.1847	1.59657	0.89189	0.558629
glycerophosphoglycerol	Lipid	Glycerolipid Metabolism	48857	LC/MS Polar	100001619	2430	245.043	54575349		C03274	0.8142	2.0134	1.4595	0.5537	1.6027	1.4013	1.4385	0.4225	3.9801	0.6248	0.5191	1.1858	1.1993	0.637	1.228	0.2422	1.2261	0.6126	0.6878	0.4417	1.43107	0.79796	0.557597
decanoylcarnitine (C10)	Lipid	Fatty Acid Metabolism (Acyl Carnitine, Medium Chain)	33941	LC/MS Pos Late	100001251	1130	316.248	10245190	1492-27-9		1.3633	1.5001	1.5574	1.1556	1.2366	1	0.5414	0.9164	1.6846	0.8583	2.0834	0.4649	0.3595	0.3789	0.3857	0.3595	0.3595	0.3595	0.5639	1.1815	1.18137	0.64963	0.549895
ophthalmate	Amino Acid	Glutathione Metabolism	34592	LC/MS Pos Early	100001311	2085	290.135	7018721	495-27-2		1.3051	0.2196	1.2715	0.2196	0.2196	1.4105	0.9462	0.2394	0.3509	1.3218	0.2196	0.2196	0.2196	0.2196	1.0538	0.2196	0.2196	0.2196	0.9297	0.2196	0.75042	0.37403	0.498428
X - 11615			32932	LC/MS Neg							0.3708	0.5123	0.3708	0.3708	1.6996	9.0784	0.3708	0.3708	0.3708	1.0908	0.3708	2.7423	0.3708	0.3708	0.3708	0.3708	0.3708	0.9092	0.723	0.3708	1.46059	0.69701	0.477211
glutathione, oxidized (GSSG)	Amino Acid	Glutathione Metabolism	38783	LC/MS Pos Early	448	2667	307.083	65359	103239-24-3	D00031,C00127	1.4022	1.3392	4.5362	0.5097	0.9578	3.6834	3.726	0.8305	1.8212	1.246	0.5419	0.5023	0.2936	0.6955	1.0422	0.2129	1.5155	0.3891	2.6445	0.1015	2.00522	0.7939	0.395917
dexpanthenol	Xenobiotics	Chemical	38314	LC/MS Pos Early	100002376	1740	206.139	4678	16485-10-2	D03726	1.7187	0.4992	0.8157	0.4992	1.4573	73.3758	0.4992	0.6795	0.7039	1.2071	0.4992	0.5197	1.2765	0.4992	0.864	0.4992	0.4992	0.6028	1.136	2.9598	8.14556	0.93556	0.114855
adenosine	Nucleotide	Purine Metabolism, Adenine containing	555	LC/MS Neg	798	2075.4	134.047	60961	58-61-7	C00212	1.0815	6.4291	12.1796	2.8524	0.9185	5.6233	5.5429	1.4434	5.1999	4.0728	1.3406	0.1371	0.2005	0.1247	0.1938	0.1488	0.5469	0.2464	0.2616	0.1714	4.53434	0.33718	0.0743614
