# Supplementary material for: Metabolic basis for the evolution of a common pathogenic Pseudomonas aeruginosa variant
Source: eLife. 2022 May 3;11:e76555. doi: 10.7554/eLife.76555 (PMC9224983; doi:10.7554/eLife.76555)
Supplement: Supplementary file 5. — Values listed are micromolar concentrations for specified metabolites quantified in the BAL samples from people with and without CF (non-CF) using the Biocrates AbsoluteIDQ p180 Kit (n = 10 and 2, respectively). The percent forced expiratory volume in 1 s is noted for samples from people with CF as part of the column title. In addition to the concentrations listed per sample for each amino acid, the average is shown for samples from people with and without CF as well as a ratio of the averages. [file elife-76555-supp5.xlsx]

## Sheet: Notes
Supplementary File 5. Amino acid and biogenic amine concentrations in bronchioalveolar lavage (BAL) fluid from people with cystic fibrosis (CF) and non-CF comparators. Values listed are micromolar concentrations for specified metabolites quantified in the BAL samples from people with and without CF (non-CF) using the Biocrates AbsoluteIDQ p180 Kit (n = 10 and 2, respectively). The percent forced …

## Sheet: data_FEV
Metabolite	Class	CF FEV 92	CF FEV 91	CF FEV 91	CF FEV 61	CF FEV 112	CF FEV 77	CF FEV 76	CF FEV 59	CF FEV 63	CF FEV 113	non-CF 1	non-CF 2	CF average	non-CF Average	Average in CF/Average in non-CF
Lys	Aminoacids	929.2	181.6	314.8	1542	33.08	148.8	71.6	429.6	5025.2	13.96	42.8	38.2	868.984	40.5	21.4564
Glu	Aminoacids	576.8	224.8	237.6	853.6	32.16	131.6	41.6	368	4016.4	33.28	69.2	142.8	651.584	106	6.14702
Ala	Aminoacids	414.8	174.4	264	875.2	21.32	156.8	38.84	574.8	3942	19.04	54.4	36.6	648.12	45.5	14.2444
Val	Aminoacids	342.4	130.4	186.4	660	19.6	108	36.12	373.2	2773.2	12.72	23.52	18.24	464.204	20.88	22.232
Gly	Aminoacids	512.8	202	196	702	29.6	154.4	51.2	269.6	2191.2	39.84	103.6	234	434.864	168.8	2.57621
Thr	Aminoacids	300.8	76	116.8	293.2	17.48	50.4	34.6	301.6	2634.8	6.72	23.08	12.52	383.24	17.8	21.5303
Ile	Aminoacids	241.6	86	184.4	511.2	17.16	110	26.88	356	2195.6	3.788	15.32	6.52	373.263	10.92	34.1816
Ser	Aminoacids	238.8	76.8	126	292	17.8	61.2	28.68	266	2274.8	10.88	44.8	27.72	339.296	36.26	9.35731
Pro	Aminoacids	189.2	100	90.8	329.6	8.24	92	28.68	262	1450.4	8.68	25.72	20.6	255.96	23.16	11.0518
Orn	Aminoacids	152	48.4	139.2	594.4	8.12	54.4	17.6	131.6	1294.4	2.988	3.02	9.24	244.311	6.13	39.8549
Asp	Aminoacids	119.2	54	66.4	324.8	7.2	41.6	14.72	121.2	1486.4	9.92	30.64	50.4	224.544	40.52	5.54156
Taurine	Biogenic Amines	316	244.4	286	345.2	60	160	95.2	281.2	374.8	60	134.8	198.4	222.28	166.6	1.33421
Tyr	Aminoacids	134	48.8	99.6	322	7.56	50	13.84	202.8	1188	3.488	12.88	13.96	207.009	13.42	15.4254
Phe	Aminoacids	148.8	54.4	99.6	322.8	8.24	57.2	13.96	192	1075.6	3.252	14.28	9.72	197.585	12	16.4654
His	Aminoacids	107.6	32.56	48.4	192.4	5.28	20.6	11.52	126.4	807.2	4.08	9.52	15.64	135.604	12.58	10.7793
Cit	Aminoacids	111.6	29	22.08	84	5.28	22.24	13.4	168.4	891.2	1.176	1.144	2.232	134.838	1.688	79.8801
Met	Aminoacids	61.6	28.12	49.6	154.8	0.04	38.36	4.92	117.6	583.6	1.796	9.08	2.188	104.044	5.634	18.4671
Arg	Aminoacids	175.2	72.4	71.2	123.6	11.4	69.6	19.88	125.6	334.8	9	37.36	25.16	101.268	31.26	3.23954
Gln	Aminoacids	177.2	132.4	94	276.4	12.28	37.76	10.16	1.4	206.8	27.84	30.88	47.2	97.624	39.04	2.50061
Asn	Aminoacids	82	23.52	34.36	108.4	4.6	6.84	7.72	5.04	412.4	2.788	6.44	5.56	68.7668	6	11.4611
Trp	Aminoacids	36.84	12.28	30.72	94.4	1.876	14.04	3.356	35.36	250.8	0.44	2.692	1.256	48.0112	1.974	24.3218
Met-SO	Biogenic Amines	27.32	3.652	8.32	27.6	4.6	6.2	7.36	47.6	141.6	0.136	0.328	0.168	27.4388	0.248	110.64
Spermine	Biogenic Amines	14.4	8.28	9.4	21.28	0.6	5	1.136	5.48	75.6	1.308	5.08	2.184	14.2484	3.632	3.92302
Creatinine	Biogenic Amines	9.12	14.4	5.28	11.92	0.812	4.16	1.868	2.392	24.8	3.116	2.004	7.24	7.7868	4.622	1.68473
Putrescine	Biogenic Amines	7.04	2.644	0.68	3.156	0.296	1.96	0.904	7.8	10.48	0.292	0.348	0.572	3.5252	0.46	7.66348
t4-OH-Pro	Biogenic Amines	2.104	2.964	0.62	2.1	0.236	2.808	0.328	0.748	11.64	0.948	1.14	2.224	2.4496	1.682	1.45636
Spermidine	Biogenic Amines	2.664	0.952	0.88	2.02	0.256	0.78	0.188	1.696	4.04	0.352	0.924	0.76	1.3828	0.842	1.64228
ADMA	Biogenic Amines	0.68	0.252	0.332	0.72	0.032	0.112	0.032	0.452	5.64	0.032	0.156	0.032	0.8284	0.094	8.81277
alpha-AAA	Biogenic Amines	1.372	0.16	0.216	2.228	0.16	0.16	0.16	0.16	1.848	0.16	0.16	0.172	0.6624	0.166	3.99036
Kynurenine	Biogenic Amines	1.032	0.244	0.12	0.856	0.12	0.12	0.12	0.52	2.92	0.12	0.12	0.12	0.6172	0.12	5.14333
Sarcosine	Biogenic Amines	0.584	0.344	0.196	1.044	0.136	0.3	0.176	0.172	1.024	0.124	0.216	0.908	0.41	0.562	0.729537
Carnosine	Biogenic Amines	0.428	0.04	0.04	0.288	0.088	0.06	0.04	0.072	1.6	0.04	0.04	0.04	0.2696	0.04	6.74
SDMA	Biogenic Amines	0.152	0.076	0.084	0.192	0.012	0.024	0.024	0.052	1.036	0.012	0.024	0.028	0.1664	0.026	6.4
Histamine	Biogenic Amines	1.168	0.044	0.004	0.076	0.004	0.004	0.004	0.004	0.004	0.004	0.004	0.004	0.1316	0.004	32.9
DOPA	Biogenic Amines	0.068	0.096	0.092	0.124	0.068	0.068	0.068	0.104	0.5	0.068	0.068	0.068	0.1256	0.068	1.84706
Dopamine	Biogenic Amines	0.12	0.12	0.12	0.12	0.12	0.12	0.12	0.12	0.12	0.12	0.12	0.12	0.12	0.12	1
Nitro-Tyr	Biogenic Amines	0.12	0.12	0.12	0.12	0.12	0.12	0.12	0.12	0.12	0.12	0.12	0.12	0.12	0.12	1
Ac-Orn	Biogenic Amines	0.08	0.08	0.08	0.228	0.08	0.08	0.08	0.08	0.08	0.08	0.08	0.08	0.0948	0.08	1.185
c4-OH-Pro	Biogenic Amines	0.04	0.04	0.06	0.052	0.04	0.04	0.056	0.056	0.084	0.052	0.04	0.052	0.052	0.046	1.13043
Serotonin	Biogenic Amines	0.012	0.012	0.012	0.012	0.012	0.012	0.012	0.012	0.012	0.012	0.012	0.012	0.012	0.012	1
PEA	Biogenic Amines	0.008	0.008	0.008	0.008	0.008	0.008	0.008	0.008	0.008	0.008	0.008	0.008	0.008	0.008	1
